# Supplementary material
Source: publisher figshare collection journal article supplement (https://gsajournals.figshare.com/articles/dataset/_/28824782)
Supplement: Supplementary file 1 [file 1]

## Sheet: DNA constructs
MNp #	Addgene #	Type	Name	Description	Reference	Size (bp)	Sequence (of novel reagents)			Location
1668	18937	plasmid	pTA-attB	full-length phiC31 attB site in an Invitrogen vector pcr 2.1 TOPO	Groth et al. 2000	4203				used to make [4082]
1669	18939	plasmid	pTA-attP	full-length phiC31 attP site in an Invitrogen vector pcr 2.1 TOPO	Groth et al. 2000	4139				used to make [4085]
2507		plasmid	RK1062	UAS 5X cassette driving Cherry in pBS vector	Distel et al. 2009	3802				used to make [4225]
3055		plasmid	DR274 U6	T7 gRNA assembly clone	Nonet, 2020	2675	TGGGCCTTTCTTCGGTAGAAAATCAAAGGATCTTCttgagatcctttttttctgcgcgtaatctgctgcttgcaaacaaaaaaaccaccgctaccagcggtggtttgtttgccggatcaagagctaccaactctttttccgaggtaactggcttcagcagagcgcagataccaaatactgttcttctagtgtagccgtagttaggccaccacttcaagaactctgtagcaccgcctacatacctcgctctgctaatcctgttaccagtggctgctgccagtggcgataagtcgtgtcttaccgggttggactcaagacgatagttaccggataaggcgcagcggtcgggctgaacggggggttcgtgcacacagcccagcttggagcgaacgacctaca…			used to make [3771] & [3772]
3358		plasmid	phat-5p mCherry V2A GFP rab-3	phat-5 promoter driving mCherry V2A GFP rab-3	Nonet, 2020	6926	tcgcgcgtttcggtgatgacggtgaaaacctctgacacatgcagctcccggagacggtcacagcttgtctgtaagcggatgccgggagcagacaagcccgtcagggcgcgtcagcgggtgttggcgggtgtcggggctggcttaactatgcggcatcagagcagattgtactgagagtgcaccataccacagcttttcaattcaattcatcattttttttttattcttttttttgatttcggtttctttgaaatttttttgattcggtaatctccgaacagaaggaagaacgaaggaaggagcacagacttagattggtatatatacgcatatgtagtgttgaagaaacatgaaattgcccagtattcttaacccaactgcacagaacaaaaacctgca…			used to make [3905]
3426		plasmid	pDD372 GFP-C1	GFP-C1 in a GG SapI ATG AAG assembly vector	Dickinson, Slabodnick, Chen, & Goldstein, 2018	3424				used to make [3801], [4004], [4080], [4011], [4012], [4058], [4073], [4101], [4173], [4201], [4236], [4237], [4238], [4276], [4277], [4364], [4356], [4357], [4358], [4359], [4364], [4391], [4392], [4393], [4421], [4423], [4424], [4487], [4488], [4489], [4490], [4721], [4731], [4732], [4733], [4828], [4829], [4830], [4831], [4832], [4833], [5034], & [5035]
3460		plasmid	DR274 FP TIR1	TIR1 in a GG SapI ATG AAG assembly vector	Knoebel, Dour, & Nonet, 2023	3770	TGGGCCTTTCTTCGGTAGAAAATCAAAGGATCTTCttgagatcctttttttctgcgcgtaatctgctgcttgcaaacaaaaaaaccaccgctaccagcggtggtttgtttgccggatcaagagctaccaactctttttccgaggtaactggcttcagcagagcgcagataccaaatactgttcttctagtgtagccgtagttaggccaccacttcaagaactctgtagcaccgcctacatacctcgctctgctaatcctgttaccagtggctgctgccagtggcgataagtcgtgtcttaccgggttggactcaagacgatagttaccggataaggcgcagcggtcgggctgaacggggggttcgtgcacacagcccagcttggagcgaacgacctaca…			used to make [4143]
3467		plasmid	DR274 5' arm - BsaI	GG BsaI vector for creating SapI TGG GCG assembly clones	Nonet, 2020	1921	TGGGCCTTTCTTCGGTAGAAAATCAAAGGATCTTCttgagatcctttttttctgcgcgtaatctgctgcttgcaaacaaaaaaaccaccgctaccagcggtggtttgtttgccggatcaagagctaccaactctttttccgaggtaactggcttcagcagagcgcagataccaaatactgttcttctagtgtagccgtagttaggccaccacttcaagaactctgtagcaccgcctacatacctcgctctgctaatcctgttaccagtggctgctgccagtggcgataagtcgtgtcttaccgggttggactcaagacgatagttaccggataaggcgcagcggtcgggctgaacggggggttcgtgcacacagcccagcttggagcgaacgacctaca…			used to make [3505], [4191], [4225], [4377], [4378], [4379], [4410], [4635], [4636], [4637], [4638], [4648], [4714], [4740], [4766], [4867], [4868], & [4869]
3468		plasmid	DR274 CT - BsaI	GG BsaI vector for creating SapI GCG ATG assembly clones	Nonet, 2020	1921	TGGGCCTTTCTTCGGTAGAAAATCAAAGGATCTTCttgagatcctttttttctgcgcgtaatctgctgcttgcaaacaaaaaaaccaccgctaccagcggtggtttgtttgccggatcaagagctaccaactctttttccgaggtaactggcttcagcagagcgcagataccaaatactgttcttctagtgtagccgtagttaggccaccacttcaagaactctgtagcaccgcctacatacctcgctctgctaatcctgttaccagtggctgctgccagtggcgataagtcgtgtcttaccgggttggactcaagacgatagttaccggataaggcgcagcggtcgggctgaacggggggttcgtgcacacagcccagcttggagcgaacgacctaca…			used to make [3588], [4337], [4341], [4345], [4381], [4382], [4383], [4452], [4453], [4454], [4476], [4804], [4805], [4806], [4807]. & [4808]
3469		plasmid	DR274 FP - BsaI	GG BsaI vector for creating SapI ATG AAG assembly clones	Nonet, 2020	1921	TGGGCCTTTCTTCGGTAGAAAATCAAAGGATCTTCttgagatcctttttttctgcgcgtaatctgctgcttgcaaacaaaaaaaccaccgctaccagcggtggtttgtttgccggatcaagagctaccaactctttttccgaggtaactggcttcagcagagcgcagataccaaatactgttcttctagtgtagccgtagttaggccaccacttcaagaactctgtagcaccgcctacatacctcgctctgctaatcctgttaccagtggctgctgccagtggcgataagtcgtgtcttaccgggttggactcaagacgatagttaccggataaggcgcagcggtcgggctgaacggggggttcgtgcacacagcccagcttggagcgaacgacctaca…			used to make [3550] & [3978]
3643	153083	plasmid	loxP SapI MCS FRT FRT3 hygR sqt Cre	SapI TGG GTA GG loxP FRT FRT3 RMCE integration vector	Nonet, 2020	7855	GAAGTTCCTATTCtctagaaaGTATAGGAACTTCATGAAAAAGCCTGAACTCACCGCGACGTCTGTCGAGAAGTTTCTGATCGAAAAGTTCGACAGCGTCTCCGACCTGATGCAGCTCTCGGAGGGCGAAGAATCTCGTGCTTTCAGCTTCGATGTAGGAGGGCGTGGATATGTCCTGCGGGTAAATAGCTGCGCCGATGGTTTCTACAAAGATCGTTATGTTTATCGGCACTTTGCATCGGCCGCGCTCCCGATTCCGGAAGTGCTTGACATTGGGGAATTCAGCGAGAGCCTGACCTATTGCATCTCCCGCCGTGCACAGGGTGTCACGTTGCAAGACCTGCCTGAAACCGAACTGCCCGCTGTTCTGCAGCCGGTCGCGGAGGCCATGGATGCGAT…			used to make [3801], [3848], [3917], [4080], [4011], [4012], [4058], [4071], [4072], [4081], [4173], [4201], [4236], [4237], [4238], [4355], [4356], & [4357]
3689	154111	plasmid	pCFJ1272 mex-5 FLP FRT FRT3 landing	miniMos vector to create RMCE loxP FRT FRT3 landing site that also contains a mex-5 promoter driving FLP D5	Nonet, 2020	14829	GCACCGTACGTCTCGAGGAATTCTATCAGGTGTACAAGTATGAAATGTCGTTTCGAACATATAGATGTCTCGCAAACGTAAATATTTATCGATTGTCATAAAACTTTGACCTTGTGAAGTGTCAACCTTGACTGTCGAACCACCATAGTTTGGCGCGAATTGAGCGTCATAATTGTTTACTCTCAGTGCAGTCAACATGTCGAGTTTCGTGCCGAATAAAGAGCAAACGCGGACAGTATTAATTTTCTGTTTTCATTTGAAGAAAACAGCTGCGGccggatccaggaaacagctatgaccatgattacgccaagctatcaactttgtatagaaaagttgAGCTCCACCGCGGTGGCGGCCGCTCTAGAACTAGGctgtttcgAAGgtaagtttaaaATA…			used to make [4069]
3694		plasmid	DR274 SEC-3' arm tbb-2 3'	tbb-2 3' UTR in a GG SapI AAG GTA assembly vector	Nonet, 2020	2222	TGGGCCTTTCTTCGGTAGAAAATCAAAGGATCTTCttgagatcctttttttctgcgcgtaatctgctgcttgcaaacaaaaaaaccaccgctaccagcggtggtttgtttgccggatcaagagctaccaactctttttccgaggtaactggcttcagcagagcgcagataccaaatactgttcttctagtgtagccgtagttaggccaccacttcaagaactctgtagcaccgcctacatacctcgctctgctaatcctgttaccagtggctgctgccagtggcgataagtcgtgtcttaccgggttggactcaagacgatagttaccggataaggcgcagcggtcgggctgaacggggggttcgtgcacacagcccagcttggagcgaacgacctaca…			used to make [3801], [4080], [4011], [4012], [4058], [4073], [4101], [4161], [4173], [4201], [4236], [4237], [4238], [4276], [4277], [4356], [4357], [4358], [4359], [4364], [4391], [4392], [4393], [4421], [4423], [4424], [4487], [4488], [4489], [4490], [4651], [4652], [4657], [4658], [4669], [4674], [4721], [4731], [4732], [4733], [4775], [4825], [4828], [4829], [4830], [4831], [4832], [4833], [4…
3695		plasmid	DR274 5' arm-CT tetO 7X ∆pes-10	tetO 7X pes-10 basal promoter in a GG SapI TGG ATG assembly vector	Nonet, 2020	2367	TGGGCCTTTCTTCGGTAGAAAATCAAAGGATCTTCttgagatcctttttttctgcgcgtaatctgctgcttgcaaacaaaaaaaccaccgctaccagcggtggtttgtttgccggatcaagagctaccaactctttttccgaggtaactggcttcagcagagcgcagataccaaatactgttcttctagtgtagccgtagttaggccaccacttcaagaactctgtagcaccgcctacatacctcgctctgctaatcctgttaccagtggctgctgccagtggcgataagtcgtgtcttaccgggttggactcaagacgatagttaccggataaggcgcagcggtcgggctgaacggggggttcgtgcacacagcccagcttggagcgaacgacctaca…			used to make [4842], [4843], [4935], [4938], [4939], [4952], [4953], [4954], [4955], & [4956]
3698		plasmid	DR274 5' arm-CT - BsaI	GG BsaI vector for creating SapI TGG ATG assembly clones	Nonet, 2020	1921	gttggaacctcttacgtgccGATCAAGTCAAAAGCCTCCGGTCGGAGGCTTTTGACTTTCTGCTATGGAGGTCAGGTATGATTTttGAATTCGCTCTTCgTGGAGAGACCgcaatGGATCCaaccattGGTCTCAATGaGAAGAGCAAGCTTGGATCGACGAGAGCAGCGCGACTGGATCTGTCGCCCGTCTCAAACGCAACCCTCCGGCGGTCGCATATCATTCAGGACGAGCCTCAGACTCCAGCGTAACTGGACTGCAATCAACTCACTGGCTCACCTTCCGGTCCACGATCAGCTAGAATCAAGCTGACTAGATAAACTGGCCGTCGTTTTACACGGGTGGGCCTTTCTTCGGTAGAAAATCAAAGGATCTTCttgagatcctttttttctgcgc…			used to make [3797], [3837], [3905], & [3947]
3699		plasmid	DR274 FP mNG	mNG in a GG SapI ATG AAG assembly vector	Nonet, 2023	2795	TGGGCCTTTCTTCGGTAGAAAATCAAAGGATCTTCttgagatcctttttttctgcgcgtaatctgctgcttgcaaacaaaaaaaccaccgctaccagcggtggtttgtttgccggatcaagagctaccaactctttttccgaggtaactggcttcagcagagcgcagataccaaatactgttcttctagtgtagccgtagttaggccaccacttcaagaactctgtagcaccgcctacatacctcgctctgctaatcctgttaccagtggctgctgccagtggcgataagtcgtgtcttaccgggttggactcaagacgatagttaccggataaggcgcagcggtcgggctgaacggggggttcgtgcacacagcccagcttggagcgaacgacctaca…			used to make [4651], [4652], [4657], [4658], [4669], [4674], [4876], [4877], [4878], [4881], & [4935]
3700		plasmid	DR274 5' arm UAS 11X	UAS 11X in a GG SapI TGG GCG assembly vector	Nonet, 2020	2210	TGGGCCTTTCTTCGGTAGAAAATCAAAGGATCTTCttgagatcctttttttctgcgcgtaatctgctgcttgcaaacaaaaaaaccaccgctaccagcggtggtttgtttgccggatcaagagctaccaactctttttccgaggtaactggcttcagcagagcgcagataccaaatactgttcttctagtgtagccgtagttaggccaccacttcaagaactctgtagcaccgcctacatacctcgctctgctaatcctgttaccagtggctgctgccagtggcgataagtcgtgtcttaccgggttggactcaagacgatagttaccggataaggcgcagcggtcgggctgaacggggggttcgtgcacacagcccagcttggagcgaacgacctaca…			used to make [4236]
3702		plasmid	DR274 SEC-3' arm - BsaI	GG BsaI vector for creating SapI AAG GTA assembly clones	Nonet, 2020	1921	TGGGCCTTTCTTCGGTAGAAAATCAAAGGATCTTCttgagatcctttttttctgcgcgtaatctgctgcttgcaaacaaaaaaaccaccgctaccagcggtggtttgtttgccggatcaagagctaccaactctttttccgaggtaactggcttcagcagagcgcagataccaaatactgttcttctagtgtagccgtagttaggccaccacttcaagaactctgtagcaccgcctacatacctcgctctgctaatcctgttaccagtggctgctgccagtggcgataagtcgtgtcttaccgggttggactcaagacgatagttaccggataaggcgcagcggtcgggctgaacggggggttcgtgcacacagcccagcttggagcgaacgacctaca…			used to make [3907], [4314], [4765], [4797], [4873], [4879], & [4880]
3703		plasmid	DR274 5' arm lexO 5X	lexO 5X in a GG SapI TGG GCG assembly vector	Nonet, 2020	1999	TGGGCCTTTCTTCGGTAGAAAATCAAAGGATCTTCttgagatcctttttttctgcgcgtaatctgctgcttgcaaacaaaaaaaccaccgctaccagcggtggtttgtttgccggatcaagagctaccaactctttttccgaggtaactggcttcagcagagcgcagataccaaatactgttcttctagtgtagccgtagttaggccaccacttcaagaactctgtagcaccgcctacatacctcgctctgctaatcctgttaccagtggctgctgccagtggcgataagtcgtgtcttaccgggttggactcaagacgatagttaccggataaggcgcagcggtcgggctgaacggggggttcgtgcacacagcccagcttggagcgaacgacctaca…			used to make [4101] & [4364]
3704		plasmid	DR274 5' arm QUAS 5X	QUAS 5X in a GG SapI TGG GCG assembly vector	Nonet, 2020	1981	TGGGCCTTTCTTCGGTAGAAAATCAAAGGATCTTCttgagatcctttttttctgcgcgtaatctgctgcttgcaaacaaaaaaaccaccgctaccagcggtggtttgtttgccggatcaagagctaccaactctttttccgaggtaactggcttcagcagagcgcagataccaaatactgttcttctagtgtagccgtagttaggccaccacttcaagaactctgtagcaccgcctacatacctcgctctgctaatcctgttaccagtggctgctgccagtggcgataagtcgtgtcttaccgggttggactcaagacgatagttaccggataaggcgcagcggtcgggctgaacggggggttcgtgcacacagcccagcttggagcgaacgacctaca…			used to make [4357], [4358], & [4359]
3706		plasmid	DR274 CT ∆pes-10	pes-10 basal promoter in a GG SapI GCG ATG assembly vector	Nonet, 2020	2084	TTTAGCTTCCTTAGCTCCTGAAAATCTCGATAACTCAAAAAATACGCCCGGTAGTGATCTTATTTCATTATGGTGAAAgttggaacctcttacgtgccGATCAAGTCAAAAGCCTCCGGTCGGAGGCTTTTGACTTTCTGCTATGGAGGTCAGGTATGATTTttGAATTCGCTCTTCggcgtgatcgattttttgcaaattacgagcgttgtagggggcggagcgataggtcctataggttttggtatatcatcattcattcattcattggtacattcatttacccaccttcctctttctgagcttctctggagttctgtgcttcctttttcccttatctttatactgtaatttttaactttcagccggtagaaaaATGaGAAGAGCAAGCTTGGATCG…			used to make [4237], [4669], & [4674]
3724	154112	plasmid	pLF3FShC tetO 7X ∆pes-10 GFP-C1	tetO 7X pes-10 basal promoter driving GFP-C1 with the tbb-2 3' UTR in an RMCE integration vector	Nonet, 2020	9491	GAAGTTCCTATTCtctagaaaGTATAGGAACTTCATGAAAAAGCCTGAACTCACCGCGACGTCTGTCGAGAAGTTTCTGATCGAAAAGTTCGACAGCGTCTCCGACCTGATGCAGCTCTCGGAGGGCGAAGAATCTCGTGCTTTCAGCTTCGATGTAGGAGGGCGTGGATATGTCCTGCGGGTAAATAGCTGCGCCGATGGTTTCTACAAAGATCGTTATGTTTATCGGCACTTTGCATCGGCCGCGCTCCCGATTCCGGAAGTGCTTGACATTGGGGAATTCAGCGAGAGCCTGACCTATTGCATCTCCCGCCGTGCACAGGGTGTCACGTTGCAAGACCTGCCTGAAACCGAACTGCCCGCTGTTCTGCAGCCGGTCGCGGAGGCCATGGATGCGAT…			used to make [3771] & [3772]
3725		plasmid	pLF3FShC UAS 11X ∆pes-10 GFP-C1	UAS 11X pes-10 basal promoter driving GFP-C1 with the tbb-2 3' UTR in an RMCE integration vector	Nonet, 2020	9532	GAAGTTCCTATTCtctagaaaGTATAGGAACTTCATGAAAAAGCCTGAACTCACCGCGACGTCTGTCGAGAAGTTTCTGATCGAAAAGTTCGACAGCGTCTCCGACCTGATGCAGCTCTCGGAGGGCGAAGAATCTCGTGCTTTCAGCTTCGATGTAGGAGGGCGTGGATATGTCCTGCGGGTAAATAGCTGCGCCGATGGTTTCTACAAAGATCGTTATGTTTATCGGCACTTTGCATCGGCCGCGCTCCCGATTCCGGAAGTGCTTGACATTGGGGAATTCAGCGAGAGCCTGACCTATTGCATCTCCCGCCGTGCACAGGGTGTCACGTTGCAAGACCTGCCTGAAACCGAACTGCCCGCTGTTCTGCAGCCGGTCGCGGAGGCCATGGATGCGAT…			Fig. 2, S2
3727	154115	plasmid	pLF3FShC lexO 5X ∆pes-10 GFP-C1	lexO 5X pes-10 basal promoter driving GFP-C1 with the tbb-2 3' UTR in an RMCE integration vector	Nonet, 2020	9321	GAAGTTCCTATTCtctagaaaGTATAGGAACTTCATGAAAAAGCCTGAACTCACCGCGACGTCTGTCGAGAAGTTTCTGATCGAAAAGTTCGACAGCGTCTCCGACCTGATGCAGCTCTCGGAGGGCGAAGAATCTCGTGCTTTCAGCTTCGATGTAGGAGGGCGTGGATATGTCCTGCGGGTAAATAGCTGCGCCGATGGTTTCTACAAAGATCGTTATGTTTATCGGCACTTTGCATCGGCCGCGCTCCCGATTCCGGAAGTGCTTGACATTGGGGAATTCAGCGAGAGCCTGACCTATTGCATCTCCCGCCGTGCACAGGGTGTCACGTTGCAAGACCTGCCTGAAACCGAACTGCCCGCTGTTCTGCAGCCGGTCGCGGAGGCCATGGATGCGAT…			Fig. 2
3751		plasmid	DR274 SEC-3' arm act-4 3'	act-4 3' UTR in a GG SapI AAG GTA assembly vector	Nonet, 2020	2479	gAAGTAAattttttgccccttccacccacaacgctcaaaagaagttcgtattatcccgcaacccatccagaccatccttttacattttttttattttctcttttttttttcttcaccctctccgtgtacattgctagtaatagttccaacttctctagccgactgcattatgcttcccattctcacccaaatcttcattggtaacttctcttgtatttgttcaatactattccggtagtaatctaggcatgtataactaggttctctgtgtatctttggtttgaagttgaggtttaatgcaatcacttttgttgttgtaccctattactgccgatgacccccattttctcattacaaaattgacattttaaaccattttttctctgaatcatgctcatt…			used to make [3864], [4075], [4086], [4090], [4091], [4092], [4093], [4094], [4810], & [4953]
3760		plasmid	DR274 SEC-3' arm unc-54 3'	unc-54 3' UTR in a GG SapI AAG GTA assembly vector	Dour & Nonet, 2021	2294	gAAGTGAAGCTCCGCATCGGCCGCTGTCATCAGATCGCCATCTCGCGCCCGTGCCTCTGACTTCTAAgtccaattactcttcaacatccctacatgctctttctccctgtgctcccaccccctatttttgttattatcaaaaaacttctcttaatttctttgttttttagcttcttttaagtcacctctaacaatgaaattgtgtagattcaaaaatagaattaattcgtaataaaaagtcgaaaaaaattgtgctccctccccccattaataataattctatcccaaaatctacacaatgttctgtgtacacttcttatgttttttacttctgataaatttttttgaaacatcatagaaaaaaccgcacacaaaataccttatcatatgttacgtttc…			used to make [4809], [4839], & [4842]
3766		plasmid	DR274 SEC-3' arm let-858 3'	let-858 3' UTR in a GG SapI AAG GTA assembly vector	Dour & Nonet, 2021	2300	gAAGTGAattttcaaattttaaatactgaatatttgttttttttcctattatttatttattctctttgtgttttttttcttgctttctaaaaaattaattcaatccaaatctaaacatttttttttctctttccgtctcccaattcgtattccgctcctctcatctgaacacaatgtgcaagtttatttatcttctcgctttcatttcattaggacgtggggggaattggtggaagggggaaacacacaaaaggatgatggaaatgaaataaggacacacaatatgcaacaacattcaattcagaaatatggaggaaggtttaaaagaaaacataaaaatatatagaggaggaaggaaaactagtaaaaaataagcaaagaaattaggcgaacgatgag…			used to make [4782], [4812], [4833], [4840], & [4843]
3767		plasmid	DR274 CT ∆mec-7	mec-7 basal promoter in a GG SapI GCG ATG assembly vector	Nonet, 2020	2040	gttggaacctcttacgtgccGATCAAGTCAAAAGCCTCCGGTCGGAGGCTTTTGACTTTCTGCTATGGAGGTCAGGTATGATTTttGAATTCGCTCTTCgGCGagatgtgactcctcccattattcgtcttgagtcgcatcttttgtcttggtccgttgtcagtcgagcctcaaggcagccgttccgccagtgatcgcctgctaagaagttgtaggtgtagaggaagaaacgtcgggtccaaatttcaagcaacATGaGAAGAGCAAGCTTGGATCGACGAGAGCAGCGCGACTGGATCTGTCGCCCGTCTCAAACGCAACCCTCCGGCGGTCGCATATCATTCAGGACGAGCCTCAGACTCCAGCGTAACTGGACTGCAATCAACTCACTGGCTCACC…			used to make [4011], [4012], [4146], [4201], [4276], [4277], [4421], [4423], [4424], [4651], [4652], [4657], [4658], [4721], [4731], [4732], [4733], [4876], [4877], [4878], & [4881]
3770		plasmid	DR274 5' arm tetO 7X	tetO 7X in a GG SapI TGG GCG assembly vector	Nonet, 2020	2173	TGGGCCTTTCTTCGGTAGAAAATCAAAGGATCTTCttgagatcctttttttctgcgcgtaatctgctgcttgcaaacaaaaaaaccaccgctaccagcggtggtttgtttgccggatcaagagctaccaactctttttccgaggtaactggcttcagcagagcgcagataccaaatactgttcttctagtgtagccgtagttaggccaccacttcaagaactctgtagcaccgcctacatacctcgctctgctaatcctgttaccagtggctgctgccagtggcgataagtcgtgtcttaccgggttggactcaagacgatagttaccggataaggcgcagcggtcgggctgaacggggggttcgtgcacacagcccagcttggagcgaacgacctaca…			used to make [4058], [4073], [4391], [4392], [4393], [4487], [4488], [4489], [4490], [4828], [4829], [4830], [4831], [4832], [4833], [5030], & [5031]
3771		plasmid	DR274 5' arm tetO 4X	tetO 4X in a GG SapI TGG GCG assembly vector	this study	2065	TGGGCCTTTCTTCGGTAGAAAATCAAAGGATCTTCttgagatcctttttttctgcgcgtaatctgctgcttgcaaacaaaaaaaccaccgctaccagcggtggtttgtttgccggatcaagagctaccaactctttttccgaggtaactggcttcagcagagcgcagataccaaatactgttcttctagtgtagccgtagttaggccaccacttcaagaactctgtagcaccgcctacatacctcgctctgctaatcctgttaccagtggctgctgccagtggcgataagtcgtgtcttaccgggttggactcaagacgatagttaccggataaggcgcagcggtcgggctgaacggggggttcgtgcacacagcccagcttggagcgaacgacctaca…			used to make [4012]
3772		plasmid	DR274 5' arm tetO 2X	tetO 2X in a GG SapI TGG GCG assembly vector	this study	1993	TGGGCCTTTCTTCGGTAGAAAATCAAAGGATCTTCttgagatcctttttttctgcgcgtaatctgctgcttgcaaacaaaaaaaccaccgctaccagcggtggtttgtttgccggatcaagagctaccaactctttttccgaggtaactggcttcagcagagcgcagataccaaatactgttcttctagtgtagccgtagttaggccaccacttcaagaactctgtagcaccgcctacatacctcgctctgctaatcctgttaccagtggctgctgccagtggcgataagtcgtgtcttaccgggttggactcaagacgatagttaccggataaggcgcagcggtcgggctgaacggggggttcgtgcacacagcccagcttggagcgaacgacctaca…			used to make [4011]
3774	154117	plasmid	pLF3FShC tetO 7X ∆mec-7 GFP-C1	RMCE vector containing the tetO 7X enhancer and a mec-7 basal promoter driving expression of GFP-C1	Nonet, 2020	9451	GAAGTTCCTATTCtctagaaaGTATAGGAACTTCATGAAAAAGCCTGAACTCACCGCGACGTCTGTCGAGAAGTTTCTGATCGAAAAGTTCGACAGCGTCTCCGACCTGATGCAGCTCTCGGAGGGCGAAGAATCTCGTGCTTTCAGCTTCGATGTAGGAGGGCGTGGATATGTCCTGCGGGTAAATAGCTGCGCCGATGGTTTCTACAAAGATCGTTATGTTTATCGGCACTTTGCATCGGCCGCGCTCCCGATTCCGGAAGTGCTTGACATTGGGGAATTCAGCGAGAGCCTGACCTATTGCATCTCCCGCCGTGCACAGGGTGTCACGTTGCAAGACCTGCCTGAAACCGAACTGCCCGCTGTTCTGCAGCCGGTCGCGGAGGCCATGGATGCGAT…			Fig. 1, 3
3777		plasmid	DR274 3' arm tbb-2 3'	tbb-2 3' UTR in a GG SapI ACG GTA assembly vector	Nonet, 2020	2219	TGGGCCTTTCTTCGGTAGAAAATCAAAGGATCTTCttgagatcctttttttctgcgcgtaatctgctgcttgcaaacaaaaaaaccaccgctaccagcggtggtttgtttgccggatcaagagctaccaactctttttccgaggtaactggcttcagcagagcgcagataccaaatactgttcttctagtgtagccgtagttaggccaccacttcaagaactctgtagcaccgcctacatacctcgctctgctaatcctgttaccagtggctgctgccagtggcgataagtcgtgtcttaccgggttggactcaagacgatagttaccggataaggcgcagcggtcgggctgaacggggggttcgtgcacacagcccagcttggagcgaacgacctaca…			used to make [4143] & [4251]
3795		synthetic DNA	QUAS 5X pes-10	QUAS 5X pes-10 promoter	this study	479	GGTCTCagTGGatgaccatgattacgccaagcttgcatgcGGATCCGGGTAAgCGCTTATCCTCGGATAAACGATTATCCTCACGGGTAATCGCTTATCCGCTCGGGTAAACGCTTATCCTCGGGTAATCaCTTATCCTTAAGCTTGATATCCCTGCAGGATCGATTTTTTGCAAATTACGAGCGTTGTAGGGGGCGGAgCGATAGGTCCTATAGGTTTTgGTATATCATCATTCATTCATTCATTGGTACATTCATTTACCCACCTTCCTCTTTCTGAGCTTCTCTGGAGTTCTGTGCTTCCTTTTTCCCTTATCTTTATACTGTAATTTTTAACTTTCAGggcgcgcctctagaggatccccgggattggccaaaggacccaaaggtatgtttcgaa…			used to make [3797]
3797		plasmid	DR274 5' arm-CT QUAS 5X ∆pes-10	QUAS 5X pes-10 basal promoter in a GG SapI TGG ATG assembly vector	this study	2346	gttggaacctcttacgtgccGATCAAGTCAAAAGCCTCCGGTCGGAGGCTTTTGACTTTCTGCTATGGAGGTCAGGTATGATTTttGAATTCGCTCTTCgTGGatgaccatgattacgccaagcttgcatgcGGATCCGGGTAAgCGCTTATCCTCGGATAAACGATTATCCTCACGGGTAATCGCTTATCCGCTCGGGTAAACGCTTATCCTCGGGTAATCaCTTATCCTTAAGCTTGATATCCCTGCAGGATCGATTTTTTGCAAATTACGAGCGTTGTAGGGGGCGGAgCGATAGGTCCTATAGGTTTTgGTATATCATCATTCATTCATTCATTGGTACATTCATTTACCCACCTTCCTCTTTCTGAGCTTCTCTGGAGTTCTGTGCTTCCTTTT…			used to make [3801]
3801		plasmid	pLF3FShC QUAS 5X GFP-C1	synthetic QUAS 5X promoter driving GFP-C1 in an RMCE vector	this study	9470	GAAGTTCCTATTCtctagaaaGTATAGGAACTTCATGAAAAAGCCTGAACTCACCGCGACGTCTGTCGAGAAGTTTCTGATCGAAAAGTTCGACAGCGTCTCCGACCTGATGCAGCTCTCGGAGGGCGAAGAATCTCGTGCTTTCAGCTTCGATGTAGGAGGGCGTGGATATGTCCTGCGGGTAAATAGCTGCGCCGATGGTTTCTACAAAGATCGTTATGTTTATCGGCACTTTGCATCGGCCGCGCTCCCGATTCCGGAAGTGCTTGACATTGGGGAATTCAGCGAGAGCCTGACCTATTGCATCTCCCGCCGTGCACAGGGTGTCACGTTGCAAGACCTGCCTGAAACCGAACTGCCCGCTGTTCTGCAGCCGGTCGCGGAGGCCATGGATGCGAT…			used to make [4334], [4335], & [4336]
3821		plasmid	DR274 FP tetRiS-L-QF	tetR- linker QF gene in a GG SapI ATG AAG assembly vector	Nonet, 2020	3098	TGGGCCTTTCTTCGGTAGAAAATCAAAGGATCTTCttgagatcctttttttctgcgcgtaatctgctgcttgcaaacaaaaaaaccaccgctaccagcggtggtttgtttgccggatcaagagctaccaactctttttccgaggtaactggcttcagcagagcgcagataccaaatactgttcttctagtgtagccgtagttaggccaccacttcaagaactctgtagcaccgcctacatacctcgctctgctaatcctgttaccagtggctgctgccagtggcgataagtcgtgtcttaccgggttggactcaagacgatagttaccggataaggcgcagcggtcgggctgaacggggggttcgtgcacacagcccagcttggagcgaacgacctaca…			used to make [3864], [3917], [4075], & [4086]
3823	154123	plasmid	pLF3FShC mec-4p tetR-L-QF act-4 3'	mec-4 promoter driving tetR-linker-QF in an RMCE vector	Nonet, 2020	10251	GAAGTTCCTATTCtctagaaaGTATAGGAACTTCATGAAAAAGCCTGAACTCACCGCGACGTCTGTCGAGAAGTTTCTGATCGAAAAGTTCGACAGCGTCTCCGACCTGATGCAGCTCTCGGAGGGCGAAGAATCTCGTGCTTTCAGCTTCGATGTAGGAGGGCGTGGATATGTCCTGCGGGTAAATAGCTGCGCCGATGGTTTCTACAAAGATCGTTATGTTTATCGGCACTTTGCATCGGCCGCGCTCCCGATTCCGGAAGTGCTTGACATTGGGGAATTCAGCGAGAGCCTGACCTATTGCATCTCCCGCCGTGCACAGGGTGTCACGTTGCAAGACCTGCCTGAAACCGAACTGCCCGCTGTTCTGCAGCCGGTCGCGGAGGCCATGGATGCGAT…			Fig. 1
3837		plasmid	DR274 5' arm-CT rab-3p long	long rab-3 promoter in a GG SapI TGG ATG assembly vector	Knoebel, Dour, & Nonet, 2023	6271	gttggaacctcttacgtgccGATCAAGTCAAAAGCCTCCGGTCGGAGGCTTTTGACTTTCTGCTATGGAGGTCAGGTATGATTTttGAATTCGCTCTTCgTGGcgagttttgactggctttcaaaaactgagtgattactaattatttttgaaaaaattaacagttgtgatatgatatttagacatttttgcaatatataatttgtttgaaaaaaaaacattttttaatggtcttcgaagctataatagtttttcgtaaaattttaaataaaacagctgacagatatccacattcaataattgaaagtatgcagttctctttttttttgtcaaatagaaaaaaagtaacagatggtcagatataatctaggttaatctgactctggtcatcgatgaact…			used to make [3864]
3844		plasmid	DR274 AAC TGG - BsaI	GG BsaI vector for creating SapI AAC TGG assembly clones	Knoebel, Dour, & Nonet, 2023	1914	TGGGCCTTTCTTCGGTAGAAAATCAAAGGATCTTCttgagatcctttttttctgcgcgtaatctgctgcttgcaaacaaaaaaaccaccgctaccagcggtggtttgtttgccggatcaagagctaccaactctttttccgaggtaactggcttcagcagagcgcagataccaaatactgttcttctagtgtagccgtagttaggccaccacttcaagaactctgtagcaccgcctacatacctcgctctgctaatcctgttaccagtggctgctgccagtggcgataagtcgtgtcttaccgggttggactcaagacgatagttaccggataaggcgcagcggtcgggctgaacggggggttcgtgcacacagcccagcttggagcgaacgacctaca…			used to make [3851], [3953], [4061], [4271], & [4335]
3848		plasmid	pLF3FShC2	modified RMCE vector for adding sequences upstream of a TGG 5' site	this study	7858	GAAGTTCCTATTCtctagaaaGTATAGGAACTTCATGAAAAAGCCTGAACTCACCGCGACGTCTGTCGAGAAGTTTCTGATCGAAAAGTTCGACAGCGTCTCCGACCTGATGCAGCTCTCGGAGGGCGAAGAATCTCGTGCTTTCAGCTTCGATGTAGGAGGGCGTGGATATGTCCTGCGGGTAAATAGCTGCGCCGATGGTTTCTACAAAGATCGTTATGTTTATCGGCACTTTGCATCGGCCGCGCTCCCGATTCCGGAAGTGCTTGACATTGGGGAATTCAGCGAGAGCCTGACCTATTGCATCTCCCGCCGTGCACAGGGTGTCACGTTGCAAGACCTGCCTGAAACCGAACTGCCCGCTGTTCTGCAGCCGGTCGCGGAGGCCATGGATGCGAT…			used to make [3864], [4004], [4073], [4101], [4276], [4277], [4364], [4358], [4359], [4364], [4421], [4423], & [4424]
3851		plasmid	DR274 AAC TGG rps-13 3' UTR	rps-13 3' UTR in a GG SapI AAC TGG assembly vector	Knoebel, Dour, & Nonet, 2023	2209	TGGGCCTTTCTTCGGTAGAAAATCAAAGGATCTTCttgagatcctttttttctgcgcgtaatctgctgcttgcaaacaaaaaaaccaccgctaccagcggtggtttgtttgccggatcaagagctaccaactctttttccgaggtaactggcttcagcagagcgcagataccaaatactgttcttctagtgtagccgtagttaggccaccacttcaagaactctgtagcaccgcctacatacctcgctctgctaatcctgttaccagtggctgctgccagtggcgataagtcgtgtcttaccgggttggactcaagacgatagttaccggataaggcgcagcggtcgggctgaacggggggttcgtgcacacagcccagcttggagcgaacgacctaca…			used to make [3864]
3854		plasmid	DR274 CAA TGG - BsaI	GG BsaI vector for creating SapI CAA TGG assembly clones	Knoebel, Dour, & Nonet, 2023	1914	TGGGCCTTTCTTCGGTAGAAAATCAAAGGATCTTCttgagatcctttttttctgcgcgtaatctgctgcttgcaaacaaaaaaaccaccgctaccagcggtggtttgtttgccggatcaagagctaccaactctttttccgaggtaactggcttcagcagagcgcagataccaaatactgttcttctagtgtagccgtagttaggccaccacttcaagaactctgtagcaccgcctacatacctcgctctgctaatcctgttaccagtggctgctgccagtggcgataagtcgtgtcttaccgggttggactcaagacgatagttaccggataaggcgcagcggtcgggctgaacggggggttcgtgcacacagcccagcttggagcgaacgacctaca…			used to make [4273], [4336], [4639], & [4713]
3855		plasmid	DR274 AAC CAA - BsaI	GG BsaI vector for creating SapI AAC CAA assembly clones	Knoebel, Dour, & Nonet, 2023	1914	TGGGCCTTTCTTCGGTAGAAAATCAAAGGATCTTCttgagatcctttttttctgcgcgtaatctgctgcttgcaaacaaaaaaaccaccgctaccagcggtggtttgtttgccggatcaagagctaccaactctttttccgaggtaactggcttcagcagagcgcagataccaaatactgttcttctagtgtagccgtagttaggccaccacttcaagaactctgtagcaccgcctacatacctcgctctgctaatcctgttaccagtggctgctgccagtggcgataagtcgtgtcttaccgggttggactcaagacgatagttaccggataaggcgcagcggtcgggctgaacggggggttcgtgcacacagcccagcttggagcgaacgacctaca…			used to make [4062], [4275], [4334], & [4640]
3863		plasmid	DR274 5' arm-CT mec-4Sp	mec-4 synthetic promoter in a GG SapI TGG ATG assembly vector	Nonet, 2023	2548	gTGGggttccggagcagttcaagacaacttttgtcaatggcaagctagtcactgtcgtctcggacatttgctaaatcttctcacgtcataaccttatttttcaacttcatgaactatcccctcgaacttttttatttgtccctgtctacaattctttataagcaattgagacacactttgctttattaaataataccgattttgttttgtatatgcattgactggtgctcaactatttttattgaaaaaattactttttactgtctcgtcgaataaaagtgatcccttccaaaaaatagttattcatgtttgaaggtttgtgatcgtagaacaattgcaccgaatgtagtgtaaaaaaaattccagaatgttcaaatacatttccaccctcaccagaac…			used to make [4075] & [4086]
3864		plasmid	pLF3FShC2 rps-13t rab-3pl tetR-L-QF	rab-3 long promoter driving tetR-L-QF in an RMCE integration vector	this study	14329	GAAGTTCCTATTCtctagaaaGTATAGGAACTTCATGAAAAAGCCTGAACTCACCGCGACGTCTGTCGAGAAGTTTCTGATCGAAAAGTTCGACAGCGTCTCCGACCTGATGCAGCTCTCGGAGGGCGAAGAATCTCGTGCTTTCAGCTTCGATGTAGGAGGGCGTGGATATGTCCTGCGGGTAAATAGCTGCGCCGATGGTTTCTACAAAGATCGTTATGTTTATCGGCACTTTGCATCGGCCGCGCTCCCGATTCCGGAAGTGCTTGACATTGGGGAATTCAGCGAGAGCCTGACCTATTGCATCTCCCGCCGTGCACAGGGTGTCACGTTGCAAGACCTGCCTGAAACCGAACTGCCCGCTGTTCTGCAGCCGGTCGCGGAGGCCATGGATGCGAT…			used to make [3907]
3896		plasmid	DR274 5' arm-CT ehs-1p	ehs-1 promoter in a GG SapI TGG ATG assembly vector	Nonet, 2023	2239	gttggaacctcttacgtgccGATCAAGTCAAAAGCCTCCGGTCGGAGGCTTTTGACTTTCTGCTATGGAGGTCAGGTATGATTTttGAATTCGCTCTTCGTGGtagagggccgggactcttcccactgaaactcaatacttttgcatatttcacattctcttcctccgttggttcaccaaaagagaaaagggaccgacatgaaaaggaaacgaaagcttaaaagagacggaaaatcgatgtactagagtgctcggaagtagttgagaggcgcagagagagagctttcattcagaagacacacgacgttattcctcgcaacgccttcttctttttaacaatcttcaatacattttagtgaactttcttttatttctgtttcatttaaaaatagtcttaaa…			used to make [4090]
3899		plasmid	DR274 5' arm-CT tetO 7X ∆mec-7	tetO 7X mec-7 basal promoter in a GG SapI TGG ATG assembly vector	Knoebel, Dour, & Nonet, 2023	2327	gttggaacctcttacgtgccGATCAAGTCAAAAGCCTCCGGTCGGAGGCTTTTGACTTTCTGCTATGGAGGTCAGGTATGATTTttGAATTCGCTCTTCGTGGcttgcatgcccgtcttcactcgagtttactccctatcagtgatagagaacgtatgaagagtttactccctatcagtgatagagaacgtatgcagactttactccctatcagtgatagagaacgtataaggagtttactccctatcagtgatagagaacgtatgaccagtttactccctatcagtgatagagaacgtatctacagtttactccctatcagtgatagagaacgtatatccagtttactccctatcagtgatagagaacgtatgtcgaggtaggcgtGCGagatgtgac…			used to make [4056], [4077], [4079], [4839], & [4841]
3905		plasmid	DR274 5' arm-CT phat-5p	phat-5 promoter in a GG SapI TGG ATG assembly vector	this study	2208	gttggaacctcttacgtgccGATCAAGTCAAAAGCCTCCGGTCGGAGGCTTTTGACTTTCTGCTATGGAGGTCAGGTATGATTTttGAATTCGCTCTTCgTGGcaccctctcaacaccatcaatactattttcacaccacacaaggcgataaatcatcacatgctccgatattcattgtttccaacgcccgccaaactgatacagtttgcacctgttcaaattgtcgaaagatgaaatagttcacgagatggttagaaactgagacagtttcattgtattctaaaagagactaacagatgaatattaacagatgtgcaaatcttttaaggctatatggaaattagtataaaagaggaaaaaataatggtgaaattcacagctcagaagttcttcttctc…			used to make [3917]
3907		plasmid	DR274 SEC-3' arm act-4 3' FRT13	act-4 3' UTR followed by an FRT13 site in a GG SapI AAG GTA assembly vector	this study	2516	TGGGCCTTTCTTCGGTAGAAAATCAAAGGATCTTCttgagatcctttttttctgcgcgtaatctgctgcttgcaaacaaaaaaaccaccgctaccagcggtggtttgtttgccggatcaagagctaccaactctttttccgaggtaactggcttcagcagagcgcagataccaaatactgttcttctagtgtagccgtagttaggccaccacttcaagaactctgtagcaccgcctacatacctcgctctgctaatcctgttaccagtggctgctgccagtggcgataagtcgtgtcttaccgggttggactcaagacgatagttaccggataaggcgcagcggtcgggctgaacggggggttcgtgcacacagcccagcttggagcgaacgacctaca…			used to make [3917]
3909		plasmid	DR274 5' arm tetO 7X ∆mec-7	tetO 7X mec-7 basal promoter in a GG SapI TGG GCG assembly vector	Knoebel, Dour, & Nonet, 2023	2330	gttggaacctcttacgtgccGATCAAGTCAAAAGCCTCCGGTCGGAGGCTTTTGACTTTCTGCTATGGAGGTCAGGTATGATTTttGAATTCGCTCTTCGTGGcttgcatgcccgtcttcactcgagtttactccctatcagtgatagagaacgtatgaagagtttactccctatcagtgatagagaacgtatgcagactttactccctatcagtgatagagaacgtataaggagtttactccctatcagtgatagagaacgtatgaccagtttactccctatcagtgatagagaacgtatctacagtttactccctatcagtgatagagaacgtatatccagtttactccctatcagtgatagagaacgtatgtcgaggtaggcgtGCGagatgtgac…			used to make [4004]
3911		plasmid	DR274 NT scarlet	scarlet-I-C1 in a GG SapI GGT ACG assembly vector	Nonet, 2023	2738	TGGGCCTTTCTTCGGTAGAAAATCAAAGGATCTTCttgagatcctttttttctgcgcgtaatctgctgcttgcaaacaaaaaaaccaccgctaccagcggtggtttgtttgccggatcaagagctaccaactctttttccgaggtaactggcttcagcagagcgcagataccaaatactgttcttctagtgtagccgtagttaggccaccacttcaagaactctgtagcaccgcctacatacctcgctctgctaatcctgttaccagtggctgctgccagtggcgataagtcgtgtcttaccgggttggactcaagacgatagttaccggataaggcgcagcggtcgggctgaacggggggttcgtgcacacagcccagcttggagcgaacgacctaca…			used to make [4140] & [4251]
3917		plasmid	pLF3FShC phat-5p tetR-L-QF act-4 3' FRT13	phat-5 promoter driving tetR-L-QF in an RMCE vector with an FRT13 site at the 3' end	this study	9977	GAAGTTCCTATTCtctagaaaGTATAGGAACTTCATGAAAAAGCCTGAACTCACCGCGACGTCTGTCGAGAAGTTTCTGATCGAAAAGTTCGACAGCGTCTCCGACCTGATGCAGCTCTCGGAGGGCGAAGAATCTCGTGCTTTCAGCTTCGATGTAGGAGGGCGTGGATATGTCCTGCGGGTAAATAGCTGCGCCGATGGTTTCTACAAAGATCGTTATGTTTATCGGCACTTTGCATCGGCCGCGCTCCCGATTCCGGAAGTGCTTGACATTGGGGAATTCAGCGAGAGCCTGACCTATTGCATCTCCCGCCGTGCACAGGGTGTCACGTTGCAAGACCTGCCTGAAACCGAACTGCCCGCTGTTCTGCAGCCGGTCGCGGAGGCCATGGATGCGAT…			Fig. S4
3928		plasmid	DR274 SEC gpd-2/3	gpd2-3 in a GG SapI AAG GGT assembly vector	Knoebel, Dour, & Nonet, 2023	2140	TGGGCCTTTCTTCGGTAGAAAATCAAAGGATCTTCttgagatcctttttttctgcgcgtaatctgctgcttgcaaacaaaaaaaccaccgctaccagcggtggtttgtttgccggatcaagagctaccaactctttttccgaggtaactggcttcagcagagcgcagataccaaatactgttcttctagtgtagccgtagttaggccaccacttcaagaactctgtagcaccgcctacatacctcgctctgctaatcctgttaccagtggctgctgccagtggcgataagtcgtgtcttaccgggttggactcaagacgatagttaccggataaggcgcagcggtcgggctgaacggggggttcgtgcacacagcccagcttggagcgaacgacctaca…			used to make [4251]
3932		plasmid	DR274 5' arm-CT dpy-7p	dpy-7 promoter in a GG SapI TGG ATG assembly vector	Nonet, 2023	2235	gttggaacctcttacgtgccGATCAAGTCAAAAGCCTCCGGTCGGAGGCTTTTGACTTTCTGCTATGGAGGTCAGGTATGATTTttGAATTCGCTCTTCgTGGATCTCATTCCACGATTTCTCGCAACACATCCCTTATATTCTACATTCCTTTTTCGCATGTACTCATCTCTTCTCGTTTGGAATCTTTTCTTATCTCCGATAATTGGGTTATTGTGTCGATAAAGACTGACCTATTTAACAGATACACTCCACCTTCATCCACCTTTCCGTTTTCTACAATCCATGTTCTTTTCAATTCAATTCATTTATCACACCCTGTTCTTTTTTTTAATTTATATTTTTTGTCAAAACTCGAAATATTTTTTCTACCGCTCTGTGAAAACAAAACAAGATTCA…			used to make [4094]
3938		plasmid	DR274 5' arm-CT cup-4p	cup-4 promoter in a GG SapI TGG ATG assembly vector	Nonet, 2023	4207	gttggaacctcttacgtgccGATCAAGTCAAAAGCCTCCGGTCGGAGGCTTTTGACTTTCTGCTATGGAGGTCAGGTATGATTTttGAATTCGCTCTTCGTGGATTGTACCTCTCCTAACCCCATTCCAATTCTTGCCAGGAAAACTGAAAAATATCCGAAATGTGTCGCCAAAAAAGGAGTTATTACGGTAACCAAAATGTAAAGGGCTACAGAAATTTGAAGTACGTGACGTGGAGAAAAGCGCTCAATGAAGAACATTGAAGGGAGTACTGTAATAAGTGATCCCCAAAATGTTCCAGAAAATATAAGATTTTGTTCGTAGCTGTTCCATACCAATTCACCCTGAAATTAGAATATACCAGATTCAAATAAGTAAAACAATTGTACCCCATAATCA…			used to make [4092]
3947		plasmid	DR274 5' arm-CT nhx-2p	nhx-2 promoter in a GG SapI TGG ATGG assembly vector	Nonet, 2023	3470	gttggaacctcttacgtgccGATCAAGTCAAAAGCCTCCGGTCGGAGGCTTTTGACTTTCTGCTATGGAGGTCAGGTATGATTTttGAATTCGCTCTTCgTGGCCTTCCAAGTTATTGACAAGTATTAACtgcacttctcataaaaatttttcaaatagatctatttagtctggaataggaatacttttggcaattttcttgagaatcatagaagacgaatttctgaactgctctttgtgaagccacgcccatatattggcatttttgtatccaattttttgtagagtacctgaatcattatcactacatctgctaaacaatatatggaagttctatgagaggtgaaaggtaaatcatataacaactgtaataacatagaaatgattgtagtatatttc…			used to make [4091]
3953		plasmid	DR274 AAC TGG rps-12p hyg F24 rps13t F13r	rps-12 promoter driving hygR, FRT24, rps-13 terminator, and FRT13 in a GG SapI AAC TGG assembly vector	this study	2580	TGGGCCTTTCTTCGGTAGAAAATCAAAGGATCTTCttgagatcctttttttctgcgcgtaatctgctgcttgcaaacaaaaaaaccaccgctaccagcggtggtttgtttgccggatcaagagctaccaactctttttccgaggtaactggcttcagcagagcgcagataccaaatactgttcttctagtgtagccgtagttaggccaccacttcaagaactctgtagcaccgcctacatacctcgctctgctaatcctgttaccagtggctgctgccagtggcgataagtcgtgtcttaccgggttggactcaagacgatagttaccggataaggcgcagcggtcgggctgaacggggggttcgtgcacacagcccagcttggagcgaacgacctaca…			used to make [4004]
3969		synthetic DNA	phiCN	N-terminal half of phiC31 synthetic with 3 introns	this study	982	ggtctcagATGGATACTTACGCCGGAGCATACGATCGTCAAAGCAGAGAGCGTGAGAACTCCTCTGCTGCTTCCCCAGCTACCCAACGTTCCGCCAACGAGGACAAGGCCGCCGACCTCCAACGTGAGGTCGAGCGTGACGGAGGACGTTTCCGTTTCGTCGGACACTTCTCCGAGGCCCCAGGAACCTCCGCCTTCGGAACCGCCGAGCGTCCAGAGTTCGAGCGTATCCTCAACGAGTGCCGTGCCGGACGTCTCAACATGATCATCGTCTACGACGTCTCCCGTTTCTCCCGTCTCAAGGTCATGGACGCCATCCCAATCGTCTCCGAGCTCCTCGCCCTCGGAGTCACCATCGTCTCCACCCAAGAGGGAGTCTTCCGTCAAGGAAACGTCATGG…			used to make [3978]
3970		synthetic DNA	phiCC	C-terminal half of phiC31 synthetic with 3 introns	this study	1044	GGTCTCAACCAAGgtaagtttaaacagttcggtactaactaaccatacatatctaaattttcagATCGAGGGATACCGTATCCAACGTGACCCAATCACCCTCCGTCCAGTCGAGCTCGACTGCGGACCAATCATCGAGCCAGCCGAGTGGTACGAGCTCCAAGCCTGGCTCGACGGACGTGGACGTGGAAAGGGACTCTCCCGTGGACAAGCCATCCTCTCCGCCATGGACAAGCTCTACTGCGAGTGCGGAGCCGTCATGACCTCCAAGCGTGGAGAGGAGTCCATCAAGGACTCCTACCGTTGCCGTCGTCGTAAGGTCGTCGACCCATCCGCCCCAGGACAACACGAGGGAACCTGCAACGTCTCCATGGCCGCCCTCGACAAGTTCGTCGCTGA…			used to make [3978]
3978		plasmid	DR274 FP nls-phiC31	nls-phiC31 in a GG SapI ATG AAG assembly vector	this study	3875	TGGGCCTTTCTTCGGTAGAAAATCAAAGGATCTTCttgagatcctttttttctgcgcgtaatctgctgcttgcaaacaaaaaaaccaccgctaccagcggtggtttgtttgccggatcaagagctaccaactctttttccgaggtaactggcttcagcagagcgcagataccaaatactgttcttctagtgtagccgtagttaggccaccacttcaagaactctgtagcaccgcctacatacctcgctctgctaatcctgttaccagtggctgctgccagtggcgataagtcgtgtcttaccgggttggactcaagacgatagttaccggataaggcgcagcggtcgggctgaacggggggttcgtgcacacagcccagcttggagcgaacgacctaca…			used to make [4081]
3979		plasmid	DR274 3' arm let-858 3'	let-858 3' UTR in a GG SapI ACG GTA assembly vector	Knoebel, Dour, & Nonet, 2023	2300	TGGGCCTTTCTTCGGTAGAAAATCAAAGGATCTTCttgagatcctttttttctgcgcgtaatctgctgcttgcaaacaaaaaaaccaccgctaccagcggtggtttgtttgccggatcaagagctaccaactctttttccgaggtaactggcttcagcagagcgcagataccaaatactgttcttctagtgtagccgtagttaggccaccacttcaagaactctgtagcaccgcctacatacctcgctctgctaatcctgttaccagtggctgctgccagtggcgataagtcgtgtcttaccgggttggactcaagacgatagttaccggataaggcgcagcggtcgggctgaacggggggttcgtgcacacagcccagcttggagcgaacgacctaca…			used to make [4004]
3980		plasmid	DR274 NT mNG	mNG in a GG SapI GGT ACG assembly vector	Nonet, 2023	2801	TGGGCCTTTCTTCGGTAGAAAATCAAAGGATCTTCttgagatcctttttttctgcgcgtaatctgctgcttgcaaacaaaaaaaccaccgctaccagcggtggtttgtttgccggatcaagagctaccaactctttttccgaggtaactggcttcagcagagcgcagataccaaatactgttcttctagtgtagccgtagttaggccaccacttcaagaactctgtagcaccgcctacatacctcgctctgctaatcctgttaccagtggctgctgccagtggcgataagtcgtgtcttaccgggttggactcaagacgatagttaccggataaggcgcagcggtcgggctgaacggggggttcgtgcacacagcccagcttggagcgaacgacctaca…			used to make [4069]
3981		plasmid	DR274 3' arm glh-2 3'	glh-2 3' UTR in a GG SapI ACG GTA assembly vector	Knoebel, Dour, & Nonet, 2023	2335	TGGGCCTTTCTTCGGTAGAAAATCAAAGGATCTTCttgagatcctttttttctgcgcgtaatctgctgcttgcaaacaaaaaaaccaccgctaccagcggtggtttgtttgccggatcaagagctaccaactctttttccgaggtaactggcttcagcagagcgcagataccaaatactgttcttctagtgtagccgtagttaggccaccacttcaagaactctgtagcaccgcctacatacctcgctctgctaatcctgttaccagtggctgctgccagtggcgataagtcgtgtcttaccgggttggactcaagacgatagttaccggataaggcgcagcggtcgggctgaacggggggttcgtgcacacagcccagcttggagcgaacgacctaca…			used to make [4081]
3985		plasmid	DR274 5' arm-CT myo-2p	myo-2 promoter in a GG SapI TGG ATG assembly vector	Nonet, 2023	2865	gttggaacctcttacgtgccGATCAAGTCAAAAGCCTCCGGTCGGAGGCTTTTGACTTTCTGCTATGGAGGTCAGGTATGATTTttGAATTCGCTCTTCgTGGcattttatatctgagtagtatcctttgctttaaatgtccataaaactaattttataatcaataaaacaacgtttgtaaatcaactgagtttacaagtagagacattgagggatactttcactatgctaaagtgataatcgaccaaataataacttcactttggtatttattcctgtcttataaatgttatgtatgaattaaattcatatgcatatggctcactctgacaatttttaataatcttccagatcaatattgactaccgatgcgggtggtcttttgctttgaattctgct…			used to make [4093]
4002		plasmid	DR274 SEC gpd-2/3 kozak	gpd-2/3 trans splicing region with a kozak signal in a GG SapI AAG GGT assembly vector	Knoebel, Dour, & Nonet, 2023	2144	TGGGCCTTTCTTCGGTAGAAAATCAAAGGATCTTCttgagatcctttttttctgcgcgtaatctgctgcttgcaaacaaaaaaaccaccgctaccagcggtggtttgtttgccggatcaagagctaccaactctttttccgaggtaactggcttcagcagagcgcagataccaaatactgttcttctagtgtagccgtagttaggccaccacttcaagaactctgtagcaccgcctacatacctcgctctgctaatcctgttaccagtggctgctgccagtggcgataagtcgtgtcttaccgggttggactcaagacgatagttaccggataaggcgcagcggtcgggctgaacggggggttcgtgcacacagcccagcttggagcgaacgacctaca…			used to make [4081]
4004		plasmid	pLF3FShC2 rps-12p F24 rps-13 F13 tetO 7X	RMCE integration clone used as source for 7X tetO sequences	this study	10331	AACaaagcttcccgcgtgcaagtctccgtaaatcgacaaatggcaagcgcgctctatagcacatttcactgtgccgcgactcaaagacatgctgcggagtgatacagaaacatttcatgcttccctcttttccgttgattttcccaattttttcttttctttttttctttttctcaaatcttgaaatatattttgtgaaaacaatattaacgagtcgaaatttctaattttcaggtaagcatcaaggactcttgctgcaaacaacaATGAAGgtaagtttaaacaGAAGTTCCTATTCtatcaagaGTATAGGAACTTCtttcagGCTGCTTCTCTTGTTTCATAAgcattgttctgacaataaatcgttgttgtttcaaataattcttttttgtttta…			used to make [4061], [4062], & [4756]
4011		plasmid	pLF3FShC tetO 2X GFP-C1	tetO 2X operator in front of mec-7 basal promoter driving GFP-C1 in an RMCE integration vector	this study	9271	GAAGTTCCTATTCtctagaaaGTATAGGAACTTCATGAAAAAGCCTGAACTCACCGCGACGTCTGTCGAGAAGTTTCTGATCGAAAAGTTCGACAGCGTCTCCGACCTGATGCAGCTCTCGGAGGGCGAAGAATCTCGTGCTTTCAGCTTCGATGTAGGAGGGCGTGGATATGTCCTGCGGGTAAATAGCTGCGCCGATGGTTTCTACAAAGATCGTTATGTTTATCGGCACTTTGCATCGGCCGCGCTCCCGATTCCGGAAGTGCTTGACATTGGGGAATTCAGCGAGAGCCTGACCTATTGCATCTCCCGCCGTGCACAGGGTGTCACGTTGCAAGACCTGCCTGAAACCGAACTGCCCGCTGTTCTGCAGCCGGTCGCGGAGGCCATGGATGCGAT…			Fig. 1, 2, 4, S1, S2, S4
4012		plasmid	pLF3FShC tetO 4X GFP-C1	tetO 4X operator in front of mec-7 basal promoter driving GFP-C1 in an RMCE integration vector	this study	9343	GAAGTTCCTATTCtctagaaaGTATAGGAACTTCATGAAAAAGCCTGAACTCACCGCGACGTCTGTCGAGAAGTTTCTGATCGAAAAGTTCGACAGCGTCTCCGACCTGATGCAGCTCTCGGAGGGCGAAGAATCTCGTGCTTTCAGCTTCGATGTAGGAGGGCGTGGATATGTCCTGCGGGTAAATAGCTGCGCCGATGGTTTCTACAAAGATCGTTATGTTTATCGGCACTTTGCATCGGCCGCGCTCCCGATTCCGGAAGTGCTTGACATTGGGGAATTCAGCGAGAGCCTGACCTATTGCATCTCCCGCCGTGCACAGGGTGTCACGTTGCAAGACCTGCCTGAAACCGAACTGCCCGCTGTTCTGCAGCCGGTCGCGGAGGCCATGGATGCGAT…			Fig. 1, 2, 4, S1, S2, S4
4037		plasmid	DR274 5' arm-CT mex-5p	mex-5 promoter with a worm Kozak sequence in a GG SapI TGG ATG assembly vector	Nonet, 2023	2390	gttggaacctcttacgtgccGATCAAGTCAAAAGCCTCCGGTCGGAGGCTTTTGACTTTCTGCTATGGAGGTCAGGTATGATTTttGAATTCGCTCTTCgTGGcacaacggcaaaATATCAGTTTTTAAAAAATTAAACCATAAAACAAATAATATAACCCAATTTTTACATCAAACCACAAGAAAAAAATACATTTGGGCCCACGGATAAAGAAATTAAAAAAATACATTTTTTAAAGGCGCACCGAATTAAAATTCATTTGGGTCTTACCGCGTATACCGTACTCCGTTTGTTTGATCATTTTTGTCAGCGCTGGCGGTTGTTTTTTCATTTCATTTCTGCTTCAAAGACGTTTTCTCGAATAATTTTTCGTTTATTCTCTTTTTTAAAATTAATTT…			used to make [4081]
4045		plasmid	DR274 FP tetR-LL-QF	tetR- dual linker QF tet OFF driver in a GG SapI ATG AAG assembly vector	Nonet, 2021a	3140	ttgagatcctttttttctgcgcgtaatctgctgcttgcaaacaaaaaaaccaccgctaccagcggtggtttgtttgccggatcaagagctaccaactctttttccgaggtaactggcttcagcagagcgcagataccaaatactgttcttctagtgtagccgtagttaggccaccacttcaagaactctgtagcaccgcctacatacctcgctctgctaatcctgttaccagtggctgctgccagtggcgataagtcgtgtcttaccgggttggactcaagacgatagttaccggataaggcgcagcggtcgggctgaacggggggttcgtgcacacagcccagcttggagcgaacgacctacaccgaactgagatacctacagcgtgagctatgagaa…			used to make [4090], [4091], [4092], [4093], [4094], [4161], & [4864]
4056		plasmid	DR274 CT tetO 7X ∆mec-7	tetO 7X mec-7 basal promoter in a GG SapI GCG ATG assembly vector	this study	2326	gttggaacctcttacgtgccGATCAAGTCAAAAGCCTCCGGTCGGAGGCTTTTGACTTTCTGCTATGGAGGTCAGGTATGATTTttGAATTCGCTCTTCgGCGctgcatgcccgtcttcactcgagtttactccctatcagtgatagagaacgtatgaagagtttactccctatcagtgatagagaacgtatgcagactttactccctatcagtgatagagaacgtataaggagtttactccctatcagtgatagagaacgtatgaccagtttactccctatcagtgatagagaacgtatctacagtttactccctatcagtgatagagaacgtatatccagtttactccctatcagtgatagagaacgtatgtcgaggtaggcgtGCGagatgtgact…			used to make [4058], [4073], & [4782]
4058		plasmid	pLF3FShC tetO 14X ∆mec-7 GFP-C1	tetO 14X mec-7 basal promoter driving GFP-C1 in an RMCE integration vector	this study	9737	GAAGTTCCTATTCtctagaaaGTATAGGAACTTCATGAAAAAGCCTGAACTCACCGCGACGTCTGTCGAGAAGTTTCTGATCGAAAAGTTCGACAGCGTCTCCGACCTGATGCAGCTCTCGGAGGGCGAAGAATCTCGTGCTTTCAGCTTCGATGTAGGAGGGCGTGGATATGTCCTGCGGGTAAATAGCTGCGCCGATGGTTTCTACAAAGATCGTTATGTTTATCGGCACTTTGCATCGGCCGCGCTCCCGATTCCGGAAGTGCTTGACATTGGGGAATTCAGCGAGAGCCTGACCTATTGCATCTCCCGCCGTGCACAGGGTGTCACGTTGCAAGACCTGCCTGAAACCGAACTGCCCGCTGTTCTGCAGCCGGTCGCGGAGGCCATGGATGCGAT…			Fig. 1, 2, 4, S1, S2, S4
4061		plasmid	DR274 AAC TGG tetO 7X	tetO 7X in a GG SapI AAC TGG assembly vector	this study	2173	TGGGCCTTTCTTCGGTAGAAAATCAAAGGATCTTCttgagatcctttttttctgcgcgtaatctgctgcttgcaaacaaaaaaaccaccgctaccagcggtggtttgtttgccggatcaagagctaccaactctttttccgaggtaactggcttcagcagagcgcagataccaaatactgttcttctagtgtagccgtagttaggccaccacttcaagaactctgtagcaccgcctacatacctcgctctgctaatcctgttaccagtggctgctgccagtggcgataagtcgtgtcttaccgggttggactcaagacgatagttaccggataaggcgcagcggtcgggctgaacggggggttcgtgcacacagcccagcttggagcgaacgacctaca…			used to make [4073] & [4721]
4062		plasmid	DR274 AAC CAA tetO 7X	tetO 7X in a GG SapI AAC CAA assembly vector	this study	2173	TGGGCCTTTCTTCGGTAGAAAATCAAAGGATCTTCttgagatcctttttttctgcgcgtaatctgctgcttgcaaacaaaaaaaccaccgctaccagcggtggtttgtttgccggatcaagagctaccaactctttttccgaggtaactggcttcagcagagcgcagataccaaatactgttcttctagtgtagccgtagttaggccaccacttcaagaactctgtagcaccgcctacatacctcgctctgctaatcctgttaccagtggctgctgccagtggcgataagtcgtgtcttaccgggttggactcaagacgatagttaccggataaggcgcagcggtcgggctgaacggggggttcgtgcacacagcccagcttggagcgaacgacctaca…			used to make [4732] & [4733]
4064		plasmid	DR274 FP nls-GFP-nls	nls-GFP in a GG SapI ATG AAG assembly vector	Nonet, 2023	2849	TGGGCCTTTCTTCGGTAGAAAATCAAAGGATCTTCttgagatcctttttttctgcgcgtaatctgctgcttgcaaacaaaaaaaccaccgctaccagcggtggtttgtttgccggatcaagagctaccaactctttttccgaggtaactggcttcagcagagcgcagataccaaatactgttcttctagtgtagccgtagttaggccaccacttcaagaactctgtagcaccgcctacatacctcgctctgctaatcctgttaccagtggctgctgccagtggcgataagtcgtgtcttaccgggttggactcaagacgatagttaccggataaggcgcagcggtcgggctgaacggggggttcgtgcacacagcccagcttggagcgaacgacctaca…			used to make [4782]
4065		synthetic DNA	attB	synthetic fragment containing sgRNA site	this study	441	aCTAGTGGCTGACATCCAGTAGACGGAGGctCAATTGAAAGTAAATATTCCCTGTGTTTAATTGTTATTGTTGTGGTGGATAATAGATATTTAATCTGCCAAAATGTGTTCTTTTTACATAGCTGATCAATTTCCAGATATATCGAGACTTGATGTCATTCCTGGATGAATCGTCTAATGGTGTTAAACCTGATTTGATTAGTTGTCTCTTTGTCGTATTAGAGTGGATGAGTTCATCCAGTTGTTGAAAAAATGTTCTTATTGTGAAGAAAAACTAATTCGTagaaCCTAGGTGGCGAAGAGCCTGCAggtaaccACGCGttGCatGCTCTTCCGTACGaaatCGGTGCGGGTGCCAGGGCGTGCCCTTGGGCTCCCCGGGCGCGTACTCCACttaaG…			used to make [4071]
4066		synthetic DNA	attP	synthetic fragment containing sgRNA site	this study	458	aCTAGTGGCTGACATCCAGTAGACGGAGGctaccgGTGCCCCAACTGGGGTAACCTTTGAGTTCTCTCAGTTGGGGGagCAATTGTCTAAACATTTTTTGTTGACTTACAATAAATTGTTGATATAATTTATTGTGAAATGGGTATTCTTGAATGATTTGATTTTAACGAAGAGAACGCTGAAATCAACTGAACACCTCGAATTGAGATTTTGGGGATTTTATACCAAGTTATCGACGACGCAAATGGTGCAAACTTTATATTTTCAAATATTCTGGAAGCATTCAATGGTCTTTTAAGAAACGGACAACTCCATTCTTGATATGCAATGTTTTTTAAAAGAAATCTCTTTAATCGAGACGGGCGCATATagaaCCTAGGTGGCGAAGAGCCTGCAggt…			used to make [4072]
4069		plasmid	DR274 NT FLP sl2 mNG	FLP D5 and mNG in a GG SapI GGT ACG assembly vector	this study	4425	TGGGCCTTTCTTCGGTAGAAAATCAAAGGATCTTCttgagatcctttttttctgcgcgtaatctgctgcttgcaaacaaaaaaaccaccgctaccagcggtggtttgtttgccggatcaagagctaccaactctttttccgaggtaactggcttcagcagagcgcagataccaaatactgttcttctagtgtagccgtagttaggccaccacttcaagaactctgtagcaccgcctacatacctcgctctgctaatcctgttaccagtggctgctgccagtggcgataagtcgtgtcttaccgggttggactcaagacgatagttaccggataaggcgcagcggtcgggctgaacggggggttcgtgcacacagcccagcttggagcgaacgacctaca…			used to make [4081]
4071		plasmid	pRMHEmB	RMCE vector for creating RMHE compatible insertions with 3' attB site	this study	8234	atgagcacttttaaagttctgctatgtggcgcggtattatcccgtattgacgccgggcaagagcaactcggtcgccgcatacactattctcagaatgacttggttgagtactcaccagtcacagaaaagcatcttacggatggcatgacagtaagagaattatgcagtgctgccataaccatgagtgataacactgcggccaacttacttctgacaacgatcggaggaccgaaggagctaaccgcttttttgcacaacatgggggatcatgtaactcgccttgatcgttgggaaccggagctgaatgaagccataccaaacgacgagcgtgacaccacgatgcctgtagcaatggcaacaacgttgcgcaaactattaactggcgaactacttactcta…			used to make [4075] & [4082]
4072		plasmid	pRMHEmP	RMCE vector for creating RMHE compatible insertions with 5'' attP site	this study	8257	atgagcacttttaaagttctgctatgtggcgcggtattatcccgtattgacgccgggcaagagcaactcggtcgccgcatacactattctcagaatgacttggttgagtactcaccagtcacagaaaagcatcttacggatggcatgacagtaagagaattatgcagtgctgccataaccatgagtgataacactgcggccaacttacttctgacaacgatcggaggaccgaaggagctaaccgcttttttgcacaacatgggggatcatgtaactcgccttgatcgttgggaaccggagctgaatgaagccataccaaacgacgagcgtgacaccacgatgcctgtagcaatggcaacaacgttgcgcaaactattaactggcgaactacttactcta…			used to make [4085] & [4355]
4073		plasmid	pLF3FShC2 tetO 21X GFP-C1	tetO 21X promoter driving GFP-C1 in an RMCE integration vector	this study	10027	GAAGTTCCTATTCtctagaaaGTATAGGAACTTCATGAAAAAGCCTGAACTCACCGCGACGTCTGTCGAGAAGTTTCTGATCGAAAAGTTCGACAGCGTCTCCGACCTGATGCAGCTCTCGGAGGGCGAAGAATCTCGTGCTTTCAGCTTCGATGTAGGAGGGCGTGGATATGTCCTGCGGGTAAATAGCTGCGCCGATGGTTTCTACAAAGATCGTTATGTTTATCGGCACTTTGCATCGGCCGCGCTCCCGATTCCGGAAGTGCTTGACATTGGGGAATTCAGCGAGAGCCTGACCTATTGCATCTCCCGCCGTGCACAGGGTGTCACGTTGCAAGACCTGCCTGAAACCGAACTGCCCGCTGTTCTGCAGCCGGTCGCGGAGGCCATGGATGCGAT…			Fig. 1, 2, 4, S1, S2, S4
4075		plasmid	pRMHEmB mec-4sp tetR-L-QF	mec-4 synthetic promoter driving tetR-L-QF in an RMHE attB vector	this study	10659	atgagcacttttaaagttctgctatgtggcgcggtattatcccgtattgacgccgggcaagagcaactcggtcgccgcatacactattctcagaatgacttggttgagtactcaccagtcacagaaaagcatcttacggatggcatgacagtaagagaattatgcagtgctgccataaccatgagtgataacactgcggccaacttacttctgacaacgatcggaggaccgaaggagctaaccgcttttttgcacaacatgggggatcatgtaactcgccttgatcgttgggaaccggagctgaatgaagccataccaaacgacgagcgtgacaccacgatgcctgtagcaatggcaacaacgttgcgcaaactattaactggcgaactacttactcta…			Fig. 1, 2, 4, S1, S2, S4
4077		plasmid	DR274 5' arm-CT tetO 1X ∆mec-7	tetO 1X mec-7 basal promoter in a GG SapI TGG ATG assembly vector	this study	2112	gttggaacctcttacgtgccGATCAAGTCAAAAGCCTCCGGTCGGAGGCTTTTGACTTTCTGCTATGGAGGTCAGGTATGATTTttGAATTCGCTCTTCGTGGcttgcatgcccgtcttcactcgcagtttactccctatcagtgatagagaacgtatgtcgaggtaggcgtGCGagatgtgactcctcccattattcgtcttgagtcgcatcttttgtcttggtccgttgtcagtcgagcctcaaggcagccgttccgccagtgatcgcctgctaagaagttgtaggtgtagaggaagaaacgtcgggtccaaatttcaagcaacATGaGAAGAGCAAGCTTGGATCGACGAGAGCAGCGCGACTGGATCTGTCGCCCGTCTCAAACGCAACCCTCCG…			used to make [4080]
4079		plasmid	DR274 5' arm-CT tetO 4X ∆mec-7	tetO 4X mec-7 basal promoter in a GG SapI TGG ATG assembly vector	this study	2220	gttggaacctcttacgtgccGATCAAGTCAAAAGCCTCCGGTCGGAGGCTTTTGACTTTCTGCTATGGAGGTCAGGTATGATTTttGAATTCGCTCTTCGTGGcttgcatgcccgtcttcactcggagtttactccctatcagtgatagagaacgtatgaccagtttactccctatcagtgatagagaacgtatctacagtttactccctatcagtgatagagaacgtatatccagtttactccctatcagtgatagagaacgtatgtcgaggtaggcgtGCGagatgtgactcctcccattattcgtcttgagtcgcatcttttgtcttggtccgttgtcagtcgagcctcaaggcagccgttccgccagtgatcgcctgctaagaagttgtaggtgt…			used to make [4143] & [4251]
4080		plasmid	pLF3FShC tetO 1X ∆mec-7 GFP-C1	tetO 1X mec-7 basal promoter driving GFP-C1 in an RMCE integration vector	this study	9236	GAAGTTCCTATTCtctagaaaGTATAGGAACTTCATGAAAAAGCCTGAACTCACCGCGACGTCTGTCGAGAAGTTTCTGATCGAAAAGTTCGACAGCGTCTCCGACCTGATGCAGCTCTCGGAGGGCGAAGAATCTCGTGCTTTCAGCTTCGATGTAGGAGGGCGTGGATATGTCCTGCGGGTAAATAGCTGCGCCGATGGTTTCTACAAAGATCGTTATGTTTATCGGCACTTTGCATCGGCCGCGCTCCCGATTCCGGAAGTGCTTGACATTGGGGAATTCAGCGAGAGCCTGACCTATTGCATCTCCCGCCGTGCACAGGGTGTCACGTTGCAAGACCTGCCTGAAACCGAACTGCCCGCTGTTCTGCAGCCGGTCGCGGAGGCCATGGATGCGAT…			Fig. 1, 2, S1, S2
4081		plasmid	pLF3FShC mex-5p phiC31 sl2 FLP D5 sl2 mNG	mex-5 promoter driving expression of an operon of phiC31, FLP D5, and mNG in an RMCE integration vector	this study	13549	GAAGTTCCTATTCtctagaaaGTATAGGAACTTCATGAAAAAGCCTGAACTCACCGCGACGTCTGTCGAGAAGTTTCTGATCGAAAAGTTCGACAGCGTCTCCGACCTGATGCAGCTCTCGGAGGGCGAAGAATCTCGTGCTTTCAGCTTCGATGTAGGAGGGCGTGGATATGTCCTGCGGGTAAATAGCTGCGCCGATGGTTTCTACAAAGATCGTTATGTTTATCGGCACTTTGCATCGGCCGCGCTCCCGATTCCGGAAGTGCTTGACATTGGGGAATTCAGCGAGAGCCTGACCTATTGCATCTCCCGCCGTGCACAGGGTGTCACGTTGCAAGACCTGCCTGAAACCGAACTGCCCGCTGTTCTGCAGCCGGTCGCGGAGGCCATGGATGCGAT…			used to make [4837]
4082		plasmid	pRMHEB	derivative of pRMHEmB with full sized attB instead of minimal attB site	this study	8471	atgagcacttttaaagttctgctatgtggcgcggtattatcccgtattgacgccgggcaagagcaactcggtcgccgcatacactattctcagaatgacttggttgagtactcaccagtcacagaaaagcatcttacggatggcatgacagtaagagaattatgcagtgctgccataaccatgagtgataacactgcggccaacttacttctgacaacgatcggaggaccgaaggagctaaccgcttttttgcacaacatgggggatcatgtaactcgccttgatcgttgggaaccggagctgaatgaagccataccaaacgacgagcgtgacaccacgatgcctgtagcaatggcaacaacgttgcgcaaactattaactggcgaactacttactcta…			used to make [4086], [4090], [4091], [4092], [4093], [4094], & [4161]
4085		plasmid	pRMHEP	derivative of pRMHEmP with full sized attP instead of minimal attP site	this study	8436	atgagcacttttaaagttctgctatgtggcgcggtattatcccgtattgacgccgggcaagagcaactcggtcgccgcatacactattctcagaatgacttggttgagtactcaccagtcacagaaaagcatcttacggatggcatgacagtaagagaattatgcagtgctgccataaccatgagtgataacactgcggccaacttacttctgacaacgatcggaggaccgaaggagctaaccgcttttttgcacaacatgggggatcatgtaactcgccttgatcgttgggaaccggagctgaatgaagccataccaaacgacgagcgtgacaccacgatgcctgtagcaatggcaacaacgttgcgcaaactattaactggcgaactacttactcta…			used to make [4143], [4251], [4481], [4483], & [4484]
4086		plasmid	pRMHEB mec-4Sp tetR-L-QF	mec-4 synthetic promoter driving tetR-L-QF in an RMHE attB vector	this study	10896	atgagcacttttaaagttctgctatgtggcgcggtattatcccgtattgacgccgggcaagagcaactcggtcgccgcatacactattctcagaatgacttggttgagtactcaccagtcacagaaaagcatcttacggatggcatgacagtaagagaattatgcagtgctgccataaccatgagtgataacactgcggccaacttacttctgacaacgatcggaggaccgaaggagctaaccgcttttttgcacaacatgggggatcatgtaactcgccttgatcgttgggaaccggagctgaatgaagccataccaaacgacgagcgtgacaccacgatgcctgtagcaatggcaacaacgttgcgcaaactattaactggcgaactacttactcta…			Fig. 3, 4, 5, 6, S3, S4, S5, S6
4090		plasmid	pRMHEB ehs-1p tetR-LL-QF act-4 3'	ehs-1 promoter driving tetR-LL-QF in an RMHE attB vector	this study	10629	atgagcacttttaaagttctgctatgtggcgcggtattatcccgtattgacgccgggcaagagcaactcggtcgccgcatacactattctcagaatgacttggttgagtactcaccagtcacagaaaagcatcttacggatggcatgacagtaagagaattatgcagtgctgccataaccatgagtgataacactgcggccaacttacttctgacaacgatcggaggaccgaaggagctaaccgcttttttgcacaacatgggggatcatgtaactcgccttgatcgttgggaaccggagctgaatgaagccataccaaacgacgagcgtgacaccacgatgcctgtagcaatggcaacaacgttgcgcaaactattaactggcgaactacttactcta…			Fig. 4, S4
4091		plasmid	pRMHEB nhx-2p tetR-LL-QF act-4 3'	nhx-2 promoter driving tetR-LL-QF in an RMHE attB vector	this study	11860	atgagcacttttaaagttctgctatgtggcgcggtattatcccgtattgacgccgggcaagagcaactcggtcgccgcatacactattctcagaatgacttggttgagtactcaccagtcacagaaaagcatcttacggatggcatgacagtaagagaattatgcagtgctgccataaccatgagtgataacactgcggccaacttacttctgacaacgatcggaggaccgaaggagctaaccgcttttttgcacaacatgggggatcatgtaactcgccttgatcgttgggaaccggagctgaatgaagccataccaaacgacgagcgtgacaccacgatgcctgtagcaatggcaacaacgttgcgcaaactattaactggcgaactacttactcta…			Fig. 3, 5, S4, 6
4092		plasmid	pRMHEB cup-4p tetR-LL-QF act-4 3'	cup-4 promoter driving tetR-LL-QF in an RMHE attB vector	this study	12597	GAAGTTCCTATTCtctagaaaGTATAGGAACTTCATGAAAAAGCCTGAACTCACCGCGACGTCTGTCGAGAAGTTTCTGATCGAAAAGTTCGACAGCGTCTCCGACCTGATGCAGCTCTCGGAGGGCGAAGAATCTCGTGCTTTCAGCTTCGATGTAGGAGGGCGTGGATATGTCCTGCGGGTAAATAGCTGCGCCGATGGTTTCTACAAAGATCGTTATGTTTATCGGCACTTTGCATCGGCCGCGCTCCCGATTCCGGAAGTGCTTGACATTGGGGAATTCAGCGAGAGCCTGACCTATTGCATCTCCCGCCGTGCACAGGGTGTCACGTTGCAAGACCTGCCTGAAACCGAACTGCCCGCTGTTCTGCAGCCGGTCGCGGAGGCCATGGATGCGAT…			Fig. 4, S4
4093		plasmid	pRMHEB myo-2p tetR-LL-QF act-4 3'	myo-2 promoter driving tetR-LL-QF in an RMHE attB vector	this study	11255	atgagcacttttaaagttctgctatgtggcgcggtattatcccgtattgacgccgggcaagagcaactcggtcgccgcatacactattctcagaatgacttggttgagtactcaccagtcacagaaaagcatcttacggatggcatgacagtaagagaattatgcagtgctgccataaccatgagtgataacactgcggccaacttacttctgacaacgatcggaggaccgaaggagctaaccgcttttttgcacaacatgggggatcatgtaactcgccttgatcgttgggaaccggagctgaatgaagccataccaaacgacgagcgtgacaccacgatgcctgtagcaatggcaacaacgttgcgcaaactattaactggcgaactacttactcta…			Fig. 4, S4
4094		plasmid	pRMHEB dpy-7p tetR-LL-QF act-4 3'	dpy-7 promoter driving tetR-LL-QF in an RMHE attB vector	this study	10625	TGGATCTCATTCCACGATTTCTCGCAACACATCCCTTATATTCTACATTCCTTTTTCGCATGTACTCATCTCTTCTCGTTTGGAATCTTTTCTTATCTCCGATAATTGGGTTATTGTGTCGATAAAGACTGACCTATTTAACAGATACACTCCACCTTCATCCACCTTTCCGTTTTCTACAATCCATGTTCTTTTCAATTCAATTCATTTATCACACCCTGTTCTTTTTTTTAATTTATATTTTTTGTCAAAACTCGAAATATTTTTTCTACCGCTCTGTGAAAACAAAACAAGATTCATTCTGAATGAAACAATTTTTAAGAATATTCTTACATTTTGTTCCAGATAAATGTCACGTCTAGATAAATCCAAGGTCATCAACTCCGCCCTCGAGCTCCT…			Fig. 4, S4
4096		plasmid	DR274 CT lexO 3X ∆pes-10	lexO 3X pes-10 basal promoter in a GG SapI TGG ATG assembly vector	Knoebel, Dour, & Nonet, 2023	2168	TGGGCCTTTCTTCGGTAGAAAATCAAAGGATCTTCttgagatcctttttttctgcgcgtaatctgctgcttgcaaacaaaaaaaccaccgctaccagcggtggtttgtttgccggatcaagagctaccaactctttttccgaggtaactggcttcagcagagcgcagataccaaatactgttcttctagtgtagccgtagttaggccaccacttcaagaactctgtagcaccgcctacatacctcgctctgctaatcctgttaccagtggctgctgccagtggcgataagtcgtgtcttaccgggttggactcaagacgatagttaccggataaggcgcagcggtcgggctgaacggggggttcgtgcacacagcccagcttggagcgaacgacctaca…			used to make [4101]
4099		plasmid	DR274 AAC TGG lexO 5X	lexO 5X operator in a GG SapI ACC TGG assembly vector	Knoebel, Dour, & Nonet, 2023	1999	TGGGCCTTTCTTCGGTAGAAAATCAAAGGATCTTCttgagatcctttttttctgcgcgtaatctgctgcttgcaaacaaaaaaaccaccgctaccagcggtggtttgtttgccggatcaagagctaccaactctttttccgaggtaactggcttcagcagagcgcagataccaaatactgttcttctagtgtagccgtagttaggccaccacttcaagaactctgtagcaccgcctacatacctcgctctgctaatcctgttaccagtggctgctgccagtggcgataagtcgtgtcttaccgggttggactcaagacgatagttaccggataaggcgcagcggtcgggctgaacggggggttcgtgcacacagcccagcttggagcgaacgacctaca…			used to make [4101] & [4364]
4100		plasmid	pLF3FShC lexO 8X GFP-C1	lexO 8X with pes-10 basal promoter driving GFP-C1 in an RMCE integration vector	Knoebel, Dour, & Nonet, 2023	9405	GAAGTTCCTATTCtctagaaaGTATAGGAACTTCATGAAAAAGCCTGAACTCACCGCGACGTCTGTCGAGAAGTTTCTGATCGAAAAGTTCGACAGCGTCTCCGACCTGATGCAGCTCTCGGAGGGCGAAGAATCTCGTGCTTTCAGCTTCGATGTAGGAGGGCGTGGATATGTCCTGCGGGTAAATAGCTGCGCCGATGGTTTCTACAAAGATCGTTATGTTTATCGGCACTTTGCATCGGCCGCGCTCCCGATTCCGGAAGTGCTTGACATTGGGGAATTCAGCGAGAGCCTGACCTATTGCATCTCCCGCCGTGCACAGGGTGTCACGTTGCAAGACCTGCCTGAAACCGAACTGCCCGCTGTTCTGCAGCCGGTCGCGGAGGCCATGGATGCGAT…			Fig. 2, S2 & used to make [4337]
4101		plasmid	pLF3FShC2 lexO 13X GFP-C1	lexO 13X with pes-10 basal promoter driving GFP-C1 in an RMCE integration vector	this study	9577	GAAGTTCCTATTCtctagaaaGTATAGGAACTTCATGAAAAAGCCTGAACTCACCGCGACGTCTGTCGAGAAGTTTCTGATCGAAAAGTTCGACAGCGTCTCCGACCTGATGCAGCTCTCGGAGGGCGAAGAATCTCGTGCTTTCAGCTTCGATGTAGGAGGGCGTGGATATGTCCTGCGGGTAAATAGCTGCGCCGATGGTTTCTACAAAGATCGTTATGTTTATCGGCACTTTGCATCGGCCGCGCTCCCGATTCCGGAAGTGCTTGACATTGGGGAATTCAGCGAGAGCCTGACCTATTGCATCTCCCGCCGTGCACAGGGTGTCACGTTGCAAGACCTGCCTGAAACCGAACTGCCCGCTGTTCTGCAGCCGGTCGCGGAGGCCATGGATGCGAT…			Fig. 2, S2
4114		plasmid	DR274 SEC V2A	V2A in a GG SapI AAG GGT assembly vector	Nonet, 2023	1958	TGGGCCTTTCTTCGGTAGAAAATCAAAGGATCTTCttgagatcctttttttctgcgcgtaatctgctgcttgcaaacaaaaaaaccaccgctaccagcggtggtttgtttgccggatcaagagctaccaactctttttccgaggtaactggcttcagcagagcgcagataccaaatactgttcttctagtgtagccgtagttaggccaccacttcaagaactctgtagcaccgcctacatacctcgctctgctaatcctgttaccagtggctgctgccagtggcgataagtcgtgtcttaccgggttggactcaagacgatagttaccggataaggcgcagcggtcgggctgaacggggggttcgtgcacacagcccagcttggagcgaacgacctaca…			used to make [4143]
4134		plasmid	DR274 NT nls-BsaI-nls	DR274 NT entry vector for turning an FP clone into an N- and C terminal NLS tagged clone	Nonet, 2023	2014	TGGGCCTTTCTTCGGTAGAAAATCAAAGGATCTTCttgagatcctttttttctgcgcgtaatctgctgcttgcaaacaaaaaaaccaccgctaccagcggtggtttgtttgccggatcaagagctaccaactctttttccgaggtaactggcttcagcagagcgcagataccaaatactgttcttctagtgtagccgtagttaggccaccacttcaagaactctgtagcaccgcctacatacctcgctctgctaatcctgttaccagtggctgctgccagtggcgataagtcgtgtcttaccgggttggactcaagacgatagttaccggataaggcgcagcggtcgggctgaacggggggttcgtgcacacagcccagcttggagcgaacgacctaca…			used to make [4140]
4137		plasmid	DR274 FP mScarlet-C1	mScarlet-C1 in a GG SapI ATG AAG assembly vector	Nonet, 2023	2732	TGGGCCTTTCTTCGGTAGAAAATCAAAGGATCTTCttgagatcctttttttctgcgcgtaatctgctgcttgcaaacaaaaaaaccaccgctaccagcggtggtttgtttgccggatcaagagctaccaactctttttccgaggtaactggcttcagcagagcgcagataccaaatactgttcttctagtgtagccgtagttaggccaccacttcaagaactctgtagcaccgcctacatacctcgctctgctaatcctgttaccagtggctgctgccagtggcgataagtcgtgtcttaccgggttggactcaagacgatagttaccggataaggcgcagcggtcgggctgaacggggggttcgtgcacacagcccagcttggagcgaacgacctaca…			used to make [4839], [4840], [4842], [4843], [4938], [4939], [4952], [4953], [4954], [4955], & [4956]
4140		plasmid	DR274 NT nls-scarlet-nls	mScarlet-I-C1 with N- and C-terminal nls in a GG SapI GGT ACG assembly vector	this study	2834	TGGGCCTTTCTTCGGTAGAAAATCAAAGGATCTTCttgagatcctttttttctgcgcgtaatctgctgcttgcaaacaaaaaaaccaccgctaccagcggtggtttgtttgccggatcaagagctaccaactctttttccgaggtaactggcttcagcagagcgcagataccaaatactgttcttctagtgtagccgtagttaggccaccacttcaagaactctgtagcaccgcctacatacctcgctctgctaatcctgttaccagtggctgctgccagtggcgataagtcgtgtcttaccgggttggactcaagacgatagttaccggataaggcgcagcggtcgggctgaacggggggttcgtgcacacagcccagcttggagcgaacgacctaca…			used to make [4143]
4143		plasmid	pRMHEP tetO 4X TIR1 V2A nls-scarlet	tetO 4X driving TIR1 and nls-scarlet-C1 in an RMCE integration vector	this study	11965	atgagcacttttaaagttctgctatgtggcgcggtattatcccgtattgacgccgggcaagagcaactcggtcgccgcatacactattctcagaatgacttggttgagtactcaccagtcacagaaaagcatcttacggatggcatgacagtaagagaattatgcagtgctgccataaccatgagtgataacactgcggccaacttacttctgacaacgatcggaggaccgaaggagctaaccgcttttttgcacaacatgggggatcatgtaactcgccttgatcgttgggaaccggagctgaatgaagccataccaaacgacgagcgtgacaccacgatgcctgtagcaatggcaacaacgttgcgcaaactattaactggcgaactacttactcta…			used to make [4766]
4145		plasmid	DR274 5' arm tetO 7X ∆pes-10	tetO 7X ∆pes-10 promoter in a GG SapI TGG GCG assembly vector	Knoebel, Dour, & Nonet, 2023	2364	TGGGCCTTTCTTCGGTAGAAAATCAAAGGATCTTCttgagatcctttttttctgcgcgtaatctgctgcttgcaaacaaaaaaaccaccgctaccagcggtggtttgtttgccggatcaagagctaccaactctttttccgaggtaactggcttcagcagagcgcagataccaaatactgttcttctagtgtagccgtagttaggccaccacttcaagaactctgtagcaccgcctacatacctcgctctgctaatcctgttaccagtggctgctgccagtggcgataagtcgtgtcttaccgggttggactcaagacgatagttaccggataaggcgcagcggtcgggctgaacggggggttcgtgcacacagcccagcttggagcgaacgacctaca…			Fig. 5 & used to make [4173]
4146		plasmid	DR274 CT ∆mec-7 noATG	mec-7 basal promoter with distal ATG lesioned	this study	2040	gttggaacctcttacgtgccGATCAAGTCAAAAGCCTCCGGTCGGAGGCTTTTGACTTTCTGCTATGGAGGTCAGGTATGATTTttGAATTCGCTCTTCgGCGagttgtgactcctcccattattcgtcttgagtcgcatcttttgtcttggtccgttgtcagtcgagcctcaaggcagccgttccgccagtgatcgcctgctaagaagttgtaggtgtagaggaagaaacgtcgggtccaaatttcaagcaacATGaGAAGAGCAAGCTTGGATCGACGAGAGCAGCGCGACTGGATCTGTCGCCCGTCTCAAACGCAACCCTCCGGCGGTCGCATATCATTCAGGACGAGCCTCAGACTCCAGCGTAACTGGACTGCAATCAACTCACTGGCTCACC…			used to make [4173]
4161		plasmid	pRMHEB vha-6p tetR-LL-QF	vha-6 promoter driving tetR-LL-QF in an RMHE compatible RMCE vector	this study	11274	atgagcacttttaaagttctgctatgtggcgcggtattatcccgtattgacgccgggcaagagcaactcggtcgccgcatacactattctcagaatgacttggttgagtactcaccagtcacagaaaagcatcttacggatggcatgacagtaagagaattatgcagtgctgccataaccatgagtgataacactgcggccaacttacttctgacaacgatcggaggaccgaaggagctaaccgcttttttgcacaacatgggggatcatgtaactcgccttgatcgttgggaaccggagctgaatgaagccataccaaacgacgagcgtgacaccacgatgcctgtagcaatggcaacaacgttgcgcaaactattaactggcgaactacttactcta…			Fig. 4, S4
4173		plasmid	pLF3FShC tetO 7X ∆pes-10 ∆mec-7 GFP-C1	dual mec-7 basal promoter and pes-10 basal promoter under control of tetO 7X in an RMCE integration vector	this study	9642	GAAGTTCCTATTCtctagaaaGTATAGGAACTTCATGAAAAAGCCTGAACTCACCGCGACGTCTGTCGAGAAGTTTCTGATCGAAAAGTTCGACAGCGTCTCCGACCTGATGCAGCTCTCGGAGGGCGAAGAATCTCGTGCTTTCAGCTTCGATGTAGGAGGGCGTGGATATGTCCTGCGGGTAAATAGCTGCGCCGATGGTTTCTACAAAGATCGTTATGTTTATCGGCACTTTGCATCGGCCGCGCTCCCGATTCCGGAAGTGCTTGACATTGGGGAATTCAGCGAGAGCCTGACCTATTGCATCTCCCGCCGTGCACAGGGTGTCACGTTGCAAGACCTGCCTGAAACCGAACTGCCCGCTGTTCTGCAGCCGGTCGCGGAGGCCATGGATGCGAT…			Fig. 5, S5
4191		plasmid	DR274 5' arm tetO 6XT	tetO 6X sequences in a GG SapI TGG GCG assembly vector	this study	2051	TGGGCCTTTCTTCGGTAGAAAATCAAAGGATCTTCttgagatcctttttttctgcgcgtaatctgctgcttgcaaacaaaaaaaccaccgctaccagcggtggtttgtttgccggatcaagagctaccaactctttttccgaggtaactggcttcagcagagcgcagataccaaatactgttcttctagtgtagccgtagttaggccaccacttcaagaactctgtagcaccgcctacatacctcgctctgctaatcctgttaccagtggctgctgccagtggcgataagtcgtgtcttaccgggttggactcaagacgatagttaccggataaggcgcagcggtcgggctgaacggggggttcgtgcacacagcccagcttggagcgaacgacctaca…			used to make [4276] & [4277]
4201		plasmid	pLF3FShC tetO 6X GFP-C1	tetO 6X mec-7 basal promoter driving GFP-C1 in an RMCE integration vector	this study	9329	GAAGTTCCTATTCtctagaaaGTATAGGAACTTCATGAAAAAGCCTGAACTCACCGCGACGTCTGTCGAGAAGTTTCTGATCGAAAAGTTCGACAGCGTCTCCGACCTGATGCAGCTCTCGGAGGGCGAAGAATCTCGTGCTTTCAGCTTCGATGTAGGAGGGCGTGGATATGTCCTGCGGGTAAATAGCTGCGCCGATGGTTTCTACAAAGATCGTTATGTTTATCGGCACTTTGCATCGGCCGCGCTCCCGATTCCGGAAGTGCTTGACATTGGGGAATTCAGCGAGAGCCTGACCTATTGCATCTCCCGCCGTGCACAGGGTGTCACGTTGCAAGACCTGCCTGAAACCGAACTGCCCGCTGTTCTGCAGCCGGTCGCGGAGGCCATGGATGCGAT…			Fig. 2, S2
4215		plasmid	DR274 SEC-3' arm glh-2 3'	glh-2 3' UTR in a GG SapI AAG GTA assembly vector	Nonet, 2023	2336	TGGGCCTTTCTTCGGTAGAAAATCAAAGGATCTTCttgagatcctttttttctgcgcgtaatctgctgcttgcaaacaaaaaaaccaccgctaccagcggtggtttgtttgccggatcaagagctaccaactctttttccgaggtaactggcttcagcagagcgcagataccaaatactgttcttctagtgtagccgtagttaggccaccacttcaagaactctgtagcaccgcctacatacctcgctctgctaatcctgttaccagtggctgctgccagtggcgataagtcgtgtcttaccgggttggactcaagacgatagttaccggataaggcgcagcggtcgggctgaacggggggttcgtgcacacagcccagcttggagcgaacgacctaca…			used to make [4894], [4935], & [4939]
4225		plasmid	DR274 5' arm UAS 3X	UAS 3X in a GG SapI TGG GCG SapI assembly vector	this study	1967	TGGGCCTTTCTTCGGTAGAAAATCAAAGGATCTTCttgagatcctttttttctgcgcgtaatctgctgcttgcaaacaaaaaaaccaccgctaccagcggtggtttgtttgccggatcaagagctaccaactctttttccgaggtaactggcttcagcagagcgcagataccaaatactgttcttctagtgtagccgtagttaggccaccacttcaagaactctgtagcaccgcctacatacctcgctctgctaatcctgttaccagtggctgctgccagtggcgataagtcgtgtcttaccgggttggactcaagacgatagttaccggataaggcgcagcggtcgggctgaacggggggttcgtgcacacagcccagcttggagcgaacgacctaca…			used to make [4237], [4238], & [4356]
4232		plasmid	DR274 CT UAS 11X ∆pes-10	UAS 11X pes-10 basal promoter in a GG SapI GCG ATG assembly vector	Knoebel, Dour, & Nonet, 2023	2408	TGGGCCTTTCTTCGGTAGAAAATCAAAGGATCTTCttgagatcctttttttctgcgcgtaatctgctgcttgcaaacaaaaaaaccaccgctaccagcggtggtttgtttgccggatcaagagctaccaactctttttccgaggtaactggcttcagcagagcgcagataccaaatactgttcttctagtgtagccgtagttaggccaccacttcaagaactctgtagcaccgcctacatacctcgctctgctaatcctgttaccagtggctgctgccagtggcgataagtcgtgtcttaccgggttggactcaagacgatagttaccggataaggcgcagcggtcgggctgaacggggggttcgtgcacacagcccagcttggagcgaacgacctaca…			used to make [4236] & [4238]
4233		plasmid	DR274 FP GFP1-10-C1	Synthetic GFP1-10 in a DR274 SapI ATG AAG SapI entry vector	Knoebel, Dour, & Nonet, 2023	2627	TGGGCCTTTCTTCGGTAGAAAATCAAAGGATCTTCttgagatcctttttttctgcgcgtaatctgctgcttgcaaacaaaaaaaccaccgctaccagcggtggtttgtttgccggatcaagagctaccaactctttttccgaggtaactggcttcagcagagcgcagataccaaatactgttcttctagtgtagccgtagttaggccaccacttcaagaactctgtagcaccgcctacatacctcgctctgctaatcctgttaccagtggctgctgccagtggcgataagtcgtgtcttaccgggttggactcaagacgatagttaccggataaggcgcagcggtcgggctgaacggggggttcgtgcacacagcccagcttggagcgaacgacctaca…			used to make [4251]
4236		plasmid	pLF3FShC UAS 22X ∆pes-10 GFP-C1	UAS 22X pes-10 basal promoter driving GFP-C1 in an RMCE integration vector	this study	9856	GAAGTTCCTATTCtctagaaaGTATAGGAACTTCATGAAAAAGCCTGAACTCACCGCGACGTCTGTCGAGAAGTTTCTGATCGAAAAGTTCGACAGCGTCTCCGACCTGATGCAGCTCTCGGAGGGCGAAGAATCTCGTGCTTTCAGCTTCGATGTAGGAGGGCGTGGATATGTCCTGCGGGTAAATAGCTGCGCCGATGGTTTCTACAAAGATCGTTATGTTTATCGGCACTTTGCATCGGCCGCGCTCCCGATTCCGGAAGTGCTTGACATTGGGGAATTCAGCGAGAGCCTGACCTATTGCATCTCCCGCCGTGCACAGGGTGTCACGTTGCAAGACCTGCCTGAAACCGAACTGCCCGCTGTTCTGCAGCCGGTCGCGGAGGCCATGGATGCGAT…			Fig. 2, S2
4237		plasmid	pLF3FShC UAS 3X ∆pes-10 GFP-C1	UAS 5X pes-10 basal promoter driving GFP-C1 in an RMCE integration vector	this study	9288	GAAGTTCCTATTCtctagaaaGTATAGGAACTTCATGAAAAAGCCTGAACTCACCGCGACGTCTGTCGAGAAGTTTCTGATCGAAAAGTTCGACAGCGTCTCCGACCTGATGCAGCTCTCGGAGGGCGAAGAATCTCGTGCTTTCAGCTTCGATGTAGGAGGGCGTGGATATGTCCTGCGGGTAAATAGCTGCGCCGATGGTTTCTACAAAGATCGTTATGTTTATCGGCACTTTGCATCGGCCGCGCTCCCGATTCCGGAAGTGCTTGACATTGGGGAATTCAGCGAGAGCCTGACCTATTGCATCTCCCGCCGTGCACAGGGTGTCACGTTGCAAGACCTGCCTGAAACCGAACTGCCCGCTGTTCTGCAGCCGGTCGCGGAGGCCATGGATGCGAT…			Fig. 2, S2, & used to make [4345]
4238		plasmid	pLF3FShC UAS 14X ∆pes-10 GFP-C1	UAS 14X pes-10 basal promoter driving GFP-C1 in an RMCE integration vector	this study	9613	GAAGTTCCTATTCtctagaaaGTATAGGAACTTCATGAAAAAGCCTGAACTCACCGCGACGTCTGTCGAGAAGTTTCTGATCGAAAAGTTCGACAGCGTCTCCGACCTGATGCAGCTCTCGGAGGGCGAAGAATCTCGTGCTTTCAGCTTCGATGTAGGAGGGCGTGGATATGTCCTGCGGGTAAATAGCTGCGCCGATGGTTTCTACAAAGATCGTTATGTTTATCGGCACTTTGCATCGGCCGCGCTCCCGATTCCGGAAGTGCTTGACATTGGGGAATTCAGCGAGAGCCTGACCTATTGCATCTCCCGCCGTGCACAGGGTGTCACGTTGCAAGACCTGCCTGAAACCGAACTGCCCGCTGTTCTGCAGCCGGTCGCGGAGGCCATGGATGCGAT…			Fig. 2, S2
4251		plasmid	pRMHEP tetO 4X GFP1-10 sl2 scarlet-I-C1	RMHE compatible RMCE integration clone to express GFP1-10 and scarlet under the control of a tetO 4X promoter	this study	10908	atgagcacttttaaagttctgctatgtggcgcggtattatcccgtattgacgccgggcaagagcaactcggtcgccgcatacactattctcagaatgacttggttgagtactcaccagtcacagaaaagcatcttacggatggcatgacagtaagagaattatgcagtgctgccataaccatgagtgataacactgcggccaacttacttctgacaacgatcggaggaccgaaggagctaaccgcttttttgcacaacatgggggatcatgtaactcgccttgatcgttgggaaccggagctgaatgaagccataccaaacgacgagcgtgacaccacgatgcctgtagcaatggcaacaacgttgcgcaaactattaactggcgaactacttactcta…			used to make [4838]
4271		plasmid	DR274 AAC TGG tetO 6X	tetO 6X in a GG SapI AAC TGG assembly vector	this study	2051	TGGGCCTTTCTTCGGTAGAAAATCAAAGGATCTTCttgagatcctttttttctgcgcgtaatctgctgcttgcaaacaaaaaaaccaccgctaccagcggtggtttgtttgccggatcaagagctaccaactctttttccgaggtaactggcttcagcagagcgcagataccaaatactgttcttctagtgtagccgtagttaggccaccacttcaagaactctgtagcaccgcctacatacctcgctctgctaatcctgttaccagtggctgctgccagtggcgataagtcgtgtcttaccgggttggactcaagacgatagttaccggataaggcgcagcggtcgggctgaacggggggttcgtgcacacagcccagcttggagcgaacgacctaca…			used to make [4276]
4273		plasmid	DR274 CAA TGG tetO 6X	tetO 6X in a GG SapI CAA TGG assembly vector	this study	2051	TGGGCCTTTCTTCGGTAGAAAATCAAAGGATCTTCttgagatcctttttttctgcgcgtaatctgctgcttgcaaacaaaaaaaccaccgctaccagcggtggtttgtttgccggatcaagagctaccaactctttttccgaggtaactggcttcagcagagcgcagataccaaatactgttcttctagtgtagccgtagttaggccaccacttcaagaactctgtagcaccgcctacatacctcgctctgctaatcctgttaccagtggctgctgccagtggcgataagtcgtgtcttaccgggttggactcaagacgatagttaccggataaggcgcagcggtcgggctgaacggggggttcgtgcacacagcccagcttggagcgaacgacctaca…			used to make [4277]
4275		plasmid	DR274 AAC CAA tetO 6X	tetO 6X in a GG SapI AAC CAA assembly vector	this study	2051	TGGGCCTTTCTTCGGTAGAAAATCAAAGGATCTTCttgagatcctttttttctgcgcgtaatctgctgcttgcaaacaaaaaaaccaccgctaccagcggtggtttgtttgccggatcaagagctaccaactctttttccgaggtaactggcttcagcagagcgcagataccaaatactgttcttctagtgtagccgtagttaggccaccacttcaagaactctgtagcaccgcctacatacctcgctctgctaatcctgttaccagtggctgctgccagtggcgataagtcgtgtcttaccgggttggactcaagacgatagttaccggataaggcgcagcggtcgggctgaacggggggttcgtgcacacagcccagcttggagcgaacgacctaca…			used to make [4277]
4276		plasmid	pLF3FShC2 tetO 12X GFP-C1	tetO 12X and mec-7 basal promoter driving GFP-C1 in an RMCE integration vector	this study	9497	GAAGTTCCTATTCtctagaaaGTATAGGAACTTCATGAAAAAGCCTGAACTCACCGCGACGTCTGTCGAGAAGTTTCTGATCGAAAAGTTCGACAGCGTCTCCGACCTGATGCAGCTCTCGGAGGGCGAAGAATCTCGTGCTTTCAGCTTCGATGTAGGAGGGCGTGGATATGTCCTGCGGGTAAATAGCTGCGCCGATGGTTTCTACAAAGATCGTTATGTTTATCGGCACTTTGCATCGGCCGCGCTCCCGATTCCGGAAGTGCTTGACATTGGGGAATTCAGCGAGAGCCTGACCTATTGCATCTCCCGCCGTGCACAGGGTGTCACGTTGCAAGACCTGCCTGAAACCGAACTGCCCGCTGTTCTGCAGCCGGTCGCGGAGGCCATGGATGCGAT…			Fig. 2, S2
4277		plasmid	pLF3FShC2 tetO 18X GFP-C1	tetO 18X and mec-7 basal promoter driving GFP-C1 in an RMCE integration vector	this study	9662	GAAGTTCCTATTCtctagaaaGTATAGGAACTTCATGAAAAAGCCTGAACTCACCGCGACGTCTGTCGAGAAGTTTCTGATCGAAAAGTTCGACAGCGTCTCCGACCTGATGCAGCTCTCGGAGGGCGAAGAATCTCGTGCTTTCAGCTTCGATGTAGGAGGGCGTGGATATGTCCTGCGGGTAAATAGCTGCGCCGATGGTTTCTACAAAGATCGTTATGTTTATCGGCACTTTGCATCGGCCGCGCTCCCGATTCCGGAAGTGCTTGACATTGGGGAATTCAGCGAGAGCCTGACCTATTGCATCTCCCGCCGTGCACAGGGTGTCACGTTGCAAGACCTGCCTGAAACCGAACTGCCCGCTGTTCTGCAGCCGGTCGCGGAGGCCATGGATGCGAT…			Fig. 2, S2
4314		plasmid	DR274 SEC-3' arm rps-2 3'	rps-2 3' UTR in a GG SapI AAG GTA assembly vector	this study	2206	TGGGCCTTTCTTCGGTAGAAAATCAAAGGATCTTCttgagatcctttttttctgcgcgtaatctgctgcttgcaaacaaaaaaaccaccgctaccagcggtggtttgtttgccggatcaagagctaccaactctttttccgaggtaactggcttcagcagagcgcagataccaaatactgttcttctagtgtagccgtagttaggccaccacttcaagaactctgtagcaccgcctacatacctcgctctgctaatcctgttaccagtggctgctgccagtggcgataagtcgtgtcttaccgggttggactcaagacgatagttaccggataaggcgcagcggtcgggctgaacggggggttcgtgcacacagcccagcttggagcgaacgacctaca…			used to make [4811]
4334		plasmid	DR274 AAC CAA QUAS 5X	QUAS 5X in a GG SapI AAC CAA assembly vector	this study	1999	TGGGCCTTTCTTCGGTAGAAAATCAAAGGATCTTCttgagatcctttttttctgcgcgtaatctgctgcttgcaaacaaaaaaaccaccgctaccagcggtggtttgtttgccggatcaagagctaccaactctttttccgaggtaactggcttcagcagagcgcagataccaaatactgttcttctagtgtagccgtagttaggccaccacttcaagaactctgtagcaccgcctacatacctcgctctgctaatcctgttaccagtggctgctgccagtggcgataagtcgtgtcttaccgggttggactcaagacgatagttaccggataaggcgcagcggtcgggctgaacggggggttcgtgcacacagcccagcttggagcgaacgacctaca…			used to make [4359]
4335		plasmid	DR274 AAC TGG QUAS 5X	QUAS 5X in a GG SapI AAC TGG assembly vector	this study	1997	TGGGCCTTTCTTCGGTAGAAAATCAAAGGATCTTCttgagatcctttttttctgcgcgtaatctgctgcttgcaaacaaaaaaaccaccgctaccagcggtggtttgtttgccggatcaagagctaccaactctttttccgaggtaactggcttcagcagagcgcagataccaaatactgttcttctagtgtagccgtagttaggccaccacttcaagaactctgtagcaccgcctacatacctcgctctgctaatcctgttaccagtggctgctgccagtggcgataagtcgtgtcttaccgggttggactcaagacgatagttaccggataaggcgcagcggtcgggctgaacggggggttcgtgcacacagcccagcttggagcgaacgacctaca…			used to make [4358]
4336		plasmid	DR274 CAA TGG QUAS 5X	QUAS 5X in a GG SapI CAA TGG assembly vector	this study	1997	TGGGCCTTTCTTCGGTAGAAAATCAAAGGATCTTCttgagatcctttttttctgcgcgtaatctgctgcttgcaaacaaaaaaaccaccgctaccagcggtggtttgtttgccggatcaagagctaccaactctttttccgaggtaactggcttcagcagagcgcagataccaaatactgttcttctagtgtagccgtagttaggccaccacttcaagaactctgtagcaccgcctacatacctcgctctgctaatcctgttaccagtggctgctgccagtggcgataagtcgtgtcttaccgggttggactcaagacgatagttaccggataaggcgcagcggtcgggctgaacggggggttcgtgcacacagcccagcttggagcgaacgacctaca…			used to make [4359]
4337		plasmid	DR274 CT lexO 8X ∆pes-10	lexO 8X pes-10 basal promoter in a GG SapI GCG ATG assembly vector	this study	2300	TGGGCCTTTCTTCGGTAGAAAATCAAAGGATCTTCttgagatcctttttttctgcgcgtaatctgctgcttgcaaacaaaaaaaccaccgctaccagcggtggtttgtttgccggatcaagagctaccaactctttttccgaggtaactggcttcagcagagcgcagataccaaatactgttcttctagtgtagccgtagttaggccaccacttcaagaactctgtagcaccgcctacatacctcgctctgctaatcctgttaccagtggctgctgccagtggcgataagtcgtgtcttaccgggttggactcaagacgatagttaccggataaggcgcagcggtcgggctgaacggggggttcgtgcacacagcccagcttggagcgaacgacctaca…			used to make [4364]
4341		plasmid	DR274 CT QUAS 5X ∆pes-10	QUAS 5X pes-10 basal promoter in a GG SapI GCG ATG assembly vector	Knoebel, Dour, & Nonet, 2023	2194	TGGGCCTTTCTTCGGTAGAAAATCAAAGGATCTTCttgagatcctttttttctgcgcgtaatctgctgcttgcaaacaaaaaaaccaccgctaccagcggtggtttgtttgccggatcaagagctaccaactctttttccgaggtaactggcttcagcagagcgcagataccaaatactgttcttctagtgtagccgtagttaggccaccacttcaagaactctgtagcaccgcctacatacctcgctctgctaatcctgttaccagtggctgctgccagtggcgataagtcgtgtcttaccgggttggactcaagacgatagttaccggataaggcgcagcggtcgggctgaacggggggttcgtgcacacagcccagcttggagcgaacgacctaca…			used to make [4357], [4358], & [4359]
4345		plasmid	DR274 CT UAS 3X ∆pes-10	UAS 3X pes-10 basal promoter in a GG SapI GCG ATG assembly vector	this study	2165	TGGGCCTTTCTTCGGTAGAAAATCAAAGGATCTTCttgagatcctttttttctgcgcgtaatctgctgcttgcaaacaaaaaaaccaccgctaccagcggtggtttgtttgccggatcaagagctaccaactctttttccgaggtaactggcttcagcagagcgcagataccaaatactgttcttctagtgtagccgtagttaggccaccacttcaagaactctgtagcaccgcctacatacctcgctctgctaatcctgttaccagtggctgctgccagtggcgataagtcgtgtcttaccgggttggactcaagacgatagttaccggataaggcgcagcggtcgggctgaacggggggttcgtgcacacagcccagcttggagcgaacgacctaca…			used to make [4356]
4355		plasmid	pLF3FShCmP	RMHE compatible RMCEwith an attP site	this study	7931	GAAGTTCCTATTCtctagaaaGTATAGGAACTTCATGAAAAAGCCTGAACTCACCGCGACGTCTGTCGAGAAGTTTCTGATCGAAAAGTTCGACAGCGTCTCCGACCTGATGCAGCTCTCGGAGGGCGAAGAATCTCGTGCTTTCAGCTTCGATGTAGGAGGGCGTGGATATGTCCTGCGGGTAAATAGCTGCGCCGATGGTTTCTACAAAGATCGTTATGTTTATCGGCACTTTGCATCGGCCGCGCTCCCGATTCCGGAAGTGCTTGACATTGGGGAATTCAGCGAGAGCCTGACCTATTGCATCTCCCGCCGTGCACAGGGTGTCACGTTGCAAGACCTGCCTGAAACCGAACTGCCCGCTGTTCTGCAGCCGGTCGCGGAGGCCATGGATGCGAT…			used to make [4391], [4392], & [4393]
4356		plasmid	pLF3FShC UAS 6X GFP-C1	UAS 6X driving GFP-C1 in an RMCE integration vector	this study	9370	GAAGTTCCTATTCtctagaaaGTATAGGAACTTCATGAAAAAGCCTGAACTCACCGCGACGTCTGTCGAGAAGTTTCTGATCGAAAAGTTCGACAGCGTCTCCGACCTGATGCAGCTCTCGGAGGGCGAAGAATCTCGTGCTTTCAGCTTCGATGTAGGAGGGCGTGGATATGTCCTGCGGGTAAATAGCTGCGCCGATGGTTTCTACAAAGATCGTTATGTTTATCGGCACTTTGCATCGGCCGCGCTCCCGATTCCGGAAGTGCTTGACATTGGGGAATTCAGCGAGAGCCTGACCTATTGCATCTCCCGCCGTGCACAGGGTGTCACGTTGCAAGACCTGCCTGAAACCGAACTGCCCGCTGTTCTGCAGCCGGTCGCGGAGGCCATGGATGCGAT…			Fig. 2, S2
4357		plasmid	pLF3FShC QUAS 10X GFP-C1	QUAS 10X driving GFP-C1 in an RMCE integration vector	this study	9413	GAAGTTCCTATTCtctagaaaGTATAGGAACTTCATGAAAAAGCCTGAACTCACCGCGACGTCTGTCGAGAAGTTTCTGATCGAAAAGTTCGACAGCGTCTCCGACCTGATGCAGCTCTCGGAGGGCGAAGAATCTCGTGCTTTCAGCTTCGATGTAGGAGGGCGTGGATATGTCCTGCGGGTAAATAGCTGCGCCGATGGTTTCTACAAAGATCGTTATGTTTATCGGCACTTTGCATCGGCCGCGCTCCCGATTCCGGAAGTGCTTGACATTGGGGAATTCAGCGAGAGCCTGACCTATTGCATCTCCCGCCGTGCACAGGGTGTCACGTTGCAAGACCTGCCTGAAACCGAACTGCCCGCTGTTCTGCAGCCGGTCGCGGAGGCCATGGATGCGAT…			Fig. 2, S2
4358		plasmid	pLF3FShC2 QUAS 15X GFP-C1	QUAS 15X driving GFP-C1 in an RMCE integration vector	this study	9527	GAAGTTCCTATTCtctagaaaGTATAGGAACTTCATGAAAAAGCCTGAACTCACCGCGACGTCTGTCGAGAAGTTTCTGATCGAAAAGTTCGACAGCGTCTCCGACCTGATGCAGCTCTCGGAGGGCGAAGAATCTCGTGCTTTCAGCTTCGATGTAGGAGGGCGTGGATATGTCCTGCGGGTAAATAGCTGCGCCGATGGTTTCTACAAAGATCGTTATGTTTATCGGCACTTTGCATCGGCCGCGCTCCCGATTCCGGAAGTGCTTGACATTGGGGAATTCAGCGAGAGCCTGACCTATTGCATCTCCCGCCGTGCACAGGGTGTCACGTTGCAAGACCTGCCTGAAACCGAACTGCCCGCTGTTCTGCAGCCGGTCGCGGAGGCCATGGATGCGAT…			Fig. 2, S2
4359		plasmid	pLF3FShC2 QUAS 20X GFP-C1	QUAS 20X driving GFP-C1 in an RMCE integration vector	this study	9640	GAAGTTCCTATTCtctagaaaGTATAGGAACTTCATGAAAAAGCCTGAACTCACCGCGACGTCTGTCGAGAAGTTTCTGATCGAAAAGTTCGACAGCGTCTCCGACCTGATGCAGCTCTCGGAGGGCGAAGAATCTCGTGCTTTCAGCTTCGATGTAGGAGGGCGTGGATATGTCCTGCGGGTAAATAGCTGCGCCGATGGTTTCTACAAAGATCGTTATGTTTATCGGCACTTTGCATCGGCCGCGCTCCCGATTCCGGAAGTGCTTGACATTGGGGAATTCAGCGAGAGCCTGACCTATTGCATCTCCCGCCGTGCACAGGGTGTCACGTTGCAAGACCTGCCTGAAACCGAACTGCCCGCTGTTCTGCAGCCGGTCGCGGAGGCCATGGATGCGAT…			Fig. 2, S2
4364		plasmid	pLF3FShC2 lexO 18X GFP-C1	lexO 18X pes-10 basal promoter driving GFP-C1 in an RMCE integration vector	this study	9653	GAAGTTCCTATTCtctagaaaGTATAGGAACTTCATGAAAAAGCCTGAACTCACCGCGACGTCTGTCGAGAAGTTTCTGATCGAAAAGTTCGACAGCGTCTCCGACCTGATGCAGCTCTCGGAGGGCGAAGAATCTCGTGCTTTCAGCTTCGATGTAGGAGGGCGTGGATATGTCCTGCGGGTAAATAGCTGCGCCGATGGTTTCTACAAAGATCGTTATGTTTATCGGCACTTTGCATCGGCCGCGCTCCCGATTCCGGAAGTGCTTGACATTGGGGAATTCAGCGAGAGCCTGACCTATTGCATCTCCCGCCGTGCACAGGGTGTCACGTTGCAAGACCTGCCTGAAACCGAACTGCCCGCTGTTCTGCAGCCGGTCGCGGAGGCCATGGATGCGAT…			Fig. 2, S2
4366		synthetic DNA	promRand1	random 400bp fragment with no internal SapI or BsaI sites	this study	422	GGTCTCAgTGGagtgaaattgttgtggccatacttctcgagatctatccaattgaggaattcagaaccgactttcactattccaaaaatgcacgtgaggaacacatttaagacttcgtttcctacaggaattttgatcagaaagtgtgcctcagcctgcataactacagtacatagccatattttgtgcttaatttttgtttttcaaaaataaaaatcaacaagtaataaggacatgtaggcagtttcattgtccaaaaaataaactagagaatttttttgaaaagactttttaatagttaagaatatggaggagttctgatctttggaatgtttcaaattttggctcacaacctaacaaaactttatttgcctaatccagctttgacacttaagtgtt…			used to make [4377]
4367		synthetic DNA	promRand2	random 400bp fragment with no internal SapI or BsaI sites	this study	422	GGTCTCAgTGGcttcgccaaatgaagccgcatacagaacattttagttttaaaattcgatttttctggcaattcaggaagtctaggtttgctgctacaatcaatcatttcatctgaattattttatttaaattttttggcatagtgcatgtcgcatgatttttctttacccatttgttgctctttcttgttttatttgttgacagaaagtatgccgtttgttttttgagcacagatttttcaaaaatgatgcagagatttacagatagtggtggtaccgtaggtaaaaccgctgtatatttttcactcatttttgatctgggatcccaaacttcagaaatttttcagtggaaccgtaaaaaaacaggaacaacttgaaactccgcctttcctcgtgcaa…			used to make [4378]
4368		synthetic DNA	promRand3	random 400bp fragment with no internal SapI or BsaI sites	this study	422	GGTCTCAgTGGgcggcttctgcggaaatgttcaatcagcaatatagtaggttgattgccagaaagtttcctaatgcactcgcccatgcgaatgagcaattaaacatttgtatttcagtgtgtttatctaaagtttgccagaaaactctcaatcttaacaatacaaattataagcactttttacccaactgctacgtttttatctgttatcgataggttggtgctatttttaaactttgggtacatctcgtaagtatgcttcaaaagcaaatcaactgaaaataaaaagttctattttaactatttacagaaaattggatggtgatgaccgtagtctcacatctgaaatgtcggatgattgaacagccattgtttgctgttttacaaaaaatgtatttca…			used to make [4379]
4370		synthetic DNA	p200	two random 200bp fragments with no internal SapI or BsaI sites	this study	448	GGTCTCAgGCGttagcaggttctcatcccaaataagtaattttttcatacttttcattattgttcggttattttgaaattattatcctttaagtgtgttggttcagaccccaacatctaagcaaaaatttttctcataatattgcacaccacaacaattgctggccatttctgttggccattctagataagatttccagagaaacaaaattATGaAGAGACCaagaGGTCTCAgGCGggcgtaaagtcttgtaaaaatagagacaaaatttgccaaggcagattcatttcagaattgtttataattgactctgtgattttagagatttttcgcacccccttgtgaccgacgcaggaaattaataattcaaattaggcagtaattggatctctatatcaa…			used to make [4381] & [4382]
4371		synthetic DNA	p200	two random 200bp fragments with no internal SapI or BsaI sites	this study	300	GGTCTCAGTGGaatCTCTGTCATTGACAGAGccctgtcgcatCCCTGTCAGTGACAGAGggatctgactaCTCTGTCATTGACAGAGgcgattccctCTCTGTCATTGACAGAGatcccccttcgCCCTGTCAGTGACAGAGgacgcgtctggCTCTGTCATTGACAGAGaggGCGAAGAGACCaagaGGTCTCaGGCGAGgtaagtttcGAAGTTCCTATTCtctagaaaGTATAGGAACTTCgttattatactttataaaccgttcatattctgatttttcagAAAAATGAtGAGACC			used to make [4383]
4377		plasmid	DR274 5' arm promRand1	random 400bp fragment in a GG SapI TGG GCG assembly vector	this study	2289	TGGGCCTTTCTTCGGTAGAAAATCAAAGGATCTTCttgagatcctttttttctgcgcgtaatctgctgcttgcaaacaaaaaaaccaccgctaccagcggtggtttgtttgccggatcaagagctaccaactctttttccgaggtaactggcttcagcagagcgcagataccaaatactgttcttctagtgtagccgtagttaggccaccacttcaagaactctgtagcaccgcctacatacctcgctctgctaatcctgttaccagtggctgctgccagtggcgataagtcgtgtcttaccgggttggactcaagacgatagttaccggataaggcgcagcggtcgggctgaacggggggttcgtgcacacagcccagcttggagcgaacgacctaca…			used to make [4421]
4378		plasmid	DR274 5' arm promRand2	random 400bp fragment in a GG SapI TGG GCG assembly vector	this study	2289	TGGGCCTTTCTTCGGTAGAAAATCAAAGGATCTTCttgagatcctttttttctgcgcgtaatctgctgcttgcaaacaaaaaaaccaccgctaccagcggtggtttgtttgccggatcaagagctaccaactctttttccgaggtaactggcttcagcagagcgcagataccaaatactgttcttctagtgtagccgtagttaggccaccacttcaagaactctgtagcaccgcctacatacctcgctctgctaatcctgttaccagtggctgctgccagtggcgataagtcgtgtcttaccgggttggactcaagacgatagttaccggataaggcgcagcggtcgggctgaacggggggttcgtgcacacagcccagcttggagcgaacgacctaca…			used to make [4733]
4379		plasmid	DR274 5' arm promRand3	random 400bp fragment in a GG SapI TGG GCG assembly vector	this study	2289	TGGGCCTTTCTTCGGTAGAAAATCAAAGGATCTTCttgagatcctttttttctgcgcgtaatctgctgcttgcaaacaaaaaaaccaccgctaccagcggtggtttgtttgccggatcaagagctaccaactctttttccgaggtaactggcttcagcagagcgcagataccaaatactgttcttctagtgtagccgtagttaggccaccacttcaagaactctgtagcaccgcctacatacctcgctctgctaatcctgttaccagtggctgctgccagtggcgataagtcgtgtcttaccgggttggactcaagacgatagttaccggataaggcgcagcggtcgggctgaacggggggttcgtgcacacagcccagcttggagcgaacgacctaca…			used to make [4721] & [4777]
4381		plasmid	DR274 CT p200-1	random 200bp fragment in a GG SapI GCG ATG assembly vector	this study	2089	TGGGCCTTTCTTCGGTAGAAAATCAAAGGATCTTCttgagatcctttttttctgcgcgtaatctgctgcttgcaaacaaaaaaaccaccgctaccagcggtggtttgtttgccggatcaagagctaccaactctttttccgaggtaactggcttcagcagagcgcagataccaaatactgttcttctagtgtagccgtagttaggccaccacttcaagaactctgtagcaccgcctacatacctcgctctgctaatcctgttaccagtggctgctgccagtggcgataagtcgtgtcttaccgggttggactcaagacgatagttaccggataaggcgcagcggtcgggctgaacggggggttcgtgcacacagcccagcttggagcgaacgacctaca…			used to make [4391]
4382		plasmid	DR274 CT p200-2	random 200bp fragment in a GG SapI GCG ATG assembly vector	this study	2089	TGGGCCTTTCTTCGGTAGAAAATCAAAGGATCTTCttgagatcctttttttctgcgcgtaatctgctgcttgcaaacaaaaaaaccaccgctaccagcggtggtttgtttgccggatcaagagctaccaactctttttccgaggtaactggcttcagcagagcgcagataccaaatactgttcttctagtgtagccgtagttaggccaccacttcaagaactctgtagcaccgcctacatacctcgctctgctaatcctgttaccagtggctgctgccagtggcgataagtcgtgtcttaccgggttggactcaagacgatagttaccggataaggcgcagcggtcgggctgaacggggggttcgtgcacacagcccagcttggagcgaacgacctaca…			used to make [4392]
4383		plasmid	DR274 CT p200-3	random 200bp fragment in a GG SapI GCG ATG assembly vector	this study	2089	TGGGCCTTTCTTCGGTAGAAAATCAAAGGATCTTCttgagatcctttttttctgcgcgtaatctgctgcttgcaaacaaaaaaaccaccgctaccagcggtggtttgtttgccggatcaagagctaccaactctttttccgaggtaactggcttcagcagagcgcagataccaaatactgttcttctagtgtagccgtagttaggccaccacttcaagaactctgtagcaccgcctacatacctcgctctgctaatcctgttaccagtggctgctgccagtggcgataagtcgtgtcttaccgggttggactcaagacgatagttaccggataaggcgcagcggtcgggctgaacggggggttcgtgcacacagcccagcttggagcgaacgacctaca…			used to make [4393]
4388	200071	plasmid	pHygR2	A rRMCE integration vector for creating nls-scarlet marked lines with hygromycin selection	Nonet, 2023	5966	atcccgctttccagtcgggaaacctgtcgtgccagctgcattaatgaatcggccaacgcgcggggagaggcggtttgcgtattgggcgaattccgcttcctcgctcactgactcgctgcgctcggtcgttcggctgcggcgagcggtatcagctcactcaaaggcggtaatacggttatccacagaatcaggggataacgcaggaaagaacatgtgagcaaaaggccagcaaaaggccaggaaccgtaaaaaggccgcgttgctggcgtttttccataggctccgcccccctgacgagcatcacaaaaatcgacgctcaagtcagaggtggcgaaacccgacaggactataaagataccaggcgtttccccctggaagctccctcgtgcgctctcctgt…			used to make [4579], [4651], [4652], [4657], [4658], [4828], [4829], [4830], [4831], [4832], & [4833]
4391		plasmid	pLF3FShCmP tetO 7X p200-1 GFP-C1	tetO 7X and a random 200bp AT-rich promoter in an RMCE integration vector	this study	9576	GAAGTTCCTATTCtctagaaaGTATAGGAACTTCATGAAAAAGCCTGAACTCACCGCGACGTCTGTCGAGAAGTTTCTGATCGAAAAGTTCGACAGCGTCTCCGACCTGATGCAGCTCTCGGAGGGCGAAGAATCTCGTGCTTTCAGCTTCGATGTAGGAGGGCGTGGATATGTCCTGCGGGTAAATAGCTGCGCCGATGGTTTCTACAAAGATCGTTATGTTTATCGGCACTTTGCATCGGCCGCGCTCCCGATTCCGGAAGTGCTTGACATTGGGGAATTCAGCGAGAGCCTGACCTATTGCATCTCCCGCCGTGCACAGGGTGTCACGTTGCAAGACCTGCCTGAAACCGAACTGCCCGCTGTTCTGCAGCCGGTCGCGGAGGCCATGGATGCGAT…			Fig. 6, S6
4392		plasmid	pLF3FShCmP tetO 7X p200-2 GFP-C1	tetO 7X and a random 200bp AT-rich promoter in an RMCE integration vector	this study	9576	GAAGTTCCTATTCtctagaaaGTATAGGAACTTCATGAAAAAGCCTGAACTCACCGCGACGTCTGTCGAGAAGTTTCTGATCGAAAAGTTCGACAGCGTCTCCGACCTGATGCAGCTCTCGGAGGGCGAAGAATCTCGTGCTTTCAGCTTCGATGTAGGAGGGCGTGGATATGTCCTGCGGGTAAATAGCTGCGCCGATGGTTTCTACAAAGATCGTTATGTTTATCGGCACTTTGCATCGGCCGCGCTCCCGATTCCGGAAGTGCTTGACATTGGGGAATTCAGCGAGAGCCTGACCTATTGCATCTCCCGCCGTGCACAGGGTGTCACGTTGCAAGACCTGCCTGAAACCGAACTGCCCGCTGTTCTGCAGCCGGTCGCGGAGGCCATGGATGCGAT…			Fig. 6, S6
4393		plasmid	pLF3FShCmP tetO 7X p200-3 GFP-C1	tetO 7X and a random 200bp AT-rich promoter in an RMCE integration vector	this study	9576	GAAGTTCCTATTCtctagaaaGTATAGGAACTTCATGAAAAAGCCTGAACTCACCGCGACGTCTGTCGAGAAGTTTCTGATCGAAAAGTTCGACAGCGTCTCCGACCTGATGCAGCTCTCGGAGGGCGAAGAATCTCGTGCTTTCAGCTTCGATGTAGGAGGGCGTGGATATGTCCTGCGGGTAAATAGCTGCGCCGATGGTTTCTACAAAGATCGTTATGTTTATCGGCACTTTGCATCGGCCGCGCTCCCGATTCCGGAAGTGCTTGACATTGGGGAATTCAGCGAGAGCCTGACCTATTGCATCTCCCGCCGTGCACAGGGTGTCACGTTGCAAGACCTGCCTGAAACCGAACTGCCCGCTGTTCTGCAGCCGGTCGCGGAGGCCATGGATGCGAT…			Fig. 6, S6
4404	200069	plasmid	pHygG2r	derivative of the hygR RMCE vector pHygG2 with the polylinker reversed	Nonet, 2023	6039	gatcccgctttccagtcgggaaacctgtcgtgccagctgcattaatgaatcggccaacgcgcggggagaggcggtttgcgtattgggcgaattccgcttcctcgctcactgactcgctgcgctcggtcgttcggctgcggcgagcggtatcagctcactcaaaggcggtaatacggttatccacagaatcaggggataacgcaggaaagaacatgtgagcaaaaggccagcaaaaggccaggaaccgtaaaaaggccgcgttgctggcgtttttccataggctccgcccccctgacgagcatcacaaaaatcgacgctcaagtcagaggtggcgaaacccgacaggactataaagataccaggcgtttccccctggaagctccctcgtgcgctctcctg…			used to make [4481]
4409		plasmid	DR274 5' 900 PATC	a 900 bp PATC-rich sequence from an F54A3 intron in a GG SapI TGG GCG assembly vector	this study	2850	TGGGCCTTTCTTCGGTAGAAAATCAAAGGATCTTCttgagatcctttttttctgcgcgtaatctgctgcttgcaaacaaaaaaaccaccgctaccagcggtggtttgtttgccggatcaagagctaccaactctttttccgaggtaactggcttcagcagagcgcagataccaaatactgttcttctagtgtagccgtagttaggccaccacttcaagaactctgtagcaccgcctacatacctcgctctgctaatcctgttaccagtggctgctgccagtggcgataagtcgtgtcttaccgggttggactcaagacgatagttaccggataaggcgcagcggtcgggctgaacggggggttcgtgcacacagcccagcttggagcgaacgacctaca…			used to make [4424]
4421		plasmid	pLF3FShC2 tetO 7X 400R1 ∆mec-7 GFP-C1	tetO 7X driving nls-GFP with a 400bp random AT-rich sequence between the tetO and basal promoter in an RMCE vector	this study	9857	GAAGTTCCTATTCtctagaaaGTATAGGAACTTCATGAAAAAGCCTGAACTCACCGCGACGTCTGTCGAGAAGTTTCTGATCGAAAAGTTCGACAGCGTCTCCGACCTGATGCAGCTCTCGGAGGGCGAAGAATCTCGTGCTTTCAGCTTCGATGTAGGAGGGCGTGGATATGTCCTGCGGGTAAATAGCTGCGCCGATGGTTTCTACAAAGATCGTTATGTTTATCGGCACTTTGCATCGGCCGCGCTCCCGATTCCGGAAGTGCTTGACATTGGGGAATTCAGCGAGAGCCTGACCTATTGCATCTCCCGCCGTGCACAGGGTGTCACGTTGCAAGACCTGCCTGAAACCGAACTGCCCGCTGTTCTGCAGCCGGTCGCGGAGGCCATGGATGCGAT…			Fig. 3, 6, S6
4423		plasmid	pLF3FShC2 tetO 7X 400R3 ∆mec-7 GFP-C1	tetO 7X driving nls-GFP with a 400bp random AT-rich sequence between the tetO and basal promoter in an RMCE vector	this study	9857	GAAGTTCCTATTCtctagaaaGTATAGGAACTTCATGAAAAAGCCTGAACTCACCGCGACGTCTGTCGAGAAGTTTCTGATCGAAAAGTTCGACAGCGTCTCCGACCTGATGCAGCTCTCGGAGGGCGAAGAATCTCGTGCTTTCAGCTTCGATGTAGGAGGGCGTGGATATGTCCTGCGGGTAAATAGCTGCGCCGATGGTTTCTACAAAGATCGTTATGTTTATCGGCACTTTGCATCGGCCGCGCTCCCGATTCCGGAAGTGCTTGACATTGGGGAATTCAGCGAGAGCCTGACCTATTGCATCTCCCGCCGTGCACAGGGTGTCACGTTGCAAGACCTGCCTGAAACCGAACTGCCCGCTGTTCTGCAGCCGGTCGCGGAGGCCATGGATGCGAT…			Fig. 3
4424		plasmid	pLF3FShC2 tetO 7X 900 PATC ∆mec-7 GFP-C1	tetO 7X driving nls-GFP with a 900bp PATC-rich sequence between the tetO and basal promoter in an RMCE vector	this study	10418	GAAGTTCCTATTCtctagaaaGTATAGGAACTTCATGAAAAAGCCTGAACTCACCGCGACGTCTGTCGAGAAGTTTCTGATCGAAAAGTTCGACAGCGTCTCCGACCTGATGCAGCTCTCGGAGGGCGAAGAATCTCGTGCTTTCAGCTTCGATGTAGGAGGGCGTGGATATGTCCTGCGGGTAAATAGCTGCGCCGATGGTTTCTACAAAGATCGTTATGTTTATCGGCACTTTGCATCGGCCGCGCTCCCGATTCCGGAAGTGCTTGACATTGGGGAATTCAGCGAGAGCCTGACCTATTGCATCTCCCGCCGTGCACAGGGTGTCACGTTGCAAGACCTGCCTGAAACCGAACTGCCCGCTGTTCTGCAGCCGGTCGCGGAGGCCATGGATGCGAT…			Fig. 3
4428		plasmid	pHygR3	A rRMCE integration vector for creating nls-scarlet marked lines with hygromycin selection	Nonet, 2023	5966	cccagttgtcctcgaacaGGTCcATTTTTGCTTTCGTCGTAAATCTACACACGCGTCTCTTCCGTGCGAGAGTCCAAGCCAGCAGCCAAATTCGTTGACTGAGTATTCAACGTTTATACGTTGTCGGCAACGAGAAATAGGAAAATGCATCGGGAAATGTTCTTTTTTCGATTTTTTCCAAGGTTTTGACAAATTTTACCACGAATTTTGCTATGTTTTCAATTAAAAAATATGTTATTCAACTGTTTCTATGAGGAAAATAAGGCTTTGCATGTAATTTTCTTATTCAGCATAATTTTTAATTAATTTGAATTTTCTGTCCTAACGTTTATTTTGTTTTCTTGGTTATGACTGATCTGAAATTAATTTTTGAATTTTAAGGTAATATGTCAGGCGGTG…			used to make [4483], [4487], [4488], [4489], & [4490]
4432		plasmid	pHygG7	A pHygG vector using GFP-C1 instead of mNG as the marker	Nonet, 2023	5981	AAGtagatcaactgctctaattccatctcgtttctctcttttctttcaatctctttacccgtttctcttcccctacgtcccccaaacctaccactgcacagtaacacatacacattcaacgtgtcacaataaaagcccatcaacaccttctctgttgttttttttcttcaaatgcatttttttcactttgtttaataatttttacgcatcggatttgtaggatagtggaaatttgtccttcaatgcttcaattgattcgacacttctcaatatttttgatcaataaaccattgattttctatttagaagaagatcactgtaaataacaccaaaaacatcacagcaaaaaaactcccactcaattatattactgtttttattgaaactagaataaatttg…			used to make [4484]
4441	200219	plasmid	pHygG6	An rRMCE integration vector for creating nls-GFP marked lines with hygromycin selection	Nonet, 2023	5981	atcccgctttccagtcgggaaacctgtcgtgccagctgcattaatgaatcggccaacgcgcggggagaggcggtttgcgtattgggcgaattccgcttcctcgctcactgactcgctgcgctcggtcgttcggctgcggcgagcggtatcagctcactcaaaggcggtaatacggttatccacagaatcaggggataacgcaggaaagaacatgtgagcaaaaggccagcaaaaggccaggaaccgtaaaaaggccgcgttgctggcgtttttccataggctccgcccccctgacgagcatcacaaaaatcgacgctcaagtcagaggtggcgaaacccgacaggactataaagataccaggcgtttccccctggaagctccctcgtgcgctctcctgt…			used to make [4837] & [4838]
4452		plasmid	DR274 CT ∆act-4	act-4 basal promoter in a GG SapI GCG ATG assembly vector	this study	2034	TGGGCCTTTCTTCGGTAGAAAATCAAAGGATCTTCttgagatcctttttttctgcgcgtaatctgctgcttgcaaacaaaaaaaccaccgctaccagcggtggtttgtttgccggatcaagagctaccaactctttttccgaggtaactggcttcagcagagcgcagataccaaatactgttcttctagtgtagccgtagttaggccaccacttcaagaactctgtagcaccgcctacatacctcgctctgctaatcctgttaccagtggctgctgccagtggcgataagtcgtgtcttaccgggttggactcaagacgatagttaccggataaggcgcagcggtcgggctgaacggggggttcgtgcacacagcccagcttggagcgaacgacctaca…			used to make [4487] & [4833]
4453		plasmid	DR274 CT ∆pals-5	pals-5 basal promoter in a GG SapI GCG ATG assembly vector	this study	2043	TGGGCCTTTCTTCGGTAGAAAATCAAAGGATCTTCttgagatcctttttttctgcgcgtaatctgctgcttgcaaacaaaaaaaccaccgctaccagcggtggtttgtttgccggatcaagagctaccaactctttttccgaggtaactggcttcagcagagcgcagataccaaatactgttcttctagtgtagccgtagttaggccaccacttcaagaactctgtagcaccgcctacatacctcgctctgctaatcctgttaccagtggctgctgccagtggcgataagtcgtgtcttaccgggttggactcaagacgatagttaccggataaggcgcagcggtcgggctgaacggggggttcgtgcacacagcccagcttggagcgaacgacctaca…			used to make [4488]
4454		plasmid	DR274 CT ∆tbb-2	tbb-2 basal promoter in a GG SapI GCG ATG assembly vector	this study	2021	TGGGCCTTTCTTCGGTAGAAAATCAAAGGATCTTCttgagatcctttttttctgcgcgtaatctgctgcttgcaaacaaaaaaaccaccgctaccagcggtggtttgtttgccggatcaagagctaccaactctttttccgaggtaactggcttcagcagagcgcagataccaaatactgttcttctagtgtagccgtagttaggccaccacttcaagaactctgtagcaccgcctacatacctcgctctgctaatcctgttaccagtggctgctgccagtggcgataagtcgtgtcttaccgggttggactcaagacgatagttaccggataaggcgcagcggtcgggctgaacggggggttcgtgcacacagcccagcttggagcgaacgacctaca…			used to make [4489]
4476		plasmid	DR274 CT ∆lys-8	lys-8 basal promoter in a GG SapI GCG ATG assembly vector	this study	2019	TGGGCCTTTCTTCGGTAGAAAATCAAAGGATCTTCttgagatcctttttttctgcgcgtaatctgctgcttgcaaacaaaaaaaccaccgctaccagcggtggtttgtttgccggatcaagagctaccaactctttttccgaggtaactggcttcagcagagcgcagataccaaatactgttcttctagtgtagccgtagttaggccaccacttcaagaactctgtagcaccgcctacatacctcgctctgctaatcctgttaccagtggctgctgccagtggcgataagtcgtgtcttaccgggttggactcaagacgatagttaccggataaggcgcagcggtcgggctgaacggggggttcgtgcacacagcccagcttggagcgaacgacctaca…			used to make [4490]
4481		plasmid	pHygG2r attPf	hygR RMCE integration vector with a full attP site for creating RMHE attP compatible RMCE insertions	this study	6262	TGGctgtcgtgccagctgcattaatgaatcggccaacgcgcggggagaggcggtttgcgtattgggcgaattccgcttcctcgctcactgactcgctgcgctcggtcgttcggctgcggcgagcggtatcagctcactcaaaggcggtaatacggttatccacagaatcaggggataacgcaggaaagaacatgtgagcaaaaggccagcaaaaggccaggaaccgtaaaaaggccgcgttgctggcgtttttccataggctccgcccccctgacgagcatcacaaaaatcgacgctcaagtcagaggtggcgaaacccgacaggactataaagataccaggcgtttccccctggaagctccctcgtgcgctctcctgttccgaccctgccgcttaccg…			used to make [4575]
4483		plasmid	pHygRP3	derivative of pHygR3 that has a full attP site	this study	6547	cccagttgtcctcgaacaGGTCcATTTTTGCTTTCGTCGTAAATCTACACACGCGTCTCTTCCGTGCGAGAGTCCAAGCCAGCAGCCAAATTCGTTGACTGAGTATTCAACGTTTATACGTTGTCGGCAACGAGAAATAGGAAAATGCATCGGGAAATGTTCTTTTTTCGATTTTTTCCAAGGTTTTGACAAATTTTACCACGAATTTTGCTATGTTTTCAATTAAAAAATATGTTATTCAACTGTTTCTATGAGGAAAATAAGGCTTTGCATGTAATTTTCTTATTCAGCATAATTTTTAATTAATTTGAATTTTCTGTCCTAACGTTTATTTTGTTTTCTTGGTTATGACTGATCTGAAATTAATTTTTGAATTTTAAGGTAATATGTCAGGCGGTG…			used to make [4579]
4484		plasmid	pHygGP7	derivative of pHygG7 that has a full attP site	this study	6562	AAGtagatcaactgctctaattccatctcgtttctctcttttctttcaatctctttacccgtttctcttcccctacgtcccccaaacctaccactgcacagtaacacatacacattcaacgtgtcacaataaaagcccatcaacaccttctctgttgttttttttcttcaaatgcatttttttcactttgtttaataatttttacgcatcggatttgtaggatagtggaaatttgtccttcaatgcttcaattgattcgacacttctcaatatttttgatcaataaaccattgattttctatttagaagaagatcactgtaaataacaccaaaaacatcacagcaaaaaaactcccactcaattatattactgtttttattgaaactagaataaatttg…			used to make [4575]
4487		plasmid	pHygR3 tetO 7X ∆act-4 GFP-C1	tetO 7X enhancer and act-4 basal promoter driving GFP-C1 in a hygR RMCE integration vector	this study	7556	cccagttgtcctcgaacaGGTCcATTTTTGCTTTCGTCGTAAATCTACACACGCGTCTCTTCCGTGCGAGAGTCCAAGCCAGCAGCCAAATTCGTTGACTGAGTATTCAACGTTTATACGTTGTCGGCAACGAGAAATAGGAAAATGCATCGGGAAATGTTCTTTTTTCGATTTTTTCCAAGGTTTTGACAAATTTTACCACGAATTTTGCTATGTTTTCAATTAAAAAATATGTTATTCAACTGTTTCTATGAGGAAAATAAGGCTTTGCATGTAATTTTCTTATTCAGCATAATTTTTAATTAATTTGAATTTTCTGTCCTAACGTTTATTTTGTTTTCTTGGTTATGACTGATCTGAAATTAATTTTTGAATTTTAAGGTAATATGTCAGGCGGTG…			used to make [4804], [4805], & [4806]
4488		plasmid	pHygR3 tetO 7X ∆pals-5 GFP-C1	tetO 7X enhancer and pals-5 basal promoter driving GFP-C1 in a hygR RMCE integration vector	this study	7568	cccagttgtcctcgaacaGGTCcATTTTTGCTTTCGTCGTAAATCTACACACGCGTCTCTTCCGTGCGAGAGTCCAAGCCAGCAGCCAAATTCGTTGACTGAGTATTCAACGTTTATACGTTGTCGGCAACGAGAAATAGGAAAATGCATCGGGAAATGTTCTTTTTTCGATTTTTTCCAAGGTTTTGACAAATTTTACCACGAATTTTGCTATGTTTTCAATTAAAAAATATGTTATTCAACTGTTTCTATGAGGAAAATAAGGCTTTGCATGTAATTTTCTTATTCAGCATAATTTTTAATTAATTTGAATTTTCTGTCCTAACGTTTATTTTGTTTTCTTGGTTATGACTGATCTGAAATTAATTTTTGAATTTTAAGGTAATATGTCAGGCGGTG…			for Fig. 5
4489		plasmid	pHygR3 tetO 7X ∆tbb-2 GFP-C1	tetO 7X enhancer and tbb-2 basal promoter driving GFP-C1 in a hygR RMCE integration vector	this study	7543	cccagttgtcctcgaacaGGTCcATTTTTGCTTTCGTCGTAAATCTACACACGCGTCTCTTCCGTGCGAGAGTCCAAGCCAGCAGCCAAATTCGTTGACTGAGTATTCAACGTTTATACGTTGTCGGCAACGAGAAATAGGAAAATGCATCGGGAAATGTTCTTTTTTCGATTTTTTCCAAGGTTTTGACAAATTTTACCACGAATTTTGCTATGTTTTCAATTAAAAAATATGTTATTCAACTGTTTCTATGAGGAAAATAAGGCTTTGCATGTAATTTTCTTATTCAGCATAATTTTTAATTAATTTGAATTTTCTGTCCTAACGTTTATTTTGTTTTCTTGGTTATGACTGATCTGAAATTAATTTTTGAATTTTAAGGTAATATGTCAGGCGGTG…			for Fig. 5
4490		plasmid	pHygR3 tetO 7X ∆lys-8 GFP-C1	tetO 7X enhancer and lys-8 basal promoter driving GFP-C1 in a hygR RMCE integration vector	this study	7541	cccagttgtcctcgaacaGGTCcATTTTTGCTTTCGTCGTAAATCTACACACGCGTCTCTTCCGTGCGAGAGTCCAAGCCAGCAGCCAAATTCGTTGACTGAGTATTCAACGTTTATACGTTGTCGGCAACGAGAAATAGGAAAATGCATCGGGAAATGTTCTTTTTTCGATTTTTTCCAAGGTTTTGACAAATTTTACCACGAATTTTGCTATGTTTTCAATTAAAAAATATGTTATTCAACTGTTTCTATGAGGAAAATAAGGCTTTGCATGTAATTTTCTTATTCAGCATAATTTTTAATTAATTTGAATTTTCTGTCCTAACGTTTATTTTGTTTTCTTGGTTATGACTGATCTGAAATTAATTTTTGAATTTTAAGGTAATATGTCAGGCGGTG…			for Fig. 5
4574		plasmid	pHygGB6	GFP rRMCE vector that contains an attB site 3' of the MCS	Nonet, 2024	6592	atcccgctttccagtcgggaaacctgtcgtgccagctgcattaatgaatcggccaacgcgcggggagaggcggtttgcgtattgggcgaattccgcttcctcgctcactgactcgctgcgctcggtcgttcggctgcggcgagcggtatcagctcactcaaaggcggtaatacggttatccacagaatcaggggataacgcaggaaagaacatgtgagcaaaaggccagcaaaaggccaggaaccgtaaaaaggccgcgttgctggcgtttttccataggctccgcccccctgacgagcatcacaaaaatcgacgctcaagtcagaggtggcgaaacccgacaggactataaagataccaggcgtttccccctggaagctccctcgtgcgctctcctgt…			used to make [4754], [4755]
4575		plasmid	pHygGP6	derivative of pHygGP7 with hygR in opposite direction	this study	6562	atcccgctttccagtcgggaaacctgtcgtgccagctgcattaatgaatcggccaacgcgcggggagaggcggtttgcgtattgggcgaattccgcttcctcgctcactgactcgctgcgctcggtcgttcggctgcggcgagcggtatcagctcactcaaaggcggtaatacggttatccacagaatcaggggataacgcaggaaagaacatgtgagcaaaaggccagcaaaaggccaggaaccgtaaaaaggccgcgttgctggcgtttttccataggctccgcccccctgacgagcatcacaaaaatcgacgctcaagtcagaggtggcgaaacccgacaggactataaagataccaggcgtttccccctggaagctccctcgtgcgctctcctgt…			used to make [4591], [4674], [4782], & [4878]
4579		plasmid	pHygRP2	derivative of pHygRP3 with hygR in opposite direction	this study	6547	atcccgctttccagtcgggaaacctgtcgtgccagctgcattaatgaatcggccaacgcgcggggagaggcggtttgcgtattgggcgaattccgcttcctcgctcactgactcgctgcgctcggtcgttcggctgcggcgagcggtatcagctcactcaaaggcggtaatacggttatccacagaatcaggggataacgcaggaaagaacatgtgagcaaaaggccagcaaaaggccaggaaccgtaaaaaggccgcgttgctggcgtttttccataggctccgcccccctgacgagcatcacaaaaatcgacgctcaagtcagaggtggcgaaacccgacaggactataaagataccaggcgtttccccctggaagctccctcgtgcgctctcctgt…			used to make [5034], & [5035]
4591		plasmid	pHygGP16	derivative of pHyGP6 with an AAC GTA SapI polylinker instead of TGG GTA	this study	6564	atcccgctttccagtcgggaaacctgtcgtgccagctgcattaatgaatcggccaacgcgcggggagaggcggtttgcgtattgggcgaattccgcttcctcgctcactgactcgctgcgctcggtcgttcggctgcggcgagcggtatcagctcactcaaaggcggtaatacggttatccacagaatcaggggataacgcaggaaagaacatgtgagcaaaaggccagcaaaaggccaggaaccgtaaaaaggccgcgttgctggcgtttttccataggctccgcccccctgacgagcatcacaaaaatcgacgctcaagtcagaggtggcgaaacccgacaggactataaagataccaggcgtttccccctggaagctccctcgtgcgctctcctgt…			used to make [4669]
4613		plasmid	pHygG12	An rRMCE integration vector for creating nls-mNG marked lines with hygromycin selection	Knoebel, Dour, & Nonet, 2023	6032	gtcgtgccagctgcattaatgaatcggccaacgcgcggggagaggcggtttgcgtattgggcgaattccgcttcctcgctcactgactcgctgcgctcggtcgttcggctgcggcgagcggtatcagctcactcaaaggcggtaatacggttatccacagaatcaggggataacgcaggaaagaacatgtgagcaaaaggccagcaaaaggccaggaaccgtaaaaaggccgcgttgctggcgtttttccataggctccgcccccctgacgagcatcacaaaaatcgacgctcaagtcagaggtggcgaaacccgacaggactataaagataccaggcgtttccccctggaagctccctcgtgcgctctcctgttccgaccctgccgcttaccggatac…			used to make [4721]
4624		synthetic DNA	tetOA 4X	4 tetO sites spaced 3bp apart on the 5' end	this study	514	GGTCTCAgTGGagtgaaattgttgtggccatacttctcgagatctatccaattgaggaattcagaaccgactttcactattccaaaaatgcacgtgaggaacacatttaagacttcgtttcctacaggaattttgatcagaaagtgtgcctcagcctgcataactacagtacatagccatattttgtgcttaatttttgtttttcaaaaataaaaatcaacaagtaataaggacatgtaggcagtttcattgtccaaaaaataaactagagaatttttttgaaaagactttttaatagttaagaatatggaggagtccctatcagtgatagagttcccctatcagtgatagagctaccctatcagtgatagagtatccctatcagtgatagagagtgtt…			used to make [4635] & [4648]
4625		synthetic DNA	tetOB 4X	4 tetO sites spaced 25bp apart on the 5' end	this study	592	GGTCTCAgTGGagtgaaattgttgtggccatacttctcgagatctatccaattgaggaattcagaaccgactttcactattccaaaaatgcacgtgaggaacacatttaagacttcgtttcctacaggaattttgatcagaaagtgtgcctcagcctgcataactacagtacatagccatattttgtgcttaatttttgtttttcaaaaataaaaatcaacaagtaataaggacatgtaggcagtttcatccctatcagtgatagagagagaatttttttgaaaagacttttccctatcagtgatagaggaggagttctgatctttggaatgttccctatcagtgatagagacctaacaaaactttatttgcctaaccctatcagtgatagagagtgtt…			used to make [4636] & [4639]
4626		synthetic DNA	tetOC 4X	4 tetO sites spaced 50bp apart on the 5' end	this study	592	GGTCTCAgTGGagtgaaattgttgtggccatacttctcgagatctatccaattgaggaattcagaaccgactttcactattccaaaaatgcacgtgaggaacacatttaagacttcgtttcctacaggaattttgatcagaaagtgtgcctcagcctgcataactacagtacatagccatattttgtgcttaatttccctatcagtgatagagaaatcaacaagtaataaggacatgtaggcagtttcattgtccaccctatcagtgatagagtttttttgaaaagactttttaatagttaagaatatggaggagtccctatcagtgatagagttcaaattttggctcacaacctaacaaaactttatttgcctaaccctatcagtgatagagagtgtt…			used to make [4637] & [4640]
4627		synthetic DNA	tetOD 4X	4 tetO sites spaced 93bp apart on the 5' end	this study	514	GGTCTCAgTGGagtgaaattgttgtggccatacttctcgagatctaccctatcagtgatagaggaaccgactttcactattccaaaaatgcacgtgaggaacacatttaagacttcgtttcctacaggaattttgatcagaaagtgtgcctcagccccctatcagtgatagagtagccatattttgtgcttaatttttgtttttcaaaaataaaaatcaacaagtaataaggacatgtaggcagtttcattgtccaaaaaataaacccctatcagtgatagagaagactttttaatagttaagaatatggaggagttctgatctttggaatgtttcaaattttggctcacaacctaacaaaactttatttgcctaaccctatcagtgatagagagtgtt…			used to make [4638] & [4648]
4635		plasmid	DR274 5' arm tetOA 4X	tetO 4X with 3bp spacing in a GG SapI TGG GCG assembly vector	this study	2289	TGGGCCTTTCTTCGGTAGAAAATCAAAGGATCTTCttgagatcctttttttctgcgcgtaatctgctgcttgcaaacaaaaaaaccaccgctaccagcggtggtttgtttgccggatcaagagctaccaactctttttccgaggtaactggcttcagcagagcgcagataccaaatactgttcttctagtgtagccgtagttaggccaccacttcaagaactctgtagcaccgcctacatacctcgctctgctaatcctgttaccagtggctgctgccagtggcgataagtcgtgtcttaccgggttggactcaagacgatagttaccggataaggcgcagcggtcgggctgaacggggggttcgtgcacacagcccagcttggagcgaacgacctaca…			used to make [4651]
4636		plasmid	DR274 5' arm tetOB 4X	tetO 4X with 25bp spacing in a GG SapI TGG GCG assembly vector	this study	2289	TGGGCCTTTCTTCGGTAGAAAATCAAAGGATCTTCttgagatcctttttttctgcgcgtaatctgctgcttgcaaacaaaaaaaccaccgctaccagcggtggtttgtttgccggatcaagagctaccaactctttttccgaggtaactggcttcagcagagcgcagataccaaatactgttcttctagtgtagccgtagttaggccaccacttcaagaactctgtagcaccgcctacatacctcgctctgctaatcctgttaccagtggctgctgccagtggcgataagtcgtgtcttaccgggttggactcaagacgatagttaccggataaggcgcagcggtcgggctgaacggggggttcgtgcacacagcccagcttggagcgaacgacctaca…			used to make [4657]
4637		plasmid	DR274 5' arm tetOC 4X	tetO 4X with 50bp spacing a GG SapI TGG GCG assembly vector	this study	2289	gTGGagtgaaattgttgtggccatacttctcgagatctatccaattgaggaattcagaaccgactttcactattccaaaaatgcacgtgaggaacacatttaagacttcgtttcctacaggaattttgatcagaaagtgtgcctcagcctgcataactacagtacatagccatattttgtgcttaatttccctatcagtgatagagaaatcaacaagtaataaggacatgtaggcagtttcattgtccaccctatcagtgatagagtttttttgaaaagactttttaatagttaagaatatggaggagtccctatcagtgatagagttcaaattttggctcacaacctaacaaaactttatttgcctaaccctatcagtgatagagagtgttcgctgct…			used to make [4658]
4638		plasmid	DR274 5' arm tetOD 4X	tetO 4X with 93bp spacing in a GG SapI TGG GCG assembly vector	this study	2289	TGGGCCTTTCTTCGGTAGAAAATCAAAGGATCTTCttgagatcctttttttctgcgcgtaatctgctgcttgcaaacaaaaaaaccaccgctaccagcggtggtttgtttgccggatcaagagctaccaactctttttccgaggtaactggcttcagcagagcgcagataccaaatactgttcttctagtgtagccgtagttaggccaccacttcaagaactctgtagcaccgcctacatacctcgctctgctaatcctgttaccagtggctgctgccagtggcgataagtcgtgtcttaccgggttggactcaagacgatagttaccggataaggcgcagcggtcgggctgaacggggggttcgtgcacacagcccagcttggagcgaacgacctaca…			used to make [4652]
4639		plasmid	DR274 CAA TGG lexO 6X	lexO 6X in a GG SapI CAA TGG assembly vector	this study	2034	TGGGCCTTTCTTCGGTAGAAAATCAAAGGATCTTCttgagatcctttttttctgcgcgtaatctgctgcttgcaaacaaaaaaaccaccgctaccagcggtggtttgtttgccggatcaagagctaccaactctttttccgaggtaactggcttcagcagagcgcagataccaaatactgttcttctagtgtagccgtagttaggccaccacttcaagaactctgtagcaccgcctacatacctcgctctgctaatcctgttaccagtggctgctgccagtggcgataagtcgtgtcttaccgggttggactcaagacgatagttaccggataaggcgcagcggtcgggctgaacggggggttcgtgcacacagcccagcttggagcgaacgacctaca…			used to make [4669]
4640		plasmid	DR274 AAC CAA lexO 6X	lexO 6X in a GG SapI AAC CAA assembly vector	this study	2034	TGGGCCTTTCTTCGGTAGAAAATCAAAGGATCTTCttgagatcctttttttctgcgcgtaatctgctgcttgcaaacaaaaaaaccaccgctaccagcggtggtttgtttgccggatcaagagctaccaactctttttccgaggtaactggcttcagcagagcgcagataccaaatactgttcttctagtgtagccgtagttaggccaccacttcaagaactctgtagcaccgcctacatacctcgctctgctaatcctgttaccagtggctgctgccagtggcgataagtcgtgtcttaccgggttggactcaagacgatagttaccggataaggcgcagcggtcgggctgaacggggggttcgtgcacacagcccagcttggagcgaacgacctaca…			used to make [4669]
4648		plasmid	DR274 5' arm lexO 6X	lexO 6X in a GG SapI TGG GCG assembly vector	this study	2027	TGGGCCTTTCTTCGGTAGAAAATCAAAGGATCTTCttgagatcctttttttctgcgcgtaatctgctgcttgcaaacaaaaaaaccaccgctaccagcggtggtttgtttgccggatcaagagctaccaactctttttccgaggtaactggcttcagcagagcgcagataccaaatactgttcttctagtgtagccgtagttaggccaccacttcaagaactctgtagcaccgcctacatacctcgctctgctaatcctgttaccagtggctgctgccagtggcgataagtcgtgtcttaccgggttggactcaagacgatagttaccggataaggcgcagcggtcgggctgaacggggggttcgtgcacacagcccagcttggagcgaacgacctaca…			used to make [4669] & [4674]
4651		plasmid	pHygR2 tetOA 4X mNG	tetOA 4X spaced 3bp apart driving mNG in an RMCE integration vector	this study	7726	atcccgctttccagtcgggaaacctgtcgtgccagctgcattaatgaatcggccaacgcgcggggagaggcggtttgcgtattgggcgaattccgcttcctcgctcactgactcgctgcgctcggtcgttcggctgcggcgagcggtatcagctcactcaaaggcggtaatacggttatccacagaatcaggggataacgcaggaaagaacatgtgagcaaaaggccagcaaaaggccaggaaccgtaaaaaggccgcgttgctggcgtttttccataggctccgcccccctgacgagcatcacaaaaatcgacgctcaagtcagaggtggcgaaacccgacaggactataaagataccaggcgtttccccctggaagctccctcgtgcgctctcctgt…			Fig. 3, S3, & used to make [4756]
4652		plasmid	pHygR2 tetOD 4X mNG	tetOD 4X spaced 93bp apart driving mNG in an RMCE integration vector	this study	7726	atcccgctttccagtcgggaaacctgtcgtgccagctgcattaatgaatcggccaacgcgcggggagaggcggtttgcgtattgggcgaattccgcttcctcgctcactgactcgctgcgctcggtcgttcggctgcggcgagcggtatcagctcactcaaaggcggtaatacggttatccacagaatcaggggataacgcaggaaagaacatgtgagcaaaaggccagcaaaaggccaggaaccgtaaaaaggccgcgttgctggcgtttttccataggctccgcccccctgacgagcatcacaaaaatcgacgctcaagtcagaggtggcgaaacccgacaggactataaagataccaggcgtttccccctggaagctccctcgtgcgctctcctgt…			Fig. 3, S3
4657		plasmid	pHygR2 tetOB 4X mNG	tetOB 4X spaced 25bp apart driving mNG in an RMCE integration vector	this study	7726	atcccgctttccagtcgggaaacctgtcgtgccagctgcattaatgaatcggccaacgcgcggggagaggcggtttgcgtattgggcgaattccgcttcctcgctcactgactcgctgcgctcggtcgttcggctgcggcgagcggtatcagctcactcaaaggcggtaatacggttatccacagaatcaggggataacgcaggaaagaacatgtgagcaaaaggccagcaaaaggccaggaaccgtaaaaaggccgcgttgctggcgtttttccataggctccgcccccctgacgagcatcacaaaaatcgacgctcaagtcagaggtggcgaaacccgacaggactataaagataccaggcgtttccccctggaagctccctcgtgcgctctcctgt…			Fig. 3, S3
4658		plasmid	pHygR2 tetOC 4X mNG	tetOC 4X spaced 50bp apart driving mNG in an RMCE integration vector	this study	7726	atcccgctttccagtcgggaaacctgtcgtgccagctgcattaatgaatcggccaacgcgcggggagaggcggtttgcgtattgggcgaattccgcttcctcgctcactgactcgctgcgctcggtcgttcggctgcggcgagcggtatcagctcactcaaaggcggtaatacggttatccacagaatcaggggataacgcaggaaagaacatgtgagcaaaaggccagcaaaaggccaggaaccgtaaaaaggccgcgttgctggcgtttttccataggctccgcccccctgacgagcatcacaaaaatcgacgctcaagtcagaggtggcgaaacccgacaggactataaagataccaggcgtttccccctggaagctccctcgtgcgctctcctgt…			Fig. 3, S3
4661		plasmid	DR274 AAC TGG lexO 6X	lexO 6X in a GG SapI ACC TGG assembly vector	this study	2034	TGGGCCTTTCTTCGGTAGAAAATCAAAGGATCTTCttgagatcctttttttctgcgcgtaatctgctgcttgcaaacaaaaaaaccaccgctaccagcggtggtttgtttgccggatcaagagctaccaactctttttccgaggtaactggcttcagcagagcgcagataccaaatactgttcttctagtgtagccgtagttaggccaccacttcaagaactctgtagcaccgcctacatacctcgctctgctaatcctgttaccagtggctgctgccagtggcgataagtcgtgtcttaccgggttggactcaagacgatagttaccggataaggcgcagcggtcgggctgaacggggggttcgtgcacacagcccagcttggagcgaacgacctaca…			Fig. 2, S2
4669		plasmid	pHygGP16 lexO 18X mNG	lexO 18X close enhancer driving pes-10 basal promoter and mNG in an RMHE compatible RMCE vector	this study	8402	atcccgctttccagtcgggaaacctgtcgtgccagctgcattaatgaatcggccaacgcgcggggagaggcggtttgcgtattgggcgaattccgcttcctcgctcactgactcgctgcgctcggtcgttcggctgcggcgagcggtatcagctcactcaaaggcggtaatacggttatccacagaatcaggggataacgcaggaaagaacatgtgagcaaaaggccagcaaaaggccaggaaccgtaaaaaggccgcgttgctggcgtttttccataggctccgcccccctgacgagcatcacaaaaatcgacgctcaagtcagaggtggcgaaacccgacaggactataaagataccaggcgtttccccctggaagctccctcgtgcgctctcctgt…			Fig. 2, S2
4674		plasmid	pHygGP6 lexO 6X mNG	lexO 6X close enhancer driving pes-10 basal promoter and mNG in an RMHE compatible RMCE vector	this study	8104	atcccgctttccagtcgggaaacctgtcgtgccagctgcattaatgaatcggccaacgcgcggggagaggcggtttgcgtattgggcgaattccgcttcctcgctcactgactcgctgcgctcggtcgttcggctgcggcgagcggtatcagctcactcaaaggcggtaatacggttatccacagaatcaggggataacgcaggaaagaacatgtgagcaaaaggccagcaaaaggccaggaaccgtaaaaaggccgcgttgctggcgtttttccataggctccgcccccctgacgagcatcacaaaaatcgacgctcaagtcagaggtggcgaaacccgacaggactataaagataccaggcgtttccccctggaagctccctcgtgcgctctcctgt…			Fig. 2, S2
4713		plasmid	DR274 CAA TGG 18sp	1.8kb spacer in a GG SapI CAA TGG assembly vector	this study	3788	TGGGCCTTTCTTCGGTAGAAAATCAAAGGATCTTCttgagatcctttttttctgcgcgtaatctgctgcttgcaaacaaaaaaaccaccgctaccagcggtggtttgtttgccggatcaagagctaccaactctttttccgaggtaactggcttcagcagagcgcagataccaaatactgttcttctagtgtagccgtagttaggccaccacttcaagaactctgtagcaccgcctacatacctcgctctgctaatcctgttaccagtggctgctgccagtggcgataagtcgtgtcttaccgggttggactcaagacgatagttaccggataaggcgcagcggtcgggctgaacggggggttcgtgcacacagcccagcttggagcgaacgacctaca…			used to make [4732] & [4733]
4714		plasmid	DR274 5' arm 13sp	1.3kb spacer in a GG SapI TGG GCG assembly vector	this study	3210	TGGGCCTTTCTTCGGTAGAAAATCAAAGGATCTTCttgagatcctttttttctgcgcgtaatctgctgcttgcaaacaaaaaaaccaccgctaccagcggtggtttgtttgccggatcaagagctaccaactctttttccgaggtaactggcttcagcagagcgcagataccaaatactgttcttctagtgtagccgtagttaggccaccacttcaagaactctgtagcaccgcctacatacctcgctctgctaatcctgttaccagtggctgctgccagtggcgataagtcgtgtcttaccgggttggactcaagacgatagttaccggataaggcgcagcggtcgggctgaacggggggttcgtgcacacagcccagcttggagcgaacgacctaca…			used to make [4731] & [4732]
4717		plasmid	pHygGP6 lexO 12X mNG	lexO 12X close enhancer driving pes-10 basal promoter and mNG in an RMHE compatible RMCE vector	this study	8254	atcccgctttccagtcgggaaacctgtcgtgccagctgcattaatgaatcggccaacgcgcggggagaggcggtttgcgtattgggcgaattccgcttcctcgctcactgactcgctgcgctcggtcgttcggctgcggcgagcggtatcagctcactcaaaggcggtaatacggttatccacagaatcaggggataacgcaggaaagaacatgtgagcaaaaggccagcaaaaggccaggaaccgtaaaaaggccgcgttgctggcgtttttccataggctccgcccccctgacgagcatcacaaaaatcgacgctcaagtcagaggtggcgaaacccgacaggactataaagataccaggcgtttccccctggaagctccctcgtgcgctctcctgt…			Fig. 2, S2
4721		plasmid	pHygG12 tetO 7X 04sp ∆mec-7 GFP tbb-2 3'	tetO 7X with a random 400bp sequence spacer driving GFP-C1 in an rRMCE integration vector	this study	8031	gtcgtgccagctgcattaatgaatcggccaacgcgcggggagaggcggtttgcgtattgggcgaattccgcttcctcgctcactgactcgctgcgctcggtcgttcggctgcggcgagcggtatcagctcactcaaaggcggtaatacggttatccacagaatcaggggataacgcaggaaagaacatgtgagcaaaaggccagcaaaaggccaggaaccgtaaaaaggccgcgttgctggcgtttttccataggctccgcccccctgacgagcatcacaaaaatcgacgctcaagtcagaggtggcgaaacccgacaggactataaagataccaggcgtttccccctggaagctccctcgtgcgctctcctgttccgaccctgccgcttaccggatac…			used to make [4765]
4731		plasmid	pHygG12 tetO 7X 13sp ∆mec-7 GFP tbb-2 3'	tetO 7X with a 1.3kb PATC-rich spacer between the basal promoter and tetO elements driving GFP in an rRMCE integration vector	this study	8952	gtcgtgccagctgcattaatgaatcggccaacgcgcggggagaggcggtttgcgtattgggcgaattccgcttcctcgctcactgactcgctgcgctcggtcgttcggctgcggcgagcggtatcagctcactcaaaggcggtaatacggttatccacagaatcaggggataacgcaggaaagaacatgtgagcaaaaggccagcaaaaggccaggaaccgtaaaaaggccgcgttgctggcgtttttccataggctccgcccccctgacgagcatcacaaaaatcgacgctcaagtcagaggtggcgaaacccgacaggactataaagataccaggcgtttccccctggaagctccctcgtgcgctctcctgttccgaccctgccgcttaccggatac…			Fig. 3
4732		plasmid	pHygG12 tetO 7X 18sp 13sp ∆mec-7 GFP tbb-2 3'	tetO 7X with 1.3kb and 1.8kb spacers between the basal promoter and tetO elements driving GFP in an rRMCe integration vector	this study	10854	gtcgtgccagctgcattaatgaatcggccaacgcgcggggagaggcggtttgcgtattgggcgaattccgcttcctcgctcactgactcgctgcgctcggtcgttcggctgcggcgagcggtatcagctcactcaaaggcggtaatacggttatccacagaatcaggggataacgcaggaaagaacatgtgagcaaaaggccagcaaaaggccaggaaccgtaaaaaggccgcgttgctggcgtttttccataggctccgcccccctgacgagcatcacaaaaatcgacgctcaagtcagaggtggcgaaacccgacaggactataaagataccaggcgtttccccctggaagctccctcgtgcgctctcctgttccgaccctgccgcttaccggatac…			Fig. 3
4733		plasmid	pHygG12 tetO 7X 18sp 04sp ∆mec-7 GFP tbb-2 3'	tetO 7X with 0.4kb and 1.8kb spacers between the basal promoter and tetO elements driving GFP in an rRMCE integration vector	this study	9933	gtcgtgccagctgcattaatgaatcggccaacgcgcggggagaggcggtttgcgtattgggcgaattccgcttcctcgctcactgactcgctgcgctcggtcgttcggctgcggcgagcggtatcagctcactcaaaggcggtaatacggttatccacagaatcaggggataacgcaggaaagaacatgtgagcaaaaggccagcaaaaggccaggaaccgtaaaaaggccgcgttgctggcgtttttccataggctccgcccccctgacgagcatcacaaaaatcgacgctcaagtcagaggtggcgaaacccgacaggactataaagataccaggcgtttccccctggaagctccctcgtgcgctctcctgttccgaccctgccgcttaccggatac…			Fig. 3
4734		synthetic DNA	tetO 13X	13X tetO with 43 bp between 17 bp operators with sequence as backdrop being the two 400 bp randoms sequences from NMp4367 and NMp4368	this study	822	GGTCTCAgTGGcttcgccaaatgaagccgcatacagaacattttagttttaaaaGGGTAATCGCTTATCCGttcaggaagtctaggtttgctgctacaatcaatcatttcatctGGATAAACGATTATCCTatttttggcatagtgcatgtcgcatgatttttctttacccattGGGTAATCGCTTATCCTttatttgttgacagaaagtatgccgtttgttttttgagcacagGGATAAACAATTATCCTcagagatttacagatagtggtggtaccgtaggtaaaaccgctgGGGTAATCGCTTATCCTtttgatctgggatcccaaacttcagaaatttttcagtggaaccGGATAAACAATTATCCTacttgaaactccgcctttcctcgtgcaa…			used to make [4740]
4735		synthetic DNA	lexO 13X	13X lexO with 43 bp between 17 bp operators with sequence as backdrop being the two 400 bp randoms sequences from NMp4367 and NMp4368	this study	822	GGTCTCAgTGGcttcgccaaatgaagccgcatacagaacattttagttttaaaactgtacatccatacagTttcaggaagtctaggtttgctgctacaatcaatcatttcatctctgtacatccatacagTttttttggcatagtgcatgtcgcatgatttttctttacccattctgtacatccatacagAttatttgttgacagaaagtatgccgtttgttttttgagcacagctgtacatccatacagTcagagatttacagatagtggtggtaccgtaggtaaaaccgctgctgtacatccatacagAtttgatctgggatcccaaacttcagaaatttttcagtggaaccctgtacatccatacagTacttgaaactccgcctttcctcgtgcaa…
4736		synthetic DNA	QUAS 13X	13X QUAS with 43 bp between 17 bp operators with sequence as backdrop being the two 400 bp randoms sequences from NMp4367 and NMp4368	this study	822	GGTCTCAgTGGcttcgccaaatgaagccgcatacagaacattttagttttaaaaccctatcagtgatagagttcaggaagtctaggtttgctgctacaatcaatcatttcatctctctatcagtgatagagttttttggcatagtgcatgtcgcatgatttttctttacccattccctatcagtgatagagttatttgttgacagaaagtatgccgtttgttttttgagcacagccctatcaatgatagagcagagatttacagatagtggtggtaccgtaggtaaaaccgctgccctatcagtgatagagtttgatctgggatcccaaacttcagaaatttttcagtggaaccccctatcagtgatagagacttgaaactccgcctttcctcgtgcaa…
4740		plasmid	DR274 5' arm tetO 13X	13X tetO spaced with 43bp between each site in a GG SapI TGG GCG assembly vector	this study	2689	TGGGCCTTTCTTCGGTAGAAAATCAAAGGATCTTCttgagatcctttttttctgcgcgtaatctgctgcttgcaaacaaaaaaaccaccgctaccagcggtggtttgtttgccggatcaagagctaccaactctttttccgaggtaactggcttcagcagagcgcagataccaaatactgttcttctagtgtagccgtagttaggccaccacttcaagaactctgtagcaccgcctacatacctcgctctgctaatcctgttaccagtggctgctgccagtggcgataagtcgtgtcttaccgggttggactcaagacgatagttaccggataaggcgcagcggtcgggctgaacggggggttcgtgcacacagcccagcttggagcgaacgacctaca…			used to make [4881]
4741		plasmid	DR274 5' arm lexO 13X	13X lexO spaced with 43bp between each site in a GG SapI TGG GCG assembly vector	this study	2689	TGGGCCTTTCTTCGGTAGAAAATCAAAGGATCTTCttgagatcctttttttctgcgcgtaatctgctgcttgcaaacaaaaaaaccaccgctaccagcggtggtttgtttgccggatcaagagctaccaactctttttccgaggtaactggcttcagcagagcgcagataccaaatactgttcttctagtgtagccgtagttaggccaccacttcaagaactctgtagcaccgcctacatacctcgctctgctaatcctgttaccagtggctgctgccagtggcgataagtcgtgtcttaccgggttggactcaagacgatagttaccggataaggcgcagcggtcgggctgaacggggggttcgtgcacacagcccagcttggagcgaacgacctaca…
4742		plasmid	DR274 5' arm QUAS 13X	13X QUAS spaced with 43bp between each site in a GG SapI TGG GCG assembly vector	this study	2689	TGGGCCTTTCTTCGGTAGAAAATCAAAGGATCTTCttgagatcctttttttctgcgcgtaatctgctgcttgcaaacaaaaaaaccaccgctaccagcggtggtttgtttgccggatcaagagctaccaactctttttccgaggtaactggcttcagcagagcgcagataccaaatactgttcttctagtgtagccgtagttaggccaccacttcaagaactctgtagcaccgcctacatacctcgctctgctaatcctgttaccagtggctgctgccagtggcgataagtcgtgtcttaccgggttggactcaagacgatagttaccggataaggcgcagcggtcgggctgaacggggggttcgtgcacacagcccagcttggagcgaacgacctaca…
4754		plasmid	pHygGB6 13X lexO mec-7bp mNG	13X lexO mec-7bp promoter driving mNG in an RMHE compatible rRMCE vector	this study	8752	atcccgctttccagtcgggaaacctgtcgtgccagctgcattaatgaatcggccaacgcgcggggagaggcggtttgcgtattgggcgaattccgcttcctcgctcactgactcgctgcgctcggtcgttcggctgcggcgagcggtatcagctcactcaaaggcggtaatacggttatccacagaatcaggggataacgcaggaaagaacatgtgagcaaaaggccagcaaaaggccaggaaccgtaaaaaggccgcgttgctggcgtttttccataggctccgcccccctgacgagcatcacaaaaatcgacgctcaagtcagaggtggcgaaacccgacaggactataaagataccaggcgtttccccctggaagctccctcgtgcgctctcctgt…
4755		plasmid	pHygGB6 QUAS 13X mec-7bp mNG	13X QUAS mec-7bp promoter driving mNG in an RMHE compatible rRMCE vector	this study	8752	atcccgctttccagtcgggaaacctgtcgtgccagctgcattaatgaatcggccaacgcgcggggagaggcggtttgcgtattgggcgaattccgcttcctcgctcactgactcgctgcgctcggtcgttcggctgcggcgagcggtatcagctcactcaaaggcggtaatacggttatccacagaatcaggggataacgcaggaaagaacatgtgagcaaaaggccagcaaaaggccaggaaccgtaaaaaggccgcgttgctggcgtttttccataggctccgcccccctgacgagcatcacaaaaatcgacgctcaagtcagaggtggcgaaacccgacaggactataaagataccaggcgtttccccctggaagctccctcgtgcgctctcctgt…
4756		plasmid	pHygR2 TGG GTA ∆mec-7 nls-GFP - SapI	mec-7 basal promoter driving GFP in a pHygR2 integration vector with a SapI TTG GTA site to insert 3' UTRs	this study	7519	atcccgctttccagtcgggaaacctgtcgtgccagctgcattaatgaatcggccaacgcgcggggagaggcggtttgcgtattgggcgaattccgcttcctcgctcactgactcgctgcgctcggtcgttcggctgcggcgagcggtatcagctcactcaaaggcggtaatacggttatccacagaatcaggggataacgcaggaaagaacatgtgagcaaaaggccagcaaaaggccaggaaccgtaaaaaggccgcgttgctggcgtttttccataggctccgcccccctgacgagcatcacaaaaatcgacgctcaagtcagaggtggcgaaacccgacaggactataaagataccaggcgtttccccctggaagctccctcgtgcgctctcctgt…			used to make [4775], [4809], [4810], [4811], [4812], [4825], [4864], [4892], [4894], [4896], [4898], [4899], & [4900]
4765		plasmid	DR274 SEC-3' arm ter-222 3'	3' UTR containing 3 back-to-back 3' UTR regions of tbb-2 followed by rps-2 followed by rpl-2	this study	2704	TGGGCCTTTCTTCGGTAGAAAATCAAAGGATCTTCttgagatcctttttttctgcgcgtaatctgctgcttgcaaacaaaaaaaccaccgctaccagcggtggtttgtttgccggatcaagagctaccaactctttttccgaggtaactggcttcagcagagcgcagataccaaatactgttcttctagtgtagccgtagttaggccaccacttcaagaactctgtagcaccgcctacatacctcgctctgctaatcctgttaccagtggctgctgccagtggcgataagtcgtgtcttaccgggttggactcaagacgatagttaccggataaggcgcagcggtcgggctgaacggggggttcgtgcacacagcccagcttggagcgaacgacctaca…			used to make [4900] & [4955]
4766		plasmid	DR274 5' arm nls-scarlet tbb-2 rev	nls-scarlet and the tbb-2 3' UTR in reverse orientation in a GG SapI TGG GCG assembly vector	this study	3173	TGGGCCTTTCTTCGGTAGAAAATCAAAGGATCTTCttgagatcctttttttctgcgcgtaatctgctgcttgcaaacaaaaaaaccaccgctaccagcggtggtttgtttgccggatcaagagctaccaactctttttccgaggtaactggcttcagcagagcgcagataccaaatactgttcttctagtgtagccgtagttaggccaccacttcaagaactctgtagcaccgcctacatacctcgctctgctaatcctgttaccagtggctgctgccagtggcgataagtcgtgtcttaccgggttggactcaagacgatagttaccggataaggcgcagcggtcgggctgaacggggggttcgtgcacacagcccagcttggagcgaacgacctaca…			used to make [4782]
4775		plasmid	pHygR2 tbb-2 3' ∆mec-7 nls-GFP	tbb-2 3' UTR in front of the mec-7 basal promoter and nls-GFP in an RMCE integration vector	this study	7866	atcccgctttccagtcgggaaacctgtcgtgccagctgcattaatgaatcggccaacgcgcggggagaggcggtttgcgtattgggcgaattccgcttcctcgctcactgactcgctgcgctcggtcgttcggctgcggcgagcggtatcagctcactcaaaggcggtaatacggttatccacagaatcaggggataacgcaggaaagaacatgtgagcaaaaggccagcaaaaggccaggaaccgtaaaaaggccgcgttgctggcgtttttccataggctccgcccccctgacgagcatcacaaaaatcgacgctcaagtcagaggtggcgaaacccgacaggactataaagataccaggcgtttccccctggaagctccctcgtgcgctctcctgt…			for Fig. 7
4777		plasmid	DR274 TGG AAG promRand3	random 400bp sequence in a GG SApI TGG AAG assembly vector	this study	2289	TGGGCCTTTCTTCGGTAGAAAATCAAAGGATCTTCttgagatcctttttttctgcgcgtaatctgctgcttgcaaacaaaaaaaccaccgctaccagcggtggtttgtttgccggatcaagagctaccaactctttttccgaggtaactggcttcagcagagcgcagataccaaatactgttcttctagtgtagccgtagttaggccaccacttcaagaactctgtagcaccgcctacatacctcgctctgctaatcctgttaccagtggctgctgccagtggcgataagtcgtgtcttaccgggttggactcaagacgatagttaccggataaggcgcagcggtcgggctgaacggggggttcgtgcacacagcccagcttggagcgaacgacctaca…			used to make [4809], [4810], [4811], [4812], [4825], [4864], [4892], [4894], [4896], [4898], [4899], & [4900]
4782		plasmid	pHygGP6 nls-scarlet tetO 7X nls-GFP	tetO 7X promoter with nls-scarlet in reverse orientation upstream and nls-GFP downstream in an rRMCE integration vector	this study	9624	atcccgctttccagtcgggaaacctgtcgtgccagctgcattaatgaatcggccaacgcgcggggagaggcggtttgcgtattgggcgaattccgcttcctcgctcactgactcgctgcgctcggtcgttcggctgcggcgagcggtatcagctcactcaaaggcggtaatacggttatccacagaatcaggggataacgcaggaaagaacatgtgagcaaaaggccagcaaaaggccaggaaccgtaaaaaggccgcgttgctggcgtttttccataggctccgcccccctgacgagcatcacaaaaatcgacgctcaagtcagaggtggcgaaacccgacaggactataaagataccaggcgtttccccctggaagctccctcgtgcgctctcctgt…			Fig. 6
4797		plasmid	DR274 SEC-3' arm rps-0 3'	rps-0 3' UTR in a GG SapI AAG GTA assembly vector	this study	2126	TGGGCCTTTCTTCGGTAGAAAATCAAAGGATCTTCttgagatcctttttttctgcgcgtaatctgctgcttgcaaacaaaaaaaccaccgctaccagcggtggtttgtttgccggatcaagagctaccaactctttttccgaggtaactggcttcagcagagcgcagataccaaatactgttcttctagtgtagccgtagttaggccaccacttcaagaactctgtagcaccgcctacatacctcgctctgctaatcctgttaccagtggctgctgccagtggcgataagtcgtgtcttaccgggttggactcaagacgatagttaccggataaggcgcagcggtcgggctgaacggggggttcgtgcacacagcccagcttggagcgaacgacctaca…			used to make [4892] & [4938]
4804		plasmid	DR274 CT ∆act-4.2	act-4 basal promoter in a GG SapI GCG ATG assembly vector	this study	2015	TGGGCCTTTCTTCGGTAGAAAATCAAAGGATCTTCttgagatcctttttttctgcgcgtaatctgctgcttgcaaacaaaaaaaccaccgctaccagcggtggtttgtttgccggatcaagagctaccaactctttttccgaggtaactggcttcagcagagcgcagataccaaatactgttcttctagtgtagccgtagttaggccaccacttcaagaactctgtagcaccgcctacatacctcgctctgctaatcctgttaccagtggctgctgccagtggcgataagtcgtgtcttaccgggttggactcaagacgatagttaccggataaggcgcagcggtcgggctgaacggggggttcgtgcacacagcccagcttggagcgaacgacctaca…			used to make [4828]
4805		plasmid	DR274 CT ∆act-4.3	act-4 basal promoter in a GG SapI GCG ATG assembly vector	this study	2002	TGGGCCTTTCTTCGGTAGAAAATCAAAGGATCTTCttgagatcctttttttctgcgcgtaatctgctgcttgcaaacaaaaaaaccaccgctaccagcggtggtttgtttgccggatcaagagctaccaactctttttccgaggtaactggcttcagcagagcgcagataccaaatactgttcttctagtgtagccgtagttaggccaccacttcaagaactctgtagcaccgcctacatacctcgctctgctaatcctgttaccagtggctgctgccagtggcgataagtcgtgtcttaccgggttggactcaagacgatagttaccggataaggcgcagcggtcgggctgaacggggggttcgtgcacacagcccagcttggagcgaacgacctaca…			used to make [4829]
4806		plasmid	DR274 CT ∆act-4.4	act-4 basal promoter in a GG SapI GCG ATG assembly vector	this study	1989	TGGGCCTTTCTTCGGTAGAAAATCAAAGGATCTTCttgagatcctttttttctgcgcgtaatctgctgcttgcaaacaaaaaaaccaccgctaccagcggtggtttgtttgccggatcaagagctaccaactctttttccgaggtaactggcttcagcagagcgcagataccaaatactgttcttctagtgtagccgtagttaggccaccacttcaagaactctgtagcaccgcctacatacctcgctctgctaatcctgttaccagtggctgctgccagtggcgataagtcgtgtcttaccgggttggactcaagacgatagttaccggataaggcgcagcggtcgggctgaacggggggttcgtgcacacagcccagcttggagcgaacgacctaca…			used to make [4830]
4807		plasmid	DR274 CT ∆tbb-2.2	tbb-2 basal promoter in a GG SapI GCG ATG assembly vector	this study	2080	TGGGCCTTTCTTCGGTAGAAAATCAAAGGATCTTCttgagatcctttttttctgcgcgtaatctgctgcttgcaaacaaaaaaaccaccgctaccagcggtggtttgtttgccggatcaagagctaccaactctttttccgaggtaactggcttcagcagagcgcagataccaaatactgttcttctagtgtagccgtagttaggccaccacttcaagaactctgtagcaccgcctacatacctcgctctgctaatcctgttaccagtggctgctgccagtggcgataagtcgtgtcttaccgggttggactcaagacgatagttaccggataaggcgcagcggtcgggctgaacggggggttcgtgcacacagcccagcttggagcgaacgacctaca…			used to make [4831]
4808		plasmid	DR274 CT ∆lys-8.2	lys-8 basal promoter in a GG SapI GCG ATG assembly vector	this study	2051	TGGGCCTTTCTTCGGTAGAAAATCAAAGGATCTTCttgagatcctttttttctgcgcgtaatctgctgcttgcaaacaaaaaaaccaccgctaccagcggtggtttgtttgccggatcaagagctaccaactctttttccgaggtaactggcttcagcagagcgcagataccaaatactgttcttctagtgtagccgtagttaggccaccacttcaagaactctgtagcaccgcctacatacctcgctctgctaatcctgttaccagtggctgctgccagtggcgataagtcgtgtcttaccgggttggactcaagacgatagttaccggataaggcgcagcggtcgggctgaacggggggttcgtgcacacagcccagcttggagcgaacgacctaca…			used to make [4832]
4809		plasmid	pHygR2 R400 unc-54 3' ∆mec-7 nls-GFP	unc-54 3' UTR in front of the mec-7 basal promoter nls-GFP in an RMCE integration vector	this study	8301	atcccgctttccagtcgggaaacctgtcgtgccagctgcattaatgaatcggccaacgcgcggggagaggcggtttgcgtattgggcgaattccgcttcctcgctcactgactcgctgcgctcggtcgttcggctgcggcgagcggtatcagctcactcaaaggcggtaatacggttatccacagaatcaggggataacgcaggaaagaacatgtgagcaaaaggccagcaaaaggccaggaaccgtaaaaaggccgcgttgctggcgtttttccataggctccgcccccctgacgagcatcacaaaaatcgacgctcaagtcagaggtggcgaaacccgacaggactataaagataccaggcgtttccccctggaagctccctcgtgcgctctcctgt…			Fig. S7
4810		plasmid	pHygR2 R400 act-4 3' ∆mec-7 nls-GFP	act-4 3' UTR in front of the mec-7 basal promoter nls-GFP in an RMCE integration vector	this study	8486	atcccgctttccagtcgggaaacctgtcgtgccagctgcattaatgaatcggccaacgcgcggggagaggcggtttgcgtattgggcgaattccgcttcctcgctcactgactcgctgcgctcggtcgttcggctgcggcgagcggtatcagctcactcaaaggcggtaatacggttatccacagaatcaggggataacgcaggaaagaacatgtgagcaaaaggccagcaaaaggccaggaaccgtaaaaaggccgcgttgctggcgtttttccataggctccgcccccctgacgagcatcacaaaaatcgacgctcaagtcagaggtggcgaaacccgacaggactataaagataccaggcgtttccccctggaagctccctcgtgcgctctcctgt…			Fig. S7
4811		plasmid	pHygR2 R400 rps-2 3' ∆mec-7 nls-GFP	rps-2 3' UTR in front of the mec-7 basal promoter nls-GFP in an RMCE integration vector	this study	8213	atcccgctttccagtcgggaaacctgtcgtgccagctgcattaatgaatcggccaacgcgcggggagaggcggtttgcgtattgggcgaattccgcttcctcgctcactgactcgctgcgctcggtcgttcggctgcggcgagcggtatcagctcactcaaaggcggtaatacggttatccacagaatcaggggataacgcaggaaagaacatgtgagcaaaaggccagcaaaaggccaggaaccgtaaaaaggccgcgttgctggcgtttttccataggctccgcccccctgacgagcatcacaaaaatcgacgctcaagtcagaggtggcgaaacccgacaggactataaagataccaggcgtttccccctggaagctccctcgtgcgctctcctgt…			Fig. S7
4812		plasmid	pHygR2 R400 let-858 3' ∆mec-7 nls-GFP	let-858 3' UTR in front of the mec-7 basal promoter nls-GFP in an RMCE integration vector	this study	8307	atcccgctttccagtcgggaaacctgtcgtgccagctgcattaatgaatcggccaacgcgcggggagaggcggtttgcgtattgggcgaattccgcttcctcgctcactgactcgctgcgctcggtcgttcggctgcggcgagcggtatcagctcactcaaaggcggtaatacggttatccacagaatcaggggataacgcaggaaagaacatgtgagcaaaaggccagcaaaaggccaggaaccgtaaaaaggccgcgttgctggcgtttttccataggctccgcccccctgacgagcatcacaaaaatcgacgctcaagtcagaggtggcgaaacccgacaggactataaagataccaggcgtttccccctggaagctccctcgtgcgctctcctgt…			Fig. 7
4825		plasmid	pHygR2 R400 tbb-2 3' ∆mec-7 nls-GFP	tbb-2 3' UTR in front of the mec-7 basal promoter nls-GFP in an RMCE integration vector	this study	8229	atcccgctttccagtcgggaaacctgtcgtgccagctgcattaatgaatcggccaacgcgcggggagaggcggtttgcgtattgggcgaattccgcttcctcgctcactgactcgctgcgctcggtcgttcggctgcggcgagcggtatcagctcactcaaaggcggtaatacggttatccacagaatcaggggataacgcaggaaagaacatgtgagcaaaaggccagcaaaaggccaggaaccgtaaaaaggccgcgttgctggcgtttttccataggctccgcccccctgacgagcatcacaaaaatcgacgctcaagtcagaggtggcgaaacccgacaggactataaagataccaggcgtttccccctggaagctccctcgtgcgctctcctgt…			Fig. S7
4828		plasmid	pHygR2 tetO 7X ∆act-4.2 GFP tbb-2 3'	act-4 basal promoter construct driving GFP in an rRMCE integration vector	this study	7537	atcccgctttccagtcgggaaacctgtcgtgccagctgcattaatgaatcggccaacgcgcggggagaggcggtttgcgtattgggcgaattccgcttcctcgctcactgactcgctgcgctcggtcgttcggctgcggcgagcggtatcagctcactcaaaggcggtaatacggttatccacagaatcaggggataacgcaggaaagaacatgtgagcaaaaggccagcaaaaggccaggaaccgtaaaaaggccgcgttgctggcgtttttccataggctccgcccccctgacgagcatcacaaaaatcgacgctcaagtcagaggtggcgaaacccgacaggactataaagataccaggcgtttccccctggaagctccctcgtgcgctctcctgt…			Fig. 5, S5
4829		plasmid	pHygR2 tetO 7X ∆act-4.3 GFP tbb-2 3'	act-4 basal promoter construct driving GFP in an rRMCE integration vector	this study	7524	atcccgctttccagtcgggaaacctgtcgtgccagctgcattaatgaatcggccaacgcgcggggagaggcggtttgcgtattgggcgaattccgcttcctcgctcactgactcgctgcgctcggtcgttcggctgcggcgagcggtatcagctcactcaaaggcggtaatacggttatccacagaatcaggggataacgcaggaaagaacatgtgagcaaaaggccagcaaaaggccaggaaccgtaaaaaggccgcgttgctggcgtttttccataggctccgcccccctgacgagcatcacaaaaatcgacgctcaagtcagaggtggcgaaacccgacaggactataaagataccaggcgtttccccctggaagctccctcgtgcgctctcctgt…			Fig. 5, S5
4830		plasmid	pHygR2 tetO 7X ∆act-4.4 GFP tbb-2 3'	act-4 basal promoter construct driving GFP in an rRMCE integration vector	this study	7511	atcccgctttccagtcgggaaacctgtcgtgccagctgcattaatgaatcggccaacgcgcggggagaggcggtttgcgtattgggcgaattccgcttcctcgctcactgactcgctgcgctcggtcgttcggctgcggcgagcggtatcagctcactcaaaggcggtaatacggttatccacagaatcaggggataacgcaggaaagaacatgtgagcaaaaggccagcaaaaggccaggaaccgtaaaaaggccgcgttgctggcgtttttccataggctccgcccccctgacgagcatcacaaaaatcgacgctcaagtcagaggtggcgaaacccgacaggactataaagataccaggcgtttccccctggaagctccctcgtgcgctctcctgt…			Fig. 5, S5
4831		plasmid	pHygR2 tetO 7X ∆tbb-2.2 GFP tbb-2 3'	tbb-2 basal promoter construct driving GFP in an rRMCE integration vector	this study	7602	atcccgctttccagtcgggaaacctgtcgtgccagctgcattaatgaatcggccaacgcgcggggagaggcggtttgcgtattgggcgaattccgcttcctcgctcactgactcgctgcgctcggtcgttcggctgcggcgagcggtatcagctcactcaaaggcggtaatacggttatccacagaatcaggggataacgcaggaaagaacatgtgagcaaaaggccagcaaaaggccaggaaccgtaaaaaggccgcgttgctggcgtttttccataggctccgcccccctgacgagcatcacaaaaatcgacgctcaagtcagaggtggcgaaacccgacaggactataaagataccaggcgtttccccctggaagctccctcgtgcgctctcctgt…			Fig. 5, S5
4832		plasmid	pHygR2 tetO 7X ∆lys-8.2 GFP tbb-2 3'	lys-8 basal promoter construct driving GFP in an rRMCE integration vector	this study	7573	atcccgctttccagtcgggaaacctgtcgtgccagctgcattaatgaatcggccaacgcgcggggagaggcggtttgcgtattgggcgaattccgcttcctcgctcactgactcgctgcgctcggtcgttcggctgcggcgagcggtatcagctcactcaaaggcggtaatacggttatccacagaatcaggggataacgcaggaaagaacatgtgagcaaaaggccagcaaaaggccaggaaccgtaaaaaggccgcgttgctggcgtttttccataggctccgcccccctgacgagcatcacaaaaatcgacgctcaagtcagaggtggcgaaacccgacaggactataaagataccaggcgtttccccctggaagctccctcgtgcgctctcctgt…			Fig. 5, S5
4833		plasmid	pHygR2 tetO 7X ∆act-4 GFP let-858 3'	act-4 basal promoter construct driving GFP in an rRMCE integration vector	this study	7637	atcccgctttccagtcgggaaacctgtcgtgccagctgcattaatgaatcggccaacgcgcggggagaggcggtttgcgtattgggcgaattccgcttcctcgctcactgactcgctgcgctcggtcgttcggctgcggcgagcggtatcagctcactcaaaggcggtaatacggttatccacagaatcaggggataacgcaggaaagaacatgtgagcaaaaggccagcaaaaggccaggaaccgtaaaaaggccgcgttgctggcgtttttccataggctccgcccccctgacgagcatcacaaaaatcgacgctcaagtcagaggtggcgaaacccgacaggactataaagataccaggcgtttccccctggaagctccctcgtgcgctctcctgt…			Fig. 5, S5
4837		plasmid	pHygG6 TGG GTA sl2 mNG glh-2 3'	rRMCE integration vector for assaying 3'UTR activity and termnation	this study	7590	atcccgctttccagtcgggaaacctgtcgtgccagctgcattaatgaatcggccaacgcgcggggagaggcggtttgcgtattgggcgaattccgcttcctcgctcactgactcgctgcgctcggtcgttcggctgcggcgagcggtatcagctcactcaaaggcggtaatacggttatccacagaatcaggggataacgcaggaaagaacatgtgagcaaaaggccagcaaaaggccaggaaccgtaaaaaggccgcgttgctggcgtttttccataggctccgcccccctgacgagcatcacaaaaatcgacgctcaagtcagaggtggcgaaacccgacaggactataaagataccaggcgtttccccctggaagctccctcgtgcgctctcctgt…			used to make [4839], [4840], [4842], [4843], [4938], [4939], [4952], [4953], [4954], [4955], & [4956]
4838		plasmid	pHygG6 TGG GTA sl2 scarlet tbb-2 3'	rRMCE integration vector for assaying 3'UTR activity and termnation	this study	7444	atcccgctttccagtcgggaaacctgtcgtgccagctgcattaatgaatcggccaacgcgcggggagaggcggtttgcgtattgggcgaattccgcttcctcgctcactgactcgctgcgctcggtcgttcggctgcggcgagcggtatcagctcactcaaaggcggtaatacggttatccacagaatcaggggataacgcaggaaagaacatgtgagcaaaaggccagcaaaaggccaggaaccgtaaaaaggccgcgttgctggcgtttttccataggctccgcccccctgacgagcatcacaaaaatcgacgctcaagtcagaggtggcgaaacccgacaggactataaagataccaggcgtttccccctggaagctccctcgtgcgctctcctgt…			used to make [4935]
4839		plasmid	pHygG6 tetO 7X ∆mec-7 scarlet unc-54 3' sl2 mNG glh-2 3'	tetO 7X mec-7 basal promoter driving scarlet with an unc-54 3' UTR and a downstream sl2 and mNG	this study	9243	atcccgctttccagtcgggaaacctgtcgtgccagctgcattaatgaatcggccaacgcgcggggagaggcggtttgcgtattgggcgaattccgcttcctcgctcactgactcgctgcgctcggtcgttcggctgcggcgagcggtatcagctcactcaaaggcggtaatacggttatccacagaatcaggggataacgcaggaaagaacatgtgagcaaaaggccagcaaaaggccaggaaccgtaaaaaggccgcgttgctggcgtttttccataggctccgcccccctgacgagcatcacaaaaatcgacgctcaagtcagaggtggcgaaacccgacaggactataaagataccaggcgtttccccctggaagctccctcgtgcgctctcctgt…			Fig. 7
4840		plasmid	pHygG6 tetO 7X ∆mec-7 scarlet let-858 3' sl2 mNG glh-2 3'	tetO 7X mec-7 basal promoter driving scarlet with a let-858 3' UTR and a downstream sl2 and mNG	this study	9249	atcccgctttccagtcgggaaacctgtcgtgccagctgcattaatgaatcggccaacgcgcggggagaggcggtttgcgtattgggcgaattccgcttcctcgctcactgactcgctgcgctcggtcgttcggctgcggcgagcggtatcagctcactcaaaggcggtaatacggttatccacagaatcaggggataacgcaggaaagaacatgtgagcaaaaggccagcaaaaggccaggaaccgtaaaaaggccgcgttgctggcgtttttccataggctccgcccccctgacgagcatcacaaaaatcgacgctcaagtcagaggtggcgaaacccgacaggactataaagataccaggcgtttccccctggaagctccctcgtgcgctctcctgt…			Fig. 7
4841		plasmid	pHygG6 tetO 7X ∆mec-7 scarlet tbb-2 3' sl2 mNG glh-2 3'	tetO 7X mec-7 basal promoter driving scarlet with a tbb-2 3' UTR and a downstream sl2 and mNG	this study	9171	atcccgctttccagtcgggaaacctgtcgtgccagctgcattaatgaatcggccaacgcgcggggagaggcggtttgcgtattgggcgaattccgcttcctcgctcactgactcgctgcgctcggtcgttcggctgcggcgagcggtatcagctcactcaaaggcggtaatacggttatccacagaatcaggggataacgcaggaaagaacatgtgagcaaaaggccagcaaaaggccaggaaccgtaaaaaggccgcgttgctggcgtttttccataggctccgcccccctgacgagcatcacaaaaatcgacgctcaagtcagaggtggcgaaacccgacaggactataaagataccaggcgtttccccctggaagctccctcgtgcgctctcctgt…			Fig. 7
4842		plasmid	pHygG6 tetO 7X ∆pes-10 scarlet unc-54 3' sl2 mNG glh-2 3'	tetO 7X pes-10 basal promoter driving scarlet with an unc-54 3' UTR and a downstream sl2 and mNG	this study	9283	atcccgctttccagtcgggaaacctgtcgtgccagctgcattaatgaatcggccaacgcgcggggagaggcggtttgcgtattgggcgaattccgcttcctcgctcactgactcgctgcgctcggtcgttcggctgcggcgagcggtatcagctcactcaaaggcggtaatacggttatccacagaatcaggggataacgcaggaaagaacatgtgagcaaaaggccagcaaaaggccaggaaccgtaaaaaggccgcgttgctggcgtttttccataggctccgcccccctgacgagcatcacaaaaatcgacgctcaagtcagaggtggcgaaacccgacaggactataaagataccaggcgtttccccctggaagctccctcgtgcgctctcctgt…			Fig. 7
4843		plasmid	pHygG6 tetO 7X ∆pes-10 scarlet let-858 3' sl2 mNG glh-2 3'	tetO 7X pes-10 basal promoter driving scarlet with a let-858 3' UTR and a downstream sl2 and mNG	this study	9289	atcccgctttccagtcgggaaacctgtcgtgccagctgcattaatgaatcggccaacgcgcggggagaggcggtttgcgtattgggcgaattccgcttcctcgctcactgactcgctgcgctcggtcgttcggctgcggcgagcggtatcagctcactcaaaggcggtaatacggttatccacagaatcaggggataacgcaggaaagaacatgtgagcaaaaggccagcaaaaggccaggaaccgtaaaaaggccgcgttgctggcgtttttccataggctccgcccccctgacgagcatcacaaaaatcgacgctcaagtcagaggtggcgaaacccgacaggactataaagataccaggcgtttccccctggaagctccctcgtgcgctctcctgt…			Fig. 7
4856		synthetic DNA	tetO 13X-33	tetO 13X sites spaced with 33bp in-between using same backdrop sequence as NMp4734	this study	822	GGTCTCAgTGGcttcgccaaatgaagccgcatacagaacattttagttttaaaattcgatttttctggcaattcaggaagtctaggtttgctgctacaatcaatcatttcatctgaattattttatttaaattttttggcatagtgcatgtcgcatgatttttctttacccattccctatcagtgatagagttatttgttgacagaaagtatgccgtttgttttctctatcagtgatagagaaaaatgatgcagagatttacagatagtggtggccctatcagtgatagagttgtatatttttcactcatttttgatctgggatccctatcaatgatagagtttcagtggaaccgtaaaaaaacaggaacaactccctatcagtgatagagtcgtgcaa…			used to make [4867]
4857		synthetic DNA	tetO 13X-37	tetO 13X sites spaced with 37bp in-between using same backdrop sequence as NMp4734	this study	822	GGTCTCAgTGGcttcgccaaatgaagccgcatacagaacattttagttttaaaattcgatttttctggcaattcaggaagtctaggtttgctgctacaatcaatcatttcatctgaattattttaaccctatcagtgatagagatgcatgtcgcatgatttttctttacccatttgttgcctctatcagtgatagaggttgacagaaagtatgccgtttgttttttgagcacagccctatcagtgatagagcagagatttacagatagtggtggtaccgtaggtaaaaccctatcaatgatagagctcatttttgatctgggatcccaaacttcagaaatatccctatcagtgatagagataacaggaacaacttgaaactccgcctttcctcgtgccc…			used to make [4868]
4858		synthetic DNA	tetO 13X-40	tetO 13X sites spaced with 40bp in-between using same backdrop sequence as NMp4734	this study	822	GGTCTCAgTGGcttcgccaaatgaagccgcatacagaacattttagttttaaaattcgatttttctggcaattcaggaagtctaggtttgccctatcagtgatagagttcatctgaattattttatttaaattttttggcatagtgcctctatcagtgatagagtttacccatttgttgctctttcttgttttatttgttgacaccctatcagtgatagagtttttgagcacagatttttcaaaaatgatgcagagatttaccctatcaatgatagaggtaggtaaaaccgctgtatatttttcactcatttttgataccctatcagtgatagaggaaatttttcagtggaaccgtaaaaaaacaggaacaactaccctatcagtgatagagcgtgcaa…			used to make [4869]
4864		plasmid	pHygR2 R400 QFAD ∆mec-7 nls-GFP	QF activation domain in front of the mec-7 basal promoter	this study	8397	atcccgctttccagtcgggaaacctgtcgtgccagctgcattaatgaatcggccaacgcgcggggagaggcggtttgcgtattgggcgaattccgcttcctcgctcactgactcgctgcgctcggtcgttcggctgcggcgagcggtatcagctcactcaaaggcggtaatacggttatccacagaatcaggggataacgcaggaaagaacatgtgagcaaaaggccagcaaaaggccaggaaccgtaaaaaggccgcgttgctggcgtttttccataggctccgcccccctgacgagcatcacaaaaatcgacgctcaagtcagaggtggcgaaacccgacaggactataaagataccaggcgtttccccctggaagctccctcgtgcgctctcctgt…			Fig. S7
4867		plasmid	DR274 5' arm tetO 13-33	tetO 13X spaced at 33bp apart in a GG SapI TGG GCG assembly vector	this study	2689	gTGGcttcgccaaatgaagccgcatacagaacattttagttttaaaattcgatttttctggcaattcaggaagtctaggtttgctgctacaatcaatcatttcatctgaattattttatttaaattttttggcatagtgcatgtcgcatgatttttctttacccattccctatcagtgatagagttatttgttgacagaaagtatgccgtttgttttctctatcagtgatagagaaaaatgatgcagagatttacagatagtggtggccctatcagtgatagagctgtatatttttcactcatttttgatctgggatccctatcaatgatagagtttcagtggaaccgtaaaaaaacaggaacaactccctatcagtgatagagtcgtgcaataaaatt…			used to make [4876]
4868		plasmid	DR274 5' arm tetO 13-37	tetO 13X spaced at 37bp apart in a GG SapI TGG GCG assembly vector	this study	2689	gTGGcttcgccaaatgaagccgcatacagaacattttagttttaaaattcgatttttctggcaattcaggaagtctaggtttgctgctacaatcaatcatttcatctgaattattttatccctatcagtgatagaggtgcatgtcgcatgatttttctttacccatttgttgcctctatcagtgatagaggttgacagaaagtatgccgtttgttttttgagcacagccctatcagtgatagagcagagatttacagatagtggtggtaccgtaggtaaaaccctatcaatgatagagctcatttttgatctgggatcccaaacttcagaaatttccctatcagtgatagagaaaacaggaacaacttgaaactccgcctttcctcgtgccctatcagt…			used to make [4877]
4869		plasmid	DR274 5' arm tetO 13-40	tetO 13X spaced at 40bp apart in a GG SapI TGG GCG assembly vector	this study	2689	gTGGcttcgccaaatgaagccgcatacagaacattttagttttaaaattcgatttttctggcaattcaggaagtctaggtttgccctatcagtgatagagttcatctgaattattttatttaaattttttggcatagtgcctctatcagtgatagagtttacccatttgttgctctttcttgttttatttgttgacaccctatcagtgatagagtttttgagcacagatttttcaaaaatgatgcagagatttaccctatcaatgatagaggtaggtaaaaccgctgtatatttttcactcatttttgatcccctatcagtgatagaggaaatttttcagtggaaccgtaaaaaaacaggaacaacttccctatcagtgatagagcgtgcaataaaatt…			used to make [4878]
4873		plasmid	DR274 SEC-3' arm ubl-1 3'	ubl-1 3' UTR in a GG SapI AAG GTA assembly vector	this study	2261	TGGGCCTTTCTTCGGTAGAAAATCAAAGGATCTTCttgagatcctttttttctgcgcgtaatctgctgcttgcaaacaaaaaaaccaccgctaccagcggtggtttgtttgccggatcaagagctaccaactctttttccgaggtaactggcttcagcagagcgcagataccaaatactgttcttctagtgtagccgtagttaggccaccacttcaagaactctgtagcaccgcctacatacctcgctctgctaatcctgttaccagtggctgctgccagtggcgataagtcgtgtcttaccgggttggactcaagacgatagttaccggataaggcgcagcggtcgggctgaacggggggttcgtgcacacagcccagcttggagcgaacgacctaca…			used to make [4896] & [4956]
4876		plasmid	pHygGP6 tetO 13X-33 mNG	tetO 13X with tetO sites spaced 33bp apart in an RMHE compatible rRMCE vector	this study	8722	atcccgctttccagtcgggaaacctgtcgtgccagctgcattaatgaatcggccaacgcgcggggagaggcggtttgcgtattgggcgaattccgcttcctcgctcactgactcgctgcgctcggtcgttcggctgcggcgagcggtatcagctcactcaaaggcggtaatacggttatccacagaatcaggggataacgcaggaaagaacatgtgagcaaaaggccagcaaaaggccaggaaccgtaaaaaggccgcgttgctggcgtttttccataggctccgcccccctgacgagcatcacaaaaatcgacgctcaagtcagaggtggcgaaacccgacaggactataaagataccaggcgtttccccctggaagctccctcgtgcgctctcctgt…			Fig. 3, S3
4877		plasmid	pHygGP6 tetO 13X-37 mNG	tetO 13X with tetO sites spaced 37bp apart in an RMHE compatible rRMCE vector	this study	8722	atcccgctttccagtcgggaaacctgtcgtgccagctgcattaatgaatcggccaacgcgcggggagaggcggtttgcgtattgggcgaattccgcttcctcgctcactgactcgctgcgctcggtcgttcggctgcggcgagcggtatcagctcactcaaaggcggtaatacggttatccacagaatcaggggataacgcaggaaagaacatgtgagcaaaaggccagcaaaaggccaggaaccgtaaaaaggccgcgttgctggcgtttttccataggctccgcccccctgacgagcatcacaaaaatcgacgctcaagtcagaggtggcgaaacccgacaggactataaagataccaggcgtttccccctggaagctccctcgtgcgctctcctgt…			Fig. 3, S3
4878		plasmid	pHygGP6 tetO 13X-40 mNG	tetO 13X with tetO sites spaced 40bp apart in an RMHE compatible rRMCE vector	this study	8722	atcccgctttccagtcgggaaacctgtcgtgccagctgcattaatgaatcggccaacgcgcggggagaggcggtttgcgtattgggcgaattccgcttcctcgctcactgactcgctgcgctcggtcgttcggctgcggcgagcggtatcagctcactcaaaggcggtaatacggttatccacagaatcaggggataacgcaggaaagaacatgtgagcaaaaggccagcaaaaggccaggaaccgtaaaaaggccgcgttgctggcgtttttccataggctccgcccccctgacgagcatcacaaaaatcgacgctcaagtcagaggtggcgaaacccgacaggactataaagataccaggcgtttccccctggaagctccctcgtgcgctctcctgt…			Fig. 3, S3
4879		plasmid	DR274 SEC-3' arm rps-9 3'	rps-9 3' UTR in a GG SapI AAG GTA assembly vector	this study	2250	TGGGCCTTTCTTCGGTAGAAAATCAAAGGATCTTCttgagatcctttttttctgcgcgtaatctgctgcttgcaaacaaaaaaaccaccgctaccagcggtggtttgtttgccggatcaagagctaccaactctttttccgaggtaactggcttcagcagagcgcagataccaaatactgttcttctagtgtagccgtagttaggccaccacttcaagaactctgtagcaccgcctacatacctcgctctgctaatcctgttaccagtggctgctgccagtggcgataagtcgtgtcttaccgggttggactcaagacgatagttaccggataaggcgcagcggtcgggctgaacggggggttcgtgcacacagcccagcttggagcgaacgacctaca…			used to make [4898] & [4954]
4880		plasmid	DR274 SEC-3' arm eef-2 3'	eef-2 3' UTR in a GG SapI AAG GTA assembly vector	this study	2309	TGGGCCTTTCTTCGGTAGAAAATCAAAGGATCTTCttgagatcctttttttctgcgcgtaatctgctgcttgcaaacaaaaaaaccaccgctaccagcggtggtttgtttgccggatcaagagctaccaactctttttccgaggtaactggcttcagcagagcgcagataccaaatactgttcttctagtgtagccgtagttaggccaccacttcaagaactctgtagcaccgcctacatacctcgctctgctaatcctgttaccagtggctgctgccagtggcgataagtcgtgtcttaccgggttggactcaagacgatagttaccggataaggcgcagcggtcgggctgaacggggggttcgtgcacacagcccagcttggagcgaacgacctaca…			used to make [4899] & [4952]
4881		plasmid	pHygGP6 tetO 13X-43 mNG	tetO 13X with tetO sites spaced 43bp apart in an RMHE compatible rRMCE vector	this study	8722	atcccgctttccagtcgggaaacctgtcgtgccagctgcattaatgaatcggccaacgcgcggggagaggcggtttgcgtattgggcgaattccgcttcctcgctcactgactcgctgcgctcggtcgttcggctgcggcgagcggtatcagctcactcaaaggcggtaatacggttatccacagaatcaggggataacgcaggaaagaacatgtgagcaaaaggccagcaaaaggccaggaaccgtaaaaaggccgcgttgctggcgtttttccataggctccgcccccctgacgagcatcacaaaaatcgacgctcaagtcagaggtggcgaaacccgacaggactataaagataccaggcgtttccccctggaagctccctcgtgcgctctcctgt…			Fig. 3, S3
4892		plasmid	pHygR2 R400 rps-0 3' ∆mec-7 nls-GFP	rps-0 3' UTR in front of the mec-7 basal promoter in an RMCE integration vector	this study	8133	atcccgctttccagtcgggaaacctgtcgtgccagctgcattaatgaatcggccaacgcgcggggagaggcggtttgcgtattgggcgaattccgcttcctcgctcactgactcgctgcgctcggtcgttcggctgcggcgagcggtatcagctcactcaaaggcggtaatacggttatccacagaatcaggggataacgcaggaaagaacatgtgagcaaaaggccagcaaaaggccaggaaccgtaaaaaggccgcgttgctggcgtttttccataggctccgcccccctgacgagcatcacaaaaatcgacgctcaagtcagaggtggcgaaacccgacaggactataaagataccaggcgtttccccctggaagctccctcgtgcgctctcctgt…			Fig. S7
4894		plasmid	pHygR2 R400 glh-2 3' ∆mec-7 nls-GFP	glh-2 3' UTR in front of the mec-7 basal promoter in an RMCE integration vector	this study	8343	atcccgctttccagtcgggaaacctgtcgtgccagctgcattaatgaatcggccaacgcgcggggagaggcggtttgcgtattgggcgaattccgcttcctcgctcactgactcgctgcgctcggtcgttcggctgcggcgagcggtatcagctcactcaaaggcggtaatacggttatccacagaatcaggggataacgcaggaaagaacatgtgagcaaaaggccagcaaaaggccaggaaccgtaaaaaggccgcgttgctggcgtttttccataggctccgcccccctgacgagcatcacaaaaatcgacgctcaagtcagaggtggcgaaacccgacaggactataaagataccaggcgtttccccctggaagctccctcgtgcgctctcctgt…			Fig. 7
4896		plasmid	pHygR2 R400 ubl-1 3' ∆mec-7 nls-GFP	ubl-1 3' UTR in front of the mec-7 basal promoter in an RMCE integration vector	this study	8268	atcccgctttccagtcgggaaacctgtcgtgccagctgcattaatgaatcggccaacgcgcggggagaggcggtttgcgtattgggcgaattccgcttcctcgctcactgactcgctgcgctcggtcgttcggctgcggcgagcggtatcagctcactcaaaggcggtaatacggttatccacagaatcaggggataacgcaggaaagaacatgtgagcaaaaggccagcaaaaggccaggaaccgtaaaaaggccgcgttgctggcgtttttccataggctccgcccccctgacgagcatcacaaaaatcgacgctcaagtcagaggtggcgaaacccgacaggactataaagataccaggcgtttccccctggaagctccctcgtgcgctctcctgt…			Fig. 7
4898		plasmid	pHygR2 R400 rps-9 3' ∆mec-7 nls-GFP	rps-9 3' UTR in front of the mec-7 basal promoter in an RMCE integration vector	this study	8257	atcccgctttccagtcgggaaacctgtcgtgccagctgcattaatgaatcggccaacgcgcggggagaggcggtttgcgtattgggcgaattccgcttcctcgctcactgactcgctgcgctcggtcgttcggctgcggcgagcggtatcagctcactcaaaggcggtaatacggttatccacagaatcaggggataacgcaggaaagaacatgtgagcaaaaggccagcaaaaggccaggaaccgtaaaaaggccgcgttgctggcgtttttccataggctccgcccccctgacgagcatcacaaaaatcgacgctcaagtcagaggtggcgaaacccgacaggactataaagataccaggcgtttccccctggaagctccctcgtgcgctctcctgt…			Fig. 7
4899		plasmid	pHygR2 R400 eef-2 3' ∆mec-7 nls-GFP	eef-2 3' UTR in front of the mec-7 basal promoter in an RMCE integration vector	this study	8316	atcccgctttccagtcgggaaacctgtcgtgccagctgcattaatgaatcggccaacgcgcggggagaggcggtttgcgtattgggcgaattccgcttcctcgctcactgactcgctgcgctcggtcgttcggctgcggcgagcggtatcagctcactcaaaggcggtaatacggttatccacagaatcaggggataacgcaggaaagaacatgtgagcaaaaggccagcaaaaggccaggaaccgtaaaaaggccgcgttgctggcgtttttccataggctccgcccccctgacgagcatcacaaaaatcgacgctcaagtcagaggtggcgaaacccgacaggactataaagataccaggcgtttccccctggaagctccctcgtgcgctctcctgt…			Fig. 7 & used to make [4840]
4900		plasmid	pHygR2 R400 ter-222 3' ∆mec-7 nls-GFP	ter-222 3' UTR in front of the mec-7 basal promoter in an RMCE integration vector	this study	8711	atcccgctttccagtcgggaaacctgtcgtgccagctgcattaatgaatcggccaacgcgcggggagaggcggtttgcgtattgggcgaattccgcttcctcgctcactgactcgctgcgctcggtcgttcggctgcggcgagcggtatcagctcactcaaaggcggtaatacggttatccacagaatcaggggataacgcaggaaagaacatgtgagcaaaaggccagcaaaaggccaggaaccgtaaaaaggccgcgttgctggcgtttttccataggctccgcccccctgacgagcatcacaaaaatcgacgctcaagtcagaggtggcgaaacccgacaggactataaagataccaggcgtttccccctggaagctccctcgtgcgctctcctgt…			Fig. 7
4935		plasmid	pHygG6 tetO 7X ∆pes-10 mNG glh-2 3' scarlet tbb-2 3'	tetO 7X pes-10 basal promoter driving mNG with a glh-2 3' UTR and a downstream sl2 and scarlet	this study	9242	atcccgctttccagtcgggaaacctgtcgtgccagctgcattaatgaatcggccaacgcgcggggagaggcggtttgcgtattgggcgaattccgcttcctcgctcactgactcgctgcgctcggtcgttcggctgcggcgagcggtatcagctcactcaaaggcggtaatacggttatccacagaatcaggggataacgcaggaaagaacatgtgagcaaaaggccagcaaaaggccaggaaccgtaaaaaggccgcgttgctggcgtttttccataggctccgcccccctgacgagcatcacaaaaatcgacgctcaagtcagaggtggcgaaacccgacaggactataaagataccaggcgtttccccctggaagctccctcgtgcgctctcctgt…			Fig. 7
4938		plasmid	pHygG6 tetO 7X ∆pes-10 scarlet rps-0 3' sl2 mNG glh-2 3'	tetO 7X pes-10 basal promoter driving scarlet with an rps-0 3' UTR and a downstream sl2 and mNG	this study	9115	atcccgctttccagtcgggaaacctgtcgtgccagctgcattaatgaatcggccaacgcgcggggagaggcggtttgcgtattgggcgaattccgcttcctcgctcactgactcgctgcgctcggtcgttcggctgcggcgagcggtatcagctcactcaaaggcggtaatacggttatccacagaatcaggggataacgcaggaaagaacatgtgagcaaaaggccagcaaaaggccaggaaccgtaaaaaggccgcgttgctggcgtttttccataggctccgcccccctgacgagcatcacaaaaatcgacgctcaagtcagaggtggcgaaacccgacaggactataaagataccaggcgtttccccctggaagctccctcgtgcgctctcctgt…			Fig. 7
4939		plasmid	pHygG6 tetO 7X ∆pes-10 scarlet glh-2 3' sl2 mNG glh-2 3'	tetO 7X pes-10 basal promoter driving scarlet with a glh-2 3' UTR and a downstream sl2 and mNG	this study	9325	atcccgctttccagtcgggaaacctgtcgtgccagctgcattaatgaatcggccaacgcgcggggagaggcggtttgcgtattgggcgaattccgcttcctcgctcactgactcgctgcgctcggtcgttcggctgcggcgagcggtatcagctcactcaaaggcggtaatacggttatccacagaatcaggggataacgcaggaaagaacatgtgagcaaaaggccagcaaaaggccaggaaccgtaaaaaggccgcgttgctggcgtttttccataggctccgcccccctgacgagcatcacaaaaatcgacgctcaagtcagaggtggcgaaacccgacaggactataaagataccaggcgtttccccctggaagctccctcgtgcgctctcctgt…			Fig. 7
4952		plasmid	pHygG6 tetO 7X ∆pes-10 scarlet eef-2 3' gpd2 mNG glh-2 3'	tetO 7X pes-10 basal promoter driving scarlet with an eef-2 3' UTR and a downstream sl2 and mNG	this study	9298	atcccgctttccagtcgggaaacctgtcgtgccagctgcattaatgaatcggccaacgcgcggggagaggcggtttgcgtattgggcgaattccgcttcctcgctcactgactcgctgcgctcggtcgttcggctgcggcgagcggtatcagctcactcaaaggcggtaatacggttatccacagaatcaggggataacgcaggaaagaacatgtgagcaaaaggccagcaaaaggccaggaaccgtaaaaaggccgcgttgctggcgtttttccataggctccgcccccctgacgagcatcacaaaaatcgacgctcaagtcagaggtggcgaaacccgacaggactataaagataccaggcgtttccccctggaagctccctcgtgcgctctcctgt…			Fig. 7
4953		plasmid	pHygG6 tetO 7X ∆pes-10 scarlet act-4 3' gpd2 mNG glh-2 3'	tetO 7X pes-10 basal promoter driving scarlet with an act-4 3' UTR and a downstream sl2 and mNG	this study	9468	atcccgctttccagtcgggaaacctgtcgtgccagctgcattaatgaatcggccaacgcgcggggagaggcggtttgcgtattgggcgaattccgcttcctcgctcactgactcgctgcgctcggtcgttcggctgcggcgagcggtatcagctcactcaaaggcggtaatacggttatccacagaatcaggggataacgcaggaaagaacatgtgagcaaaaggccagcaaaaggccaggaaccgtaaaaaggccgcgttgctggcgtttttccataggctccgcccccctgacgagcatcacaaaaatcgacgctcaagtcagaggtggcgaaacccgacaggactataaagataccaggcgtttccccctggaagctccctcgtgcgctctcctgt…			Fig. 7
4954		plasmid	pHygG6 tetO 7X ∆pes-10 scarlet rps-9 3' gpd2 mNG glh-2 3'	tetO 7X pes-10 basal promoter driving scarlet with an rps-9 3' UTR and a downstream sl2 and mNG	this study	9239	atcccgctttccagtcgggaaacctgtcgtgccagctgcattaatgaatcggccaacgcgcggggagaggcggtttgcgtattgggcgaattccgcttcctcgctcactgactcgctgcgctcggtcgttcggctgcggcgagcggtatcagctcactcaaaggcggtaatacggttatccacagaatcaggggataacgcaggaaagaacatgtgagcaaaaggccagcaaaaggccaggaaccgtaaaaaggccgcgttgctggcgtttttccataggctccgcccccctgacgagcatcacaaaaatcgacgctcaagtcagaggtggcgaaacccgacaggactataaagataccaggcgtttccccctggaagctccctcgtgcgctctcctgt…			Fig. 7
4955		plasmid	pHygG6 tetO 7X ∆pes-10 scarlet ter-222 3' gpd2 mNG glh-2 3'	tetO 7X pes-10 basal promoter driving scarlet with a ter-222 3' UTR and a downstream sl2 and mNG	this study	9693	atcccgctttccagtcgggaaacctgtcgtgccagctgcattaatgaatcggccaacgcgcggggagaggcggtttgcgtattgggcgaattccgcttcctcgctcactgactcgctgcgctcggtcgttcggctgcggcgagcggtatcagctcactcaaaggcggtaatacggttatccacagaatcaggggataacgcaggaaagaacatgtgagcaaaaggccagcaaaaggccaggaaccgtaaaaaggccgcgttgctggcgtttttccataggctccgcccccctgacgagcatcacaaaaatcgacgctcaagtcagaggtggcgaaacccgacaggactataaagataccaggcgtttccccctggaagctccctcgtgcgctctcctgt…			Fig. 7
4956		plasmid	pHygG6 tetO 7X ∆pes-10 scarlet ubl-1 3' gpd2 mNG glh-2 3'	tetO 7X pes-10 basal promoter driving scarlet with a ubl-1 3' UTR and a downstream sl2 and mNG	this study	9250	atcccgctttccagtcgggaaacctgtcgtgccagctgcattaatgaatcggccaacgcgcggggagaggcggtttgcgtattgggcgaattccgcttcctcgctcactgactcgctgcgctcggtcgttcggctgcggcgagcggtatcagctcactcaaaggcggtaatacggttatccacagaatcaggggataacgcaggaaagaacatgtgagcaaaaggccagcaaaaggccaggaaccgtaaaaaggccgcgttgctggcgtttttccataggctccgcccccctgacgagcatcacaaaaatcgacgctcaagtcagaggtggcgaaacccgacaggactataaagataccaggcgtttccccctggaagctccctcgtgcgctctcctgt…			Fig. 7
4958		plasmid	pHygR2 tetO 7X ∆pes-10 GFP-C1	tetO 7X pes-10 basal promoter driving GFP-C1 in an RMCE integration vector	this study	7602	atcccgctttccagtcgggaaacctgtcgtgccagctgcattaatgaatcggccaacgcgcggggagaggcggtttgcgtattgggcgaattccgcttcctcgctcactgactcgctgcgctcggtcgttcggctgcggcgagcggtatcagctcactcaaaggcggtaatacggttatccacagaatcaggggataacgcaggaaagaacatgtgagcaaaaggccagcaaaaggccaggaaccgtaaaaaggccgcgttgctggcgtttttccataggctccgcccccctgacgagcatcacaaaaatcgacgctcaagtcagaggtggcgaaacccgacaggactataaagataccaggcgtttccccctggaagctccctcgtgcgctctcctgt…			for Fig. 5
5030		plasmid	DR274 5' arm-CT tetO 7X Kozak	tetO 7X with a kozak ATG in a GG SapI TGG ATG assembly vector	this study	2177	TGGGCCTTTCTTCGGTAGAAAATCAAAGGATCTTCttgagatcctttttttctgcgcgtaatctgctgcttgcaaacaaaaaaaccaccgctaccagcggtggtttgtttgccggatcaagagctaccaactctttttccgaggtaactggcttcagcagagcgcagataccaaatactgttcttctagtgtagccgtagttaggccaccacttcaagaactctgtagcaccgcctacatacctcgctctgctaatcctgttaccagtggctgctgccagtggcgataagtcgtgtcttaccgggttggactcaagacgatagttaccggataaggcgcagcggtcgggctgaacggggggttcgtgcacacagcccagcttggagcgaacgacctaca…			used to make [5034]
5031		plasmid	DR274 5' arm-CT tetO 7X ts Kozak	tetO 7X with a trans-splice signal andkozak ATG in a GG SapI TGG ATG assembly vector	this study	2184	TGGGCCTTTCTTCGGTAGAAAATCAAAGGATCTTCttgagatcctttttttctgcgcgtaatctgctgcttgcaaacaaaaaaaccaccgctaccagcggtggtttgtttgccggatcaagagctaccaactctttttccgaggtaactggcttcagcagagcgcagataccaaatactgttcttctagtgtagccgtagttaggccaccacttcaagaactctgtagcaccgcctacatacctcgctctgctaatcctgttaccagtggctgctgccagtggcgataagtcgtgtcttaccgggttggactcaagacgatagttaccggataaggcgcagcggtcgggctgaacggggggttcgtgcacacagcccagcttggagcgaacgacctaca…			used to make [5035]
5034		plasmid	pHygRP2 tetO 7X Kozak GFP tbb-2 3'	tetO 7X driving GFP-C1 with only a Kozak seqence as basal promoter in an RMCE integration vector	this study	7993	atcccgctttccagtcgggaaacctgtcgtgccagctgcattaatgaatcggccaacgcgcggggagaggcggtttgcgtattgggcgaattccgcttcctcgctcactgactcgctgcgctcggtcgttcggctgcggcgagcggtatcagctcactcaaaggcggtaatacggttatccacagaatcaggggataacgcaggaaagaacatgtgagcaaaaggccagcaaaaggccaggaaccgtaaaaaggccgcgttgctggcgtttttccataggctccgcccccctgacgagcatcacaaaaatcgacgctcaagtcagaggtggcgaaacccgacaggactataaagataccaggcgtttccccctggaagctccctcgtgcgctctcctgt…			Fig. 6, S6
5035		plasmid	pHygRP2 tetO 7X ts Kozak GFP tbb-2 3'	tetO 7X driving GFP-C1 with only a trans-splicing signal and Kozak seqence as basal promoter in an RMCE integration vector	this study	8000	atcccgctttccagtcgggaaacctgtcgtgccagctgcattaatgaatcggccaacgcgcggggagaggcggtttgcgtattgggcgaattccgcttcctcgctcactgactcgctgcgctcggtcgttcggctgcggcgagcggtatcagctcactcaaaggcggtaatacggttatccacagaatcaggggataacgcaggaaagaacatgtgagcaaaaggccagcaaaaggccaggaaccgtaaaaaggccgcgttgctggcgtttttccataggctccgcccccctgacgagcatcacaaaaatcgacgctcaagtcagaggtggcgaaacccgacaggactataaagataccaggcgtttccccctggaagctccctcgtgcgctctcctgt…			Fig. 6, S6
4177-4200		plasmid	DR274 5' arm tetO 6X	tetO 6X sequences in a GG SapI TGG GCG assembly vector	this study	2051	TGGGCCTTTCTTCGGTAGAAAATCAAAGGATCTTCttgagatcctttttttctgcgcgtaatctgctgcttgcaaacaaaaaaaccaccgctaccagcggtggtttgtttgccggatcaagagctaccaactctttttccgaggtaactggcttcagcagagcgcagataccaaatactgttcttctagtgtagccgtagttaggccaccacttcaagaactctgtagcaccgcctacatacctcgctctgctaatcctgttaccagtggctgctgccagtggcgataagtcgtgtcttaccgggttggactcaagacgatagttaccggataaggcgcagcggtcgggctgaacggggggttcgtgcacacagcccagcttggagcgaacgacctaca…			used to make [4201-4214]
4201-4214		plasmid	pLF3FShC tetO 6X GFP-C1	tetO 6X mec-7 basal promoter driving GFP-C1 in an RMCE integration vector	this study	9329	GAAGTTCCTATTCtctagaaaGTATAGGAACTTCATGAAAAAGCCTGAACTCACCGCGACGTCTGTCGAGAAGTTTCTGATCGAAAAGTTCGACAGCGTCTCCGACCTGATGCAGCTCTCGGAGGGCGAAGAATCTCGTGCTTTCAGCTTCGATGTAGGAGGGCGTGGATATGTCCTGCGGGTAAATAGCTGCGCCGATGGTTTCTACAAAGATCGTTATGTTTATCGGCACTTTGCATCGGCCGCGCTCCCGATTCCGGAAGTGCTTGACATTGGGGAATTCAGCGAGAGCCTGACCTATTGCATCTCCCGCCGTGCACAGGGTGTCACGTTGCAAGACCTGCCTGAAACCGAACTGCCCGCTGTTCTGCAGCCGGTCGCGGAGGCCATGGATGCGAT…			used to make [4271],[4273],& [4275]

## Sheet: Oligonucleotides
NMo #	Sequence	Use
6476	atGGTCTCagATGGTTTCCAAGGGAGAGGCCG	construction of [4140]
6565	GGTCTTGCAACGTGACACCC	construction of [4837] & [4838]
6575	TGGCTGAATTCGCTCTTCgTGGcttgcatgcccgtc	construction of [3771] & [3772]
6594	gcGGTCTCTtCATttttctaccggctga	construction of [4337] & [4345]
6650	ttggtctcagaagtaaattttttgccccttccacc	construction of [3907]
6668	GAGAAGCTTGCTCTTCTCGCacgcctacctcgac	construction of [3771] & [3772]
6682	aGGTCTCAacccagatacattttccgtc	construction of [4355]
6786	AAGACTGCTCCAAAGAAGAAGCGTAAGGTACCGGTAGAAAAA	construction of [4004]
6787	CGTTTTTTCTACCGGTACCTTACGCTTCTTCTTTGGAGCAGT	construction of [4004]
6788	CTAGTGGAACCGAAGAGCCTGCA	construction of [3848] & [4591]
6789	GGCTCTTCGGTTCCA	construction of [3848] & [4591]
6806	GGTCTCAgAACCGCTGCTTCTCTTG	construction of [3851]
6807	GGTCTCTgccagtctacgaggttttctattgtatc	construction of [3851]
6884	ggGAAGTTCCTATACttatatgaGAATAGGAACTTC	construction of [3953]
6885	gCCAGAAGTTCCTATTCtcatataaGTATAGGAACT	construction of [3953]
6886	aGGTCTCAgAACaaagcttcccgcgtgcaag	construction of [3953]
6887	tGGTCTCACtgtttaaacttacCTTCATtgttgtttgcagcaagag	construction of [3953]
6888	aGGTCTCaAACTTCtttcagGCTGCTTCTCTTGTTTCATAAg	construction of [3953]
6889	aGGTCTCaTCccggggtctacgaggttttctattgtatc	construction of [3953]
6904	gACGGAAGTTCCTATACttatatgaGAATAGGAACTTC	construction of [3907]
6905	cTACGAAGTTCCTATTCtcatataaGTATAGGAACTTC	construction of [3907]
6906	GGTCTCTCGTccgctcagtattgg	construction of [3907]
6907	GGTCTCAgTGGcaccctctcaacacc	construction of [3905]
6908	GGTCTCGtCATttttgttagattggtaggagc	construction of [3905]
6968	acaGAAGTTCCTATTCtatcaagaGTATAGG	construction of [3953]
6969	AGTTCCTATACtcttgataGAATAGGAACTT	construction of [3953]
6972	tGGTCTCAgTGGCCTTCCAAGTTATTGACAAGTATTAAC	construction of [3947]
6973	cGGTCTCTtCATgatttaatcactgaaaattatttcaa	construction of [3947]
7029	GCGCGTAGACGAAAAGCGAATCCGACAAAACTGAGTGAAAACGCGAAGAAGCTTGCCAAG	construction of [4004]
7030	CATCTTGGCAAGCTTCTTCGCGTTTTCACTCAGTTTTGTCGGATTCGCTTTTCGTCTACG	construction of [4004]
7046	CTTGCTCTTCgCGTCTTGTAGAGTTCATCC	construction of [4069]
7047	TTCGCTCTTCgGGTATGCCACAATTCGACATTC	construction of [4069]
7064	AATTCGCTCTTCgGCGctgcatg	construction of [4065]
7065	cagCGCcGAAGAGCG	construction of [4065]
7072	cgagtgaagacgggca	construction of [4077] & [4079]
7073	tGGTCTCAgAACcttgcatgcccgtc	construction of [4061] & [4062]
7075	cGGTCTCTgCCAacgcctacctcgac	construction of [4061] & [4062]
7077	gagtttactccctatcagtgatag	construction of [4077] & [4079]
7080	GAGCGTACGTACCGTCGACGATGTAGGTC	construction of [4082]
7081	CTCCACCTTAAGTGTCGACATGCCCGCC	construction of [4082]
7082	GGACCGGTgtactgacggacacaccg	construction of [4085]
7083	TCTTCCAATTGtcgcgctcgcgcga	construction of [4085]
7155	aGGTCTCaCCTTGTAGAGCTCGTCCATTCC	construction of [4140]
7177	agttgtgactcctcccattatt	construction of [4146]
7178	CGCcGAAGAGCGAATTCaaAAATC	construction of [4146]
7179	TGGTCTCaGTGGNNNCTCTATCATTGATAGAGNNNNNNNNNNNCCCTATCAGTGATAGAG	construction of [4191]
7180	TGGTCTCaTCGCNNNCTCTATCAATGATAGAGNNNNNNNNNNNCTCTATCACTGATAGGG	construction of [4191]
7181	TGGTCTCaATTCNNNCTCTATCATTGATAGAGNNNNNNNNNNNCCCTATCAGTGATAGAG	construction of [4191]
7182	TGGTCTCaGAATNNNCTCTATCAATGATAGAGNNNNNNNNNNNCTCTATCACTGATAGGG	construction of [4191]
7183	tcctGCTCTTCaTGGtagagcatgtacctttataggtgc	construction of [4161]
7184	tcctGCTCTTCtCATttttggtaggttttagtcgccc	construction of [4161]
7206	aGGTCTCAgTGGCCAGATGGgcCG	construction of [4225]
7207	cGGTCTCTtcgctagagtctccgctCGG	construction of [4225] & [4345]
7248	tGGTCTCAgCAAACCCTCTATCATTGATAGAGAACA	construction of [4273]
7249	cGGTCTCTGCCATCCCTCTATCAATGATAGAGCCC	construction of [4273]
7250	tGGTCTCAGAACTGCCTCTATCATTGATAGAGTCTA	construction of [4271] & [4275]
7251	cGGTCTCTgTTGACCCTCTATCAATGATAGAGCCA	construction of [4275]
7252	cGGTCTCTgTTGACCCTCTATCAATGATAGAGCCA	construction of [4271]
7264	TGGTCTCaTGGctgtcgtgccagctgcat	construction of [4481]
7265	TGGTCTCagttcccgactggaaagcgg	construction of [4481]
7282	TGGTCTCAgAMGTAAATTGTGGAAATATTTCCTTTTGTT	construction of [4314]
7283	cGGTCTCTcTACCGAATTCGGTGCATACGAG	construction of [4314] & [4765]
7307	tGGTCTCtggcggccgctctagaaC	construction of [4337]
7312	tGGTCTCAgAACtgcGGATCCGGGTAAg	construction of [4334] & [4335]
7313	cGGTCTCTgTTGCAAGCTTAAGGATAAGtGATT	construction of [4334]
7314	tGGTCTCAgCAAtgcGGATCCGGGTAAg	construction of [4336]
7315	cGGTCTCTGCCAAGCTTAAGGATAAGtGATT	construction of [4335] & [4336]
7329	attccTGCAGGCTCTTCGCCAtgctCCCCCAACTGAGA	construction of [4355]
7352	TGGTCTCAgTGGCTGGAAAGTTCCACGTGC	construction of [4410]
7353	AGGTCTCATCGCGGTTCATCCATGCATTCTCTCT	construction of [4410]
7372	tGGTCTCAgGCGCAATCCCTCATTCGGTTGG	construction of [4452]
7373	cGGTCTCTtCATTTTTTTGGGAACTGAAAGCG	construction of [4452], [4804], [4805], & [4806]
7374	tGGTCTCAgGCGAGTTAGATCATTATAACTGTGTTTAGG	construction of [4453]
7375	cGGTCTCTtCATCCTCTTTCTTGTTGTTCTT	construction of [4453]
7376	tGGTCTCAgGCGTAATTTTAAATTTTTGCCGTGAATCA	construction of [4454]
7377	cGGTCTCTtCATTTTTGCTGAAAAGGTCGT	construction of [4454], [4807], & [4808]
7385	TGGTCTCagaacgtactgacggacacaccga	construction of [4481]
7386	TGGTCTCagCCAtcgcgctcgcgcgac	construction of [4481]
7392	tGGTCTCAgGCGtcatgataaccactccagtttc	construction of [4476]
7393	cGGTCTCTtCATtctagaaaatgttcaacttgaatg	construction of [4476]
7475	GAAGAGCgaattCaaAAATCATACC	construction of [4661]
7476	gAACacgactgttcaatacgaCTG	construction of [4661]
7519	tGGTCTCAgCAAgtgctgaagctcgaaaatttggag	construction of [4713]
7520	cGGTCTCTgCCaCctggaaatttggaatttgtcgaaaatt	construction of [4713]
7521	tGGTCTCAgTGGgtaaggagttgaacggctgaa	construction of [4714]
7522	cGGTCTCTTCGCGGTGATCTCGGTGTTGACctga	construction of [4714]
7567	AGCGAaCTAGTGGCGAAGAGCggtaaccACGGCTCTTCGGTAGCGagatgtgactcct	construction of [4756]
7568	ACTTCccgggTACccaag	construction of [4756]
7573	aGGTCTCAgAAGTAAtaaatgcaaaatcctttcaagcat	construction of [4765]
7574	cGGTCTCtGCGTTACtgagacttttttcttggcgg	construction of [4765]
7575	TGGTCTCaACGCgaggagaacgtcTAAatgtattgtt	construction of [4765]
7576	cGGTCTCtACCcTGAgcctttactccctaatgtt	construction of [4765]
7577	cGGTCTCAgGGTAAATTGTGGAAATATTTCCTTTTGTTA	construction of [4765]
7578	tGGTCTCATCGCAAAATGGGATCCCCAAAGAAGA	construction of [4766]
7579	tGGTCTCAgTGGTACtgagacttttttcttggcgg	construction of [4766]
7580	TGGatatagtaggttgattgccagaaagtttcctaatgca	construction of [4775]
7581	CTTtgcattaggaaactttctggcaatcaacctactatat	construction of [4775]
7582	AGAAGAGCAAGCTTGGATCGAC	construction of [4777]
7583	CTTAATTTGCAAACCTGAAATACATT	construction of [4777]
7592	aGGTCTCagAAGTAAtcaatttgttacaatgttggttct	construction of [4797]
7593	aGGTCTCacTAcacttgcatcatcccattact	construction of [4797]
7612	tGGTCTCAgGCGGCGGGGCCAGCCGA	construction of [4804]
7613	tGGTCTCAgGCGACCAATGGCAAAGAGCGG	construction of [4805]
7614	tGGTCTCAgGCGAGCGGCGCGGACGC	construction of [4806]
7615	tGGTCTCAggcggtacttgccagctctt	construction of [4808]
7616	tGGTCTCAgGCgaatcaaatcaccaattaaacatctc	construction of [4807]
7617	ATGGCatGCTCTTCGGTAgctgtctcatcctactttcacc	construction of [4837] & [4838]
7631	cttagctCTTCaAAGCGTCAACTTGAGCTCCCA	construction of [4864]
7632	cttagctCTTCttacTTGCTCATAGGTGTTGATGTC	construction of [4864]
7644	tGGTCTCAgAAGTAAatttgttttggttacaaataaaattgttgg	construction of [4879]
7645	cGGTCTCTCtaccatgtattgtgtttgcttgatcatc	construction of [4879]
7646	tGGTCTCAgAAGTAGactgttgtccaatttttaacct	construction of [4873]
7647	cGGTCTCTCtactgcttttggccgatttctagct	construction of [4873]
7648	tGGTCTCAgAAGTAAttctgtcaagattgtttattgttaatt	construction of [4880]
7649	cGGTCTCTCtacaagagcacgtgaatttcatgtg	construction of [4880]
7772	acgcctacctcgacatac	construction of [5030], [5031]
7773	AAAAATGAGAAGAGCAAGCTTGGAT	construction of [5030]
7774	TTTCAGCAAAAATGAGAAGAGCAAGCTTGGAT	construction of [5031]

## Sheet: Transgenes and alleles
Purpose/Occurance	Designation	Chr	Description	Comments	Full Designation	Reference Strain	Reference	Parental strain (novel reagents)	Methodology	Targeting Plasmid	Sequence (of new transgene reagents)
creating jsSi2266 in Fig. 5	jsSi2026	II	[myo-2p nls-Scarlet hygR tetO 7X act-4bp GFP]		[loxP myo-2p FRT nls-Scarlet myo-2 3' rps-0p hygR unc-54 3' ori <{Amp} loxP tetO 7X act-4bp GFP-C1 tbb-2 3' FRT3]	NM6012	this study	NM5548	RMCE	NMp4487	ggctctgcttcttcgttgtaccattttgccttttcttcacacttattcttttcatacttcctgaaactccaaaatttctattaatttcgaaagatgaagaagaagaagctatcaaatctgtaaaatattatcatggagatggtacagatgcaaaacaagttttggaagatattcgaaaagaggcagaatgtgaacaagactcgagcaaatcgacaactttccaaaaaatgaaggaattgtttacagaaagacatttgagaatggcattgatattaagtgtatctgcattaaccaatacTGTCGGATTATGGGCTCTTCTTTTATCCTCTACTTTCTTTCTAGAAAATGCAAATGTTGAGTCAGAAATTGCTGAATGGAGTACAACTGCAATGGGTTTAG…
creating jsSi2279 in Fig. 5	jsSi2014	II	[myo-2p nls-scarlet hygR tetO 7X ∆lys-8 GFP]		[loxP myo-2p FRT nls-scarlet myo-2 3' rps-0p hygR unc-54 3' ori <{Amp} loxP tetO 7X ∆lys-8 GFP-C1 tbb-2 3' FRT3]	NM5995	this study	NM5548	RMCE	NMp4490	ggctctgcttcttcgttgtaccattttgccttttcttcacacttattcttttcatacttcctgaaactccaaaatttctattaatttcgaaagatgaagaagaagaagctatcaaatctgtaaaatattatcatggagatggtacagatgcaaaacaagttttggaagatattcgaaaagaggcagaatgtgaacaagactcgagcaaatcgacaactttccaaaaaatgaaggaattgtttacagaaagacatttgagaatggcattgatattaagtgtatctgcattaaccaatacTGTCGGATTATGGGCTCTTCTTTTATCCTCTACTTTCTTTCTAGAAAATGCAAATGTTGAGTCAGAAATTGCTGAATGGAGTACAACTGCAATGGGTTTAG…
creating jsSi2280 in Fig. 5	jsSi2003	II	[myo-2p nls-scarlet hygR tetO 7X ∆tbb-2p GFP]		[loxP myo-2p FRT nls-scarlet myo-2 3' rps-0p hygR unc-54 3' ori <{Amp} loxP tetO 7X ∆tbb-2p GFP-C1 tbb-2 3' FRT3]	NM5984	this study	NM5548	RMCE	NMp4489	ggctctgcttcttcgttgtaccattttgccttttcttcacacttattcttttcatacttcctgaaactccaaaatttctattaatttcgaaagatgaagaagaagaagctatcaaatctgtaaaatattatcatggagatggtacagatgcaaaacaagttttggaagatattcgaaaagaggcagaatgtgaacaagactcgagcaaatcgacaactttccaaaaaatgaaggaattgtttacagaaagacatttgagaatggcattgatattaagtgtatctgcattaaccaatacTGTCGGATTATGGGCTCTTCTTTTATCCTCTACTTTCTTTCTAGAAAATGCAAATGTTGAGTCAGAAATTGCTGAATGGAGTACAACTGCAATGGGTTTAG…
creating jsSi2312 in Fig. 7	jsSi2296	II	[myo-2p scarlet hygR tbb-2 3' ∆mec-7p nls-GFP]		[loxP myo-2p FRT scarlet myo-2 3' <{rps-0p hygR unc-54 3'} ori Amp loxP tbb-2 3' ∆mec-7p nls-GFP let-858 3' FRT3] II	NM6331	this study	NM5548	RMCE	NMp4775	ggctctgcttcttcgttgtaccattttgccttttcttcacacttattcttttcatacttcctgaaactccaaaatttctattaatttcgaaagatgaagaagaagaagctatcaaatctgtaaaatattatcatggagatggtacagatgcaaaacaagttttggaagatattcgaaaagaggcagaatgtgaacaagactcgagcaaatcgacaactttccaaaaaatgaaggaattgtttacagaaagacatttgagaatggcattgatattaagtgtatctgcattaaccaatacTGTCGGATTATGGGCTCTTCTTTTATCCTCTACTTTCTTTCTAGAAAATGCAAATGTTGAGTCAGAAATTGCTGAATGGAGTACAACTGCAATGGGTTTAG…
creating jsSi2447 in Fig. 5	jsSi2435	II	[myo-2p Scarlet 2X hygR tetO 7X ∆pes-10p GFP]		[loxP myo-2p FRTScarlet 2X myo-2 3' <{rps-0p hygR unc-54 3'} ori <{Amp} loxP tetO 7X ∆pes-10p GFP-C1 tbb-2 3' FRT3]	NM6523	this study	NM5548	RMCE	NMp4958	ggctctgcttcttcgttgtaccattttgccttttcttcacacttattcttttcatacttcctgaaactccaaaatttctattaatttcgaaagatgaagaagaagaagctatcaaatctgtaaaatattatcatggagatggtacagatgcaaaacaagttttggaagatattcgaaaagaggcagaatgtgaacaagactcgagcaaatcgacaactttccaaaaaatgaaggaattgtttacagaaagacatttgagaatggcattgatattaagtgtatctgcattaaccaatacTGTCGGATTATGGGCTCTTCTTTTATCCTCTACTTTCTTTCTAGAAAATGCAAATGTTGAGTCAGAAATTGCTGAATGGAGTACAACTGCAATGGGTTTAG…
creating male producing strains	e1489	IV	him-8 allele	CGC	him-8(e1489) IV	CB1489	Hodgkin et al. 1979
Fig. 1	jsSi1711	II	[14X tetO ∆mec-7p GFP]		[loxP 14X tetO ∆mec-7p GFP-C1 tbb-2 3' FRT3] II	NM6624	this study	NM5402	RMCE	NMp4058	ATTTCGTGGTTTATATCCTCTGAACTGGTACCTCAAAAACATCGTAGTATTGCTCAATCTGTGGCATATTCAATGAATACTGTAATGGTGGTTATCAGTACATTTACAGTATTACCTCTATATTCCGTTATTGGTAGTTATGCTTTCCTTATTCTATATTCAATTCCTTCATTTATAAGTATGCTTATATTATTTCGCTACTTACCGGAAACCAAAGGACGAGAGATTCATGATATTGTGAATGAACTTAAAAAAAAATGAAAACCTTTGAAAACGTTCATACGGCCGAAATTTTACTTGATCGAGCCAATTGAACTTTTGTTAAGACTTACAGAAAAGTGAGAGATTTTGTTACAAAAAAGTGAGAAAAAAGCGAAAATGAACAGGAAAAAGAAGAAA…
Fig. 1	jsSi1712	II	[4X tetO ∆mec-7p GFP]		[loxP 4X tetO ∆mec-7p GFP-C1 tbb-2 3' FRT3] II	NM6620	this study	NM5402	RMCE	NMp4012	ATTTCGTGGTTTATATCCTCTGAACTGGTACCTCAAAAACATCGTAGTATTGCTCAATCTGTGGCATATTCAATGAATACTGTAATGGTGGTTATCAGTACATTTACAGTATTACCTCTATATTCCGTTATTGGTAGTTATGCTTTCCTTATTCTATATTCAATTCCTTCATTTATAAGTATGCTTATATTATTTCGCTACTTACCGGAAACCAAAGGACGAGAGATTCATGATATTGTGAATGAACTTAAAAAAAAATGAAAACCTTTGAAAACGTTCATACGGCCGAAATTTTACTTGATCGAGCCAATTGAACTTTTGTTAAGACTTACAGAAAAGTGAGAGATTTTGTTACAAAAAAGTGAGAAAAAAGCGAAAATGAACAGGAAAAAGAAGAAA…
Fig. 1	jsSi1713	II	[2X tetO ∆mec-7p GFP]		[loxP 2X tetO ∆mec-7p GFP-C1 tbb-2 3' FRT3] II	NM6619	this study	NM5402	RMCE	NMp4011	ATTTCGTGGTTTATATCCTCTGAACTGGTACCTCAAAAACATCGTAGTATTGCTCAATCTGTGGCATATTCAATGAATACTGTAATGGTGGTTATCAGTACATTTACAGTATTACCTCTATATTCCGTTATTGGTAGTTATGCTTTCCTTATTCTATATTCAATTCCTTCATTTATAAGTATGCTTATATTATTTCGCTACTTACCGGAAACCAAAGGACGAGAGATTCATGATATTGTGAATGAACTTAAAAAAAAATGAAAACCTTTGAAAACGTTCATACGGCCGAAATTTTACTTGATCGAGCCAATTGAACTTTTGTTAAGACTTACAGAAAAGTGAGAGATTTTGTTACAAAAAAGTGAGAAAAAAGCGAAAATGAACAGGAAAAAGAAGAAA…
Fig. 1, 2, 4, S1, S2	jsSi1560	IV	[mec-4p tTA-L-QF]		[loxP mec-4p tTA-L-QF FRT3] IV	NM5295	Nonet, 2020
Fig. 1, 2, 4, S1, S2, S4	jsSi1543	I	[7X tetO ∆mec-7p GFP]		[mosL loxP 7X tetO ∆mec-7p GFP-C1 tbb-2 3' FRT3 mosR] I	NM5264	Nonet, 2020
Fig. 1, 2, 4, S1, S2, S4	jsSi1638	I	[2X tetO ∆mec-7p GFP]		[mosL loxP 2X tetO ∆mec-7p GFP-C1 tbb-2 3' UTR FRT3] I	NM5440	this study	NM5161	RMCE	NMp4011	tctgcgctctatctctacaatgataagagctatcaaaaagttattaactagtaaaatatagacaatttcaagcttaacattttgataattaataacttttttgtatgttaaaccgttaaggagttatgggagattaaaaaagtagtatgcacagagggaggcacttcaattgtatgcgctctgtctcaacaatgataagagctatcaaaaagttattaactgtgaaaatgtagaaaaatttaagtttaacattttgttagtcaataacttttttttattttaacccgttgaggagttatggaagattgaaaaagtagaatgcaccgagggaggtactccaattgtctgcgctcttatctccacgggggtgagagatatcaaaaagttgtcaacggacaa…
Fig. 1, 2, 4, S1, S2, S4	jsSi1639	I	[4X tetO ∆mec-7p GFP]		[mosL loxP 4X tetO ∆mec-7p GFP-C1 tbb-2 3' FRT3] I	NM5439	this study	NM5161	RMCE	NMp4012	tctgcgctctatctctacaatgataagagctatcaaaaagttattaactagtaaaatatagacaatttcaagcttaacattttgataattaataacttttttgtatgttaaaccgttaaggagttatgggagattaaaaaagtagtatgcacagagggaggcacttcaattgtatgcgctctgtctcaacaatgataagagctatcaaaaagttattaactgtgaaaatgtagaaaaatttaagtttaacattttgttagtcaataacttttttttattttaacccgttgaggagttatggaagattgaaaaagtagaatgcaccgagggaggtactccaattgtctgcgctcttatctccacgggggtgagagatatcaaaaagttgtcaacggacaa…
Fig. 1, 2, 4, S1, S2, S4	jsSi1657	I	[14X tetO ∆mec-7p GFP]		[mosL loxP 14X tetO ∆mec-7p GFP-C1 tbb-2 3' FRT3] I	NM5464	this study	NM5161	RMCE	NMp4058	tctgcgctctatctctacaatgataagagctatcaaaaagttattaactagtaaaatatagacaatttcaagcttaacattttgataattaataacttttttgtatgttaaaccgttaaggagttatgggagattaaaaaagtagtatgcacagagggaggcacttcaattgtatgcgctctgtctcaacaatgataagagctatcaaaaagttattaactgtgaaaatgtagaaaaatttaagtttaacattttgttagtcaataacttttttttattttaacccgttgaggagttatggaagattgaaaaagtagaatgcaccgagggaggtactccaattgtctgcgctcttatctccacgggggtgagagatatcaaaaagttgtcaacggacaa…
Fig. 1, 2, 4, S1, S2, S4	jsSi1665	I	[21X tetO ∆mec-7p GFP]		[mosL loxP 21X tetO ∆mec-7p GFP-C1 tbb-2 3' FRT3] I	NM5480	this study	NM5161	RMCE	NMp4073	tctgcgctctatctctacaatgataagagctatcaaaaagttattaactagtaaaatatagacaatttcaagcttaacattttgataattaataacttttttgtatgttaaaccgttaaggagttatgggagattaaaaaagtagtatgcacagagggaggcacttcaattgtatgcgctctgtctcaacaatgataagagctatcaaaaagttattaactgtgaaaatgtagaaaaatttaagtttaacattttgttagtcaataacttttttttattttaacccgttgaggagttatggaagattgaaaaagtagaatgcaccgagggaggtactccaattgtctgcgctcttatctccacgggggtgagagatatcaaaaagttgtcaacggacaa…
Fig. 1, 2, 4, S1, S2, S4	jsSi1667	I	[28X tetO ∆mec-7p GFP]		[mosL loxP 28X tetO ∆mec-7p GFP-C1 tbb-2 3' FRT3] I	NM5466	this study	NM5161	RMCE	NMp4073	tctgcgctctatctctacaatgataagagctatcaaaaagttattaactagtaaaatatagacaatttcaagcttaacattttgataattaataacttttttgtatgttaaaccgttaaggagttatgggagattaaaaaagtagtatgcacagagggaggcacttcaattgtatgcgctctgtctcaacaatgataagagctatcaaaaagttattaactgtgaaaatgtagaaaaatttaagtttaacattttgttagtcaataacttttttttattttaacccgttgaggagttatggaagattgaaaaagtagaatgcaccgagggaggtactccaattgtctgcgctcttatctccacgggggtgagagatatcaaaaagttgtcaacggacaa…
Fig. 1, 2, S1, S2	jsSi1666	I	[1X tetO ∆mec-7p GFP]		[mosL loxP 1X tetO ∆mec-7p GFP-C1 tbb-2 3' FRT3] I	NM5465	this study	NM5161	RMCE	NMp4080	tctgcgctctatctctacaatgataagagctatcaaaaagttattaactagtaaaatatagacaatttcaagcttaacattttgataattaataacttttttgtatgttaaaccgttaaggagttatgggagattaaaaaagtagtatgcacagagggaggcacttcaattgtatgcgctctgtctcaacaatgataagagctatcaaaaagttattaactgtgaaaatgtagaaaaatttaagtttaacattttgttagtcaataacttttttttattttaacccgttgaggagttatggaagattgaaaaagtagaatgcaccgagggaggtactccaattgtctgcgctcttatctccacgggggtgagagatatcaaaaagttgtcaacggacaa…
Fig. 1, 3, 5	jsSi1675	II	[7X tetO ∆mec-7p GFP]		[loxP 7X tetO ∆mec-7p GFP-C1 tbb-2 3' FRT3] II	NM5494	this study	NM5402	RMCE	NMp3774	ATTTCGTGGTTTATATCCTCTGAACTGGTACCTCAAAAACATCGTAGTATTGCTCAATCTGTGGCATATTCAATGAATACTGTAATGGTGGTTATCAGTACATTTACAGTATTACCTCTATATTCCGTTATTGGTAGTTATGCTTTCCTTATTCTATATTCAATTCCTTCATTTATAAGTATGCTTATATTATTTCGCTACTTACCGGAAACCAAAGGACGAGAGATTCATGATATTGTGAATGAACTTAAAAAAAAATGAAAACCTTTGAAAACGTTCATACGGCCGAAATTTTACTTGATCGAGCCAATTGAACTTTTGTTAAGACTTACAGAAAAGTGAGAGATTTTGTTACAAAAAAGTGAGAAAAAAGCGAAAATGAACAGGAAAAAGAAGAAA…
Fig. 2, S2	jsSi1517	I	[5X QUAS ∆pes-10pGFP]		[mosL loxP 5X QUAS ∆pes-10p GFP-C1 tbb-2 3' FRT3 mosR] I	NM5212	Nonet, 2020
Fig. 2, S2	jsSi1527	I	[5X lexO ∆pes-10p GFP]		[mosL loxP 5X lexO ∆pes-10p GFP-C1 tbb-2 3' FRT3 mosR] IV	NM5227	Nonet, 2020
Fig. 2, S2, S3	jsSi1549	IV	[mec-4p lexA-L-QF]		[mosL loxP mec-4p lexA-L-QF act-4 3' FRT3 mosR] IV	NM5268	Nonet, 2020
Fig. 2, S2, S3	jsSi1554	IV	[mec-4p QF2]		[mosL loxP mec-4p QF2 act-4 3' FRT3 mosR] IV	NM5273	Nonet, 2020
Fig. 2, S2	jsSi1588	IV	[mec-4p GAL4SK-L-QF]		[mosL loxP mec-4p GAL4SK-L-QF act-4 3' FRT3 mosR] IV	NM5353	Nonet, 2021a
Fig. 2, S2	jsSi1692	I	[8X lexO ∆pes-10p GFP]	nanoPore Sequenced	[mosL loxP 8X lexO ∆pes-10p GFP-C1 tbb-2 3' FRT3 mosR] I	NM5513	this study	NM5161	RMCE	NMp4100	tctgcgctctatctctacaatgataagagctatcaaaaagttattaactagtaaaatatagacaatttcaagcttaacattttgataattaataacttttttgtatgttaaaccgttaaggagttatgggagattaaaaaagtagtatgcacagagggaggcacttcaattgtatgcgctctgtctcaacaatgataagagctatcaaaaagttattaactgtgaaaatgtagaaaaatttaagtttaacattttgttagtcaataacttttttttattttaacccgttgaggagttatggaagattgaaaaagtagaatgcaccgagggaggtactccaattgtctgcgctcttatctccacgggggtgagagatatcaaaaagttgtcaacggacaa…
Fig. 2, S2	jsSi1693	I	[13X lexO ∆pes-10p GFP]		[mosL loxP 13X lexO ∆pes-10p GFP-C1 tbb-2 3' FRT3 mosR] I	NM5511	this study	NM5161	RMCE	NMp4101	tctgcgctctatctctacaatgataagagctatcaaaaagttattaactagtaaaatatagacaatttcaagcttaacattttgataattaataacttttttgtatgttaaaccgttaaggagttatgggagattaaaaaagtagtatgcacagagggaggcacttcaattgtatgcgctctgtctcaacaatgataagagctatcaaaaagttattaactgtgaaaatgtagaaaaatttaagtttaacattttgttagtcaataacttttttttattttaacccgttgaggagttatggaagattgaaaaagtagaatgcaccgagggaggtactccaattgtctgcgctcttatctccacgggggtgagagatatcaaaaagttgtcaacggacaa…
Fig. 2, S2	jsSi1751	II	[6X tetO ∆mec-7p GFP]		[loxP 6X tetO ∆mec-7p GFP-C1 tbb-2 3' FRT3] II	NM5605	this study	NM5402	RMCE	NMp4201	ATTTCGTGGTTTATATCCTCTGAACTGGTACCTCAAAAACATCGTAGTATTGCTCAATCTGTGGCATATTCAATGAATACTGTAATGGTGGTTATCAGTACATTTACAGTATTACCTCTATATTCCGTTATTGGTAGTTATGCTTTCCTTATTCTATATTCAATTCCTTCATTTATAAGTATGCTTATATTATTTCGCTACTTACCGGAAACCAAAGGACGAGAGATTCATGATATTGTGAATGAACTTAAAAAAAAATGAAAACCTTTGAAAACGTTCATACGGCCGAAATTTTACTTGATCGAGCCAATTGAACTTTTGTTAAGACTTACAGAAAAGTGAGAGATTTTGTTACAAAAAAGTGAGAAAAAAGCGAAAATGAACAGGAAAAAGAAGAAA…
Fig. 2, S2	jsSi1792	I	[14X UAS ∆pes-10p GFP]		[loxP UAS 14X GFP-C1 tbb-2 3' FRT3 mosR] I	NM5684	this study	NM5322	RMCE	NMp4238	tctgcgctctatctctacaatgataagagctatcaaaaagttattaactagtaaaatatagacaatttcaagcttaacattttgataattaataacttttttgtatgttaaaccgttaaggagttatgggagattaaaaaagtagtatgcacagagggaggcacttcaattgtatgcgctctgtctcaacaatgataagagctatcaaaaagttattaactgtgaaaatgtagaaaaatttaagtttaacattttgttagtcaataacttttttttattttaacccgttgaggagttatggaagattgaaaaagtagaatgcaccgagggaggtactccaattgtctgcgctcttatctccacgggggtgagagatatcaaaaagttgtcaacggacaa…
Fig. 2, S2	jsSi1793	I	[22X UAS ∆pes-10p GFP]		[mosL loxP UAS 22X GFP-C1 tbb-2 3' FRT3 mosR] I	NM5685	this study	NM5402	RMCE	NMp4236	tctgcgctctatctctacaatgataagagctatcaaaaagttattaactagtaaaatatagacaatttcaagcttaacattttgataattaataacttttttgtatgttaaaccgttaaggagttatgggagattaaaaaagtagtatgcacagagggaggcacttcaattgtatgcgctctgtctcaacaatgataagagctatcaaaaagttattaactgtgaaaatgtagaaaaatttaagtttaacattttgttagtcaataacttttttttattttaacccgttgaggagttatggaagattgaaaaagtagaatgcaccgagggaggtactccaattgtctgcgctcttatctccacgggggtgagagatatcaaaaagttgtcaacggacaa…
Fig. 2, S2	jsSi1794	I	[3X UAS ∆pes-10p GFP]		[loxP UAS 3X GFP-C1 tbb-2 3' FRT3 mosR] I	NM5686	this study	NM5322	RMCE	NMp4237	tctgcgctctatctctacaatgataagagctatcaaaaagttattaactagtaaaatatagacaatttcaagcttaacattttgataattaataacttttttgtatgttaaaccgttaaggagttatgggagattaaaaaagtagtatgcacagagggaggcacttcaattgtatgcgctctgtctcaacaatgataagagctatcaaaaagttattaactgtgaaaatgtagaaaaatttaagtttaacattttgttagtcaataacttttttttattttaacccgttgaggagttatggaagattgaaaaagtagaatgcaccgagggaggtactccaattgtctgcgctcttatctccacgggggtgagagatatcaaaaagttgtcaacggacaa…
Fig. 2, S2	jsSi1806	II	[12X tetO ∆mec-7p GFP]		[loxP 12X tetO ∆mec-7p GFP-C1 tbb-2 3' FRT3] II	NM5714	this study	NM5402	RMCE	NMp4276	TGTCGGATTATGGGCTCTTCTTTTATCCTCTACTTTCTTTCTAGAAAATGCAAATGTTGAGTCAGAAATTGCTGAATGGAGTACAACTGCAATGGGTTTAGCTTATGTTTCTGGAACAATTACTGGTGGAATTGTGATTGAAAAGTAAGGTTATATTTCATTTCAATAAATGTTACCACAGTATAACAAAAACAAGTTACATTGTTCAGAGTATGTCTGAATGTATTATTATTATTGTATTTGTGCATCAGTACTGTAGTTGTACTGAAGAAGGGTTTAAAATAATCTCAACGTTTTTAAGACGAGTTAGTGAGAATACGGTCGCAGTTAGGATGTTTGGACATAGTTTTATTAGATAATCGTGAACTAACTCACTATAAAAACCCGCTAACTCATTGA…
Fig. 2, S2	jsSi1807	II	[18X tetO ∆mec-7p GFP]	nanoPore Sequenced	[loxP 18X tetO ∆mec-7p GFP-C1 tbb-2 3' FRT3] II	NM5715	this study	NM5402	RMCE	NMp4277	TGTCGGATTATGGGCTCTTCTTTTATCCTCTACTTTCTTTCTAGAAAATGCAAATGTTGAGTCAGAAATTGCTGAATGGAGTACAACTGCAATGGGTTTAGCTTATGTTTCTGGAACAATTACTGGTGGAATTGTGATTGAAAAGTAAGGTTATATTTCATTTCAATAAATGTTACCACAGTATAACAAAAACAAGTTACATTGTTCAGAGTATGTCTGAATGTATTATTATTATTGTATTTGTGCATCAGTACTGTAGTTGTACTGAAGAAGGGTTTAAAATAATCTCAACGTTTTTAAGACGAGTTAGTGAGAATACGGTCGCAGTTAGGATGTTTGGACATAGTTTTATTAGATAATCGTGAACTAACTCACTATAAAAACCCGCTAACTCATTGA…
Fig. 2, S2	jsSi1885	I	[10X QUAS ∆pes-10p GFP]		[mosL loxP 10X QUAS ∆pes-10p GFP-C1 tbb-2 3' FRT3 mosR] I	NM5858	this study	NM5549	RMCE	NMp4357	tctgcgctctatctctacaatgataagagctatcaaaaagttattaactagtaaaatatagacaatttcaagcttaacattttgataattaataacttttttgtatgttaaaccgttaaggagttatgggagattaaaaaagtagtatgcacagagggaggcacttcaattgtatgcgctctgtctcaacaatgataagagctatcaaaaagttattaactgtgaaaatgtagaaaaatttaagtttaacattttgttagtcaataacttttttttattttaacccgttgaggagttatggaagattgaaaaagtagaatgcaccgagggaggtactccaattgtctgcgctcttatctccacgggggtgagagatatcaaaaagttgtcaacggacaa…
Fig. 2, S2	jsSi1886	I	[15X QUAS ∆pes-10p GFP]		[mosL loxP 15X QUAS ∆pes-10p GFP-C1 tbb-2 3' FRT3 mosR] I	NM5839	this study	NM5549	RMCE	NMp4358	tctgcgctctatctctacaatgataagagctatcaaaaagttattaactagtaaaatatagacaatttcaagcttaacattttgataattaataacttttttgtatgttaaaccgttaaggagttatgggagattaaaaaagtagtatgcacagagggaggcacttcaattgtatgcgctctgtctcaacaatgataagagctatcaaaaagttattaactgtgaaaatgtagaaaaatttaagtttaacattttgttagtcaataacttttttttattttaacccgttgaggagttatggaagattgaaaaagtagaatgcaccgagggaggtactccaattgtctgcgctcttatctccacgggggtgagagatatcaaaaagttgtcaacggacaa…
Fig. 2, S2	jsSi1894	I	[20X QUAS ∆pes-10p GFP]		[mosL loxP 20X QUAS ∆pes-10p GFP-C1 tbb-2 3' FRT3 mosR] I	NM5836	this study	NM5549	RMCE	NMp4359	tctgcgctctatctctacaatgataagagctatcaaaaagttattaactagtaaaatatagacaatttcaagcttaacattttgataattaataacttttttgtatgttaaaccgttaaggagttatgggagattaaaaaagtagtatgcacagagggaggcacttcaattgtatgcgctctgtctcaacaatgataagagctatcaaaaagttattaactgtgaaaatgtagaaaaatttaagtttaacattttgttagtcaataacttttttttattttaacccgttgaggagttatggaagattgaaaaagtagaatgcaccgagggaggtactccaattgtctgcgctcttatctccacgggggtgagagatatcaaaaagttgtcaacggacaa…
Fig. 2, S2	jsSi1895	I	[18X lexO ∆pes-10p GFP]		[mosL loxP 18X lexO ∆pes-10 GFP-C1 tbb-2 3' FRT3 mosR] I	NM5837	this study	NM5549	RMCE	NMp4364	tctgcgctctatctctacaatgataagagctatcaaaaagttattaactagtaaaatatagacaatttcaagcttaacattttgataattaataacttttttgtatgttaaaccgttaaggagttatgggagattaaaaaagtagtatgcacagagggaggcacttcaattgtatgcgctctgtctcaacaatgataagagctatcaaaaagttattaactgtgaaaatgtagaaaaatttaagtttaacattttgttagtcaataacttttttttattttaacccgttgaggagttatggaagattgaaaaagtagaatgcaccgagggaggtactccaattgtctgcgctcttatctccacgggggtgagagatatcaaaaagttgtcaacggacaa…
Fig. 2, S2	jsSi1897	I	[11X UAS ∆pes-10p GFP]		[loxP UAS 11X ∆pes-10 GFP-C1 tbb-2 3' FRT3 mosR] I	NM5843	this study	NM5322	RMCE	NMp3725	tctgcgctctatctctacaatgataagagctatcaaaaagttattaactagtaaaatatagacaatttcaagcttaacattttgataattaataacttttttgtatgttaaaccgttaaggagttatgggagattaaaaaagtagtatgcacagagggaggcacttcaattgtatgcgctctgtctcaacaatgataagagctatcaaaaagttattaactgtgaaaatgtagaaaaatttaagtttaacattttgttagtcaataacttttttttattttaacccgttgaggagttatggaagattgaaaaagtagaatgcaccgagggaggtactccaattgtctgcgctcttatctccacgggggtgagagatatcaaaaagttgtcaacggacaa…
Fig. 2, S2	jsSi1898	I	[6X UAS ∆pes-10p GFP]	nanoPore Sequenced	[loxP UAS 6X ∆pes-10 GFP-C1 tbb-2 3' FRT3 mosR] I	NM5844	this study	NM5322	RMCE	NMp4356	tctgcgctctatctctacaatgataagagctatcaaaaagttattaactagtaaaatatagacaatttcaagcttaacattttgataattaataacttttttgtatgttaaaccgttaaggagttatgggagattaaaaaagtagtatgcacagagggaggcacttcaattgtatgcgctctgtctcaacaatgataagagctatcaaaaagttattaactgtgaaaatgtagaaaaatttaagtttaacattttgttagtcaataacttttttttattttaacccgttgaggagttatggaagattgaaaaagtagaatgcaccgagggaggtactccaattgtctgcgctcttatctccacgggggtgagagatatcaaaaagttgtcaacggacaa…
Fig. 2, S2	jsSi2193	I	[myo-2p nls-GFP hygR attP 18X lexO mNG]		[loxP myo-2p nls-GFP myo-2 3' <{rps-0p hygR unc-54 3'} <{ori Amp} loxP attP 18X lexO mNG tbb-2 3']	NM6201	this study	NM5549	RMCE	NMp4669	tctgcgctctatctctacaatgataagagctatcaaaaagttattaactagtaaaatatagacaatttcaagcttaacattttgataattaataacttttttgtatgttaaaccgttaaggagttatgggagattaaaaaagtagtatgcacagagggaggcacttcaattgtatgcgctctgtctcaacaatgataagagctatcaaaaagttattaactgtgaaaatgtagaaaaatttaagtttaacattttgttagtcaataacttttttttattttaacccgttgaggagttatggaagattgaaaaagtagaatgcaccgagggaggtactccaattgtctgcgctcttatctccacgggggtgagagatatcaaaaagttgtcaacggacaa…
Fig. 2, S2	jsSi2212	I	[myo-2p nls-GFP hygR attP 6X lexO mNG]		[loxP myo-2p nls-GFP myo-2 3' <{rps-0p hygR unc-54 3'} <{ori Amp} loxP attP 6X lexO mNG tbb-2 3']	NM6227	this study	NM5549	RMCE	NMp4674	tctgcgctctatctctacaatgataagagctatcaaaaagttattaactagtaaaatatagacaatttcaagcttaacattttgataattaataacttttttgtatgttaaaccgttaaggagttatgggagattaaaaaagtagtatgcacagagggaggcacttcaattgtatgcgctctgtctcaacaatgataagagctatcaaaaagttattaactgtgaaaatgtagaaaaatttaagtttaacattttgttagtcaataacttttttttattttaacccgttgaggagttatggaagattgaaaaagtagaatgcaccgagggaggtactccaattgtctgcgctcttatctccacgggggtgagagatatcaaaaagttgtcaacggacaa…
Fig. 2, S2	jsSi2251	I	[myo-2p nls-GFP hygR attP 12X lexO mNG]		[loxP myo-2p FRT nls-GFP myo-2 3' <{rps-0p hygR unc-54 3'} <{ori Amp} loxP attP 12X lexO mNG tbb-2 3' FRT3]	NM6298	this study	NM5549	RMCE	NMp4717	tctgcgctctatctctacaatgataagagctatcaaaaagttattaactagtaaaatatagacaatttcaagcttaacattttgataattaataacttttttgtatgttaaaccgttaaggagttatgggagattaaaaaagtagtatgcacagagggaggcacttcaattgtatgcgctctgtctcaacaatgataagagctatcaaaaagttattaactgtgaaaatgtagaaaaatttaagtttaacattttgttagtcaataacttttttttattttaacccgttgaggagttatggaagattgaaaaagtagaatgcaccgagggaggtactccaattgtctgcgctcttatctccacgggggtgagagatatcaaaaagttgtcaacggacaa…
Fig. 2, S2	met-2(n4256)	III		CGC		MT13293	Andersen & Horvitz, 2007
Fig. 2, S2	set-25(n5021)	III		CGC		MT17463	Andersen & Horvitz, 2007
Fig. 3	jsSi1961	II	[7X tetO 400-R1 ∆mec-7p GFP]		[loxP 7X tetO 400R1 GFP-C1 tbb-2 3' FRT3] II	NM5926	this study	NM5548	RMCE	NMp4421	ATTTCGTGGTTTATATCCTCTGAACTGGTACCTCAAAAACATCGTAGTATTGCTCAATCTGTGGCATATTCAATGAATACTGTAATGGTGGTTATCAGTACATTTACAGTATTACCTCTATATTCCGTTATTGGTAGTTATGCTTTCCTTATTCTATATTCAATTCCTTCATTTATAAGTATGCTTATATTATTTCGCTACTTACCGGAAACCAAAGGACGAGAGATTCATGATATTGTGAATGAACTTAAAAAAAAATGAAAACCTTTGAAAACGTTCATACGGCCGAAATTTTACTTGATCGAGCCAATTGAACTTTTGTTAAGACTTACAGAAAAGTGAGAGATTTTGTTACAAAAAAGTGAGAAAAAAGCGAAAATGAACAGGAAAAAGAAGAAA…
Fig. 3	jsSi1964	II	[7X tetO 900-PATC ∆mec-7p GFP]		[loxP 7X tetO 900 PATC GFP-C1 tbb-2 3' FRT3] II	NM5935	this study	NM5548	RMCE	NMp4424	ATTTCGTGGTTTATATCCTCTGAACTGGTACCTCAAAAACATCGTAGTATTGCTCAATCTGTGGCATATTCAATGAATACTGTAATGGTGGTTATCAGTACATTTACAGTATTACCTCTATATTCCGTTATTGGTAGTTATGCTTTCCTTATTCTATATTCAATTCCTTCATTTATAAGTATGCTTATATTATTTCGCTACTTACCGGAAACCAAAGGACGAGAGATTCATGATATTGTGAATGAACTTAAAAAAAAATGAAAACCTTTGAAAACGTTCATACGGCCGAAATTTTACTTGATCGAGCCAATTGAACTTTTGTTAAGACTTACAGAAAAGTGAGAGATTTTGTTACAAAAAAGTGAGAAAAAAGCGAAAATGAACAGGAAAAAGAAGAAA…
Fig. 3	jsSi2226	II	[7X tetO 400-R2 ∆mec-7p GFP]		[loxP tetO 7X 400-R2 mec-7bp GFP-C1 tbb-2 3' FRT3]	NM6257	this study	NM5548	RMCE	NMp4422	ggctctgcttcttcgttgtaccattttgccttttcttcacacttattcttttcatacttcctgaaactccaaaatttctattaatttcgaaagatgaagaagaagaagctatcaaatctgtaaaatattatcatggagatggtacagatgcaaaacaagttttggaagatattcgaaaagaggcagaatgtgaacaagactcgagcaaatcgacaactttccaaaaaatgaaggaattgtttacagaaagacatttgagaatggcattgatattaagtgtatctgcattaaccaatacTGTCGGATTATGGGCTCTTCTTTTATCCTCTACTTTCTTTCTAGAAAATGCAAATGTTGAGTCAGAAATTGCTGAATGGAGTACAACTGCAATGGGTTTAG…
Fig. 3	jsSi2235	II	[7X tetO 400-R3 ∆mec-7p GFP]		[loxP 7X tetO 400R3 ∆mec-7 GFP-C1 tbb-2 3' FRT3] II	NM6266	this study	NM5548	RMCE	NMp4423	ggctctgcttcttcgttgtaccattttgccttttcttcacacttattcttttcatacttcctgaaactccaaaatttctattaatttcgaaagatgaagaagaagaagctatcaaatctgtaaaatattatcatggagatggtacagatgcaaaacaagttttggaagatattcgaaaagaggcagaatgtgaacaagactcgagcaaatcgacaactttccaaaaaatgaaggaattgtttacagaaagacatttgagaatggcattgatattaagtgtatctgcattaaccaatacTGTCGGATTATGGGCTCTTCTTTTATCCTCTACTTTCTTTCTAGAAAATGCAAATGTTGAGTCAGAAATTGCTGAATGGAGTACAACTGCAATGGGTTTAG…
Fig. 3	jsSi2253	II	[myo-2p nls-mNG hygR 7X tetO 04sp ∆mec-7p GFP-C1]		[loxP myo-2p FRT nls-mNG myo-2 3' <{rps-0p hygR unc-54 3'} <{ori Amp} 7X tetO 04sp ∆mec-7 GFP-C1 tbb-2 3' FRT3] II	NM6302	this study	NM5548	RMCE	NMp4721	ggctctgcttcttcgttgtaccattttgccttttcttcacacttattcttttcatacttcctgaaactccaaaatttctattaatttcgaaagatgaagaagaagaagctatcaaatctgtaaaatattatcatggagatggtacagatgcaaaacaagttttggaagatattcgaaaagaggcagaatgtgaacaagactcgagcaaatcgacaactttccaaaaaatgaaggaattgtttacagaaagacatttgagaatggcattgatattaagtgtatctgcattaaccaatacTGTCGGATTATGGGCTCTTCTTTTATCCTCTACTTTCTTTCTAGAAAATGCAAATGTTGAGTCAGAAATTGCTGAATGGAGTACAACTGCAATGGGTTTAG…
Fig. 3	jsSi2254	II	[myo-2p nls-mNG hygR 7X tetO 13sp ∆mec-7p GFP-C1]		[loxP myo-2p FRT nls-mNG myo-2 3' <{rps-0p hygR unc-54 3'} <{ori Amp} 7X tetO 13sp ∆mec-7 GFP-C1 tbb-2 3' FRT3] II	NM6303	this study	NM5548	RMCE	NMp4731	ggctctgcttcttcgttgtaccattttgccttttcttcacacttattcttttcatacttcctgaaactccaaaatttctattaatttcgaaagatgaagaagaagaagctatcaaatctgtaaaatattatcatggagatggtacagatgcaaaacaagttttggaagatattcgaaaagaggcagaatgtgaacaagactcgagcaaatcgacaactttccaaaaaatgaaggaattgtttacagaaagacatttgagaatggcattgatattaagtgtatctgcattaaccaatacTGTCGGATTATGGGCTCTTCTTTTATCCTCTACTTTCTTTCTAGAAAATGCAAATGTTGAGTCAGAAATTGCTGAATGGAGTACAACTGCAATGGGTTTAG…
Fig. 3	jsSi2256	II	[myo-2p nls-mNG hygR 7X tetO 18sp 13sp ∆mec-7p GFP-C1]		[loxP myo-2p FRT nls-mNG myo-2 3' <{rps-0p hygR unc-54 3'} <{ori Amp} 7X tetO 18sp 13sp ∆mec-7 GFP-C1 tbb-2 3' FRT3] II	NM6305	this study	NM5548	RMCE	NMp4732	ggctctgcttcttcgttgtaccattttgccttttcttcacacttattcttttcatacttcctgaaactccaaaatttctattaatttcgaaagatgaagaagaagaagctatcaaatctgtaaaatattatcatggagatggtacagatgcaaaacaagttttggaagatattcgaaaagaggcagaatgtgaacaagactcgagcaaatcgacaactttccaaaaaatgaaggaattgtttacagaaagacatttgagaatggcattgatattaagtgtatctgcattaaccaatacTGTCGGATTATGGGCTCTTCTTTTATCCTCTACTTTCTTTCTAGAAAATGCAAATGTTGAGTCAGAAATTGCTGAATGGAGTACAACTGCAATGGGTTTAG…
Fig. 3	jsSi2259	II	[myo-2p nls-mNG hygR 7X tetO 18sp 04sp ∆mec-7p GFP-C1]	nanoPore Sequenced	[loxP myo-2p FRT nls-mNG myo-2 3' <{rps-0p hygR unc-54 3'} <{ori Amp} 7X tetO 18sp 04sp ∆mec-7 GFP-C1 tbb-2 3' FRT3] II	NM6311	this study	NM5548	RMCE	NMp4733	ggctctgcttcttcgttgtaccattttgccttttcttcacacttattcttttcatacttcctgaaactccaaaatttctattaatttcgaaagatgaagaagaagaagctatcaaatctgtaaaatattatcatggagatggtacagatgcaaaacaagttttggaagatattcgaaaagaggcagaatgtgaacaagactcgagcaaatcgacaactttccaaaaaatgaaggaattgtttacagaaagacatttgagaatggcattgatattaagtgtatctgcattaaccaatacTGTCGGATTATGGGCTCTTCTTTTATCCTCTACTTTCTTTCTAGAAAATGCAAATGTTGAGTCAGAAATTGCTGAATGGAGTACAACTGCAATGGGTTTAG…
Fig. 3, 5, S4, 6	jsSi1725	II	[nhx-2p tetR-LL-QF]		[loxP rps-17 3' nhx-2p tetR-LL-QF act-4 3' attB FRT3] II	NM5543	this study	NM5402	RMCE	NMp4091	ATTTCGTGGTTTATATCCTCTGAACTGGTACCTCAAAAACATCGTAGTATTGCTCAATCTGTGGCATATTCAATGAATACTGTAATGGTGGTTATCAGTACATTTACAGTATTACCTCTATATTCCGTTATTGGTAGTTATGCTTTCCTTATTCTATATTCAATTCCTTCATTTATAAGTATGCTTATATTATTTCGCTACTTACCGGAAACCAAAGGACGAGAGATTCATGATATTGTGAATGAACTTAAAAAAAAATGAAAACCTTTGAAAACGTTCATACGGCCGAAATTTTACTTGATCGAGCCAATTGAACTTTTGTTAAGACTTACAGAAAAGTGAGAGATTTTGTTACAAAAAAGTGAGAAAAAAGCGAAAATGAACAGGAAAAAGAAGAAA…
Fig. 3, S3	jsSi1762	II	[mec-4synp tetR-L-QF]		[loxP mec-4Sp tetR-L-QF act-4 3' attB FRT3] II	NM5567	this study	NM5402	RMCE	NMp4075	ATTTCGTGGTTTATATCCTCTGAACTGGTACCTCAAAAACATCGTAGTATTGCTCAATCTGTGGCATATTCAATGAATACTGTAATGGTGGTTATCAGTACATTTACAGTATTACCTCTATATTCCGTTATTGGTAGTTATGCTTTCCTTATTCTATATTCAATTCCTTCATTTATAAGTATGCTTATATTATTTCGCTACTTACCGGAAACCAAAGGACGAGAGATTCATGATATTGTGAATGAACTTAAAAAAAAATGAAAACCTTTGAAAACGTTCATACGGCCGAAATTTTACTTGATCGAGCCAATTGAACTTTTGTTAAGACTTACAGAAAAGTGAGAGATTTTGTTACAAAAAAGTGAGAAAAAAGCGAAAATGAACAGGAAAAAGAAGAAA…
Fig. 3, S3	jsSi2180	I	[myo-2p nls-scarlet hygR 4X tetOA ∆mec-7p mNG]		[loxP myo-2p nls-scarlet myo-2 3' <{rps-0p hygR unc-54 3'} <{ori Amp} loxP 4X tetO ∆mec-7pmNG tbb-2 3' FRT3]	NM6179	this study	NM5549	RMCE	NMp4651	tctgcgctctatctctacaatgataagagctatcaaaaagttattaactagtaaaatatagacaatttcaagcttaacattttgataattaataacttttttgtatgttaaaccgttaaggagttatgggagattaaaaaagtagtatgcacagagggaggcacttcaattgtatgcgctctgtctcaacaatgataagagctatcaaaaagttattaactgtgaaaatgtagaaaaatttaagtttaacattttgttagtcaataacttttttttattttaacccgttgaggagttatggaagattgaaaaagtagaatgcaccgagggaggtactccaattgtctgcgctcttatctccacgggggtgagagatatcaaaaagttgtcaacggacaa…
Fig. 3, S3	jsSi2185	I	[myo-2p nls-scarlet hygR 4X tetOD ∆mec-7p mNG]		[loxP myo-2p nls-scarlet myo-2 3' <{rps-0p hygR unc-54 3'} <[ori Amp} loxP 4X tetO ∆mec-7p mNG tbb-2 3' FRT3]	NM6188	this study	NM5549	RMCE	NMp4652	tctgcgctctatctctacaatgataagagctatcaaaaagttattaactagtaaaatatagacaatttcaagcttaacattttgataattaataacttttttgtatgttaaaccgttaaggagttatgggagattaaaaaagtagtatgcacagagggaggcacttcaattgtatgcgctctgtctcaacaatgataagagctatcaaaaagttattaactgtgaaaatgtagaaaaatttaagtttaacattttgttagtcaataacttttttttattttaacccgttgaggagttatggaagattgaaaaagtagaatgcaccgagggaggtactccaattgtctgcgctcttatctccacgggggtgagagatatcaaaaagttgtcaacggacaa…
Fig. 3, S3	jsSi2194	I	[myo-2p nls-scarlet hygR 4X tetOC ∆mec-7p mNG]		[loxP myo-2p nls-scarlet myo-2 3' <{rps-0p hygR unc-54 3'} <{ori Amp} loxP 4X tetOC ∆mec-7p mNG tbb-2 3' FRT3]	NM6203	this study	NM5549	RMCE	NMp4658	tctgcgctctatctctacaatgataagagctatcaaaaagttattaactagtaaaatatagacaatttcaagcttaacattttgataattaataacttttttgtatgttaaaccgttaaggagttatgggagattaaaaaagtagtatgcacagagggaggcacttcaattgtatgcgctctgtctcaacaatgataagagctatcaaaaagttattaactgtgaaaatgtagaaaaatttaagtttaacattttgttagtcaataacttttttttattttaacccgttgaggagttatggaagattgaaaaagtagaatgcaccgagggaggtactccaattgtctgcgctcttatctccacgggggtgagagatatcaaaaagttgtcaacggacaa…
Fig. 3, S3	jsSi2201	I	[myo-2p nls-scarlet hygR 4X tetOB ∆mec-7p mNG]		[loxP myo-2p nls-scarlet myo-2 3' <{rps-0p hygR unc-54 3'} <{ori Amp} loxP 4X tetOB ∆mec-7p mNG tbb-2 3' FRT3]	NM6202	this study	NM5549	RMCE	NMp4657	tctgcgctctatctctacaatgataagagctatcaaaaagttattaactagtaaaatatagacaatttcaagcttaacattttgataattaataacttttttgtatgttaaaccgttaaggagttatgggagattaaaaaagtagtatgcacagagggaggcacttcaattgtatgcgctctgtctcaacaatgataagagctatcaaaaagttattaactgtgaaaatgtagaaaaatttaagtttaacattttgttagtcaataacttttttttattttaacccgttgaggagttatggaagattgaaaaagtagaatgcaccgagggaggtactccaattgtctgcgctcttatctccacgggggtgagagatatcaaaaagttgtcaacggacaa…
Fig. 3, S3	jsSi2348	II	[myo-2p nls-GFP hygR attP 13X-40 tetO ∆mec-7pmNG]		[loxP myo-2p nls-GFP myo-2 3' <{rps-0p hygR unc-54 3'} <{ori Amp} loxP attP rps-7 3' 13X-40 tetO ∆mec-7p mNG tbb-2 3' FRT3]	NM6407	this study	NM5548	RMCE	NMp4878	ggctctgcttcttcgttgtaccattttgccttttcttcacacttattcttttcatacttcctgaaactccaaaatttctattaatttcgaaagatgaagaagaagaagctatcaaatctgtaaaatattatcatggagatggtacagatgcaaaacaagttttggaagatattcgaaaagaggcagaatgtgaacaagactcgagcaaatcgacaactttccaaaaaatgaaggaattgtttacagaaagacatttgagaatggcattgatattaagtgtatctgcattaaccaatacTGTCGGATTATGGGCTCTTCTTTTATCCTCTACTTTCTTTCTAGAAAATGCAAATGTTGAGTCAGAAATTGCTGAATGGAGTACAACTGCAATGGGTTTAG…
Fig. 3, S3	jsSi2372	II	[myo-2p nls-GFP hygR attP 13X-37 tetO ∆mec-7p mNG]		[loxP myo-2p nls-GFP myo-2 3' <{rps-0p hygR unc-54 3'} <{ori Amp} loxP attP rps-7 3' 13X-37 tetO ∆mec-7p mNG tbb-2 3' FRT3]	NM6432	this study	NM5548	RMCE	NMp4877	ggctctgcttcttcgttgtaccattttgccttttcttcacacttattcttttcatacttcctgaaactccaaaatttctattaatttcgaaagatgaagaagaagaagctatcaaatctgtaaaatattatcatggagatggtacagatgcaaaacaagttttggaagatattcgaaaagaggcagaatgtgaacaagactcgagcaaatcgacaactttccaaaaaatgaaggaattgtttacagaaagacatttgagaatggcattgatattaagtgtatctgcattaaccaatacTGTCGGATTATGGGCTCTTCTTTTATCCTCTACTTTCTTTCTAGAAAATGCAAATGTTGAGTCAGAAATTGCTGAATGGAGTACAACTGCAATGGGTTTAG…
Fig. 3, S3	jsSi2374	II	[myo-2p nls-GFP hygR attP 13X-43 tetO ∆mec-7p mNG]		[loxP myo-2p nls-GFP myo-2 3' <{rps-0p hygR unc-54 3'} <{ori Amp} loxP attP rps-7 3' 13X-43 tetO ∆mec-7p mNG tbb-2 3' FRT3]	NM6433	this study	NM5548	RMCE	NMp4881	ggctctgcttcttcgttgtaccattttgccttttcttcacacttattcttttcatacttcctgaaactccaaaatttctattaatttcgaaagatgaagaagaagaagctatcaaatctgtaaaatattatcatggagatggtacagatgcaaaacaagttttggaagatattcgaaaagaggcagaatgtgaacaagactcgagcaaatcgacaactttccaaaaaatgaaggaattgtttacagaaagacatttgagaatggcattgatattaagtgtatctgcattaaccaatacTGTCGGATTATGGGCTCTTCTTTTATCCTCTACTTTCTTTCTAGAAAATGCAAATGTTGAGTCAGAAATTGCTGAATGGAGTACAACTGCAATGGGTTTAG…
Fig. 3, S3	jsSi2388	II	[myo-2p nls-GFP hygR attP 13X-33 tetO ∆mec-7p mNG]		[loxP myo-2p nls-GFP myo-2 3' <{rps-0p hygR unc-54 3'} <{ori Amp} loxP attP 13X-33 tetO mNG ∆mec-7p tbb-2 3' FRT3]	NM6450	this study	NM5548	RMCE	NMp4876	ggctctgcttcttcgttgtaccattttgccttttcttcacacttattcttttcatacttcctgaaactccaaaatttctattaatttcgaaagatgaagaagaagaagctatcaaatctgtaaaatattatcatggagatggtacagatgcaaaacaagttttggaagatattcgaaaagaggcagaatgtgaacaagactcgagcaaatcgacaactttccaaaaaatgaaggaattgtttacagaaagacatttgagaatggcattgatattaagtgtatctgcattaaccaatacTGTCGGATTATGGGCTCTTCTTTTATCCTCTACTTTCTTTCTAGAAAATGCAAATGTTGAGTCAGAAATTGCTGAATGGAGTACAACTGCAATGGGTTTAG…
Fig. 3, S3, 6, S6	jsSi1678	I	[mec-4Sp tetR-L-QF]		[loxP rps-17 3' mec-4Sp tetR-L-QF act-4 attB FRT3] I	NM5497	this study	NM5161	RMCE	NMp4086	tctgcgctctatctctacaatgataagagctatcaaaaagttattaactagtaaaatatagacaatttcaagcttaacattttgataattaataacttttttgtatgttaaaccgttaaggagttatgggagattaaaaaagtagtatgcacagagggaggcacttcaattgtatgcgctctgtctcaacaatgataagagctatcaaaaagttattaactgtgaaaatgtagaaaaatttaagtttaacattttgttagtcaataacttttttttattttaacccgttgaggagttatggaagattgaaaaagtagaatgcaccgagggaggtactccaattgtctgcgctcttatctccacgggggtgagagatatcaaaaagttgtcaacggacaa…
Fig. 4, 5, 6, S4, S5	jsSi1670	II	[mec-4synp tetR-L-QF]		[loxP rps-17 3' mec-4Sp tetR-L-QF act-4 3' attB FRT3] II	NM5475	this study	NM5402	RMCE	NMp4086	ATTTCGTGGTTTATATCCTCTGAACTGGTACCTCAAAAACATCGTAGTATTGCTCAATCTGTGGCATATTCAATGAATACTGTAATGGTGGTTATCAGTACATTTACAGTATTACCTCTATATTCCGTTATTGGTAGTTATGCTTTCCTTATTCTATATTCAATTCCTTCATTTATAAGTATGCTTATATTATTTCGCTACTTACCGGAAACCAAAGGACGAGAGATTCATGATATTGTGAATGAACTTAAAAAAAAATGAAAACCTTTGAAAACGTTCATACGGCCGAAATTTTACTTGATCGAGCCAATTGAACTTTTGTTAAGACTTACAGAAAAGTGAGAGATTTTGTTACAAAAAAGTGAGAAAAAAGCGAAAATGAACAGGAAAAAGAAGAAA…
Fig. 4, S4	jsSi1680	II	[ehs-1p tetR-LL-QF]		[loxP rps-17 3' ehs-1p tetR-LL-QF act-4 3' attB FRT3] II	NM5531	this study	NM5402	RMCE	NMp4090	ATTTCGTGGTTTATATCCTCTGAACTGGTACCTCAAAAACATCGTAGTATTGCTCAATCTGTGGCATATTCAATGAATACTGTAATGGTGGTTATCAGTACATTTACAGTATTACCTCTATATTCCGTTATTGGTAGTTATGCTTTCCTTATTCTATATTCAATTCCTTCATTTATAAGTATGCTTATATTATTTCGCTACTTACCGGAAACCAAAGGACGAGAGATTCATGATATTGTGAATGAACTTAAAAAAAAATGAAAACCTTTGAAAACGTTCATACGGCCGAAATTTTACTTGATCGAGCCAATTGAACTTTTGTTAAGACTTACAGAAAAGTGAGAGATTTTGTTACAAAAAAGTGAGAAAAAAGCGAAAATGAACAGGAAAAAGAAGAAA…
Fig. 4, S4	jsSi1682	II	[cup-4p tetR-LL-QF]		[loxP rps-17 3' cup-4p tetR-LL-QF act-4 3' attB FRT3] II	NM5509	this study	NM5402	RMCE	NMp4092	ATTTCGTGGTTTATATCCTCTGAACTGGTACCTCAAAAACATCGTAGTATTGCTCAATCTGTGGCATATTCAATGAATACTGTAATGGTGGTTATCAGTACATTTACAGTATTACCTCTATATTCCGTTATTGGTAGTTATGCTTTCCTTATTCTATATTCAATTCCTTCATTTATAAGTATGCTTATATTATTTCGCTACTTACCGGAAACCAAAGGACGAGAGATTCATGATATTGTGAATGAACTTAAAAAAAAATGAAAACCTTTGAAAACGTTCATACGGCCGAAATTTTACTTGATCGAGCCAATTGAACTTTTGTTAAGACTTACAGAAAAGTGAGAGATTTTGTTACAAAAAAGTGAGAAAAAAGCGAAAATGAACAGGAAAAAGAAGAAA…
Fig. 4, S4	jsSi1683	II	[myo-2p tetR-LL-QF]		[loxP rps-17 3' myo-2p tetR-LL-QF act-4 3' attB FRT3] II	NM5532	this study	NM5402	RMCE	NMp4093	ATTTCGTGGTTTATATCCTCTGAACTGGTACCTCAAAAACATCGTAGTATTGCTCAATCTGTGGCATATTCAATGAATACTGTAATGGTGGTTATCAGTACATTTACAGTATTACCTCTATATTCCGTTATTGGTAGTTATGCTTTCCTTATTCTATATTCAATTCCTTCATTTATAAGTATGCTTATATTATTTCGCTACTTACCGGAAACCAAAGGACGAGAGATTCATGATATTGTGAATGAACTTAAAAAAAAATGAAAACCTTTGAAAACGTTCATACGGCCGAAATTTTACTTGATCGAGCCAATTGAACTTTTGTTAAGACTTACAGAAAAGTGAGAGATTTTGTTACAAAAAAGTGAGAAAAAAGCGAAAATGAACAGGAAAAAGAAGAAA…
Fig. 4, S4	jsSi1685	II	[dpy-7p tetR-LL-QF]		[loxP rps-17 3' dpy-7p tetR-LL-QF act-4 3' attB FRT3] II	NM5533	this study	NM5402	RMCE	NMp4094	ATTTCGTGGTTTATATCCTCTGAACTGGTACCTCAAAAACATCGTAGTATTGCTCAATCTGTGGCATATTCAATGAATACTGTAATGGTGGTTATCAGTACATTTACAGTATTACCTCTATATTCCGTTATTGGTAGTTATGCTTTCCTTATTCTATATTCAATTCCTTCATTTATAAGTATGCTTATATTATTTCGCTACTTACCGGAAACCAAAGGACGAGAGATTCATGATATTGTGAATGAACTTAAAAAAAAATGAAAACCTTTGAAAACGTTCATACGGCCGAAATTTTACTTGATCGAGCCAATTGAACTTTTGTTAAGACTTACAGAAAAGTGAGAGATTTTGTTACAAAAAAGTGAGAAAAAAGCGAAAATGAACAGGAAAAAGAAGAAA…
Fig. 4, S4	jsSi1696	II	[myo-3p tetR-LL-QF]		[loxP rps-17 3' myo-3p tetR-LL-QF act-4 3' attB FRT3] II	NM5537	this study	NM5402	RMCE	NMp4107	ATTTCGTGGTTTATATCCTCTGAACTGGTACCTCAAAAACATCGTAGTATTGCTCAATCTGTGGCATATTCAATGAATACTGTAATGGTGGTTATCAGTACATTTACAGTATTACCTCTATATTCCGTTATTGGTAGTTATGCTTTCCTTATTCTATATTCAATTCCTTCATTTATAAGTATGCTTATATTATTTCGCTACTTACCGGAAACCAAAGGACGAGAGATTCATGATATTGTGAATGAACTTAAAAAAAAATGAAAACCTTTGAAAACGTTCATACGGCCGAAATTTTACTTGATCGAGCCAATTGAACTTTTGTTAAGACTTACAGAAAAGTGAGAGATTTTGTTACAAAAAAGTGAGAAAAAAGCGAAAATGAACAGGAAAAAGAAGAAA…
Fig. 4, S4	jsSi1720	II	[vha-6p tetR-LL-QF]		[loxP rps-17 3' vha-6p tetR-LL-QF act-4 3' attB FRT3] II	NM5587	this study	NM5402	RMCE	NMp4161	ATTTCGTGGTTTATATCCTCTGAACTGGTACCTCAAAAACATCGTAGTATTGCTCAATCTGTGGCATATTCAATGAATACTGTAATGGTGGTTATCAGTACATTTACAGTATTACCTCTATATTCCGTTATTGGTAGTTATGCTTTCCTTATTCTATATTCAATTCCTTCATTTATAAGTATGCTTATATTATTTCGCTACTTACCGGAAACCAAAGGACGAGAGATTCATGATATTGTGAATGAACTTAAAAAAAAATGAAAACCTTTGAAAACGTTCATACGGCCGAAATTTTACTTGATCGAGCCAATTGAACTTTTGTTAAGACTTACAGAAAAGTGAGAGATTTTGTTACAAAAAAGTGAGAAAAAAGCGAAAATGAACAGGAAAAAGAAGAAA…
Fig. 5, S5	jsSi1729	II	[7X tetO ∆pes-10p ∆mec-7p GFP]		[loxP 7X tetO ∆pes-10p ∆mec-7p GFP-C1 tbb-2 3' FRT3] II	NM5631	this study	NM5402	RMCE	NMp4173	ATTTCGTGGTTTATATCCTCTGAACTGGTACCTCAAAAACATCGTAGTATTGCTCAATCTGTGGCATATTCAATGAATACTGTAATGGTGGTTATCAGTACATTTACAGTATTACCTCTATATTCCGTTATTGGTAGTTATGCTTTCCTTATTCTATATTCAATTCCTTCATTTATAAGTATGCTTATATTATTTCGCTACTTACCGGAAACCAAAGGACGAGAGATTCATGATATTGTGAATGAACTTAAAAAAAAATGAAAACCTTTGAAAACGTTCATACGGCCGAAATTTTACTTGATCGAGCCAATTGAACTTTTGTTAAGACTTACAGAAAAGTGAGAGATTTTGTTACAAAAAAGTGAGAAAAAAGCGAAAATGAACAGGAAAAAGAAGAAA…
Fig. 5, S5	jsSi2266	II	[7X tetO ∆act-4p GFP]		[loxP 7X tetO ∆act-4p GFP-C1 tbb-2 3' FRT3] II	NM6309	this study	NM6012	Cre Excision		ggctctgcttcttcgttgtaccattttgccttttcttcacacttattcttttcatacttcctgaaactccaaaatttctattaatttcgaaagatgaagaagaagaagctatcaaatctgtaaaatattatcatggagatggtacagatgcaaaacaagttttggaagatattcgaaaagaggcagaatgtgaacaagactcgagcaaatcgacaactttccaaaaaatgaaggaattgtttacagaaagacatttgagaatggcattgatattaagtgtatctgcattaaccaatacTGTCGGATTATGGGCTCTTCTTTTATCCTCTACTTTCTTTCTAGAAAATGCAAATGTTGAGTCAGAAATTGCTGAATGGAGTACAACTGCAATGGGTTTAG…
Fig. 5, S5	jsSi2279	II	[7X tetO ∆lys-8p GFP]		[loxP 7X tetO ∆lys-8p GFP-C1 tbb-2 3' FRT3] II	NM6650	this study	NM5995	Cre Excision		tctgcgctctatctctacaatgataagagctatcaaaaagttattaactagtaaaatatagacaatttcaagcttaacattttgataattaataacttttttgtatgttaaaccgttaaggagttatgggagattaaaaaagtagtatgcacagagggaggcacttcaattgtatgcgctctgtctcaacaatgataagagctatcaaaaagttattaactgtgaaaatgtagaaaaatttaagtttaacattttgttagtcaataacttttttttattttaacccgttgaggagttatggaagattgaaaaagtagaatgcaccgagggaggtactccaattgtctgcgctcttatctccacgggggtgagagatatcaaaaagttgtcaacggacaa…
Fig. 5, S5	jsSi2280	II	[7X tetO ∆tbb-2p GFP]		[loxP 7X tetO ∆tbb-2p GFP-C1 tbb-2 3' FRT3] II	NM6529	this study	NM5984	Cre Excision		ggctctgcttcttcgttgtaccattttgccttttcttcacacttattcttttcatacttcctgaaactccaaaatttctattaatttcgaaagatgaagaagaagaagctatcaaatctgtaaaatattatcatggagatggtacagatgcaaaacaagttttggaagatattcgaaaagaggcagaatgtgaacaagactcgagcaaatcgacaactttccaaaaaatgaaggaattgtttacagaaagacatttgagaatggcattgatattaagtgtatctgcattaaccaatacTGTCGGATTATGGGCTCTTCTTTTATCCTCTACTTTCTTTCTAGAAAATGCAAATGTTGAGTCAGAAATTGCTGAATGGAGTACAACTGCAATGGGTTTAG…
Fig. 5, S5	jsSi2325	II	[myo-2p nls-scarlet hygR 7X tetO ∆act-4p2 GFP]		[loxP myo-2p FRT nls-scarlet myo-2 3' <{rps-0p hygR unc-54 3'} <{ori Amp} loxP 7X tetO ∆act-4p2 tbb-2 3' FRT3] II	NM6383	this study	NM5548	RMCE	NMp4828	ggctctgcttcttcgttgtaccattttgccttttcttcacacttattcttttcatacttcctgaaactccaaaatttctattaatttcgaaagatgaagaagaagaagctatcaaatctgtaaaatattatcatggagatggtacagatgcaaaacaagttttggaagatattcgaaaagaggcagaatgtgaacaagactcgagcaaatcgacaactttccaaaaaatgaaggaattgtttacagaaagacatttgagaatggcattgatattaagtgtatctgcattaaccaatacTGTCGGATTATGGGCTCTTCTTTTATCCTCTACTTTCTTTCTAGAAAATGCAAATGTTGAGTCAGAAATTGCTGAATGGAGTACAACTGCAATGGGTTTAG…
Fig. 5, S5	jsSi2326	II	[myo-2p nls-scarlet hygR 7X tetO ∆act-4p4 GFP]		[loxP myo-2p FRT nls-scarlet myo-2 3' <{rps-0p hygR unc-54 3'} <{ori Amp} loxP 7X tetO ∆act-4p4 GFP tbb-2 3' FRT3] II	NM6384	this study	NM5548	RMCE	NMp4830	ggctctgcttcttcgttgtaccattttgccttttcttcacacttattcttttcatacttcctgaaactccaaaatttctattaatttcgaaagatgaagaagaagaagctatcaaatctgtaaaatattatcatggagatggtacagatgcaaaacaagttttggaagatattcgaaaagaggcagaatgtgaacaagactcgagcaaatcgacaactttccaaaaaatgaaggaattgtttacagaaagacatttgagaatggcattgatattaagtgtatctgcattaaccaatacTGTCGGATTATGGGCTCTTCTTTTATCCTCTACTTTCTTTCTAGAAAATGCAAATGTTGAGTCAGAAATTGCTGAATGGAGTACAACTGCAATGGGTTTAG…
Fig. 5, S5	jsSi2331	II	[myo-2p nls-scarlet hygR 7X tetO ∆act-4p3 GFP]		[loxP myo-2p FRT nls-scarlet myo-2 3' <{rps-0p hygR unc-54 3'} <{ori Amp} loxP 7X tetO ∆act-4p3 GFP tbb-2 3' FRT3] II	NM6392	this study	NM5548	RMCE	NMp4829	ggctctgcttcttcgttgtaccattttgccttttcttcacacttattcttttcatacttcctgaaactccaaaatttctattaatttcgaaagatgaagaagaagaagctatcaaatctgtaaaatattatcatggagatggtacagatgcaaaacaagttttggaagatattcgaaaagaggcagaatgtgaacaagactcgagcaaatcgacaactttccaaaaaatgaaggaattgtttacagaaagacatttgagaatggcattgatattaagtgtatctgcattaaccaatacTGTCGGATTATGGGCTCTTCTTTTATCCTCTACTTTCTTTCTAGAAAATGCAAATGTTGAGTCAGAAATTGCTGAATGGAGTACAACTGCAATGGGTTTAG…
Fig. 5, S5	jsSi2339	II	[myo-2p nls-scarlet hygR 7X tetO ∆tbb-2p2 GFP]		[loxP myo-2p FRT nls-scarlet myo-2 3' <{rps-0p hygR unc-54 3'} <{ori Amp} loxP 7X tetO ∆tbb-2p2 GFP tbb-2 3' FRT3] II	NM6398	this study	NM5548	RMCE	NMp4831	ggctctgcttcttcgttgtaccattttgccttttcttcacacttattcttttcatacttcctgaaactccaaaatttctattaatttcgaaagatgaagaagaagaagctatcaaatctgtaaaatattatcatggagatggtacagatgcaaaacaagttttggaagatattcgaaaagaggcagaatgtgaacaagactcgagcaaatcgacaactttccaaaaaatgaaggaattgtttacagaaagacatttgagaatggcattgatattaagtgtatctgcattaaccaatacTGTCGGATTATGGGCTCTTCTTTTATCCTCTACTTTCTTTCTAGAAAATGCAAATGTTGAGTCAGAAATTGCTGAATGGAGTACAACTGCAATGGGTTTAG…
Fig. 5, S5	jsSi2342	II	[myo-2p nls-scarlet hygR 7X tetO ∆lys-8p2 GFP]		[loxP myo-2p nls-scarlet myo-2 3' <{rps-0p hygR unc-54 3'} <{ori Amp} loxP 7X tetO ∆lys-8p2 GFP tbb-2 3'FRT3] II	NM6400	this study	NM5548	RMCE	NMp4832	ggctctgcttcttcgttgtaccattttgccttttcttcacacttattcttttcatacttcctgaaactccaaaatttctattaatttcgaaagatgaagaagaagaagctatcaaatctgtaaaatattatcatggagatggtacagatgcaaaacaagttttggaagatattcgaaaagaggcagaatgtgaacaagactcgagcaaatcgacaactttccaaaaaatgaaggaattgtttacagaaagacatttgagaatggcattgatattaagtgtatctgcattaaccaatacTGTCGGATTATGGGCTCTTCTTTTATCCTCTACTTTCTTTCTAGAAAATGCAAATGTTGAGTCAGAAATTGCTGAATGGAGTACAACTGCAATGGGTTTAG…
Fig. 5, S5	jsSi2344	II	[myo-2p nls-scarlet hygR 7X tetO ∆act-4p GFP]		[loxP myo-2p nls-scarlet myo-2 3' <{rps-0p hygR unc-54 3'} <{ori Amp} loxP 7X tetO ∆act-4p GFP let-858 3' FRT3] II	NM6408	this study	NM5548	RMCE	NMp4833	ggctctgcttcttcgttgtaccattttgccttttcttcacacttattcttttcatacttcctgaaactccaaaatttctattaatttcgaaagatgaagaagaagaagctatcaaatctgtaaaatattatcatggagatggtacagatgcaaaacaagttttggaagatattcgaaaagaggcagaatgtgaacaagactcgagcaaatcgacaactttccaaaaaatgaaggaattgtttacagaaagacatttgagaatggcattgatattaagtgtatctgcattaaccaatacTGTCGGATTATGGGCTCTTCTTTTATCCTCTACTTTCTTTCTAGAAAATGCAAATGTTGAGTCAGAAATTGCTGAATGGAGTACAACTGCAATGGGTTTAG…
Fig. 5, S5	jsSi2440	II	[7X tetO ∆lys-8p2 GFP]		[loxP 7X tetO ∆lys-8p2 GFP tbb-2 3' FRT3] II	NM6526	this study	NM6400	Cre Excision		ggctctgcttcttcgttgtaccattttgccttttcttcacacttattcttttcatacttcctgaaactccaaaatttctattaatttcgaaagatgaagaagaagaagctatcaaatctgtaaaatattatcatggagatggtacagatgcaaaacaagttttggaagatattcgaaaagaggcagaatgtgaacaagactcgagcaaatcgacaactttccaaaaaatgaaggaattgtttacagaaagacatttgagaatggcattgatattaagtgtatctgcattaaccaatacTGTCGGATTATGGGCTCTTCTTTTATCCTCTACTTTCTTTCTAGAAAATGCAAATGTTGAGTCAGAAATTGCTGAATGGAGTACAACTGCAATGGGTTTAG…
Fig. 5, S5	jsSi2441	II	[7X tetO ∆act-4p4 GFP]		[loxP 7X tetO ∆act-4p4 GFP tbb-2 3' FRT3] II	NM6527	this study	NM6384	Cre Excision		ggctctgcttcttcgttgtaccattttgccttttcttcacacttattcttttcatacttcctgaaactccaaaatttctattaatttcgaaagatgaagaagaagaagctatcaaatctgtaaaatattatcatggagatggtacagatgcaaaacaagttttggaagatattcgaaaagaggcagaatgtgaacaagactcgagcaaatcgacaactttccaaaaaatgaaggaattgtttacagaaagacatttgagaatggcattgatattaagtgtatctgcattaaccaatacTGTCGGATTATGGGCTCTTCTTTTATCCTCTACTTTCTTTCTAGAAAATGCAAATGTTGAGTCAGAAATTGCTGAATGGAGTACAACTGCAATGGGTTTAG…
Fig. 5, S5	jsSi2447	II	[7X tetO ∆pes-10p GFP]		[loxP 7X tetO ∆pes-10p GFP-C1 tbb-2 3' FRT3] II	NM6543	this study	NM6523	Cre Excision		ggctctgcttcttcgttgtaccattttgccttttcttcacacttattcttttcatacttcctgaaactccaaaatttctattaatttcgaaagatgaagaagaagaagctatcaaatctgtaaaatattatcatggagatggtacagatgcaaaacaagttttggaagatattcgaaaagaggcagaatgtgaacaagactcgagcaaatcgacaactttccaaaaaatgaaggaattgtttacagaaagacatttgagaatggcattgatattaagtgtatctgcattaaccaatacTGTCGGATTATGGGCTCTTCTTTTATCCTCTACTTTCTTTCTAGAAAATGCAAATGTTGAGTCAGAAATTGCTGAATGGAGTACAACTGCAATGGGTTTAG…
Fig. 6	jsSi2292	II	[myo-2p nls-GFP hygR attP nls-scarlet 7X tetO ∆mec-7p nls-GFP]		[loxP myo-2p FRT nls-GFP myo-2 3' <{rps-0p hygR unc-54 3'} <{ori Amp} loxP attP <{nls-scarlet tbb-2} 7X tetO ∆mec-7p nls-GFP let-858 3' FRT3]	NM6347	this study	NM5548	RMCE	NMp4782	ggctctgcttcttcgttgtaccattttgccttttcttcacacttattcttttcatacttcctgaaactccaaaatttctattaatttcgaaagatgaagaagaagaagctatcaaatctgtaaaatattatcatggagatggtacagatgcaaaacaagttttggaagatattcgaaaagaggcagaatgtgaacaagactcgagcaaatcgacaactttccaaaaaatgaaggaattgtttacagaaagacatttgagaatggcattgatattaagtgtatctgcattaaccaatacTGTCGGATTATGGGCTCTTCTTTTATCCTCTACTTTCTTTCTAGAAAATGCAAATGTTGAGTCAGAAATTGCTGAATGGAGTACAACTGCAATGGGTTTAG…
Fig. 6, S6	jsSi1958	II	[7X tetO ∆p200-1 GFP]		[loxP attP 7X tetO ∆p200-1 GFP-C1 tbb-2 3' FRT3]	NM5933	this study	NM5548	RMCE	NMp4391	ATTTCGTGGTTTATATCCTCTGAACTGGTACCTCAAAAACATCGTAGTATTGCTCAATCTGTGGCATATTCAATGAATACTGTAATGGTGGTTATCAGTACATTTACAGTATTACCTCTATATTCCGTTATTGGTAGTTATGCTTTCCTTATTCTATATTCAATTCCTTCATTTATAAGTATGCTTATATTATTTCGCTACTTACCGGAAACCAAAGGACGAGAGATTCATGATATTGTGAATGAACTTAAAAAAAAATGAAAACCTTTGAAAACGTTCATACGGCCGAAATTTTACTTGATCGAGCCAATTGAACTTTTGTTAAGACTTACAGAAAAGTGAGAGATTTTGTTACAAAAAAGTGAGAAAAAAGCGAAAATGAACAGGAAAAAGAAGAAA…
Fig. 6, S6	jsSi1959	II	[7X tetO ∆p200-2 GFP]		[loxP attP 7X tetO ∆p200-2 GFP-C1 tbb-2 3' FRT3]	NM5924	this study	NM5548	RMCE	NMp4392	ATTTCGTGGTTTATATCCTCTGAACTGGTACCTCAAAAACATCGTAGTATTGCTCAATCTGTGGCATATTCAATGAATACTGTAATGGTGGTTATCAGTACATTTACAGTATTACCTCTATATTCCGTTATTGGTAGTTATGCTTTCCTTATTCTATATTCAATTCCTTCATTTATAAGTATGCTTATATTATTTCGCTACTTACCGGAAACCAAAGGACGAGAGATTCATGATATTGTGAATGAACTTAAAAAAAAATGAAAACCTTTGAAAACGTTCATACGGCCGAAATTTTACTTGATCGAGCCAATTGAACTTTTGTTAAGACTTACAGAAAAGTGAGAGATTTTGTTACAAAAAAGTGAGAAAAAAGCGAAAATGAACAGGAAAAAGAAGAAA…
Fig. 6, S6	jsSi1960	II	[7X tetO ∆p200-3 GFP]		[loxP attP 7X tetO ∆p200-3 GFP-C1 tbb-2 3' FRT3]	NM5925	this study	NM5548	RMCE	NMp4393	ATTTCGTGGTTTATATCCTCTGAACTGGTACCTCAAAAACATCGTAGTATTGCTCAATCTGTGGCATATTCAATGAATACTGTAATGGTGGTTATCAGTACATTTACAGTATTACCTCTATATTCCGTTATTGGTAGTTATGCTTTCCTTATTCTATATTCAATTCCTTCATTTATAAGTATGCTTATATTATTTCGCTACTTACCGGAAACCAAAGGACGAGAGATTCATGATATTGTGAATGAACTTAAAAAAAAATGAAAACCTTTGAAAACGTTCATACGGCCGAAATTTTACTTGATCGAGCCAATTGAACTTTTGTTAAGACTTACAGAAAAGTGAGAGATTTTGTTACAAAAAAGTGAGAAAAAAGCGAAAATGAACAGGAAAAAGAAGAAA…
Fig. 6, S6	jsSi1961	II	[7X tetO 400-R1 GFP]		[loxP 7X tetO 400-R1 GFP-C1 tbb-2 3' FRT3]	NM5926	this study	NM5548	RMCE	NMp4421	ATTTCGTGGTTTATATCCTCTGAACTGGTACCTCAAAAACATCGTAGTATTGCTCAATCTGTGGCATATTCAATGAATACTGTAATGGTGGTTATCAGTACATTTACAGTATTACCTCTATATTCCGTTATTGGTAGTTATGCTTTCCTTATTCTATATTCAATTCCTTCATTTATAAGTATGCTTATATTATTTCGCTACTTACCGGAAACCAAAGGACGAGAGATTCATGATATTGTGAATGAACTTAAAAAAAAATGAAAACCTTTGAAAACGTTCATACGGCCGAAATTTTACTTGATCGAGCCAATTGAACTTTTGTTAAGACTTACAGAAAAGTGAGAGATTTTGTTACAAAAAAGTGAGAAAAAAGCGAAAATGAACAGGAAAAAGAAGAAA…
Fig. 6, S6	jsSi2497	II	[myo-2p nls-scarlet hygR 7X tetO 7X Kozak GFP]		[loxP myo-2p nls-scarlet myo-2 3' <{rps-0p hygR unc-54 3'} <{ori Amp} loxP attP tetO 7X Kozak GFP tbb-2 3' FRT3]	NM6636	this study	NM5548	RMCE	NMp5034	ggctctgcttcttcgttgtaccattttgccttttcttcacacttattcttttcatacttcctgaaactccaaaatttctattaatttcgaaagatgaagaagaagaagctatcaaatctgtaaaatattatcatggagatggtacagatgcaaaacaagttttggaagatattcgaaaagaggcagaatgtgaacaagactcgagcaaatcgacaactttccaaaaaatgaaggaattgtttacagaaagacatttgagaatggcattgatattaagtgtatctgcattaaccaatacTGTCGGATTATGGGCTCTTCTTTTATCCTCTACTTTCTTTCTAGAAAATGCAAATGTTGAGTCAGAAATTGCTGAATGGAGTACAACTGCAATGGGTTTAG…
Fig. 6, S6	jsSi2504	II	[myo-2p nls-scarlet hygR 7X tetO 7X sl Kozak GFP]		[loxP myo-2p nls-scarlet myo-2 3' <{rps-0p hygR unc-54 3'} <{ori Amp} loxP attP tetO 7X sl Kozak GFP tbb-2 3' FRT3]	NM6645	this study	NM5548	RMCE	NMp5035	ggctctgcttcttcgttgtaccattttgccttttcttcacacttattcttttcatacttcctgaaactccaaaatttctattaatttcgaaagatgaagaagaagaagctatcaaatctgtaaaatattatcatggagatggtacagatgcaaaacaagttttggaagatattcgaaaagaggcagaatgtgaacaagactcgagcaaatcgacaactttccaaaaaatgaaggaattgtttacagaaagacatttgagaatggcattgatattaagtgtatctgcattaaccaatacTGTCGGATTATGGGCTCTTCTTTTATCCTCTACTTTCTTTCTAGAAAATGCAAATGTTGAGTCAGAAATTGCTGAATGGAGTACAACTGCAATGGGTTTAG…
Fig. 7	jsSi2321	II	[cup-4p nls-scarlet hygR R400 let-858 3' ∆mec-7p nls-GFP]		[loxP cup-4p FRT nls-scarlet myo-2 3' <{rps-0p hygR unc-54 3'} <{ori Amp} loxP let-858 3' ∆mec-7 nls-GFP let-858 3' FRT3]	NM6381	this study	NM5879	RMCE	NMp4812	ATTTCGTGGTTTATATCCTCTGAACTGGTACCTCAAAAACATCGTAGTATTGCTCAATCTGTGGCATATTCAATGAATACTGTAATGGTGGTTATCAGTACATTTACAGTATTACCTCTATATTCCGTTATTGGTAGTTATGCTTTCCTTATTCTATATTCAATTCCTTCATTTATAAGTATGCTTATATTATTTCGCTACTTACCGGAAACCAAAGGACGAGAGATTCATGATATTGTGAATGAACTTAAAAAAAAATGAAAACCTTTGAAAACGTTCATACGGCCGAAATTTTACTTGATCGAGCCAATTGAACTTTTGTTAAGACTTACAGAAAAGTGAGAGATTTTGTTACAAAAAAGTGAGAAAAAAGCGAAAATGAACAGGAAAAAGAAGAAA…
Fig. 7	jsSi2329	II	[myo-2p nls-GFP hygR 7X tetO ∆mec-7p scarlet unc-54 3' sl2 mNG]		[loxP myo-2p FRT nls-GFP myo-2 3' <{rps-0p hygR unc-54 3'} <{ori Amp} loxP 7X tetO ∆mec-7p scarlet unc-54 3' sl2 mNG glh-2 3' FRT3] II	NM6390	this study	NM5548	RMCE	NMp4839	ggctctgcttcttcgttgtaccattttgccttttcttcacacttattcttttcatacttcctgaaactccaaaatttctattaatttcgaaagatgaagaagaagaagctatcaaatctgtaaaatattatcatggagatggtacagatgcaaaacaagttttggaagatattcgaaaagaggcagaatgtgaacaagactcgagcaaatcgacaactttccaaaaaatgaaggaattgtttacagaaagacatttgagaatggcattgatattaagtgtatctgcattaaccaatacTGTCGGATTATGGGCTCTTCTTTTATCCTCTACTTTCTTTCTAGAAAATGCAAATGTTGAGTCAGAAATTGCTGAATGGAGTACAACTGCAATGGGTTTAG…
Fig. 7	jsSi2332	II	[myo-2p nls-GFP hygR 7X tetO ∆pes-10p scarlet unc-54 3' sl2 mNG]		[loxP myo-2p FRT nls-GFP myo-2 3' <{rps-0p hygR unc-54 3'} <{ori Amp} loxP 7X tetO ∆pes-10p scarlet unc-54 3' sl2 mNG glh-2 3' FRT3] II	NM6395	this study	NM5548	RMCE	NMp4842	ggctctgcttcttcgttgtaccattttgccttttcttcacacttattcttttcatacttcctgaaactccaaaatttctattaatttcgaaagatgaagaagaagaagctatcaaatctgtaaaatattatcatggagatggtacagatgcaaaacaagttttggaagatattcgaaaagaggcagaatgtgaacaagactcgagcaaatcgacaactttccaaaaaatgaaggaattgtttacagaaagacatttgagaatggcattgatattaagtgtatctgcattaaccaatacTGTCGGATTATGGGCTCTTCTTTTATCCTCTACTTTCTTTCTAGAAAATGCAAATGTTGAGTCAGAAATTGCTGAATGGAGTACAACTGCAATGGGTTTAG…
Fig. 7	jsSi2334	II	[myo-2p nls-GFP hygR 7X tetO ∆pes-10p scarlet let-858 3' sl2 mNG]		[loxP myo-2p FRT nls-GFP myo-2 3' <{rps-0p hygR unc-54 3'} <{ori Amp} loxP 7X tetO ∆pes-10p scarlet let-858 3' sl2 mNG glh-2 3' FRT3] II	NM6393	this study	NM5548	RMCE	NMp4843	ggctctgcttcttcgttgtaccattttgccttttcttcacacttattcttttcatacttcctgaaactccaaaatttctattaatttcgaaagatgaagaagaagaagctatcaaatctgtaaaatattatcatggagatggtacagatgcaaaacaagttttggaagatattcgaaaagaggcagaatgtgaacaagactcgagcaaatcgacaactttccaaaaaatgaaggaattgtttacagaaagacatttgagaatggcattgatattaagtgtatctgcattaaccaatacTGTCGGATTATGGGCTCTTCTTTTATCCTCTACTTTCTTTCTAGAAAATGCAAATGTTGAGTCAGAAATTGCTGAATGGAGTACAACTGCAATGGGTTTAG…
Fig. 7	jsSi2338	II	[myo-2p nls-GFP hygR 7X tetO ∆mec-7p scarlet let-858 3' sl2 mNG]		[loxP myo-2p FRT nls-GFP myo-2 3' <{rps-0p hygR unc-54 3'} <{ori Amp} loxP 7X tetO ∆mec-7p scarlet let-858 3' sl2 mNG glh-2 3' FRT3] II	NM6397	this study	NM5548	RMCE	NMp4840	ggctctgcttcttcgttgtaccattttgccttttcttcacacttattcttttcatacttcctgaaactccaaaatttctattaatttcgaaagatgaagaagaagaagctatcaaatctgtaaaatattatcatggagatggtacagatgcaaaacaagttttggaagatattcgaaaagaggcagaatgtgaacaagactcgagcaaatcgacaactttccaaaaaatgaaggaattgtttacagaaagacatttgagaatggcattgatattaagtgtatctgcattaaccaatacTGTCGGATTATGGGCTCTTCTTTTATCCTCTACTTTCTTTCTAGAAAATGCAAATGTTGAGTCAGAAATTGCTGAATGGAGTACAACTGCAATGGGTTTAG…
Fig. 7	jsSi2369	II	[cup-4p nls-scarlet hygR R400 glh-2 3' ∆mec-7p nls-GFP]		[loxP cup-4p nls-scarlet myo-2 3' <{rps-0p hygR unc-54 3'} <{ori Amp} loxP R400 glh-2 3' ∆mec-7 nls-GFP let-858 3' FRT3] II	NM6438	this study	NM5879	RMCE	NMp4894	ATTTCGTGGTTTATATCCTCTGAACTGGTACCTCAAAAACATCGTAGTATTGCTCAATCTGTGGCATATTCAATGAATACTGTAATGGTGGTTATCAGTACATTTACAGTATTACCTCTATATTCCGTTATTGGTAGTTATGCTTTCCTTATTCTATATTCAATTCCTTCATTTATAAGTATGCTTATATTATTTCGCTACTTACCGGAAACCAAAGGACGAGAGATTCATGATATTGTGAATGAACTTAAAAAAAAATGAAAACCTTTGAAAACGTTCATACGGCCGAAATTTTACTTGATCGAGCCAATTGAACTTTTGTTAAGACTTACAGAAAAGTGAGAGATTTTGTTACAAAAAAGTGAGAAAAAAGCGAAAATGAACAGGAAAAAGAAGAAA…
Fig. 7	jsSi2370	II	[cup-4p nls-scarlet hygR R400 rps-9 3' ∆mec-7p nls-GFP]		[loxP cup-4p nls-scarlet myo-2 3' <{rps-0p hygR unc-54 3'} <{ori Amp} loxP R400 rps-9 3' ∆mec-7 nls-GFP let-858 3' FRT3] II	NM6441	this study	NM5879	RMCE	NMp4898	ATTTCGTGGTTTATATCCTCTGAACTGGTACCTCAAAAACATCGTAGTATTGCTCAATCTGTGGCATATTCAATGAATACTGTAATGGTGGTTATCAGTACATTTACAGTATTACCTCTATATTCCGTTATTGGTAGTTATGCTTTCCTTATTCTATATTCAATTCCTTCATTTATAAGTATGCTTATATTATTTCGCTACTTACCGGAAACCAAAGGACGAGAGATTCATGATATTGTGAATGAACTTAAAAAAAAATGAAAACCTTTGAAAACGTTCATACGGCCGAAATTTTACTTGATCGAGCCAATTGAACTTTTGTTAAGACTTACAGAAAAGTGAGAGATTTTGTTACAAAAAAGTGAGAAAAAAGCGAAAATGAACAGGAAAAAGAAGAAA…
Fig. 7	jsSi2373	II	[cup-4p nls-scarlet hygR R400 ubl-1 3' ∆mec-7p nls-GFP]		[loxP cup-4p nls-scarlet myo-2 3' <{rps-0p hygR unc-54 3'} <{ori Amp} loxP R400 ubl-1 3' ∆mec-7 nls-GFP let-858 3' FRT3] II	NM6439	this study	NM5879	RMCE	NMp4896	ATTTCGTGGTTTATATCCTCTGAACTGGTACCTCAAAAACATCGTAGTATTGCTCAATCTGTGGCATATTCAATGAATACTGTAATGGTGGTTATCAGTACATTTACAGTATTACCTCTATATTCCGTTATTGGTAGTTATGCTTTCCTTATTCTATATTCAATTCCTTCATTTATAAGTATGCTTATATTATTTCGCTACTTACCGGAAACCAAAGGACGAGAGATTCATGATATTGTGAATGAACTTAAAAAAAAATGAAAACCTTTGAAAACGTTCATACGGCCGAAATTTTACTTGATCGAGCCAATTGAACTTTTGTTAAGACTTACAGAAAAGTGAGAGATTTTGTTACAAAAAAGTGAGAAAAAAGCGAAAATGAACAGGAAAAAGAAGAAA…
Fig. 7	jsSi2376	II	[cup-4p nls-scarlet hygR R400 eef-2 3' ∆mec-7p nls-GFP]		[loxP cup-4p nls-scarlet myo-2 3' <{rps-0p hygR unc-54 3'} <{ori Amp} loxP R400 eef-2 3' ∆mec-7 nls-GFP let-858 3' FRT3]	NM6443	this study	NM5879	RMCE	NMp4899	ATTTCGTGGTTTATATCCTCTGAACTGGTACCTCAAAAACATCGTAGTATTGCTCAATCTGTGGCATATTCAATGAATACTGTAATGGTGGTTATCAGTACATTTACAGTATTACCTCTATATTCCGTTATTGGTAGTTATGCTTTCCTTATTCTATATTCAATTCCTTCATTTATAAGTATGCTTATATTATTTCGCTACTTACCGGAAACCAAAGGACGAGAGATTCATGATATTGTGAATGAACTTAAAAAAAAATGAAAACCTTTGAAAACGTTCATACGGCCGAAATTTTACTTGATCGAGCCAATTGAACTTTTGTTAAGACTTACAGAAAAGTGAGAGATTTTGTTACAAAAAAGTGAGAAAAAAGCGAAAATGAACAGGAAAAAGAAGAAA…
Fig. 7	jsSi2380	II	[cup-4p nls-scarlet hygR R400 ter222 ∆mec-7p nls-GFP]		[loxP cup-4p nls-scarlet myo-2 3' <{rps-0p hygR unc-54 3'} <{ori Amp} loxP R400 ter222 ∆mec-7 nls-GFP let-858 3' FRT3] II	NM6436	this study	NM5879	RMCE	NMp4900	ATTTCGTGGTTTATATCCTCTGAACTGGTACCTCAAAAACATCGTAGTATTGCTCAATCTGTGGCATATTCAATGAATACTGTAATGGTGGTTATCAGTACATTTACAGTATTACCTCTATATTCCGTTATTGGTAGTTATGCTTTCCTTATTCTATATTCAATTCCTTCATTTATAAGTATGCTTATATTATTTCGCTACTTACCGGAAACCAAAGGACGAGAGATTCATGATATTGTGAATGAACTTAAAAAAAAATGAAAACCTTTGAAAACGTTCATACGGCCGAAATTTTACTTGATCGAGCCAATTGAACTTTTGTTAAGACTTACAGAAAAGTGAGAGATTTTGTTACAAAAAAGTGAGAAAAAAGCGAAAATGAACAGGAAAAAGAAGAAA…
Fig. 7	jsSi2384	II	[myo-2p nls-GFP hygR 7X tetO ∆mec-7p scarlet tbb-2 3' sl2 mNG]		[loxP myo-2p nls-GFP myo-2 3' <{rps-0p hygR unc-54 3'} <{ori Amp} loxP 7X tetO ∆mec-7p scarlet tbb-2 3' sl2 mNG glh-2 3'] II	NM6447	this study	NM5548	RMCE	NMp4841	ggctctgcttcttcgttgtaccattttgccttttcttcacacttattcttttcatacttcctgaaactccaaaatttctattaatttcgaaagatgaagaagaagaagctatcaaatctgtaaaatattatcatggagatggtacagatgcaaaacaagttttggaagatattcgaaaagaggcagaatgtgaacaagactcgagcaaatcgacaactttccaaaaaatgaaggaattgtttacagaaagacatttgagaatggcattgatattaagtgtatctgcattaaccaatacTGTCGGATTATGGGCTCTTCTTTTATCCTCTACTTTCTTTCTAGAAAATGCAAATGTTGAGTCAGAAATTGCTGAATGGAGTACAACTGCAATGGGTTTAG…
Fig. 7	jsSi2396	II	[myo-2p nls-GFP hygR 7X tetO ∆pes-10p scarlet rps-0 3' gpd2 mNG]		[loxP myo-2p nls-GFP myo-2 3' <{rps-0p hygR unc-54 3'} <{ori Amp} loxP 7X tetO ∆pes-10p scarlet rps-0 3' gpd2 mNG glh-2 3'] II	NM6482	this study	NM5548	RMCE	NMp4938	ggctctgcttcttcgttgtaccattttgccttttcttcacacttattcttttcatacttcctgaaactccaaaatttctattaatttcgaaagatgaagaagaagaagctatcaaatctgtaaaatattatcatggagatggtacagatgcaaaacaagttttggaagatattcgaaaagaggcagaatgtgaacaagactcgagcaaatcgacaactttccaaaaaatgaaggaattgtttacagaaagacatttgagaatggcattgatattaagtgtatctgcattaaccaatacTGTCGGATTATGGGCTCTTCTTTTATCCTCTACTTTCTTTCTAGAAAATGCAAATGTTGAGTCAGAAATTGCTGAATGGAGTACAACTGCAATGGGTTTAG…
Fig. 7	jsSi2407	II	[myo-2p nls-GFP rps-0 hygR 7X tetO ∆pes-10p glh-2 3' Scarlet gpd-2 sl2 mNG]		[loxP myo-2p FRT nls-GFP-C1 myo-2 3' <{rps-0p hygR unc-54 3'} ori <{Amp} loxP 7X tetO ∆pes-10p glh-2 3' scarlet gpd-2 sl2 mNG glh-2 3' FRT3] II	NM6490	this study	NM5548	RMCE	NMp4939	ggctctgcttcttcgttgtaccattttgccttttcttcacacttattcttttcatacttcctgaaactccaaaatttctattaatttcgaaagatgaagaagaagaagctatcaaatctgtaaaatattatcatggagatggtacagatgcaaaacaagttttggaagatattcgaaaagaggcagaatgtgaacaagactcgagcaaatcgacaactttccaaaaaatgaaggaattgtttacagaaagacatttgagaatggcattgatattaagtgtatctgcattaaccaatacTGTCGGATTATGGGCTCTTCTTTTATCCTCTACTTTCTTTCTAGAAAATGCAAATGTTGAGTCAGAAATTGCTGAATGGAGTACAACTGCAATGGGTTTAG…
Fig. 7	jsSi2413	II	[myo-2p nls-GFP hygR 7X tetO ∆pes-10p scarlet act-4 3' gpd2 mNG]		[loxP myo-2p FRT nls-GFP myo-2 3' <{rps-0p hygR unc-54 3'} <{ori Amp} loxP 7X tetO ∆pes-10p scarlet act-4 3' gpd2 mNG glh-2 3' FRT3] II	NM6505	this study	NM5548	RMCE	NMp4953	ggctctgcttcttcgttgtaccattttgccttttcttcacacttattcttttcatacttcctgaaactccaaaatttctattaatttcgaaagatgaagaagaagaagctatcaaatctgtaaaatattatcatggagatggtacagatgcaaaacaagttttggaagatattcgaaaagaggcagaatgtgaacaagactcgagcaaatcgacaactttccaaaaaatgaaggaattgtttacagaaagacatttgagaatggcattgatattaagtgtatctgcattaaccaatacTGTCGGATTATGGGCTCTTCTTTTATCCTCTACTTTCTTTCTAGAAAATGCAAATGTTGAGTCAGAAATTGCTGAATGGAGTACAACTGCAATGGGTTTAG…
Fig. 7	jsSi2416	II	[myo-2p nls-GFP hygR 7X tetO ∆pes-10p scarlet rps-9 3' gpd2 mNG]		[loxP myo-2p FRT nls-GFP myo-2 3' <{rps-0p hygR unc-54 3'} <{ori Amp} loxP 7X tetO ∆pes-10p scarlet rps-9 3' gpd2 mNG glh-2 3' FRT3] II	NM6509	this study	NM5548	RMCE	NMp4954	ggctctgcttcttcgttgtaccattttgccttttcttcacacttattcttttcatacttcctgaaactccaaaatttctattaatttcgaaagatgaagaagaagaagctatcaaatctgtaaaatattatcatggagatggtacagatgcaaaacaagttttggaagatattcgaaaagaggcagaatgtgaacaagactcgagcaaatcgacaactttccaaaaaatgaaggaattgtttacagaaagacatttgagaatggcattgatattaagtgtatctgcattaaccaatacTGTCGGATTATGGGCTCTTCTTTTATCCTCTACTTTCTTTCTAGAAAATGCAAATGTTGAGTCAGAAATTGCTGAATGGAGTACAACTGCAATGGGTTTAG…
Fig. 7	jsSi2424	II	[myo-2p nls-GFP hygR 7X tetO ∆pes-10p scarlet ter-222 3' gpd2 mNG]		[loxP myo-2p FRT nls-GFP myo-2 3' <{rps-0p hygR unc-54 3'} <{ori Amp} loxP 7X tetO ∆pes-10 scarlet ter-222 3' gpd2 mNG glh-2 3' FRT3] II	NM6525	this study	NM5548	RMCE	NMp4955	ggctctgcttcttcgttgtaccattttgccttttcttcacacttattcttttcatacttcctgaaactccaaaatttctattaatttcgaaagatgaagaagaagaagctatcaaatctgtaaaatattatcatggagatggtacagatgcaaaacaagttttggaagatattcgaaaagaggcagaatgtgaacaagactcgagcaaatcgacaactttccaaaaaatgaaggaattgtttacagaaagacatttgagaatggcattgatattaagtgtatctgcattaaccaatacTGTCGGATTATGGGCTCTTCTTTTATCCTCTACTTTCTTTCTAGAAAATGCAAATGTTGAGTCAGAAATTGCTGAATGGAGTACAACTGCAATGGGTTTAG…
Fig. 7	jsSi2425	II	[myo-2p nls-GFP hygR 7X tetO ∆pes-10p scarlet ubl-1 3' gpd2 mNG]		[loxP myo-2p FRT nls-GFP myo-2 3' <{rps-0p hygR unc-54 3'} <{ori Amp} loxP 7X tetO ∆pes-10p scarlet ubl-1 3' gpd2 mNG glh-2 3' FRT3] II	NM6522	this study	NM5548	RMCE	NMp4956	ggctctgcttcttcgttgtaccattttgccttttcttcacacttattcttttcatacttcctgaaactccaaaatttctattaatttcgaaagatgaagaagaagaagctatcaaatctgtaaaatattatcatggagatggtacagatgcaaaacaagttttggaagatattcgaaaagaggcagaatgtgaacaagactcgagcaaatcgacaactttccaaaaaatgaaggaattgtttacagaaagacatttgagaatggcattgatattaagtgtatctgcattaaccaatacTGTCGGATTATGGGCTCTTCTTTTATCCTCTACTTTCTTTCTAGAAAATGCAAATGTTGAGTCAGAAATTGCTGAATGGAGTACAACTGCAATGGGTTTAG…
Fig. 7	jsSi2475	II	[myo-2p nls-GFP hygR 7X tetO ∆pes-10p scarlet eef-2 3' gpd2 mNG]		[loxP myo-2p FRT nls-GFP myo-2 3' <{rps-0p hygR unc-54 3'} <{ori Amp} loxP 7X tetO ∆pes-10p scarlet eef-2 3' gpd2 mNG glh-2 3' FRT3] II	NM6591	this study	NM5548	RMCE	NMp4952	ggctctgcttcttcgttgtaccattttgccttttcttcacacttattcttttcatacttcctgaaactccaaaatttctattaatttcgaaagatgaagaagaagaagctatcaaatctgtaaaatattatcatggagatggtacagatgcaaaacaagttttggaagatattcgaaaagaggcagaatgtgaacaagactcgagcaaatcgacaactttccaaaaaatgaaggaattgtttacagaaagacatttgagaatggcattgatattaagtgtatctgcattaaccaatacTGTCGGATTATGGGCTCTTCTTTTATCCTCTACTTTCTTTCTAGAAAATGCAAATGTTGAGTCAGAAATTGCTGAATGGAGTACAACTGCAATGGGTTTAG…
Fig. 7	jsSi2612	II	[cup-4p nls-scarlet hygR ∆mec-7 nls-GFP]		[loxP cup-4p FRT nls-scarlet myo-2 3' <{rps-0p hygR unc-54 3'} <{ori Amp} loxP ∆mec-7 nls-GFP let-858 3']	NM6801	this study	NM5879	RMCE	NMp4756	ATTTCGTGGTTTATATCCTCTGAACTGGTACCTCAAAAACATCGTAGTATTGCTCAATCTGTGGCATATTCAATGAATACTGTAATGGTGGTTATCAGTACATTTACAGTATTACCTCTATATTCCGTTATTGGTAGTTATGCTTTCCTTATTCTATATTCAATTCCTTCATTTATAAGTATGCTTATATTATTTCGCTACTTACCGGAAACCAAAGGACGAGAGATTCATGATATTGTGAATGAACTTAAAAAAAAATGAAAACCTTTGAAAACGTTCATACGGCCGAAATTTTACTTGATCGAGCCAATTGAACTTTTGTTAAGACTTACAGAAAAGTGAGAGATTTTGTTACAAAAAAGTGAGAAAAAAGCGAAAATGAACAGGAAAAAGAAGAAA…
Fig. 7	jsSi2312	II	[tbb-2 3' ∆mec-7p nls-GFP]		[loxP tbb-2 3' ∆mec-7 nls-GFP let-858 3' FRT3] II	NM6366	this study	NM6331	Cre Excision		ggctctgcttcttcgttgtaccattttgccttttcttcacacttattcttttcatacttcctgaaactccaaaatttctattaatttcgaaagatgaagaagaagaagctatcaaatctgtaaaatattatcatggagatggtacagatgcaaaacaagttttggaagatattcgaaaagaggcagaatgtgaacaagactcgagcaaatcgacaactttccaaaaaatgaaggaattgtttacagaaagacatttgagaatggcattgatattaagtgtatctgcattaaccaatacTGTCGGATTATGGGCTCTTCTTTTATCCTCTACTTTCTTTCTAGAAAATGCAAATGTTGAGTCAGAAATTGCTGAATGGAGTACAACTGCAATGGGTTTAG…
Fig. S3	jsSi2269	I	[myo-2p nls-GFP hygR 13X lexO mec-7bp mNG attB]		[loxP myo-2p FRT nls-GFP myo-2 3' <{rps-0p hygR unc-54 3'} <{ori Amp} loxP 13X lexO mec-7bp mNG tbb-2 3' attB FRT3]	NM6325	this study	NM5549	RMCE	NMp4754	tctgcgctctatctctacaatgataagagctatcaaaaagttattaactagtaaaatatagacaatttcaagcttaacattttgataattaataacttttttgtatgttaaaccgttaaggagttatgggagattaaaaaagtagtatgcacagagggaggcacttcaattgtatgcgctctgtctcaacaatgataagagctatcaaaaagttattaactgtgaaaatgtagaaaaatttaagtttaacattttgttagtcaataacttttttttattttaacccgttgaggagttatggaagattgaaaaagtagaatgcaccgagggaggtactccaattgtctgcgctcttatctccacgggggtgagagatatcaaaaagttgtcaacggacaa…
Fig. S3	jsSi2270	I	[myo-2p nls-GFP hygR QUAS 13X mec-7bp mNG attB]		[loxP myo-2p FRT nls-GFP myo-2 3' <{rps-0p hygR unc-54 3'} <{ori Amp} loxP QUAS 13X mec-7bp mNG tbb-2 3' attB FRT3]	NM6326	this study	NM5549	RMCE	NMp4755	tctgcgctctatctctacaatgataagagctatcaaaaagttattaactagtaaaatatagacaatttcaagcttaacattttgataattaataacttttttgtatgttaaaccgttaaggagttatgggagattaaaaaagtagtatgcacagagggaggcacttcaattgtatgcgctctgtctcaacaatgataagagctatcaaaaagttattaactgtgaaaatgtagaaaaatttaagtttaacattttgttagtcaataacttttttttattttaacccgttgaggagttatggaagattgaaaaagtagaatgcaccgagggaggtactccaattgtctgcgctcttatctccacgggggtgagagatatcaaaaagttgtcaacggacaa…
Fig. S4	jsSi1601	II	[phat-5p tetR-L-QF act-4 3’UTR]		[loxP phat-5p tetR-L-QF act-4 3’UTR FRT13 FRT3]	NM5789	this study	NM5402	RMCE	NMp3917	TGTCGGATTATGGGCTCTTCTTTTATCCTCTACTTTCTTTCTAGAAAATGCAAATGTTGAGTCAGAAATTGCTGAATGGAGTACAACTGCAATGGGTTTAGCTTATGTTTCTGGAACAATTACTGGTGGAATTGTGATTGAAAAGTAAGGTTATATTTCATTTCAATAAATGTTACCACAGTATAACAAAAACAAGTTACATTGTTCAGAGTATGTCTGAATGTATTATTATTATTGTATTTGTGCATCAGTACTGTAGTTGTACTGAAGAAGGGTTTAAAATAATCTCAACGTTTTTAAGACGAGTTAGTGAGAATACGGTCGCAGTTAGGATGTTTGGACATAGTTTTATTAGATAATCGTGAACTAACTCACTATAAAAACCCGCTAACTCATTGA…
for Fig. 5	jsSi2000	II	[myo-2 nls-Scarlet hygR 7X tetO ∆pals-5 GFP]		[loxP myo-2p FRT nls-scarlet myo-2 3' rps-0p hygR unc-54 3' ori <{Amp} loxP 7X tetO ∆pals-5 GFP-C1 tbb-2 3' FRT3] II	NM5973	this study	NM5548	RMCE	NMp4488	ggctctgcttcttcgttgtaccattttgccttttcttcacacttattcttttcatacttcctgaaactccaaaatttctattaatttcgaaagatgaagaagaagaagctatcaaatctgtaaaatattatcatggagatggtacagatgcaaaacaagttttggaagatattcgaaaagaggcagaatgtgaacaagactcgagcaaatcgacaactttccaaaaaatgaaggaattgtttacagaaagacatttgagaatggcattgatattaagtgtatctgcattaaccaatacTGTCGGATTATGGGCTCTTCTTTTATCCTCTACTTTCTTTCTAGAAAATGCAAATGTTGAGTCAGAAATTGCTGAATGGAGTACAACTGCAATGGGTTTAG…
Fig. S5	jsSi2267	II	[tetO 7X ∆pals-5p GFP]		[loxP tetO 7X ∆pals-5p GFP-C1 tbb-2 3' FRT3]	NM6310	this study	NM5973	Cre Excision		ggctctgcttcttcgttgtaccattttgccttttcttcacacttattcttttcatacttcctgaaactccaaaatttctattaatttcgaaagatgaagaagaagaagctatcaaatctgtaaaatattatcatggagatggtacagatgcaaaacaagttttggaagatattcgaaaagaggcagaatgtgaacaagactcgagcaaatcgacaactttccaaaaaatgaaggaattgtttacagaaagacatttgagaatggcattgatattaagtgtatctgcattaaccaatacTGTCGGATTATGGGCTCTTCTTTTATCCTCTACTTTCTTTCTAGAAAATGCAAATGTTGAGTCAGAAATTGCTGAATGGAGTACAACTGCAATGGGTTTAG…
Fig. S7	jsSi2313	II	[myo-2p nls-scarlet hygR R400 unc-54 3' ∆mec-7p nls-GFP]		[loxP myo-2p FRT nls-scarlet myo-2 3' <{rps-0p hygR unc-54 3'} <{ori Amp} loxP R400 unc-54 3' ∆mec-7 nls-GFP let-858 3' FRT3] II	NM6370	this study	NM5548	RMCE	NMp4809	ggctctgcttcttcgttgtaccattttgccttttcttcacacttattcttttcatacttcctgaaactccaaaatttctattaatttcgaaagatgaagaagaagaagctatcaaatctgtaaaatattatcatggagatggtacagatgcaaaacaagttttggaagatattcgaaaagaggcagaatgtgaacaagactcgagcaaatcgacaactttccaaaaaatgaaggaattgtttacagaaagacatttgagaatggcattgatattaagtgtatctgcattaaccaatacTGTCGGATTATGGGCTCTTCTTTTATCCTCTACTTTCTTTCTAGAAAATGCAAATGTTGAGTCAGAAATTGCTGAATGGAGTACAACTGCAATGGGTTTAG…
Fig. S7	jsSi2319	II	[cup-4p nls-scarlet hygR R400 act-4 3' ∆mec-7p nls-GFP]		[loxP cup-4p FRT nls-scarlet myo-2 3' <{rps-0p hygR unc-54 3'} <{ori Amp} loxP R400 act-4 3' ∆mec-7 nls-GFP let-858 3' FRT3] II	NM6377	this study	NM5879	RMCE	NMp4810	ATTTCGTGGTTTATATCCTCTGAACTGGTACCTCAAAAACATCGTAGTATTGCTCAATCTGTGGCATATTCAATGAATACTGTAATGGTGGTTATCAGTACATTTACAGTATTACCTCTATATTCCGTTATTGGTAGTTATGCTTTCCTTATTCTATATTCAATTCCTTCATTTATAAGTATGCTTATATTATTTCGCTACTTACCGGAAACCAAAGGACGAGAGATTCATGATATTGTGAATGAACTTAAAAAAAAATGAAAACCTTTGAAAACGTTCATACGGCCGAAATTTTACTTGATCGAGCCAATTGAACTTTTGTTAAGACTTACAGAAAAGTGAGAGATTTTGTTACAAAAAAGTGAGAAAAAAGCGAAAATGAACAGGAAAAAGAAGAAA…
Fig. S7	jsSi2320	II	[cup-4p nls-scarlet hygR R400 rps-2 3' ∆mec-7p nls-GFP]		[loxP cup-4p FRT nls-scarlet myo-2 3' <{rps-0p hygR unc-54 3'} <{ori Amp} loxP R400 rps-2 3' ∆mec-7 nls-GFP let-858 3' FRT3] II	NM6378	this study	NM5879	RMCE	NMp4811	ATTTCGTGGTTTATATCCTCTGAACTGGTACCTCAAAAACATCGTAGTATTGCTCAATCTGTGGCATATTCAATGAATACTGTAATGGTGGTTATCAGTACATTTACAGTATTACCTCTATATTCCGTTATTGGTAGTTATGCTTTCCTTATTCTATATTCAATTCCTTCATTTATAAGTATGCTTATATTATTTCGCTACTTACCGGAAACCAAAGGACGAGAGATTCATGATATTGTGAATGAACTTAAAAAAAAATGAAAACCTTTGAAAACGTTCATACGGCCGAAATTTTACTTGATCGAGCCAATTGAACTTTTGTTAAGACTTACAGAAAAGTGAGAGATTTTGTTACAAAAAAGTGAGAAAAAAGCGAAAATGAACAGGAAAAAGAAGAAA…
Fig. S7	jsSi2323	II	[cup-4p nls-scarlet hygR R400 tbb-2 3' ∆mec-7p nls-GFP]		[loxP cup-4p FRT nls-scarlet myo-2 3' <{rps-0p hygR unc-54 3'} <{ori Amp} loxP R400 tbb-2 3' ∆mec-7 nls-GFP let-858 3' FRT3] II	NM6386	this study	NM5879	RMCE	NMp4825	ATTTCGTGGTTTATATCCTCTGAACTGGTACCTCAAAAACATCGTAGTATTGCTCAATCTGTGGCATATTCAATGAATACTGTAATGGTGGTTATCAGTACATTTACAGTATTACCTCTATATTCCGTTATTGGTAGTTATGCTTTCCTTATTCTATATTCAATTCCTTCATTTATAAGTATGCTTATATTATTTCGCTACTTACCGGAAACCAAAGGACGAGAGATTCATGATATTGTGAATGAACTTAAAAAAAAATGAAAACCTTTGAAAACGTTCATACGGCCGAAATTTTACTTGATCGAGCCAATTGAACTTTTGTTAAGACTTACAGAAAAGTGAGAGATTTTGTTACAAAAAAGTGAGAAAAAAGCGAAAATGAACAGGAAAAAGAAGAAA…
Fig. S7	jsSi2345	II	[myo-2p nls-scarlet hygR R400 QFAD ∆mec-7p nls-GFP]		[loxP myo-2p nls-scarlet myo-2 3' <{rps-0p hygR unc-54 3'} <{ori Amp} loxP R400 QFAD ∆mec-7 nls-GFP let-858 3'] II	NM6410	this study	NM5548	RMCE	NMp4864	ggctctgcttcttcgttgtaccattttgccttttcttcacacttattcttttcatacttcctgaaactccaaaatttctattaatttcgaaagatgaagaagaagaagctatcaaatctgtaaaatattatcatggagatggtacagatgcaaaacaagttttggaagatattcgaaaagaggcagaatgtgaacaagactcgagcaaatcgacaactttccaaaaaatgaaggaattgtttacagaaagacatttgagaatggcattgatattaagtgtatctgcattaaccaatacTGTCGGATTATGGGCTCTTCTTTTATCCTCTACTTTCTTTCTAGAAAATGCAAATGTTGAGTCAGAAATTGCTGAATGGAGTACAACTGCAATGGGTTTAG…
Fig. S7	jsSi2352	II	[cup-4p nls-scarlet hygR R400 rps-0 3' ∆mec-7p nls-GFP]		[loxP cup-4p nls-scarlet myo-2 3' <{rps-0p hygR unc-54 3'} <{ori Amp} loxP R400 rps-0 3' ∆mec-7 nls-GFP let-858 3' FRT3] II	NM6413	this study	NM5879	RMCE	NMp4892	ATTTCGTGGTTTATATCCTCTGAACTGGTACCTCAAAAACATCGTAGTATTGCTCAATCTGTGGCATATTCAATGAATACTGTAATGGTGGTTATCAGTACATTTACAGTATTACCTCTATATTCCGTTATTGGTAGTTATGCTTTCCTTATTCTATATTCAATTCCTTCATTTATAAGTATGCTTATATTATTTCGCTACTTACCGGAAACCAAAGGACGAGAGATTCATGATATTGTGAATGAACTTAAAAAAAAATGAAAACCTTTGAAAACGTTCATACGGCCGAAATTTTACTTGATCGAGCCAATTGAACTTTTGTTAAGACTTACAGAAAAGTGAGAGATTTTGTTACAAAAAAGTGAGAAAAAAGCGAAAATGAACAGGAAAAAGAAGAAA…
germline FLP recombinase	bqSi711	IV	[mex-5p FLP D5 sl2 mNG] IV	Integrated at cxTi10882. CGC	[mex-5p::FLP D5::sl2::mNeonGreen::glh-2 3' UTR Cbunc-119(+)]	BN711	Macías-León and Askjaer, 2018
RMCE landing site	jsSi1570	I	[loxP rpl-28p FRT GFP-his-58 FRT3]	CGC	[∆mosL loxP rpl-28p FRT GFP-his-58 FRT3 mosR] I	NM5322	Nonet, 2021b
RMCE landing site	jsSi1579	II	[loxP rpl-28p FRT GFP::his-58 FRT3] II	CGC	[loxP rpl-28p FRT GFP::his-58 unc-54 3' FRT3] II	NM5402	Nonet, 2021b
RMCE landing site	jsSi1669	IV	[loxP mex-5p FLP sl2 mNG rpl-28p FRT GFP-his-58 FRT3] IV	CGC	[loxP mex-5p FLP D5 sl2 mNG glh-2 3’ rpl-28p FRT GFP-his-58 his-58 3' FRT3] IV	NM5460	Nonet, 2021b
RMCE landing site	jsSi1726	II	[loxP myo-2p FRT nlsCyOFP mex-5p FLP FRT3]	CGC	[loxP myo-2p FRT nlsCyOFP myo-2 3' mex-5p FLP D5 glh-2 3' FRT3] II	NM5548	Nonet, 2023
RMCE landing site	jsSi1727	I	[loxP myo-2p FRT nlsCyOFP mex-5p FLP FRT3]	CGC	[mosL loxP myo-2p FRT nlsCyOFP myo-2 3' mex-5p FLP D5 glh-2 3' FRT3 mosR] I	NM5549	Nonet, 2023
RMCE landing site	jsSi1900	II	[loxP cup-4p FRT cyOFP mex-5p FLP FRT3]	CGC	[loxP cup-4p FRT cyOFP tbb-2 3' mex-5p FLP D5 glh-2 3' FRT3] II	NM5879	Nonet, 2023
RMCE landing site	jsTi1453	I	[loxP rpl-28p FRT GFP-his-58 FRT3] I	CGC	[mosL loxP rpl-28p FRT GFP-his-58 unc-54 3' FRT3 mosR]	NM5161	Nonet, 2020

## Sheet: Strains
Use/Figure	NM Designation	Other name	Simplified genotype (loxP, FRT sites, 3' UTRs, certain promoters, etc. are not listed unless relevant to function) see 'Transgenes and alleles' for complete genotype	Source
Fig. 1	5503		jsSi1675 [7X tetO ∆mec-7p GFP] II ; jsSi1560 [mec-4p tetR-L-QF] IV	This Study
Fig. 1	5544		jsSi1711 [14X tetO ∆mec-7p GFP] II; jsSi1560 [mec-4p tetR-L-QF] IV	This Study
Fig. 1	5545		jsSi1712 [4X tetO ∆mec-7p GFP] II; jsSi1560 [mec-4p tetR-L-QF] IV	This Study
Fig. 1	5546		jsSi1713 [2X tetO ∆mec-7p GFP] II; jsSi1560 [mec-4p tetR-L-QF] IV	This Study
Fig. 1, S1, 2	5465		jsSi1666 [1X tetO ∆mec-7p GFP] I; jsSi1560 [mec-4p tetR-L-QF] IV	This Study
Fig. 1, S1, 2, 4	5467		jsSi1543 [7X tetO ∆mec-7p GFP] I; jsSi1560 [mec-4p tTA-L-QF] IV	Nonet, 2021a
Fig. 1, S1, 2, 4	5440		jsSi1638 [2X tetO ∆mec-7p GFP] I; jsSi1560 [mec-4p tetR-L-QF] IV	This Study
Fig. 1, S1, 2, 4	5439		jsSi1639 [4X tetO ∆mec-7p GFP] I; jsSi1560 [mec-4p tetR-L-QF] IV	This Study
Fig. 1, S1, 2, 4	5464		jsSi1657 [14X tetO ∆mec-7p GFP] I; jsSi1560 [mec-4p tetR-L-QF] IV	This Study
Fig. 1, S1, 2, 4	5480		jsSi1665 [21X tetO ∆mec-7p GFP] I; jsSi1560 [mec-4p tetR-L-QF] IV	This Study
Fig. 1, S1, 2, 4	5466		jsSi1667 [28X tetO ∆mec-7p GFP] I; jsSi1560 [mec-4p tetR-L-QF] IV	This Study
Fig. 2,S2	5312		jsSi1517 [5X QUAS ∆pes-10 GFP] ; jsSi1554 [mec-4p QF2] IV	Nonet, 2020
Fig. 2,S2	5274		jsSi1527 [5X lexO ∆pes-10p GFP] I; jsSi1549 [mec-4p lexA-L-QF] IV	Nonet, 2020
Fig. 2,S2	5501		jsSi1657 [14X tetO ∆mec-7p GFP] I; met-2(n4256) III; jsSi1560 [mec-4p tTA-L-QF] IV	This Study
Fig. 2,S2	5490		jsSi1657 [14X tetO ∆mec-7p GFP] I; set-25(n5021) III; jsSi1560 [mec-4p tTA-L-QF] IV	This Study
Fig. 2,S2	5513		jsSi1692 [8X lexO ∆pes-10p GFP] I; jsSi1549 [mec-4p lexA-L-QF] IV	This Study
Fig. 2,S2	5514		jsSi1693 [13X lexO ∆pes-10p GFP] I; jsSi1549 [mec-4p lexA-L-QF] IV	This Study
Fig. 2,S2	5626		jsSi1751 [6X tetO ∆mec-7p GFP] II; jsSi1560 [mec-4p tetR-L-QF] IV	This Study
Fig. 2,S2	5698		jsSi1793 [22X UAS ∆pes-10p GFP] I; jsSi1588 [mec-4p GAL4SK-L-QF] IV	This Study
Fig. 2,S2	5706		jsSi1792 [14X UAS ∆pes-10p GFP] I; jsSi1588 [mec-4p GAL4SK-L-QF] IV	This Study
Fig. 2,S2	5699		jsSi1794 [3X UAS ∆pes-10p GFP] I; jsSi1588 [mec-4p GAL4SK-L-QF] IV	This Study
Fig. 2,S2	5714		jsSi1806 [12X tetO ∆mec-7p GFP] II; jsSi1560 [mec-4p tetR-L-QF] IV	This Study
Fig. 2,S2	5715		jsSi1807 [18X tetO ∆mec-7p GFP] II; jsSi1560 [mec-4p tetR-L-QF] IV	This Study
Fig. 2,S2	5858		jsSi1885 [10X QUAS ∆pes-10p GFP] I; jsSi1554 [mec-4p QF2] IV	This Study
Fig. 2,S2	5877		jsSi1886 [15X QUAS ∆pes-10p GFP] l; jsSi1554 [mec-4p QF2] IV	This Study
Fig. 2,S2	5859		jsSi1894 [20X QUAS ∆pes-10p GFP] I; jsSi1554 [mec-4p QF2] IV	This Study
Fig. 2,S2	5878		jsSi1895 [18X lexO ∆pes-10p GFP] I; jsSi1549 [mec-4p lexA-L-QF] IV	This Study
Fig. 2,S2	5856		jsSi1897 [11X UAS ∆pes-10p GFP] I; jsSi1588 [mec-4p GAL4SK-L-QF] IV	This Study
Fig. 2,S2	5847		jsSi1898 [6X UAS ∆pes-10p GFP] I; jsSi1588 [mec-4p GAL4SK-L-QF] IV	This Study
Fig. 2,S2	6264		jsSi2193 [myo-2p nls-GFP hygR attP 18X lexO mNG] I; jsSi1549 [mec-4p lexA-L-QF] IV	This Study
Fig. 2,S2	6263		jsSi2212 [myo-2p nls-GFP hygR attP 6X lexO mNG] I; jsSi1549 [mec-4p lexA-L-QF] IV	This Study
Fig. 2,S2	6333		jsSi2251 [myo-2p nls-GFP hygR attP 12X lexO mNG] I; jsSi1549 [mec-4p lexA-L-QF] IV	This Study
Fig. 3	5963		jsSi1678 [rps-17 3' mec-4Sp tetR-L-QF act-4 attB] I; jsSi1964 [7X tetO 900 PATC GFP] II; him-8(e1489) IV	This Study
Fig. 3	6262		jsSi1678 [rps-17 3' mec-4Sp tetR-L-QF act-4 attB] I; jsSi2226 [tetO 7X 400-R2 mec-7bp GFP] II; him-8(e1489) IV floating	This Study
Fig. 3	6283		jsSi1678 [rps-17 3' mec-4Sp tetR-L-QF act-4 attB] I; jsSi2235 [7X tetO 400-R3 mec-7bp GFP] II	This Study
Fig. 3	6373		jsSi1678 [rps-17 3' mec-4Sp tetR-L-QF act-4 attB] I; jsSi2253 [myo-2p nls-mNG hygR 7X tetO 04sp mec-7bp GFP-C1] II; him-8 floating	This Study
Fig. 3	6359		jsSi1678 [rps-17 3' mec-4Sp tetR-L-QF act-4 attB] I; jsSi2254 [myo-2p nls-mNG hygR 7X tetO 13sp mec-7bp GFP-C1] II	This Study
Fig. 3	6368		jsSi1678 [rps-17 3' mec-4Sp tetR-L-QF act-4 attB] I; jsSi2256 [myo-2p nls-mNG hygR 7X tetO 18sp 13sp mec-7bp GFP-C1] II; him-8(e1489) IV	This Study
Fig. 3	6362		jsSi1678 [rps-17 3' mec-4Sp tetR-L-QF act-4 attB] I; jsSi2259 [myo-2p nls-mNG hygR 7X tetO 18sp 04sp mec-7bp GFP-C1] II	This Study
Fig. 3, S3	6508		jsSi1678 [rps-17 3' mec-4Sp tetR-L-QF act-4 attB] I; jsSi2348 [myo-2p nls-GFP hygR attP 13X tetO-40 mNG] II	This Study
Fig. 3, S3	6462		jsSi1678 [rps-17 3' mec-4Sp tetR-L-QF act-4 attB] I; jsSi2372 [myo-2p nls-GFP hygR attP 13X tetO-37 mNG] II; him-8(e1489) IV	This Study
Fig. 3, S3	6463		jsSi1678 [rps-17 3' mec-4Sp tetR-L-QF act-4 attB] I; jsSi2374 [myo-2p nls-GFP hygR attP 13X tetO-43 mNG] II	This Study
Fig. 3, S3	6459		jsSi1678 [rps-17 3' mec-4Sp tetR-L-QF act-4 attB] I; jsSi2388 [myo-2p nls-GFP hygR attP 13X tetO-33 mNG] II	This Study
Fig. 3	6474		jsSi1725 [rps-17 3' nhx-2p tetR-LL-QF attB]/ jsSi2348 [myo-2p nls-GFP hygR attP 13X tetO-40 mNG] II	This Study
Fig. 3	6457		jsSi1725 [rps-17 3' nhx-2p tetR-LL-QF attB]/ jsSi2372 [myo-2p nls-GFP hygR attP 13X tetO-37 mNG] II	This Study
Fig. 3	6476		jsSi1725 [rps-17 3' nhx-2p tetR-LL-QF attB]/ jsSi2374 [myo-2p nls-GFP hygR attP 13X tetO-43 mNG] II	This Study
Fig. 3	6477		jsSi1725 [rps-17 3' nhx-2p tetR-LL-QF attB]/ jsSi2388 [myo-2p nls-GFP hygR attP 13X tetO-33 mNG] II	This Study
Fig. 3	6228		jsSi2180 [myo-2p nls-scarlet hygR 4X tetO mNG] I; jsSi1725 [rps-17 3' nhx-2p tetR-LL-QF attB] II	This Study
Fig. 3, S3	6243		jsSi2180 [myo-2p nls-scarlet hygR 4X tetO mNG] I; jsSi1762 [mec-4synp tetR-L-QF attB] II	This Study
Fig. 3	6230		jsSi2185 [myo-2p nls-scarlet hygR tetOD 4X mNG] I; jsSi1725 [rps-17 3' nhx-2p tetR-LL-QF attB] II	This Study
Fig. 3, S3	6288		jsSi2185 [myo-2p nls-scarlet hygR tetOD 4X mNG] I; jsSi1762 [mec-4synp tetR-L-QF attB] II	This Study
Fig. 3	6229		jsSi2194 [myo-2p nls-scarlet hygR tetOC 4X mNG] I; jsSi1725 [rps-17 3' nhx-2p tetR-LL-QF attB] II	This Study
Fig. 3, S3	6234		jsSi2194 [myo-2p nls-scarlet hygR tetOC 4X mNG] I; jsSi1762 [mec-4synp tetR-L-QF attB] II	This Study
Fig. 3	6259		jsSi2201 [myo-2p nls-scarlet hygR tetOB 4X mNG] I; jsSi1725 [rps-17 3' nhx-2p tetR-LL-QF attB] II	This Study
Fig. 3, S3	6233		jsSi2201 [myo-2p nls-scarlet hygR tetOB 4X mNG] I; jsSi1762 [mec-4synp tetR-L-QF attB] II	This Study
Fig. 3, 6, S6	5968		jsSi1678 [rps-17 3' mec-4Sp tetR-L-QF act-4 attB] I; jsSi1961 [7X tetO 400R1 GFP] II; him-8(e1489) IV floating	This Study
Fig. 3, Fig. 6, S6	6248		jsSi1678 [rps-17 3' mec-4Sp tetR-L-QF act-4 attB] I; jsSi1675 [7X tetO mec-7bp GFP] II; him-8(e1489) IV	This Study
Fig. 4, S4	5675		jsSi1543 [7X tetO ∆mec-7p GFP] I; jsSi1680 [rps-17 3' ehs-1p tetR-LL-QF attB] II	This Study
Fig. 4, S4	5672		jsSi1543 [7X tetO ∆mec-7p GFP] I; jsSi1682 [rps-17 3' cup-4p tetR-LL-QF attB] II	This Study
Fig. 4, S4	5670		jsSi1543 [7X tetO ∆mec-7p GFP] I; jsSi1683 [rps-17 3' myo-2p tetR-LL-QF attB] II	This Study
Fig. 4, S4	5680		jsSi1543 [7X tetO ∆mec-7p GFP] I; jsSi1685 [rps-17 3' dpy-7p tetR-LL-QF attB] II	This Study
Fig. 4, S4	5681		jsSi1543 [7X tetO ∆mec-7p GFP] I; jsSi1696 [rps-17 3' myo-3p tetR-LL-QF attB] II	This Study
Fig. 4, S4	5661		jsSi1543 [7X tetO ∆mec-7p GFP] I; jsSi1720 [rps-17 3' vha-6p tetR-LL-QF attB] II; jsSi1560 [mec-4p tTA-L-QF] IV floating	This Study
Fig. 4, S4	5757		jsSi1638 [2X tetO ∆mec-7p GFP tbb-2 3'UTR] I; jsSi1682 [rps-17 3' cup-4p tetR-LL-QF attB] II; him-8(e1489) IV	This Study
Fig. 4, S4	5755		jsSi1638 [2X tetO m7bp GFP tbb-2 3'UTR] I; jsSi1680 [rps-17 3' ehs-1p tetR-LL-QF attB] II; him-8(e1489) IV	This Study
Fig. 4, S4	5756		jsSi1638 [2X tetO m7bp GFP tbb-2 3'UTR] I; jsSi1680 [rps-17 3' ehs-1p tetR-LL-QF attB] II; him-8(e1489) IV	This Study
Fig. 4, S4	5742		jsSi1638 [2X tetO m7bp GFP tbb-2 3'UTR] I; jsSi1683 [rps-17 3' myo-2p tetR-LL-QF attB] II; him-8(e1489) IV	This Study
Fig. 4, S4	5762		jsSi1638 [2X tetO m7bp GFP tbb-2 3'UTR] I; jsSi1685 [rps-17 3' dpy-7p tetR-LL-QF attB] II; him-8(e1489) IV	This Study
Fig. 4, S4	5760		jsSi1638 [2X tetO m7bp GFP tbb-2 3'UTR] I; jsSi1696 [rps-17 3' myo-3p tetR-LL-QF attB] II; him-8(e1489) IV	This Study
Fig. 4, S4	5734		jsSi1638 [2X tetO m7bp GFP tbb-2 3'UTR] I; jsSi1720 [rps-17 3' vha-6p tetR-LL-QF attB] II; him-8(e1489) IV	This Study
Fig. 4, S4	5758		jsSi1639 [4X tetO ∆mec-7p GFP] I; jsSi1682 [rps-17 3' cup-4p tetR-LL-QF attB] II; him-8(e1489) IV	This Study
Fig. 4, S4	5659		jsSi1639 [4X tetO m7bp GFP] I; jsSi1683 [rps-17 3' myo-2p tetR-LL-QF attB] II; jsSi1560 [mec-4p tTA-L-QF] IV floating	This Study
Fig. 4, S4	5729		jsSi1639 [4X tetO m7bp GFP] I; jsSi1685 [rps-17 3' dpy-7p tetR-LL-QF attB] II; jsSi1560 [mec-4p tTA-L-QF] IV floating	This Study
Fig. 4, S4	5761		jsSi1639 [4X tetO m7bp GFP] I; jsSi1696 [rps-17 3' myo-3p tetR-LL-QF attB] II; jsSi1560 [mec-4p tTA-L-QF] IV floating	This Study
Fig. 4, S4	5658		jsSi1639 [4X tetO m7bp GFP] I; jsSi1720 [rps-17 3' vha-6p tetR-LL-QF attB] II; jsSi1560 [mec-4p tTA-L-QF] IV floating	This Study
Fig. 4, S4	5674		jsSi1657 [14X tetO ∆mec-7p GFP] I; jsSi1682 [rps-17 3' cup-4p tetR-LL-QF attB] II	This Study
Fig. 4, S4	5676		jsSi1657 [14X tetO GFP] I; jsSi1680 [rps-17 3' ehs-1p tetR-LL-QF attB] II	This Study
Fig. 4, S4	5663		jsSi1657 [14X tetO GFP] I; jsSi1683 [rps-17 3' myo-2p tetR-LL-QF attB] II	This Study
Fig. 4, S4	5682		jsSi1657 [14X tetO GFP] I; jsSi1685 [rps-17 3' dpy-7p tetR-LL-QF attB] II	This Study
Fig. 4, S4	5671		jsSi1657 [14X tetO GFP] I; jsSi1696 [rps-17 3' myo-3p tetR-LL-QF attB] II	This Study
Fig. 4, S4	5662		jsSi1657 [14X tetO GFP] I; jsSi1720 [rps-17 3' vha-6p tetR-LL-QF attB] II; jsSi1560 [mec-4p tTA-L-QF] IV floating	This Study
Fig. 4, S4	5689		jsSi1665 [21X tetO ∆mec-7p GFP] I; jsSi1682 [rps-17 3' cup-4p tetR-LL-QF attB] II	This Study
Fig. 4, S4	5691		jsSi1665 [21X tetO GFP] I; jsSi1680 [rps-17 3' ehs-1p tetR-LL-QF attB] II	This Study
Fig. 4, S4	5660		jsSi1665 [21X tetO GFP] I; jsSi1683 [rps-17 3' myo-2p tetR-LL-QF attB] II; jsSi1560 [mec-4p tTA-L-QF] IV floating	This Study
Fig. 4, S4	5707		jsSi1665 [21X tetO GFP] I; jsSi1685 [rps-17 3' dpy-7p tetR-LL-QF attB] II; jsSi1560 [mec-4p tTA-L-QF] IV floating	This Study
Fig. 4, S4	5693		jsSi1665 [21X tetO GFP] I; jsSi1696 [rps-17 3' myo-3p tetR-LL-QF attB] II	This Study
Fig. 4, S4	5667		jsSi1665 [21X tetO GFP] I; jsSi1720 [rps-17 3' vha-6p tetR-LL-QF attB] II; him-8(e1489) IV floating	This Study
Fig. 4, S4	5690		jsSi1667 [28X tetO ∆mec-7p GFP] I; jsSi1682 [rps-17 3' cup-4p tetR-LL-QF attB] II	This Study
Fig. 4, S4	5692		jsSi1667 [28X tetO GFP] I; jsSi1680 [rps-17 3' ehs-1p tetR-LL-QF attB] II	This Study
Fig. 4, S4	5700		jsSi1667 [28X tetO GFP] I; jsSi1683 [rps-17 3' myo-2p tetR-LL-QF attB] II	This Study
Fig. 4, S4	5695		jsSi1667 [28X tetO GFP] I; jsSi1685 [rps-17 3' dpy-7p tetR-LL-QF attB] II; jsSi1560 [mec-4p tTA-L-QF] IV floating	This Study
Fig. 4, S4	5694		jsSi1667 [28X tetO GFP] I; jsSi1696 [rps-17 3' myo-3p tetR-LL-QF attB] II	This Study
Fig. 4, S4	5739		jsSi1667 [28X tetO GFP] I; jsSi1720 [rps-17 3' vha-6p tetR-LL-QF attB] II; jsSi1560 [mec-4p tTA-L-QF] IV floating	This Study
Fig. 4, S4	6616		jsSi1543 [7X tetO ∆mec-7p GFP] I; jsSi1670 [rps-17 3' mec-4synp tetR-L-QF attB] II	This Study
Fig. 4, S4	6611		jsSi1638 [2X tetO m7bp GFP tbb-2 3'UTR] I; jsSi1670 [rps-17 3' mec-4synp tetR-L-QF attB] II	This Study
Fig. 4, S4	6617		jsSi1639 [4X tetO m7bp GFP] I; jsSi1670 [rps-17 3' mec-4synp tetR-L-QF attB] II	This Study
Fig. 4, S4	6628		jsSi1657 [14X tetO GFP] I; jsSi1670 [rps-17 3' mec-4synp tetR-L-QF attB] II	This Study
Fig. 4, S4	6629		jsSi1665 [21X tetO GFP] I; jsSi1670 [rps-17 3' mec-4synp tetR-L-QF attB] II	This Study
Fig. 4, S4	6630		jsSi1667 [28X tetO GFP] I; jsSi1670 [rps-17 3' mec-4synp tetR-L-QF attB] II	This Study
Fig. 5, S5	6661		jsSi1670 [rps-17 3' mec-4synp tetR-L-QF attB] II/ jsSi2279 [tetO 7X ∆lys-8p GFP] II	This Study
Fig. 5, S5	6578		jsSi1675 [7X tetO mec-7bp GFP] / jsSi1670 [rps-17 3' mec-4synp tetR-L-QF attB] II	This Study
Fig. 5, S5	6580		jsSi1675 [7X tetO mec-7bp GFP] / jsSi1725 [rps-17 3' nhx-2p tetR-LL-QF attB] II	This Study
Fig. 5, S5	6575		jsSi1729 [7X tetO ∆pes-10 ∆mec-7p GFP] / jsSi1670 [rps-17 3' mec-4synp tetR-L-QF attB] II	This Study
Fig. 5, S5	6579		jsSi1729 [7X tetO ∆pes-10 ∆mec-7p GFP] / jsSi1725 [rps-17 3' nhx-2p tetR-LL-QF attB] II	This Study
Fig. 5, S5	NF		jsSi2266 [7X tetO act-4bp GFP] / jsSi1670 [rps-17 3' mec-4synp tetR-L-QF attB] II	This Study
Fig. 5, S5	6487		jsSi2266 [7X tetO act-4bp GFP] / jsSi1725 [rps-17 3' nhx-2p tetR-LL-QF attB] II	This Study
Fig. 5, S5	6491		jsSi2279 [7X tetO ∆lys-8p GFP] / jsSi1725 [rps-17 3' nhx-2p tetR-LL-QF attB] II; jsSi1678 [rps-17 3' mec-4Sp tetR-L-QF act-4 attB] I	This Study
Fig. 5, S5	6576		jsSi2280 [7X tetO ∆tbb-2p GFP] / jsSi1670[rps-17 3' mec-4synp tetR-L-QF attB] II	This Study
Fig. 5, S5	6577		jsSi2280 [7X tetO ∆tbb-2p GFP] / jsSi1725 [rps-17 3' nhx-2p tetR-LL-QF attB] II	This Study
Fig. 5, S5	NF		jsSi2325 [myo-2p nls-scarlet hygR 7X tetO ∆act-4bp2 GFP] / jsSi1670 [rps-17 3' mec-4synp tetR-L-QF attB] II	This Study
Fig. 5, S5	6483		jsSi2325 [myo-2p nls-scarlet hygR 7X tetO ∆act-4bp2 GFP]/ jsSi1725 [rps-17 3' nhx-2p tetR-LL-QF attB] II	This Study
Fig. 5, S5	6465		jsSi2326 [myo-2p nls-scarlet hygR 7X tetO act-4bp4 GFP] / jsSi1670 [rps-17 3' mec-4synp tetR-L-QF attB] II	This Study
Fig. 5, S5	6469		jsSi2326 [myo-2p nls-scarlet hygR 7X tetO act-4bp4 GFP] / jsSi1725 [rps-17 3' nhx-2p tetR-LL-QF attB] II	This Study
Fig. 5, S5	NF		jsSi2331 [myo-2p nls-scarlet hygR 7X tetO ∆act-4bp3 GFP] / jsSi1670 [rps-17 3' mec-4synp tetR-L-QF attB] II	This Study
Fig. 5, S5	6484		jsSi2331 [myo-2p nls-scarlet hygR 7X tetO ∆act-4bp3 GFP]/ jsSi1725 [rps-17 3' nhx-2p tetR-LL-QF attB] II	This Study
Fig. 5, S5	6466		jsSi2339 [myo-2p nls-scarlet hygR 7X tetO ∆tbb-2bp2 GFP] / jsSi1670 [rps-17 3' mec-4synp tetR-L-QF attB] II	This Study
Fig. 5, S5	6470		jsSi2339 [myo-2p nls-scarlet hygR 7X tetO ∆tbb-2bp2 GFP]/ jsSi1725 [rps-17 3' nhx-2p tetR-LL-QF attB] II	This Study
Fig. 5, S5	6467		jsSi2342 [myo-2p nls-scarlet hygR 7X tetO ∆lys-8bp2 GFP] / jsSi1670 [rps-17 3' mec-4synp tetR-L-QF attB] II	This Study
Fig. 5, S5	6471		jsSi2342 [myo-2p nls-scarlet hygR 7X tetO ∆lys-8bp2 GFP] / jsSi1725 [rps-17 3' nhx-2p tetR-LL-QF attB] II	This Study
Fig. 5, S5	6472		jsSi2344 [myo-2p nls-scarlet hygR 7X tetO ∆act-4p GFP] / jsSi1725 [rps-17 3' nhx-2p tetR-LL-QF attB] II	This Study
Fig. 5, S5	6468		jsSi2344 [myo-2p nls-scarlet hygR 7X tetO ∆act-4p GFP]/ jsSi1670 [rps-17 3' mec-4synp tetR-L-QF attB] II	This Study
Fig. 5, S5	6563		jsSi2440 [7X tetO ∆lys-8bp2 GFP] / jsSi1670 [rps-17 3' mec-4synp tetR-L-QF attB] II	This Study
Fig. 5, S5	6566		jsSi2440 [7X tetO ∆lys-8bp2 GFP] / jsSi1725 [rps-17 3' nhx-2p tetR-LL-QF attB] II	This Study
Fig. 5, S5	6564		jsSi2441 [7X tetO act-4bp4 GFP] / jsSi1670 [rps-17 3' mec-4synp tetR-L-QF attB] II	This Study
Fig. 5, S5	6567		jsSi2441 [7X tetO act-4bp4 GFP] / jsSi1725 [rps-17 3' nhx-2p tetR-LL-QF attB] II	This Study
Fig. 5, S5	6527		jsSi2441 [7X tetO act-4bp4 GFP] II	This Study
Fig. 5, S5	6565		jsSi2447 [7X tetO ∆pes-10p GFP] / jsSi1670 [rps-17 3' mec-4synp tetR-L-QF attB] II	This Study
Fig. 5, S5	6568		jsSi2447 [7X tetO ∆pes-10p GFP] / jsSi1725 [rps-17 3' nhx-2p tetR-LL-QF attB] II	This Study
Fig. 5, S5, for Fig. 6, 7, S4	5543		jsSi1725 [rps-17 3' nhx-2p tetR-LL-QF attB] II; him-8(e1489) IV	This Study
Fig. 5, S4, S5, for Fig. 4	5475		jsSi1670 [rps-17 3' mec-4synp tetR-L-QF attB] II; him-8(e1489) IV	This Study
Fig. 6	6622		jsSi1670 [rps-17 3' mec-4synp tetR-L-QF attB]/ jsSi2292 [myo-2p nls-GFP hygR attP nls-scarlet tetO nls-GFP] II	This Study
Fig. 6, S6	5956		jsSi1678 [rps-17 3' mec-4Sp tetR-L-QF act-4 attB] I; jsSi1958 [attP 7X tetO ∆p200-1 GFP] II; him-8(e1489) IV floating	This Study
Fig. 6, S6	5957		jsSi1678 [rps-17 3' mec-4Sp tetR-L-QF act-4 attB] I; jsSi1959 [attP 7X tetO ∆p200-2 GFP] II; him-8(e1489) IV floating	This Study
Fig. 6, S6	5958		jsSi1678 [rps-17 3' mec-4Sp tetR-L-QF act-4 attB] I; jsSi1960 [attP 7X tetO ∆p200-3 GFP] II; him-8(e1489) IV floating	This Study
Fig. 6, S6	6646		jsSi1678 [rps-17 3' mec-4Sp tetR-L-QF act-4 attB] I; jsSi2497 [myo-2p nls-scarlet hygR attP tetO 7X kozak GFP] II	This Study
Fig. 6, S6	6672		jsSi1678 [rps-17 3' mec-4Sp tetR-L-QF act-4 attB] I; jsSi2504 [myo-2p nls-scarlet hygR attP tetO 7X ts Kozak GFP] II	This Study
Fig. 6	6621		jsSi1725 [rps-17 3' nhx-2p tetR-LL-QF attB]/ jsSi2292 [myo-2p nls-GFP hygR attP nls-scarlet tetO nls-GFP] II	This Study
Fig. 7	6627		jsSi1725 [rps-17 3' nhx-2p tetR-LL-QF attB] jsSi2338 [myo-2p nls-GFP hygR 7X tetO ∆mec-7bp scarlet let-858 3' sl2 mNG] II	This Study
Fig. 7	6500		jsSi1725 [rps-17 3' nhx-2p tetR-LL-QF attB]/ jsSi2329 [myo-2p nls-GFP hygR 7X tetO ∆mec-7p scarlet unc-54 3' sl2 mNG] II	This Study
Fig. 7	6626		jsSi1725 [rps-17 3' nhx-2p tetR-LL-QF attB]/ jsSi2332 [myo-2p nls-GFP hygR 7X tetO ∆pes-10bp scarlet unc-54 3' sl2 mNG] II	This Study
Fig. 7	6504		jsSi1725 [rps-17 3' nhx-2p tetR-LL-QF attB]/ jsSi2334 [myo-2p nls-GFP hygR 7X tetO ∆pes-10p scarlet let-858 3' sl2 mNG] II	This Study
Fig. 7	6503		jsSi1725 [rps-17 3' nhx-2p tetR-LL-QF attB]/ jsSi2384 [myo-2p nls-GFP hygR 7X tetO ∆mec-7p scarlet tbb-2 3' sl2 mNG] II; him-8(e1489) IV floating	This Study
Fig. 7	6572		jsSi1725 [rps-17 3' nhx-2p tetR-LL-QF attB]/ jsSi2396 [myo-2p nls-GFP hygR 7X tetO ∆pes-10p scarlet rps-0 3' gpd2 mNG] II	This Study
Fig. 7	6583		jsSi1725 [rps-17 3' nhx-2p tetR-LL-QF attB]/ jsSi2407 [myo-2p nls-GFP hygR 7X tetO ∆pes-10p scarlet glh-2 3' gpd-2 mNG] II	This Study
Fig. 7	6588		jsSi1725 [rps-17 3' nhx-2p tetR-LL-QF attB]/ jsSi2413 [myo-2p nls-GFP hygR 7X tetO ∆pes-10p scarlet act-4 3' gpd2 mNG] II	This Study
Fig. 7	6592		jsSi1725 [rps-17 3' nhx-2p tetR-LL-QF attB]/ jsSi2416 [myo-2p nls-GFP hygR 7X tetO ∆pes-10p scarlet rps-9 3' gpd2 mNG] II	This Study
Fig. 7	6597		jsSi1725 [rps-17 3' nhx-2p tetR-LL-QF attB]/ jsSi2424 [myo-2p nls-GFP hygR 7X tetO ∆pes-10p scarlet ter-222 3' gpd2 mNG] II	This Study
Fig. 7	6599		jsSi1725 [rps-17 3' nhx-2p tetR-LL-QF attB]/ jsSi2425 [myo-2p nls-GFP hygR 7X tetO ∆pes-10p scarlet ubl-1 3' gpd2 mNG] II	This Study
Fig. 7	6605		jsSi1725 [rps-17 3' nhx-2p tetR-LL-QF attB]/ jsSi2475 [myo-2p nls-GFP hygR 7X tetO ∆pes-10p scarlet eef-2 3' gpd2 mNG] II	This Study
Fig. 7	6366		jsSi2312 [tbb-2 3' UTR ∆mec-7p nls-GFP] II	This Study
Fig. 7	6381		jsSi2321 [cup-4p nls-scarlet hygR R400 let-858 3' ∆mec-7bp nls-GFP] II	This Study
Fig. 7	6438		jsSi2369 [cup-4p nls-scarlet hygR R400 glh-2 3' ∆mec-7bp nls-GFP] II	This Study
Fig. 7	6441		jsSi2370 [cup-4p nls-scarlet hygR R400 rps-9 3' ∆mec-7bp nls-GFP] II	This Study
Fig. 7	6439		jsSi2373 [cup-4p nls-scarlet hygR R400 ubl-1 3' ∆mec-7bp nls-GFP] II	This Study
Fig. 7	6443		jsSi2376 [cup-4p nls-scarlet hygR R400 eef-2 3' ∆mec-7bp nls-GFP] II	This Study
Fig. 7	6436		jsSi2380 [cup-4p nls-scarlet hygR R400 ter222 ∆mec-7bp nls-GFP] II	This Study
Fig. 7	6801		jsSi2612 [[cup-4p nls-scarlet hygR ∆mec-7 nls-GFP]	This Study
Fig. S3	6380		jsSi1549 [mec-4p lexA-L-QF] IV; jsSi2269 [myo-2p nls-GFP hygR 13X lexO mec-7bp mNG attB] I; him-8(e1489) IV floating	This Study
Fig. S3	6387		jsSi1554 [mec-4p QF2] IV; jsSi2270 [myo-2p nls-GFP hygR QUAS 13X mec-7bp mNG attB] I; him-8(e1489) IV floating	This Study
Fig. S4	5828		jsSi1543 [7X tetO ∆mec-7p GFP] I; jsSi1601 [phat-5p::tetR-L-QF::act-4 3'UTR] II	This Study
Fig. S4	6625		jsSi1543 [7X tetO ∆mec-7p GFP] I; jsSi1725 [rps-17 3' nhx-2p tetR-LL-QF attB] II	This Study
Fig. S4	5789		jsSi1601 [phat-5p::tetR-L-QF::act-4 3'UTR] II; him-8(e1489) IV	This Study
Fig. S4	6610		jsSi1638 [2X tetO m7bp GFP tbb-2 3'UTR] I; jsSi1601 [phat-5p tetR-L-QF act-4 3'UTR] II	This Study
Fig. S4	6612		jsSi1638 [2X tetO m7bp GFP tbb-2 3'UTR] I; jsSi1725 [rps-17 3' nhx-2p tetR-LL-QF attB] II	This Study
Fig. S4	5827		jsSi1639 [4X tetO m7bp GFP] I; jsSi1601 [phat-5p::tetR-L-QF::act-4 3'UTR] II; him-8(e1489) IV	This Study
Fig. S4	6613		jsSi1639 [4X tetO m7bp GFP] I; jsSi1725 [rps-17 3' nhx-2p tetR-LL-QF attB] II	This Study
Fig. S4	5829		jsSi1657 [14X tetO GFP] I; jsSi1601 [phat-5p::tetR-L-QF::act-4 3'UTR] II	This Study
Fig. S4	6614		jsSi1657 [14X tetO GFP] I; jsSi1725 [rps-17 3' nhx-2p tetR-LL-QF attB] II	This Study
Fig. S4	5830		jsSi1665 [21X tetO GFP] I; jsSi1601 [phat-5p::tetR-L-QF::act-4 3'UTR] II	This Study
Fig. S4	5696		jsSi1665 [21X tetO GFP] I; jsSi1725 [rps-17 3' nhx-2p tetR-LL-QF attB] II; jsSi1560 [mec-4p tTA-L-QF] IV floating	This Study
Fig. S4	5831		jsSi1667 [28X tetO GFP] I; jsSi1601 [phat-5p::tetR-L-QF::act-4 3'UTR] II; him-8(e1489) IV	This Study
Fig. S4	5701		jsSi1667 [28X tetO GFP] I; jsSi1725 [rps-17 3' nhx-2p tetR-LL-QF attB] II	This Study
for Fig. S5	5973		jsSi2000 [myo-2 nls-Scarlet hygR 7X tetO ∆pals-5p GFP] II	This Study
Fig. S5	6310		jsSi2267 [tetO 7X ∆pals-5p GFP]	This Study
Fig. S7	6370		jsSi2313 [myo-2p nls-scarlet hygR unc-54 3' mec-7bp nls-GFP] II	This Study
Fig. S7	6377		jsSi2319 [cup-4p nls-scarlet hygR act-4 3' ∆mec-7bp nls-GFP] II	This Study
Fig. S7	6378		jsSi2320 [cup-4p nls-scarlet hygR rps-2 3' ∆mec-7bp nls-GFP] II	This Study
Fig. S7	6386		jsSi2323 [cup-4p nls-scarlet hygR tbb-2 3' ∆mec-7bp nls-GFP] II	This Study
Fig. S7	6410		jsSi2345 [myo-2p nls-scarlet hygR R400 QFAD ∆mec-7bp nls-GFP] II	This Study
Fig. S7	6413		jsSi2352 [cup-4p nls-scarlet hygR rps-0 3' ∆mec-7bp nls-GFP] II	This Study
for Fig. 1	6624		jsSi1711 [14X tetO ∆mec-7p GFP] II; him-8(e1489) IV	This Study
for Fig. 1	6620		jsSi1712 [4X tetO ∆mec-7p GFP] II; him-8(e1489) IV	This Study
for Fig. 1	6619		jsSi1713 [2X tetO ∆mec-7p GFP] II; him-8(e1489) IV	This Study
for Fig. 1 ,2, 4	5295		jsSi1560 [mec-4p tetR-L-QF] IV	Nonet, 2020
for Fig. 1, 2	6647		jsSi1666 [[1X tetO ∆mec-7p GFP] I ; him-8(e1489) IV	This Study
for Fig. 1, 2, 4	5264		jsSi1543 [7X tetO ∆mec-7p GFP] I; him-8(e1489) IV	Nonet, 2020
for Fig. 1, 2, 4	5791		jsSi1638 [2X tetO ∆mec-7p GFP] I; him-8(e1489) IV	This Study
for Fig. 1, 2, 4	5790		jsSi1639 [4X tetO ∆mec-7p GFP] I; him-8(e1489) IV	This Study
for Fig. 1, 2, 4	5783		jsSi1657 [14X tetO ∆mec-7p GFP] I; him-8(e1489) IV	This Study
for Fig. 1, 2, 4	5802		jsSi1665 [21X tetO ∆mec-7p GFP] I; him-8(e1489) IV	This Study
for Fig. 1, 2, 4	5798		jsSi1667 [28X tetO ∆mec-7p GFP] I; him-8(e1489) IV	This Study
Fig. 5, S5, for Fig. 1, 3	5494		jsSi1675 [7X tetO ∆mec-7p GFP] II; him-8(e1489) IV	This Study
for Fig. 2	5212		jsSi1517 [5X QUAS ∆pes-10p GFP] I; him-8 IV	Nonet, 2020
for Fig. 2	5227		jsSi1527 l5X lexO 5X ∆pes-10 GFP] I; him-8(e1489) IV	Nonet, 2020
for Fig. 2	5268		jsSi1549 [mec-4p LexA-L-QF] IV	Nonet, 2020
for Fig. 2	5273		jsSi1554 I [mec-4p QF2] IV	Nonet, 2020
for Fig. 2	5353		jsSi1588 [mec-4p GAL4SK-L-QF] IV	Nonet, 2021a
for Fig. 2	5510		jsSi1692 [lexO 8X ∆pes-10p GFP] I; him-8(e1489) IV	This Study
for Fig. 2	5511		jsSi1693 [lexO 13X ∆pes-10p GFP] I; him-8(e1489) IV	This Study
for Fig. 2	5605		jsSi1751 [6X tetO ∆mec-7p GFP] II; him-8(e1489) IV	This Study
for Fig. 2	5684		jsSi1792 [14X UAS ∆pes-10p GFP] I; him-8 IV	This Study
for Fig. 2	5685		jsSi1793 [22X UAS ∆pes-10p GFP] I; him-8 IV	This Study
for Fig. 2	5686		jsSi1794 [3X UAS ∆pes-10p GFP] I; him-8 IV	This Study
for Fig. 2	5721		jsSi1806 [12X tetO ∆mec-7p GFP] II; him-8(e1489) IV	This Study
for Fig. 2	5722		jsSi1807 [18X tetO ∆mec-7p GFP] II; him-8(e1489) IV	This Study
for Fig. 2	5865		jsSi1885 [10X QUAS ∆pes-10p GFP] I	This Study
for Fig. 2	5839		jsSi1886 [15X QUAS ∆pes-10p GFP] I	This Study
for Fig. 2	5836		jsSi1894 [20X QUAS ∆pes-10p GFP] I	This Study
for Fig. 2	5837		jsSi1895 [lexO 18X ∆pes-10p GFP] I	This Study
for Fig. 2	5843		jsSi1897 [12X UAS ∆pes-10p GFP] I; bqSi711 IV	This Study
for Fig. 2	5844		jsSi1898 [6X UAS ∆pes-10p GFP] I; bqSi711 IV	This Study
for Fig. 2	6201		jsSi2193 [myo-2p nls-GFP hygR attP 18X lexO mNG] I	This Study
for Fig. 2	6227		jsSi2212 [myo-2p nls-GFP hygR attP 6X lexO mNG] I	This Study
for Fig. 2	6298		jsSi2251 [myo-2p nls-GFP hygR attP 12X lexO mNG] I	This Study
for Fig. 2	5478	MT13293	met-2(n4256) III	CGC
for Fig. 2	5477	MT17463	set-25(n5021) III	CGC
for Fig. 3	5567		jsSi1762 [mec-4synp tetR-L-QF attB] II; him-8(e1489) IV	This Study
for Fig. 3	5935		jsSi1964 [7X tetO 900 PATC GFP] II	This Study
for Fig. 3	6179		jsSi2180 [myo-2p nls-scarlet hygR 4X tetO mNG] I	This Study
for Fig. 3	6188		jsSi2185 [myo-2p nls-scarlet hygR 4X tetOD mNG] I	This Study
for Fig. 3	6203		jsSi2194 [myo-2p nls-scarlet hygR 4X tetOC mNG] I	This Study
for Fig. 3	6202		jsSi2201 [myo-2p nls-scarlet hygR 4X tetOB mNG] I	This Study
for Fig. 3	6257		jsSi2226 [tetO 7X 400-R2 mec-7bp GFP] II	This Study
for Fig. 3	6266		jsSi2235 [7X tetO 400-R3 mec-7bp GFP] II	This Study
for Fig. 3	6302		jsSi2253 [myo-2p nls-mNG hygR 7X tetO 04sp mec-7bp GFP-C1] II	This Study
for Fig. 3	6303		jsSi2254 [myo-2p nls-mNG hygR 7X tetO 13sp mec-7bp GFP-C1] II	This Study
for Fig. 3	6305		jsSi2256 [myo-2p nls-mNG hygR 7X tetO 18sp 13sp mec-7bp GFP-C1] II	This Study
for Fig. 3	6311		jsSi2259 [myo-2p nls-mNG hygR 7X tetO 18sp 04sp mec-7bp GFP-C1] II	This Study
for Fig. 3	6407		jsSi2348 [myo-2p nls-GFP hygR attP 13X tetO-40 mNG] II	This Study
for Fig. 3	6432		jsSi2372 [myo-2p nls-GFP hygR attP 13X tetO-37 mNG] II	This Study
for Fig. 3	6433		jsSi2374 [myo-2p nls-GFP hygR attP 13X tetO-43 mNG] II	This Study
for Fig. 3	6450		jsSi2388 [myo-2p nls-GFP hygR attP 13X tetO-33 mNG] II	This Study
for Fig. 3, 6	5926		jsSi1961 [7X tetO 400R1 GFP] II	This Study
for Fig. 3, Fig. 6	5497		jsSi1678 [rps-17 3' mec-4Sp tetR-L-QF act-4 attB] I; him-8(e1489) IV	This Study
for Fig. 4	5531		jsSi1680 [rps-17 3' ehs-1p tetR-LL-QF attB] II; him-8(e1489) IV	This Study
for Fig. 4	5509		jsSi1682 [rps-17 3' cup-4p tetR-LL-QF attB] II; him-8(e1489) IV	This Study
for Fig. 4	5532		jsSi1683 [rps-17 3' myo-2p tetR-LL-QF attB] II; him-8(e1489) IV	This Study
for Fig. 4	5533		jsSi1685 [rps-17 3' dpy-7p tetR-LL-QF attB] II; him-8(e1489) IV	This Study
for Fig. 4	5537		jsSi1696 [rps-17 3' myo-3p tetR-LL-QF attB] II; him-8(e1489) IV	This Study
for Fig. 4	5587		jsSi1720 [rps-17 3' vha-6p tetR-LL-QF attB] II; him-8(e1489) IV	This Study
for Fig. 5	5631		jsSi1729 [7X tetO ∆pes-10 ∆mec-7p GFP] II; him-8(e1489) IV	This Study
for Fig. 5	5984		jsSi2003 [myo-2p nls-scarlet hygR tetO 7X ∆tbb-2p GFP] II	This Study
for Fig. 5	5995		jsSi2014 [myo-2p nls-scarlet hygR tetO 7X ∆lys-8 GFP] II	This Study
for Fig. 5	6012		jsSi2026 [myo-2p nls-Scarlet hygR tetO 7X act-4bp GFP] II	This Study
for Fig. 5	6309		jsSi2266 [7X tetO act-4bp GFP] II	This Study
for Fig. 5	6650		jsSi2279 [7X tetO ∆lys-8p GFP] II; him-8(e1489) floating	This Study
for Fig. 5	6529		jsSi2280 [7X tetO ∆tbb-2p GFP] II	This Study
for fig. 5	6331		jsSi2296 [myo-2p Scarlet HygR UTR tbb-2 3' ∆mec-7p nls-GFP] II	This Study
for Fig. 5	6383		jsSi2325 [myo-2p nls-scarlet hygR 7X tetO ∆act-4bp2 GFP] II	This Study
for Fig. 5	6384		jsSi2326 [myo-2p nls-scarlet hygR 7X tetO act-4bp4 GFP] II	This Study
for Fig. 5	6392		jsSi2331 [myo-2p nls-scarlet hygR 7X tetO ∆act-4bp3 GFP] II	This Study
for Fig. 5	6398		jsSi2339 [myo-2p nls-scarlet hygR 7X tetO ∆tbb-2bp2 GFP] II	This Study
for Fig. 5	6400		jsSi2342 [myo-2p nls-scarlet hygR 7X tetO ∆lys-8bp2 GFP] II	This Study
for Fig. 5	6408		jsSi2344 [myo-2p nls-scarlet hygR 7X tetO ∆act-4p GFP] II	This Study
for Fig. 5	6523		jsSi2435 [myo-2p Scarlet 2X hygR tetO 7X ∆pes-10p GFP] II	This Study
for Fig. 5	6526		jsSi2440 [7X tetO ∆lys-8bp2 GFP] II	This Study
for Fig. 5	6543		jsSi2447 [7X tetO ∆pes-10p GFP] II	This Study
for Fig. 6	5933		jsSi1958 [attP 7X tetO ∆p200-1 GFP] II	This Study
for Fig. 6	5924		jsSi1959 [attP 7X tetO ∆p200-2 GFP] II	This Study
for Fig. 6	5925		jsSi1960 [attP 7X tetO ∆p200-3 GFP] II	This Study
for Fig. 6	6347		jsSi2292 [myo-2p nls-GFP hygR attP nls-scarlet tetO nls-GFP] II	This Study
for Fig. 6	6636		jsSi2497 [myo-2p nls-scarlet hygR attP tetO 7X kozak GFP] II	This Study
for Fig. 6	6645		jsSi2504 [myo-2p nls-scarlet hygR attP tetO 7X ts kozak GFP] II	This Study
for Fig. 7	6390		jsSi2329 [myo-2p nls-GFP hygR 7X tetO ∆mec-7bp scarlet unc-54 3' sl2 mNG] II	This Study
for Fig. 7	6395		jsSi2332 [myo-2p nls-GFP hygR 7X tetO ∆pes-10bp scarlet unc-54 3' sl2 mNG] II	This Study
for Fig. 7	6393		jsSi2334 [myo-2p nls-GFP hygR 7X tetO ∆pes-10bp scarlet let-858 3' sl2 mNG] II	This Study
for Fig. 7	6397		jsSi2338 [myo-2p nls-GFP hygR 7X tetO ∆mec-7bp scarlet let-858 3' sl2 mNG] II	This Study
for Fig. 7	6447		jsSi2384 [myo-2p nls-GFP hygR 7X tetO ∆mec-7bp scarlet tbb-2 3' sl2 mNG] II	This Study
for Fig. 7	6482		jsSi2396 [myo-2p nls-GFP hygR 7X tetO ∆pes-10 scarlet rps-0 3' gpd2 mNG] II	This Study
for Fig. 7	6490		jsSi2407 [myo-2p nls-GFP hygR 7X tetO ∆pes-10p glh-2 3' Scarlet gpd-2 sl2 mNG] II	This Study
for Fig. 7	6505		jsSi2413 [myo-2p nls-GFP hygR 7X tetO ∆pes-10 scarlet act-4 3' gpd2 mNG] II	This Study
for Fig. 7	6509		jsSi2416 [myo-2p nls-GFP hygR 7X tetO ∆pes-10 scarlet rps-9 3' gpd2 mNG] II	This Study
for Fig. 7	6525		jsSi2424 [myo-2p nls-GFP hygR 7X tetO ∆pes-10 scarlet ter-222 3' gpd2 mNG] II	This Study
for Fig. 7	6522		jsSi2425 [myo-2p nls-GFP hygR 7X tetO ∆pes-10 scarlet ubl-1 3' gpd2 mNG] II	This Study
for Fig. 7	6591		jsSi2475 [myo-2p nls-GFP hygR 7X tetO ∆pes-10 scarlet eef-2 3' gpd2 mNG] II	This Study
for RMCE	5322		jsSi1570 [loxP rpl-28p FRT GFP-his-58 FRT3] I; bqSi711 [mex-5p FLP sl2 mNG + Cbunc-119(+)] IV	Nonet, 2021b
for RMCE	5402		jsSi1579 [loxP rpl-28p FRT GFP-his-58 FRT3] II; bqSi711 [mex-5p FLP sl2 mNG + Cbunc-119(+)] IV	Nonet, 2021b
for RMCE	5460		jsSi1669 [loxP mex-5p FLP sl2 mNG rpl-28p FRT GFP-his-58 FRT3]	Nonet, 2021b
for RMCE	5548		jsSi1726 [loxP myo-2p FRT nlsCyOFP mex-5p FLP FRT3] II	This Study
for RMCE	5549		jsSi1727 [loxP myo-2p FRT nlsCyOFP mex-5p FLP FRT3] I	This Study
for RMCE	5879		jsSi1900 [loxP cup-4p FRT cyOFP mex-5p FLP FRT3] II	This Study
for RMCE	5161		jsTi1453 [loxP rpl-28p FRT GFP-his-58 FRT3] I; bqSi711 [mex-5p FLP sl2 mNG + Cbunc-119(+)] IV	Nonet, 2020
for RMCE	5113	BN711	unc-119(ed3) III; bqSi711 [mex-5p FLP sl2 mNG + Cbunc-119(+)] IV	CGC
genomic DNA	1	N2	wt	CGC
making male strains	117	CB1489	him-8(e1489)	CGC

## Sheet: Methods
NMnumber	Name	Construction
NMp3771	DR274 5’ arm tetO 4X	tetO 4X was amplified from NMp3724 using NMo6575/6668, digested with EcoRI & HindIII, and inserted into similarly digested NMp3055 by ligation. The 7X tetO was truncated to 4X by PCR reaction mediated internal priming within the repeat.
NMp3772	DR274 5’ arm tetO 2X	tetO 2X was amplified from NMp3724 using NMo6575/6668, digested with EcoRI & HindIII, and inserted into similarly digested NMp3055 by ligation. The 7X tetO was truncated to 2X by PCR reaction mediated internal priming within the repeat.
NMp3797	DR274 5’ arm-CT QUAS 5X ∆pes-10	The QUAS 5X ∆pes-10 promoter from NMp3795 was assembled into NMp3698 using a BsaI GG reaction.
NMp3801	pLF3FShC QUAS 5X GFP	The QUAS 5X ∆pes-10 promoter from NMp3797, GFP-C1 from NMp3426, and the tbb-2 3’ UTR from NMp3694 were co-assembled into NMp3643 using a SapI GG reaction.
NMp3848	pLF3FShC2	The hybridized oligonucleotide pair NMo6788/6789 was inserted into SpeI & SbfI digested NMp3643 by ligation.
NMp3851	DR274 AAC TGG rps-13 term	The rps-13 3' UTR was amplified from N2 genomic DNA using NMo6806/6807 and assembled into NMp3844 using a BsaI GG reaction.
NMp3864	pLF3FShC2 rps-13t rab-3pl tetR-L-QF	The rps-13 3' UTR from NMp3851, rab-3 long promoter from NMp3837, tetR-L-QF from NMp3821, and the act-4 3’ UTR from NMp3751 were co-assembled into NMp3848 using a SapI GG reaction.
NMp3905	DR274 5’ arm-CT phat-5p	The phat-5 promoter was amplified from NMp3358 using NMo6907/6908 and assembled into NMp3698 using a BsaI GG reaction.
NMp3907	DR274 SEC-3’ arm act-4 3’ FRT13r	The act-4 3’ UTR was amplified from NMp3864 using NMo6650/6906. This fragment and the hybridized oligonucleotide pair NMo6904/6905 were co-assembled into NMp3702 using a BsaI GG reaction.
NMp3917	pLF3FShC phat-5p tetR-L-QF act-4 3’ FRT1	The phat-5 promoter from NMp3905, tetR-L-QF from NMp3821, and the act-4 3’ UTR from NMp3907 were co-assembled into NMp3643 using a SapI GG reaction.
NMp3947	DR274 5’ arm-CT nhx-2p	The nhx-2 promoter was amplified from N2 genomic DNA using NMo6972/6973 and assembled into NMp3698 using a BsaI GG reaction.
NMp3953	DR274 AAC TGG rps-12p hyg F24 rps13t F13r	The rps-12 promoter was amplified from N2 genomic DNA using NMo6886/6887. The rps-12 3' UTR was amplified from N2 genomic DNA using NMo6888/6889. These two fragments, along with the two hybridized oligonucleotide pairs NMo6968/6969 and NMo6884/6885, were co-assembled into NMp3844 using a BsaI GG reaction.
NMp3978	DR274 FP nls-phiC3	phiCN from NMp3969 and phiCC from NMp3970 were co-assembled into NMp3469 using a BsaI GG reaction.
NMp4004	pLF3FShC2 rps-12p F24 rps-13 F13 tetO 7X	The hybridized oligonucleotide pairs NMo7029/7030 and NMo6786/6787, along with the rps-12 F24 rps-13 integration site from NMp3953, the tetO 7X promoter from NMp3909, GFP-C1 from NMp3426, and the let-858 3’ UTR from NMp3979, were co-assembled into NMp3848 using a SapI GG reaction.
NMp4011	pLF3FShC tetO 2X GFP-C1	tetO 2X from NMp3772, the mec-7 basal promoter from NMp3767, GFP-C1 from NMp3426, and the tbb-2 3’ UTR from NMp3694 were co-assembled into NMp3643 using an LguI GG reaction.
NMp4012	pLF3FShC tetO 4X GFP-C1	tetO 4X from NMp3771, the mec-7 basal promoter from NMp3767, GFP-C1 from NMp3426, and the tbb-2 3’ UTR from NMp3694 were co-assembled into NMp3643 using an LguI GG reaction.
NMp4056	DR274 CT tetO 7X ∆mec-7	The hybridized oligonucleotide pair NMo7064/7065 was inserted into EcoRI & SphI digested NMp3899 by ligation.
NMp4058	pLF3FShC tetO 14X GFP-C1	tetO 7X from NMp3770, the tetO 7X mec-7 basal promoter from NMp4056, GFP-C1 from NMp3426, and the tbb-2 3’ UTR from NMp3694 were co-assembled into NMp3643 using an LguI GG reaction.
NMp4061	DR274 AAC TGG tetO 7X	tetO 7X was amplified from NMp4004 using NMo7073/7075 and assembled into NMp3844 using a BsaI GG reaction.
NMp4062	DR274 AAC CAA tetO 7X	tetO 7X was amplified from NMp4004 using NMo7073/7075 and assembled into NMp3855 using a BsaI GG reaction.
NMp4069	DR274 NT FLP sl2 mNG	FLP sl2 mNG was amplified from NMp3689 using NMo7046/7047, digested with SapI, and inserted into similarly digested NMp3980 by ligation.
NMp4071	pRMHEmB	attB from NMp4065 was digested with BsaI & SpeI and inserted into similarly digested NMp3643 by ligation.
NMp4072	pRMHEmP	attP from NMp4066 was digested with BsaI & SpeI and inserted into similarly digested NMp3643 by ligation.
NMp4073	pLF3FShC2 tetO 21X GFP-C1	tetO 7X from NMp4061, tetO 7X from NMp3770, the tetO 7X mec-7 basal promoter from NMp4056, GFP-C1 from NMp3426, and the tbb-2 3’ UTR from NMp3694 were co-assembled into NMp3848 using an LguI GG reaction.
NMp4075	pRMHEmB mec-4Sp tetR-L-Q	The mec-4 synthetic promoter from NMp3863, tetR-L-QF from NMp3821, and the act-4 3’ UTR from NMp3751 were co-assembled into NMp4071 using a SapI GG reaction.
NMp4077	DR274 5’ arm-CT tetO 1X ∆mec-7	The tetO 1X mec-7 basal promoter was amplified from NMp3899 using NMo7072/7077, DpnI digested, purified, kinased, and religated.
NMp4079	DR274 5’ arm-CT tetO 4X ∆mec-7	The tetO 4X mec-7 basal promoter was amplified from NMp3899 using NMo7072/7077, DpnI digested, purified, kinased, and religated.
NMp4080	pLF3FShC tetO 1X GFP-C1	The tetO 1X mec-7 basal promoter from NMp4077, GFP-C1 from NMp3426, and the tbb-2 3’ UTR from NMp3694 were co-assembled into NMp3643 using a SapI Golden Gate (GG) reaction.
NMp4081	pLF3FShC mex-5p phiC31 sl2 FLP D5 sl2 mNG	The mex-5 promoter from NMp4037, phiC31 from NMp3978, gpd2/3 sl2 from NMp4002, FLP sl2 mNG from NMp4069, and the glh-2 3’ UTR from NMp3981 were co-assembled into NMp3643 using a SapI GG reaction.
NMp4082	pRMHEB	attB was amplified from NMp1668 using NMo7080/7081, digested with AflII & BsiWI, and inserted in similarly digested NMp4071 by ligation.
NMp4085	pRMHEP	attP was amplified from NMp1669 using NMo7082/7083, digested with AgeI & MfeI, and inserted into similarly digested NMp4072 by ligation.
NMp4086	pRMHEB mec-4Sp tetR-L-QF	The mec-4 synthetic promoter from NMp3863, tetR-L-QF from NMp3821, and the act-4 3’ UTR from NMp3751 were co-assembled into NMp4082 using a SapI GG reaction.
NMp4090	pRMHEB ehs-1p tetR-LL-QF act-4 3	The ehs-1 promoter from NMp3896, tetR-LL-QF from NMp4045, and the act-4 3’ UTR from NMp3751 were co-assembled into NMp4082 using a SapI GG reaction.
NMp4091	pRMHEB nhx-2p tetR-LL-QF act-4 3’	The nhx-2 promoter from NMp3947, tetR-LL-QF from NMp4045, and the act-4 3’ UTR from NMp3751 were co-assembled into NMp4082 using a SapI GG reaction.
NMp4092	pRMHEB cup-4p tetR-LL-QF act-4 3’	The cup-4 promoter from NMp3938, tetR-LL-QF from NMp4045, and the act-4 3’ UTR from NMp3751 were co-assembled into NMp4082 using a SapI GG reaction.
NMp4093	pRMHEB myo-2p tetR-LL-QF act-4 3’	The myo-2 promoter from NMp3985, tetR-LL-QF from NMp4045, and the act-4 3’ UTR from NMp3751 were co-assembled into NMp4082 using a SapI GG reaction.
NMp4094	pRMHEB dpy-7p tetR-LL-QF act-4 3’	The dpy-7 promoter from NMp3932, tetR-LL-QF from NMp4045, and the act-4 3’ UTR from NMp3751 were co-assembled into NMp4082 using a SapI GG reaction.
NMp4101	pLF3FShC2 lexO 13X GFP-C	lexO 5X from NMp4099, lexO 5X from NMp3703, the lexO 3X pes-10 basal promoter from NMp4096, GFP-C1 from NMp3426, and the tbb-2 3’ UTR from NMp3694 were co-assembled into NMp3848 using a SapI GG reaction.
NMp4140	DR274 NT nls-scarlet-nls	nls-scarlet-nls was amplified from NMp3911 using NMo6476/7155 and assembled into NMp4134 using a BsaI GG reaction.
NMp4143	pRMHEP tetO 4X TIR1 V2A nls-scarlet	tetO 4X from NMp4079, TIR1 from NMp3460, V2A from NMp4114, nls-scarlet from NMp4140, and the tbb-2 3’ UTR from NMp3777 were co-assembled into NMp4085 using a SapI GG reaction.
NMp4146	DR274 CT ∆mec-7 noATG	The mec-7 basal promoter was amplified from NMp3767 to remove an 'ATG' codon in the far 5' of the basal promoter using NMo7177/7178, DpnI digested, purified, kinased, and religated.
NMp4161	pRMHEB vha-6p tetR-LL-QF	The vha-6 promoter was amplified from N2 genomic DNA using NMo7183/7184. This fragment, the tetR-LL-QF from NMp4045, and the tbb-2 3’ UTR from NMp3694 were co-assembled into NMp4082 using a SapI GG reaction.
NMp4173	pLF3FShC tetO 7X ∆pes-10 ∆mec-7 GFP-C	The tetO 7X pes-10 basal promoter from NMp4145, the mec-7 basal promoter from NMp4146, GFP-C1 from NMp3426, and the tbb-2 3’ UTR from NMp3694 were co-assembled into NMp3643 using a SapI GG reaction.
NMp4177	-4200 DR274 5’ arm tetO 6X	hybridized oligonucleotide pairs NMo7179/7182 and NMo7180/7181 were co-assembled into NMp3467 using a BsaI GG reaction. The oligos contain N so that each plasmids from 4177-4200 contains distinct sequences between each of the tetO sites.
NMp4201	pLF3FShC tetO 6X GFP-C1	tetO 6X from NMp4177-NMp4200, the mec-7 basal promoter from NMp3767, GFP-C1 from NMp3426, and the tbb-2 3’ UTR from NMp3694 were co-assembled into NMp3643 using a SapI GG reaction.
NMp4225	DR274 5’ arm UAS 3X	UAS 3X was amplified from NMp2507 (RK1062) using NMo7206/7207 and assembled into NMp3467 using a BsaI GG reaction.
NMp4236	pLF3FhC UAS 22X ∆pes-10 GFP-C1	UAS 11X from NMp3700, the UAS 11X pes-10 basal promoter rom NMp4232, GFP-C1 from NMp3426, and the tbb-2 3’ UTR from NMp3694 were co-assembled into NMp3643 using an LguI GG reaction.
NMp4237	pLF3FShC UAS 3X ∆pes-10 GFP-C1	UAS 5X from NMp4225, the pes-10 basal promoter from NMp3706, GFP-C1 from NMp3426, and the tbb-2 3’ UTR from NMp3694 were co-assembled into NMp3643 using an LguI GG reaction.
NMp4238	pLF3FShC UAS 14X ∆pes-10 GFP-C1	UAS 3X from NMp4225, the UAS 11X pes-10 basal promoter from NMp4232, GFP-C1 from NMp3426, and the tbb-2 3’ UTR from NMp3694 were co-assembled into NMp3643 using an LguI GG reaction.
NMp4251	pRMHEP tetO 4X GFP1-10 sl2 scarlet	tetO 4X from NMp4079, GFP1-10 from NMp4233, sl2 from NMp3928, scarlet from NMp3911, and the tbb-2 3’ UTR from NMp3777 were co-assembled into NMp4085 using an LguI GG reaction.
NMp4271	DR274 AAC TGG tetO 6X	tetO 6X was amplified from a mix of NMp4201-4214 using NMo7250/7252, purified, and assembled into NMp3844 using a BsaI GG reaction.
NMp4273	DR274 CAA TGG tetO 6X	tetO 6X was amplified from a mix of NMp4201-4214 using NMo7248/7249, purified, and assembled into NMp3854 using a BsaI GG reaction.
NMp4275	DR274 AAC CAA tetO 6X	tetO 6X was amplified from a mix of NMp4201-4214 using NMo7250/7251, purified, and assembled into NMp3855 using a BsaI GG reaction.
NMp4276	pLF3FShC2 tetO 12X GFP-C1	tetO 6X from NMp4271, tetO 6X from NMp4191, the mec-7 basal promoter from NMp3767, GFP-C1 from NMp3426, and the tbb-2 3’ UTR from NMp3694 were co-assembled into NMp3848 using a SapI GG reaction.
NMp4277	pLF3FShC2 tetO 18X GFP-C1	tetO 6X from NMp4273, tetO 6X from NMp4275, tetO 6X from NMp4191, the mec-7 basal promoter from NMp3767, GFP-C1 from NMp3426, and the tbb-2 3’ UTR from NMp3694 were co-assembled into NMp3848 using a SapI GG reaction.
NMp4314	DR274 SEC-3’ arm rps-2 3’	The rps-2 3’ UTR was amplified from N2 genomic DNA using NMo7282/7283 and assembled into NMp3702 using a BsaI GG reaction.
NMp4334	DR274 AAC CAA QUAS 5X	QUAS 5X was amplified from NMp3801 using NMo7312/7313 and assembled into NMp3855 using a BsaI GG reaction.
NMp4335	DR274 AAC TGG QUAS 5X	QUAS 5X was amplified from NMp3801 using NMo7312/7315 and assembled into NMp3844 using a BsaI GG reaction.
NMp4336	DR274 CAA TGG QUAS 5X	QUAS 5X was amplified from NMp3801 using NMo7314/7315, purified, and assembled into NMp3854 using a BsaI GG reaction.
NMp4337	DR274 CT lexO 8X ∆pes-10	The lexO 8X pes-10 basal promoter was amplified from NMp4100 using NMo6594/7307, purified, and assembled into NMp3468 using a BsaI GG reaction.
NMp4345	DR274 CT UAS 3X ∆pes-10	The UAS 3X pes-10 basal promoter was amplified from NMp4237 using NMo6594/7207 and assembled into NMp3468 using a BsaI GG reaction.
NMp4355	pLF3FShCmP	A minimal attP site was amplified from NMp4072 using NMo6682/7329, purified, and digested with SalI & SbfI. The large insert from NMp3643 was similarly digested and inserted by ligation.
NMp4356	pLF3FShC UAS 6X GFP-C1	UAS 3X from NMp4225, the UAS 3X pes-10 basal promoter from NMp4345, GFP-C1 from NMp3426, and the tbb-2 3’ UTR from NMp3694 were co-assembled into NMp3643 using an LguI GG reaction.
NMp4357	pLF3FShC QUAS 10X GFP-C1	QUAS 5X from NMp3704, the QUAS 5X pes-10 basal promoter from NMp4341, GFP-C1 from NMp3426, and the tbb-2 3’ UTR from NMp3694 were co-assembled into NMp3643 using an LguI GG reaction.
NMp4358	pLF3FShC2 QUAS 15X GFP-C1	QUAS 5X from NMp3704, QUAS 5X from NMp4335, the QUAS 5X pes-10 basal promoter from NMp4341, GFP-C1 from NMp3426, and the tbb-2 3’ UTR from NMp3694 were co-assembled into NMp3848 using an LguI GG reaction.
NMp4359	pLF3FShC2 QUAS 20X GFP-C1	QUAS 5X from NMp4334, QUAS 5X from NMp4336, QUAS 5X from NMp3704, the QUAS 5X pes-10 basal promoter from NMp4341, GFP-C1 from NMp3426, and the tbb-2 3’ UTR from NMp3694 were co-assembled into NMp3848 using an LguI GG reaction.
NMp4364	pLF3FShC2 lexO 18X GFP-C1	lexO 5X from NMp4099, lexO 5X from NMp3703, the lexO 8X pes-10 basal promoter from NMp4337, GFP-C1 from NMp3426, and the tbb-2 3’ UTR from NMp3694 were co-assembled into NMp3848 using an LguI GG reaction.
NMp4377	DR274 5’ arm promRand1	A random 400bp AT-rich sequence from NMp4366 was assembled into NMp3467 using a BsaI GG reaction.
NMp4378	DR274 5’ arm promRand2	A random 400bp AT-rich sequence from NMp4367 was assembled into NMp3467 using a BsaI GG reaction.
NMp4379	DR274 5’ arm promRand3	A random 400bp AT-rich sequence from NMp4368 was assembled into NMp3467 using a BsaI GG reaction.
NMp4381	DR274 CT p200-1	A 200bp random AT-rich sequence from NMp4370 was assembled into NMp3468 using a BsaI GG reaction.
NMp4382	DR274 CT p200-2	A 200bp random AT-rich sequence from NMp4370 was assembled into NMp3468 using a BsaI GG reaction.
NMp4383	DR274 CT p200-3	A 200bp random AT-rich sequence from NMp4371 was assembled into NMp3468 using a BsaI GG reaction.
NMp4391	pLF3FShCmP tetO 7X p200-1 GFP-C1	tetO 7X from NMp3770, a 200bp AT-rich random promoter from NMp4381, GFP-C1 from NMp3426, and the tbb-2 3’ UTR from NMp3694 were co-assembled into NMp4355 using an LguI GG reaction.
NMp4392	pLF3FShCmP tetO 7X p200-2 GFP-C1	tetO 7X from NMp3770, a 200bp AT-rich random promoter from NMp4382, GFP-C1 from NMp3426, and the tbb-2 3’ UTR from NMp3694 were co-assembled into NMp4355 using an LguI GG reaction.
NMp4393	pLF3FShCmP tetO 7X p200-3 GFP-C1	tetO 7X from NMp3770, a 200bp AT-rich random promoter from NMp4383, GFP-C1 from NMp3426, and the tbb-2 3’ UTR from NMp3694 were co-assembled into NMp4355 using an LguI GG reaction.
NMp4409	DR274 5’ arm ICAN	A 900bp PATC-rich sequence from an F54A3 intron was amplified from N2 genomic DNA using NMo7352/7353 and assembled into NMp3467 using a BsaI GG reaction.
NMp4421	pLF3FShC2 tetO 7X 400R1 ∆mec-7 GFP-C1	tetO 7X from NMp4061, the 400bp AT-rich random sequence from NMp4377, the mec-7 basal promoter from NMp3767, GFP-C1 from NMp3426, and the tbb-2 3’ UTR from NMp3694 were co-assembled into NMp3848 using an LguI GG reaction.
NMp4423	pLF3FShC2 tetO 7X 400R3 ∆mec-7 GFP-C1	tetO 7X from NMp4061, the 400bp AT-rich random sequence from NMp4379, the mec-7 basal promoter from NMp3767, GFP-C1 from NMp3426, and the tbb-2 3’ UTR from NMp3694 were co-assembled into NMp3848 using an LguI GG reaction.
NMp4424	pLF3FShC2 tetO 7X 900 PATC ∆mec-7 GFP-C1	tetO 7X from NMp4061, a 900 bp PATC-rich sequence from NMp4410, the mec-7 basal promoter from NMp3767, GFP-C1 from NMp3426, and the tbb-2 3’ UTR from NMp3694 were co-assembled into NMp3848 using an LguI GG reaction.
NMp4452	DR274 CT ∆act-4	The act-4 basal promoter was amplified from N2 genomic DNA using NMo7372/7373, purified, and assembled into NMp3468 using a BsaI GG reaction.
NMp4453	DR274 CT ∆pals-5	The pals-5 basal promoter was amplified from N2 genomic DNA using NMo7374/7375, purified, and assembled into NMp3468 using a BsaI GG reaction.
NMp4454	DR274 CT ∆tbb-2	The tbb-2 basal promoter was amplified from N2 genomic DNA using NMo7376/7377, purified, and assembled into NMp3468 using a BsaI GG reaction.
NMp4476	DR274 CT ∆lys-8	The lys-8 basal promoter was amplified from N2 genomic DNA using NMo7392/7393 and assembled into NMp3468 using a BsaI GG reaction.
NMp4481	pHygG2r attPf	attP was amplified from NMp4085 using NMo7385/7386 and assembled into pHygG2r, which was amplified from NMp4404 using NMo7264/7265, using a BsaI GG reaction.
NMp4483	pHygRP3	attP from NMp4085 was digested with EcoRV & NotI and inserted into similarly digested NMp4428 by ligation.
NMp4484	pHygGP7	attP from NMp4085 was digested with EcoRV & NotI and inserted into similarly digested NMp4432 by ligation.
NMp4487	pHygR3 tetO 7X ∆act-4 GFP-C1	tetO 7X from NMp3770, the act-4 basal promoter from NMp4452, GFP-C1 from NMp3426, and the tbb-2 3’ UTR from NMp3694 were co-assembled into NMp4428 using an LguI GG reaction.
NMp4488	pHygR3 tetO 7X ∆pals-5 GFP-C1	tetO 7X from NMp3770, the pals-5 basal promoter from NMp4453, GFP-C1 from NMp3426, and the tbb-2 3’ UTR from NMp3694 were co-assembled into NMp4428 using an LguI GG reaction.
NMp4489	pHygR3 tetO 7X ∆tbb-2 GFP-C1	tetO 7X from NMp3770, the tbb-2 basal promoter from NMp4454, GFP-C1 from NMp3426, and the tbb-2 3’ UTR from NMp3694 were co-assembled into NMp4428 using an LguI GG reaction.
NMp4490	pHygR3 tetO 7X ∆lys-8 GFP-C1	tetO 7X from NMp3770, the lys-8 basal promoter from NMp4476, GFP-C1 from NMp3426, and the tbb-2 3’ UTR from NMp3694 were co-assembled into NMp4428 using an LguI GG reaction.
NMp4574	pHygGB6
NMp4575	pHygGP6	The attP region from NMp4484 was digested with EcoO109I & SpeI and inserted into similarly digested NMp4481 by ligation.
NMp4579	pHygRP2	The attP region from NMp4483 was digested with SpeI & XhoI and inserted into similarly digested NMp4388 by ligation.
NMp4591	pHygGP16	The hybridized oligonucleotides NMo6788/6789 were inserted in AvrII & XhoI digested NMp4575 by ligation.
NMp4635	DR274 5’ arm tetOA 4X	tetOA 4X from NMp4624 was assembled into NMp3467 using a BsaI GG reaction.
NMp4635	DR274 5’ arm tetOA 4X	tetOA 4X from NMp4624 was assembled into NMp3467 using a BsaI GG reaction.
NMp4636	DR274 5’ arm tetOB 4X	tetOB 4X from NMp4625 was assembled into NMp3467 using a BsaI GG reaction.
NMp4637	DR274 5’ arm tetOC 4X	tetOC 4X from NMp4626 was assembled into NMp3467 using a BsaI GG reaction.
NMp4638	DR274 5’ arm tetOD 4X	tetOD 4X from NMp4627 was assembled into NMp3467 using a BsaI GG reaction.
NMp4639	DR274 CAA TGG lexO 6X	lexO 6X from NMp4625 was assembled into NMp3854 using a BsaI GG reaction.
NMp4640	DR274 AAC CAA lexO 6X	lexO 6X from NMp4626 was assembled into NMp3855 using a BsaI GG reaction.
NMp4648	DR274 5’ arm lexO 6X	lexO 3X from NMp4624 and lexO 3X from NMp4627 were co-assembled into NMp3467 using a BsaI GG reaction.
NMp4651	pHygR2 tetOA 4X mNG	tetOA 4X from NMp4635, the mec-7 basal promoter from NMp3767, mNG from NMp3699, and the tbb-2 3’ UTR from NMp3694 were co-assembled into NMp4388 using an LguI GG reaction.
NMp4652	pHygR2 tetOD 4X mNG	tetOD 4X from NMp4638, the mec-7 basal promoter from NMp3767, mNG from NMp3699, and the tbb-2 3’ UTR from NMp3694 were co-assembled into NMp4388 using an LguI GG reaction.
NMp4657	pHygR2 tetOB 4X mNG	tetOB 4X from NMp4636, the mec-7 basal promoter from NMp3767, mNG from NMp3699, and the tbb-2 3’ UTR from NMp3694 were co-assembled into NMp4388 using an LguI GG reaction.
NMp4658	pHygR2 tetOC 4X mNG	tetOC 4X from NMp4637, the mec-7 basal promoter from NMp3767, mNG from NMp3699, and the tbb-2 3’ UTR from NMp3694 were co-assembled into NMp4388 using an LguI GG reaction.
NMp4661	DR274 AAC TGG lexO 6X	NMp4639 was amplified with NMo7475/7476, DpnI digested, and religated.
NMp4669	pHygGP16 lexO 18X mNG	lexO 6X from NMp4640, lexO 6X from NMp4639, lexO 6X from NMp4648, the pes-10 basal promoter from NMp3706, mNG from NMp3699, and the tbb-2 3’ UTR from NMp3694 were co-assembled into NMp4591 using an LguI GG reaction.
NMp4674	pHygGP6 lexO 6X mNG	lexO 6X from NMp4648, the pes-10 basal promoter from NMp3706, mNG from NMp3699, and the tbb-2 3’ UTR from NMp3694 were co-assembled into NMp4575 using an LguI GG reaction.
NMp4713	DR274 CAA TGG 18sp	A 1.8kb PATC rich sequence was amplified from N2 genomic DNA using NMo7519/7520 and assembled into NMp3854 using a BsaI GG reaction.
NMp4714	DR274 5’ arm 13sp	A 1.3kb PATC rich sequence was amplified from N2 genomic DNA using NMo7521/7522 and assembled into NMp3467 using a BsaI GG reaction.
NMp4717	pHygGP6 lexO 12X mNG	lexO 6X from NMp4661, lexO 6X from NMp4648, the pes-10 basal promoter from NMp3706, mNG from NMp3699, and the tbb-2 3’ UTR from NMp3694 were co-assembled into NMp4591 using an LguI GG reaction.
NMp4721	pHygG12 tetO 7X 04sp ∆mec-7 GFP tbb-2 3’	tetO 7X from NMp4061, the 400bp AT-rich random sequence from NMp4379, the mec-7 basal promoter from NMp3767, GFP-C1 from NMp3426, and the tbb-2 3’ UTR from NMp3694 were co-assembled into NMp4613 using an LguI GG reaction.
NMp4731	pHygG12 tetO 7X 13sp ∆mec-7 GFP tbb-2 3’	tetO 7X from NMp4061, a 1.3kb spacer from NMp4714, the mec-7 basal promoter from NMp3767, GFP-C1 from NMp3426, and the tbb-2 3’ UTR from NMp3694 were co-assembled into NMp4613 using an LguI GG reaction.
NMp4732	pHygG12 tetO 7X 18sp 13sp ∆mec-7 GFP tbb-2 3’	tetO 7X from NMp4062, a 1.8kb spacer from NMp4713, a 1.3kb spacer from NMp4714, the mec-7 basal promoter from NMp3767, GFP-C1 from NMp3426, and the tbb-2 3’ UTR from NMp3694 were co-assembled into NMp4613 using an LguI GG reaction.
NMp4733	pHygG12 tetO 7X 18sp 04sp ∆mec-7 GFP tbb-2 3’	tetO 7X from NMp4062, a 1.8kb spacer from NMp4713, the 400bp AT-rich random sequence from NMp4378, the mec-7 basal promoter from NMp3767, GFP-C1 from NMp3426, and the tbb-2 3’ UTR from NMp3694 were co-assembled into NMp4613 using an LguI GG reaction.
NMp4740	DR274 5’ arm tetO 13X	tetO 13X from NMp4734 was assembled into NMp3467 using a BsaI GG reaction.
NMp4741	DR274 5' arm lexO 13X	lexO 13X from NMp4735 was assembled into NMp3467 using a BsaI GG reaction.
NMp4742	DR274 5' arm QUAS 13X	QUAS 13X from NMp4736 was assembled into NMp3467 using a BsaI GG reaction.
NMp4754	pHygGB6 13X lexO mec-7bp mNG	lexO 13X from NMp4741, the mec-7 basal promoter from NMp3767, mNG from NMp3699, and the tbb-2 3’ UTR from NMp3694 were co-assembled into NMp4574 using an LguI GG reaction.
NMp4755	pHygGB6 QUAS 13X mec-7bp mNG	QUAS 13X from NMp4742, the mec-7 basal promoter from NMp3767, mNG from NMp3699, and the tbb-2 3’ UTR from NMp3694 were co-assembled into NMp4574 using an LguI GG reaction.
NMp4756	pHygR2 TGG GTA ∆mec-7 nls-GFP	The mec-7 basal promoter nls-GFP fragment was amplified from NMp4004 using NMo7567/7568, digested with XmaI, and inserted into MscI & XmaI digested NMp4651 by ligation.
NMp4765	DR274 SEC-3’ arm ter222	The tbb-2 3’ UTR was amplified from NMp4721 using NMo7573/7574. The rpl-2 3’ UTR was amplified from N2 genomic DNA using NMo7575/7576. The rps-2 3’ UTR was amplified from N2 genomic DNA using NMo7283/7577. All three fragments were co-assembled into NMp3702 using a BsaI GG reaction.
NMp4766	DR274 5’ arm nls-scarlet tbb-2 rev	The nls-scarlet tbb-2 3' UTR fragment was amplified from NMp4143 using NMo7578/7579 and assembled into NMp3467 using a BsaI GG reaction.
NMp4775	pHygR2 tbb-2 3' m7bp nls GF	The tbb-2 3’ UTR from NMp3694 and a small double stranded (ds) oligonucleotide spacer made from hybridized oligos NMo7580/7581 were co-assembled into NMp4756 using an LguI GG reaction.
NMp4777	DR274 TGG AAG promRand3	NMp4379 was amplified with NMo7582/7583, DpnI digested, purified, kinased, and religated.
NMp4782	pHygGP6 nls-scarlet tetO 7X nls-GFP	nls-scarlet from NMp4766, tetO 7X mec-7 basal promoter from NMp4056, nls-GFP from NMp4064, and the let-858 3’ UTR from NMp3766 were co-assembled into NMp4575 using an LguI GG reaction.
NMp4797	DR274 SEC-3’ arm rps-0 3’	The rps-0 3’ UTR was amplified from N2 genomic DNA using NMo7592/7593 and assembled into NMp3702 using a BsaI GG reaction.
NMp4804	DR274 CT ∆act-4.2	An act-4 basal promoter fragment was amplified from NMp4487 using NMo7373/7612, purified, and assembled into NMp3468 using a BsaI GG reaction.
NMp4805	DR274 CT ∆act-4.3	An act-4 basal promoter fragment was amplified from NMp4487 using NMo7373/7613, purified, and assembled into NMp3468 using a BsaI GG reaction.
NMp4806	DR274 CT ∆act-4.4	An act-4 basal promoter fragment was amplified from NMp4487 using NMo7373/7614, purified, and assembled into NMp3468 using a BsaI GG reaction.
NMp4807	DR274 CT ∆tbb-2.2	A tbb-2 basal promoter fragment was amplified from N2 genomic DNA using NMo7377/7616, purified, and assembled into NMp3468 using a BsaI GG reaction.
NMp4808	DR274 CT ∆lys-8.2	A lys-8 basal promoter fragment was amplified from N2 genomic DNA using NMo7377/7615, purified, and inserted into NMp3468 using a BsaI GG reaction.
NMp4809	pHygR2 R400 unc-54 3' m7bp nls-GFP	A random 400bp AT-rich spacer from NMp4777 and the unc-54 3’ UTR from NMp3760 were co-assembled into NMp4756 using an LguI GG reaction.
NMp4810	pHygR2 R400 act-4 3' m7bp nls-GFP	A random 400bp AT-rich spacer from NMp4777 and the act-4 3’ UTR from NMp3751 were co-assembled into NMp4756 using an LguI GG reaction.
NMp4811	pHygR2 R400 rps-2 3' m7bp nls-GFP	A random 400bp AT-rich spacer from NMp4777 and the rps-2 3’ UTR from NMp4314 were co-assembled into NMp4756 using an LguI GG reaction.
NMp4812	pHygR2 R400 let-858 3' m7bp nls-GFP	A random 400bp AT-rich spacer from NMp4777 and the let-858 3’ UTR from NMp3766 were co-assembled into NMp4756 using an LguI GG reaction.
NMp4825	pHygR2 R400 tbb-2 3' m7bp nls-GFP	A random 400bp AT-rich spacer from NMp4777 and the tbb-2 3’ UTR from NMp3694 were co-assembled into NMp4756 using an LguI GG reaction.
NMp4828	pHygR2 tetO 7X ∆act-4.2 GFP tbb-2 3’	tetO 7X from NMp3770, an act-4 basal promoter from NMp4804, GFP from NMp3426, and the tbb-2 3’ UTR from NMp3694 were co-assembled into NMp4388 using an LguI GG reaction.
NMp4829	pHygR2 tetO 7X ∆act-4.3 GFP tbb-2 3’	tetO 7X from NMp3770, an act-4 basal promoter from NMp4805, GFP from NMp3426, and the tbb-2 3’ UTR from NMp3694 were co-assembled into NMp4388 using an LguI GG reaction.
NMp4830	pHygR2 tetO 7X ∆act-4.4 GFP tbb-2 3’	tetO 7X from NMp3770, an act-4 basal promoter from NMp4806, GFP from NMp3426, and the tbb-2 3’ UTR from NMp3694 were co-assembled into NMp4388 using an LguI GG reaction.
NMp4831	pHygR2 tetO 7X ∆tbb-2.2 GFP tbb-2 3’	tetO 7X from NMp3770, a tbb-2 basal promoter from NMp4807, GFP from NMp3426, and the tbb-2 3’ UTR from NMp3694 were co-assembled into NMp4388 using an LguI GG reaction.
NMp4832	pHygR2 tetO 7X ∆lys-8.2 GFP tbb-2 3’	tetO 7X from NMp3770, a lys-8 basal promoter from NMp4808, GFP from NMp3426, and the tbb-2 3’ UTR from NMp3694 were co-assembled into NMp4388 using an LguI GG reaction.
NMp4833	pHygR2 tetO 7X ∆act-4 GFP let-858 3’	tetO 7X from NMp3770, the act-4 basal promoter from NMp4452, GFP from NMp3426, and the let-858 3’ UTR from NMp3766 were co-assembled into NMp4388 using an LguI GG reaction.
NMp4837	pHygG6 TGG GTA sl2 mNG glh-2 3'	The gpd2 mNG glh-2 3' UTR fragment was amplified from NMp4081 using NMo6565/7617, digested with SphI & XmaI, and inserted into similarly digested NMp4441 by ligation.
NMp4838	pHygG6 TGG GTA sl2 Scarlet tbb-2 3'	The gpd2 scarlet tbb-2 3' UTR fragment was amplified from NMp4251 using NMo6565/7617, digested with SphI & XmaI, and inserted into similarly digested NMp4441 by ligation.
NMp4839	pHygG6 tetO 7X ∆mec-7p Scarlet unc-54 sl2 mNG glh-2 3’	The tetO 7X mec-7 basal promoter from NMp3899, scarlet from NMp4137, and the unc-54 3’ UTR from NMp3760 were co-assembled into NMp4837 using an LguI GG reaction.
NMp4840	pHygG6 tetO 7X ∆mec-7p Scarlet let-858 sl2 mNG glh-2 3’	The tetO 7X mec-7 basal promoter from NMp4899, scarlet from NMp4137, and the let-858 3’ UTR from NMp3766 were co-assembled into NMp4837 using an LguI GG reaction.
NMp4841	pHygG6 tetO 7X ∆mec-7 scarlet tbb-2 3’ sl2 mNG glh-2 3’	The tetO 7X mec-7 basal promoter from NMp3899, scarlet from NMp4137, and the tbb-2 3’ UTR from NMp3694 were co-assembled into NMp4837 using an LguI GG reaction.
NMp4842	pHygG6 tetO 7X ∆pes-10p Scarlet unc-54 sl2 mNG glh-2 3’	The tetO 7X pes-10 basal promoter from NMp3695, scarlet from NMp4137, and the unc-54 3’ UTR from NMp3760 were co-assembled into NMp4837 using an LguI GG reaction.
NMp4843	pHygG6 tetO 7X p10bp Scarlet let-858 sl2 mNG glh-2 3’	The tetO 7X pes-10 basal promoter from NMp3695, scarlet from NMp4137, and the let-858 3’ UTR from NMp3766 were co-assembled into NMp4837 using an LguI GG reaction.
NMp4864	pHygR2 R400 QFAD m7bp nlsGFP	A random 400bp AT-rich spacer from NMp4777 and the QF activation domain amplified from NMp4045 using NMo7631/7632 were co-assembled into NMp4756 using an LguI GG reaction.
NMp4867	DR274 5’ arm tetO 13-33	tetO 13X-33 from NMp4856 was assembled into NMp3467 using a BsaI GG reaction.
NMp4868	DR274 5’ arm tetO 13-37	tetO 13X-37 from NMp4857 was assembled into NMp3467 using a BsaI GG reaction.
NMp4869	DR274 5’ arm tetO 13-40	tetO 13X-40 from NMp4858 was assembled into NMp3467 using a BsaI GG reaction.
NMp4873	DR274 SEC-3’ arm ubl-1 3’	The ubl-1 3’ UTR was amplified from N2 genomic DNA using NMo7646/7647, purified, and assembled into NMp3702 using a BsaI GG reaction.
NMp4876	pHygGP6 tetO 13X-33 mNG	tetO 13X-33 from NMp4867, the mec-7 basal promoter from NMp3767, mNG from NMp3699, and the tbb-2 3’ UTR from NMp3694 were co-assembled into NMp4575 using an LguI GG reaction.
NMp4877	pHygGP6 tetO 13X-37 mNG	tetO 13X-37 from NMp4868, the mec-7 basal promoter from NMp3767, mNG from NMp3699, and the tbb-2 3’ UTR from NMp3694 were co-assembled into NMp4575 using an LguI GG reaction.
NMp4878	pHygGP6 tetO 13X-40 mNG	tetO 13X-40 from NMp4869, the mec-7 basal promoter from NMp3767, mNG from NMp3699, and the tbb-2 3’ UTR from NMp3694 were co-assembled into NMp4575 using an LguI GG reaction.
NMp4879	DR274 SEC-3’ arm rps-9 3’	The rps-9 3’ UTR was amplified from N2 genomic DNA using NMo7644/7645, purified, and assembled into NMp3702 using a BsaI GG reaction.
NMp4880	DR274 SEC-3’ arm eef-2 3’	The eef-2 3’ UTR was amplified from N2 genomic DNA using NMo7648/7649, purified, and assembled into NMp3702 using a BsaI GG reaction.
NMp4881	pHygGP6 tetO 13X-43 mNG	tetO 13X-43 from NMp4740, the mec-7 basal promoter from NMp3767, mNG from NMp3699, and the tbb-2 3’ UTR from NMp3694 were co-assembled into NMp4575 using an LguI GG reaction.
NMp4892	pHygR2 R400 rps-0 3' m7bp nls-GFP	A random 400bp AT-rich spacer from NMp4777 and the rps-0 3’ UTR from NMp4797 were co-assembled into NMp4756 using an LguI GG reaction.
NMp4894	pHygR2 R400 glh-2 3' m7bp nls-GFP	A random 400bp AT-rich spacer from NMp4777 and the glh-2 3’ UTR from NMp4215 were co-assembled into NMp4756 using an LguI GG reaction.
NMp4896	pHygR2 R400 rps-9 3' m7bp nls-GFP	A random 400bp AT-rich spacer from NMp4777 and the ubl-1 3’ UTR from NMp4873 were co-assembled into NMp4756 using an LguI GG reaction.
NMp4898	pHygR2 R400 rps-9 3' m7bp nls-GFP	A random 400bp AT-rich spacer from NMp4777 and the rps-9 3’ UTR from NMp4879 were co-assembled into NMp4756 using an LguI GG reaction.
NMp4899	pHygR2 R400 eef-2 3' m7bp nls-GFP	A random 400bp AT-rich spacer from NMp4777 and the eef-2 3’ UTR from NMp4880 were co-assembled into NMp4756 using an LguI GG reaction.
NMp4900	pHygR2 R400 ter222 m7bp nls-GFP	A random 400bp AT-rich spacer from NMp4777 and the ter-222 3’ UTR from NMp4765 were co-assembled into NMp4756 using an LguI GG reaction.
NMp4935	pHygG6 tetO 7X ∆pes-10p mNG glh-2 3' gpd2 scarlet tbb-2 3’	The tetO 7X pes-10 basal promoter from NMp3695, mNG from NMp3699, and the glh-2 3’ UTR from NMp4215 were co-assembled into NMp4838 using an LguI GG reaction.
NMp4938	pHygG6 tetO 7X ∆pes-10p scarlet rps-0 3' sl2 mNG glh-2 3’	The tetO 7X pes-10 basal promoter from NMp3695, scarlet from NMp4137, and the rps-0 3’ UTR from NMp4797 were co-assembled into NMp4837 using an LguI GG reaction.
NMp4939	pHygG6 tetO 7X ∆pes-10p scarlet glh-2 3' sl2 mNG glh-2 3’	The tetO 7X pes-10 basal promoter from NMp3695, scarlet from NMp4137, and the glh-2 3’ UTR from NMp4215 were co-assembled into NMp4837 using an LguI GG reaction.
NMp4952	pHygG6 tetO 7X ∆pes-10 scarlet eef-2 3' gpd2 mNG glh-2 3’	The tetO 7X pes-10 basal promoter from NMp3695, scarlet from NMp4137, and the eef-2 3’ UTR from NMp4880 were co-assembled into NMp4837 using an LguI GG reaction.
NMp4953	pHygG6 tetO 7X ∆pes-10 scarlet act-4 3' gpd2 mNG glh-2 3’	The tetO 7X pes-10 basal promoter from NMp3695, scarlet from NMp4137, and the act-4 3’ UTR from NMp3751 were co-assembled into NMp4837 using an LguI GG reaction.
NMp4954	pHygG6 tetO 7X ∆pes-10 scarlet rps-9 3' gpd2 mNG glh-2 3’	The tetO 7X pes-10 basal promoter from NMp3695, scarlet from NMp4137, and the rps-9 3’ UTR from NMp4879 were co-assembled into NMp4837 using an LguI GG reaction.
NMp4955	pHygG6 tetO 7X ∆pes-10 scarlet ter222 gpd2 mNG glh-2 3’	The tetO 7X pes-10 basal promoter from NMp3695, scarlet from NMp4137, and the ter-222 3’ UTR from NMp4765 were co-assembled into NMp4837 using an LguI GG reaction.
NMp4956	pHygG6 tetO 7X ∆pes-10 scarlet ubl-1 3' gpd2 mNG glh-2 3'	The tetO 7X pes-10 basal promoter from NMp3695, scarlet from NMp4137, and the ubl-1 3’ UTR from NMp4873 were co-assembled into NMp4837 using an LguI GG reaction.
NMp5030	DR274 5’ arm-CT tetO 7X Kozak	The tetO 7X Kozak 'promoter' was amplified from NMp3770 using NMo7772/7773, DpnI digested, purified, kinased, and religated.
NMp5031	DR274 5’ arm-CT tetO 7X ts Kozak	The tetO 7X ts Kozak 'promoter' was amplified from NMp3770 using NMo7772/7774, DpnI digested, purified, kinased, and religated.
NMp5034	pHygRP2 tetO 7X Kozak GFP tbb-2 3’	The tetO 7X Kozak 'promoter' from NMp5030, GFP from NMp3426, and the tbb-2 3’ UTR from NMp3694 were co-assembled into NMp4579 using an LguI GG reaction.
NMp5035	pHygRP2 tetO 7X ts Kozak GFP tbb-2 3’	The tetO 7X ts Kozak 'promoter' from NMp5031, GFP from NMp3426, and the tbb-2 3’ UTR from NMp3694 were co-assembled into NMp4579 using an LguI GG reaction.
