# Supplementary material
Source: publisher figshare collection journal article supplement (https://gsajournals.figshare.com/articles/dataset/_/28824782)

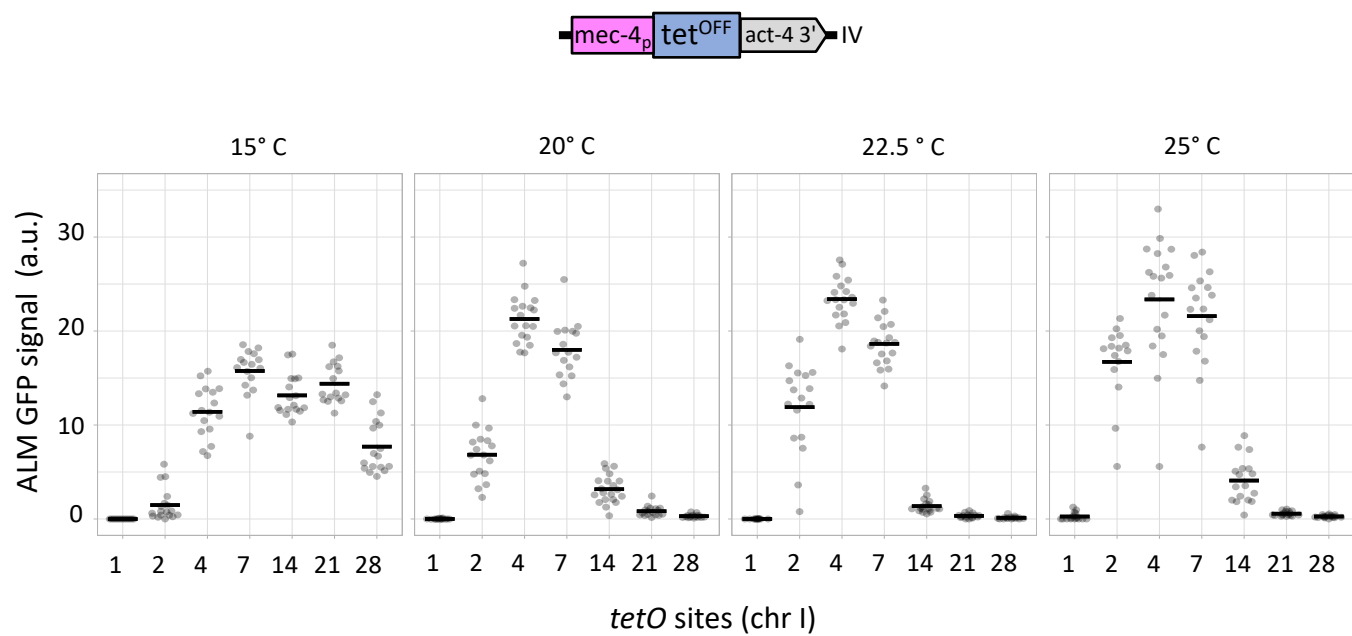

Figure S1

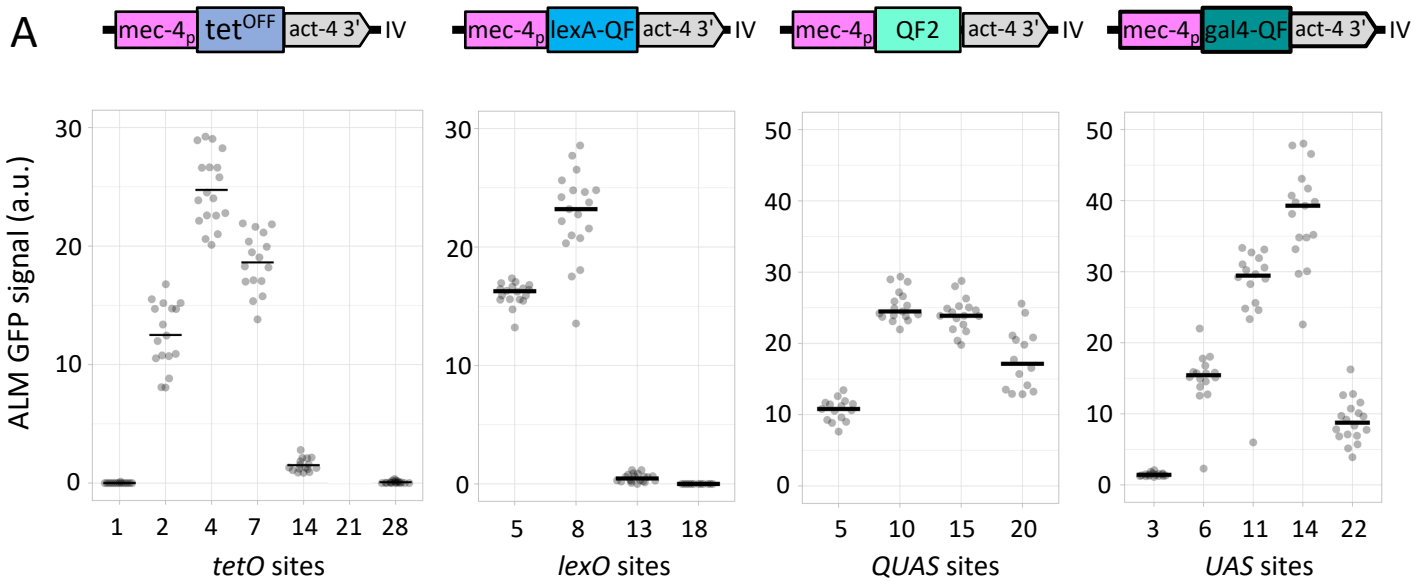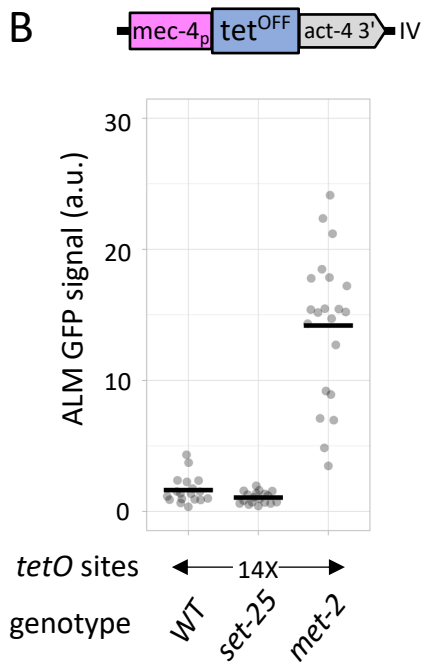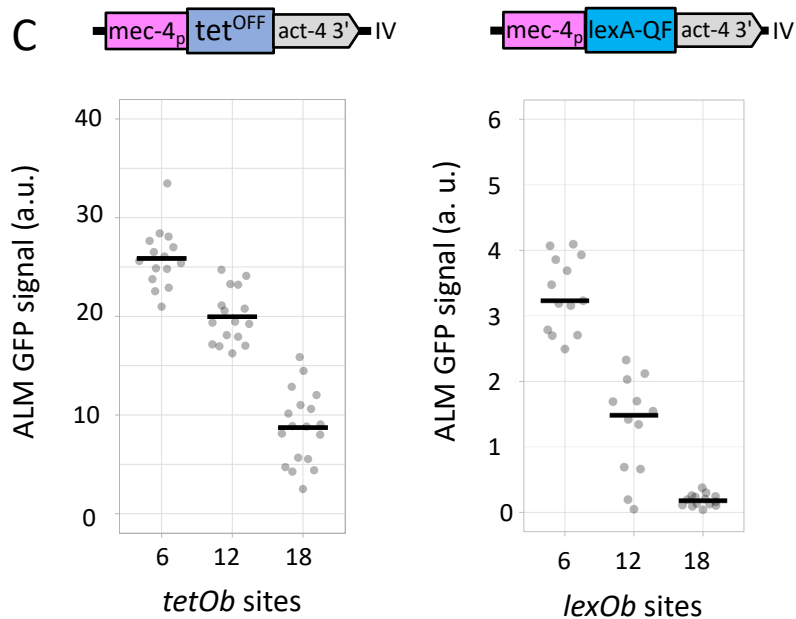

Figure S2

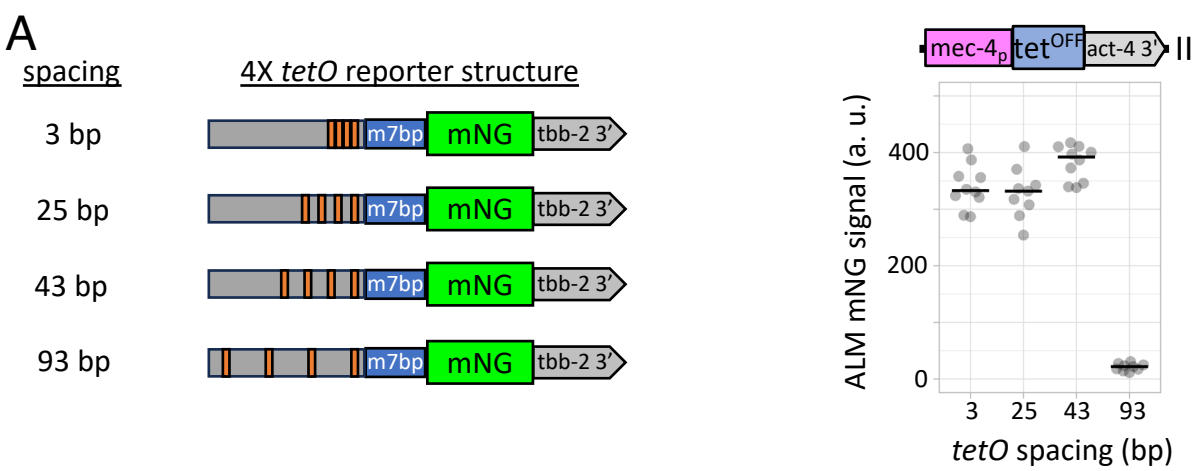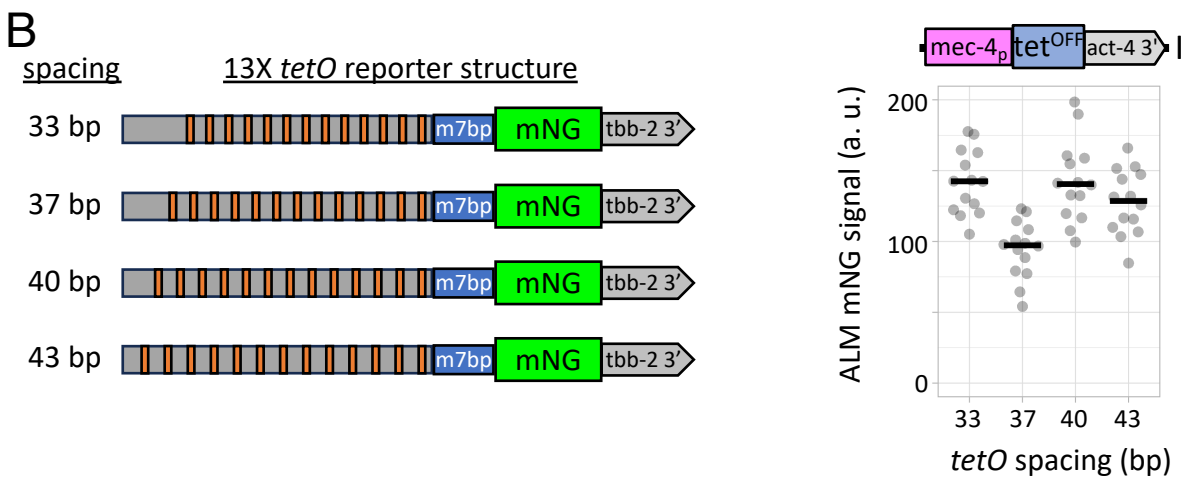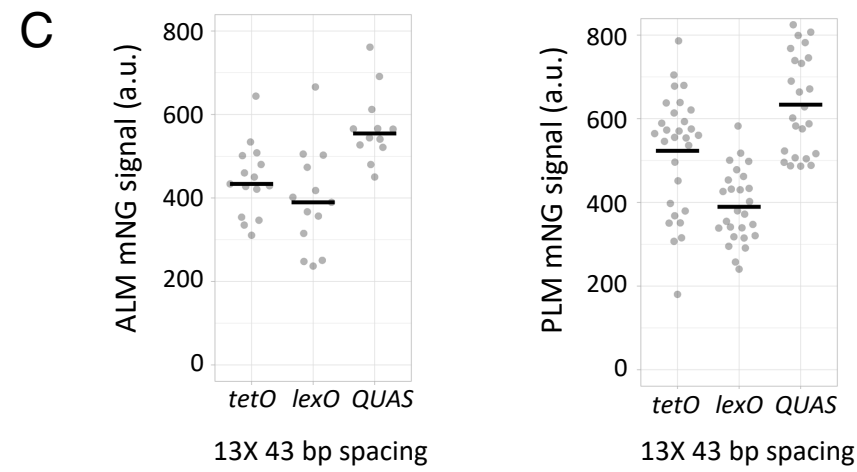

Figure S3

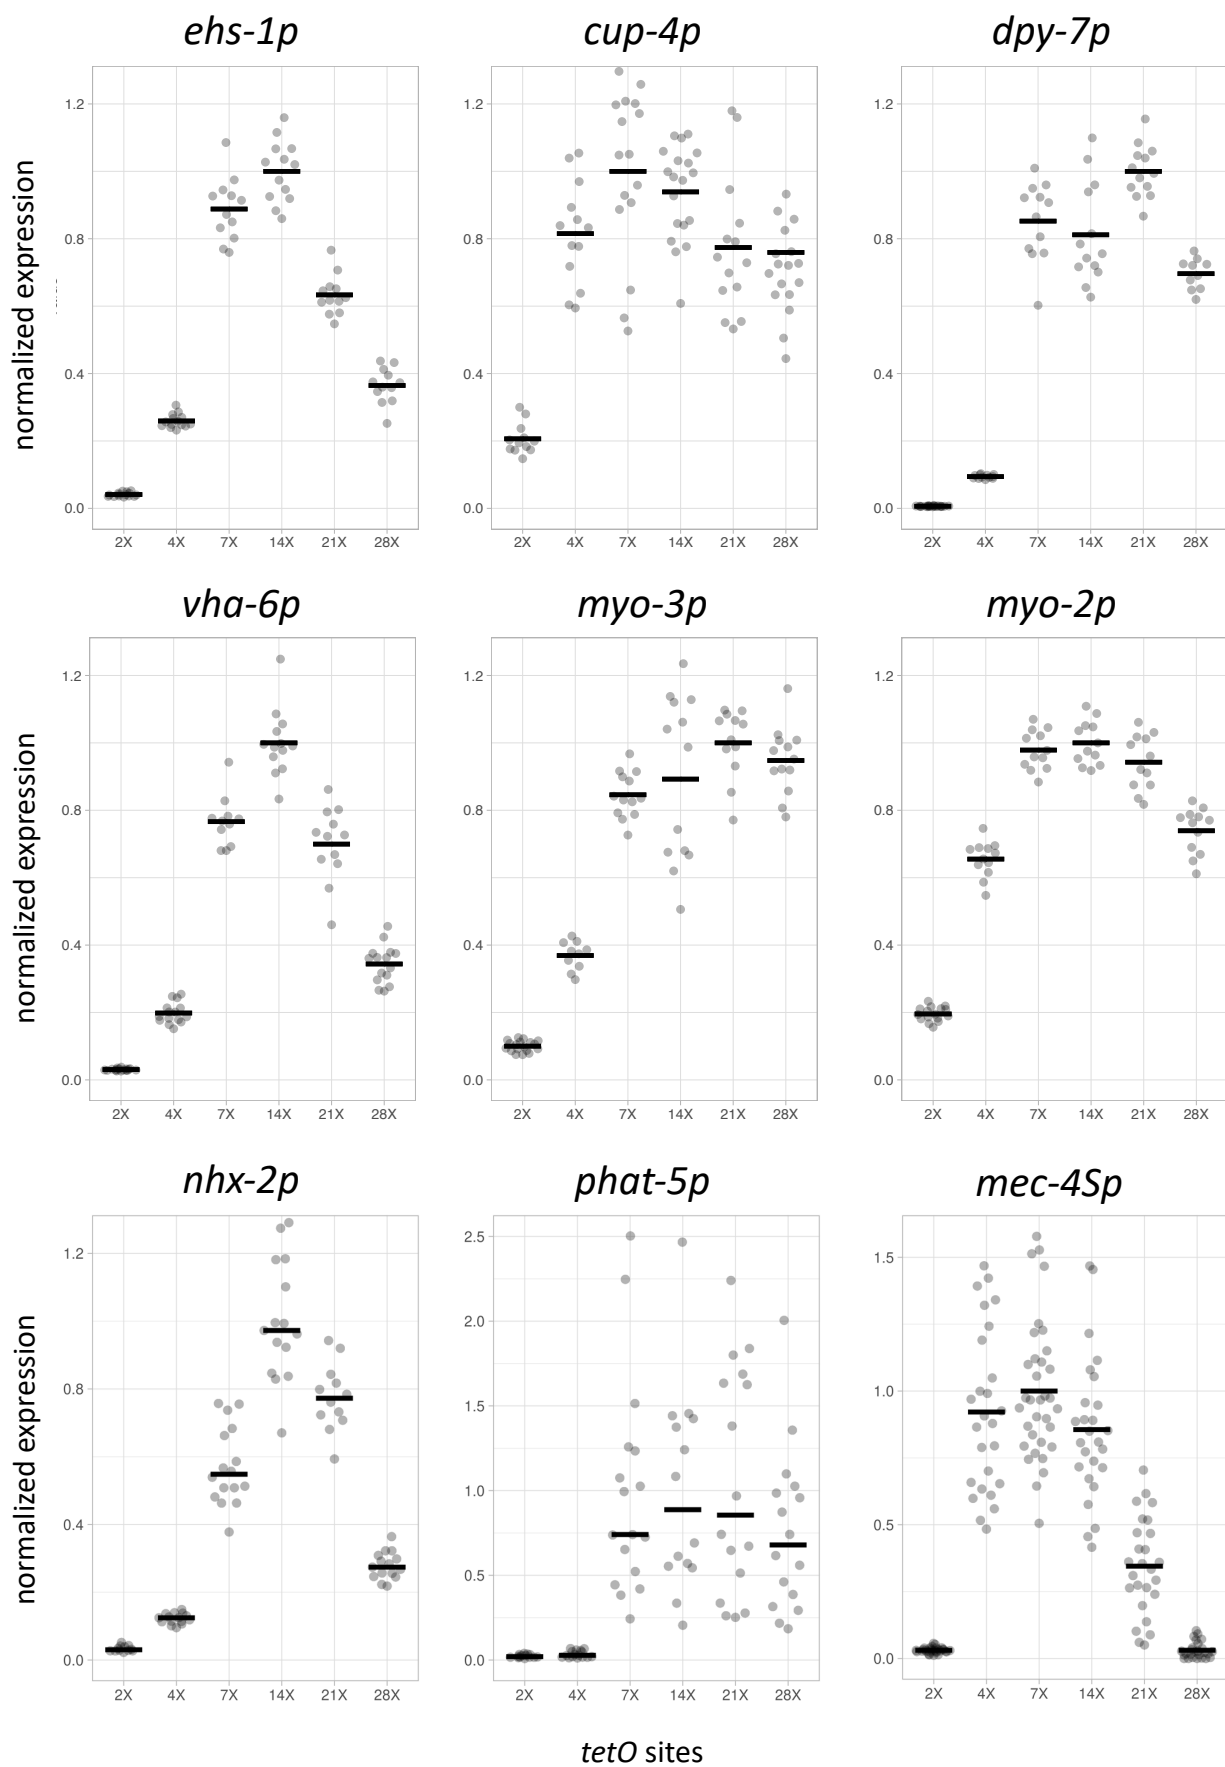

Figure S4

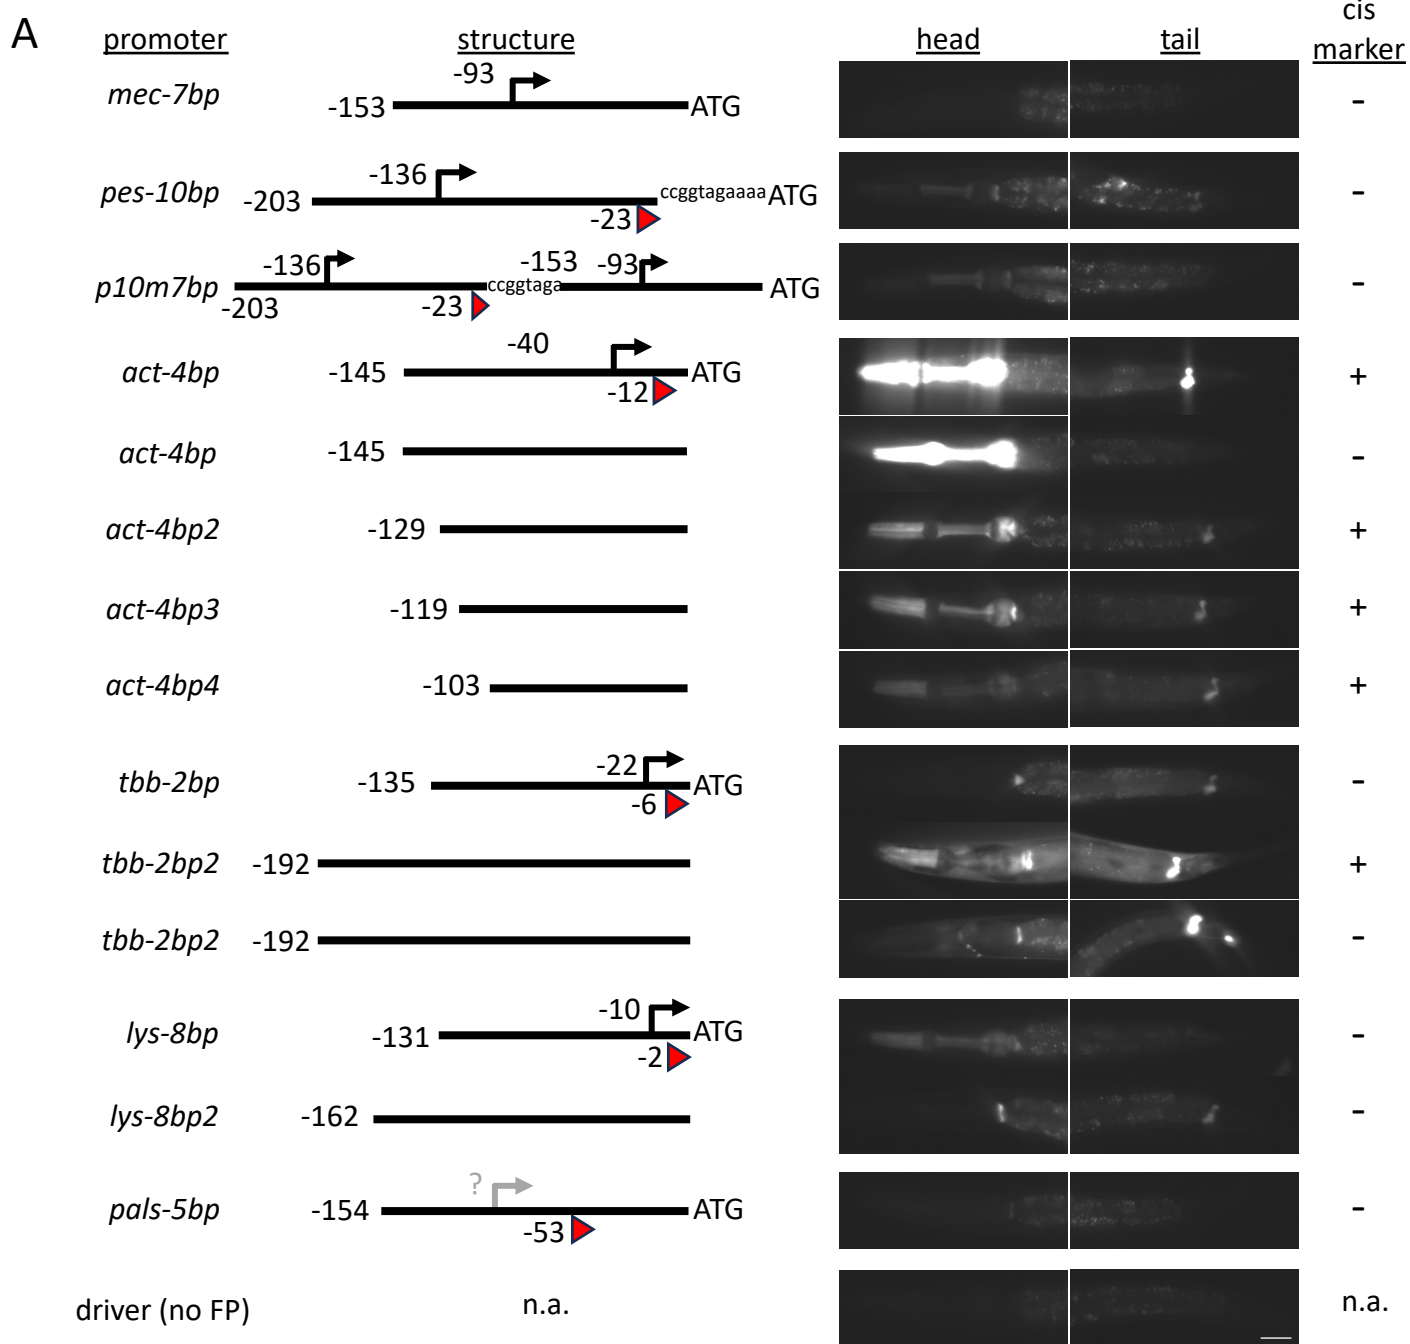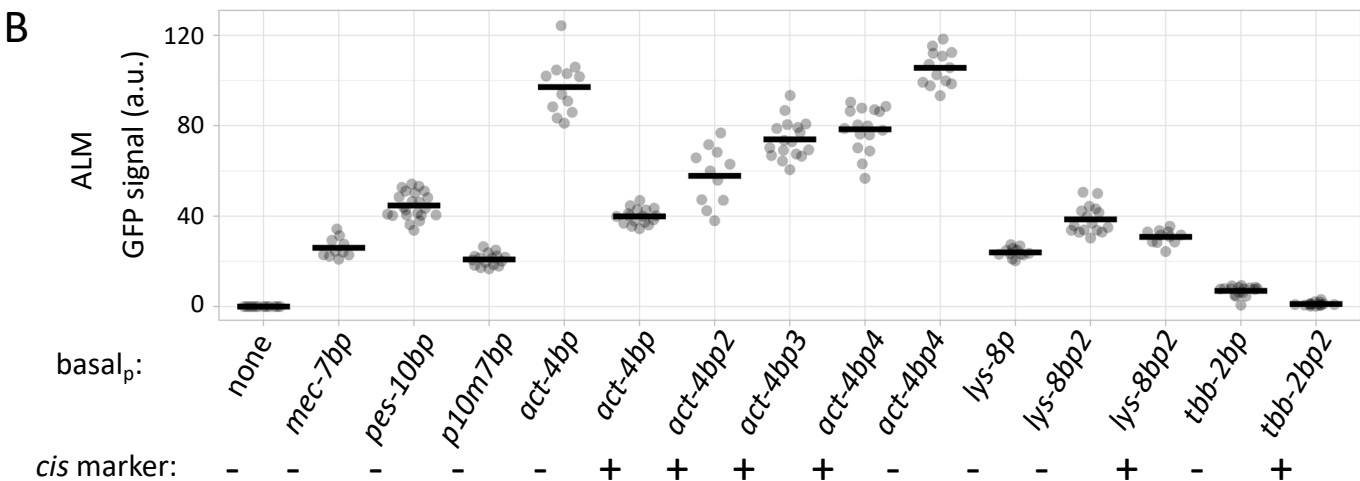

Figure S5

A reporters (Chr II):

driver: 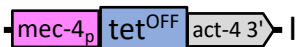

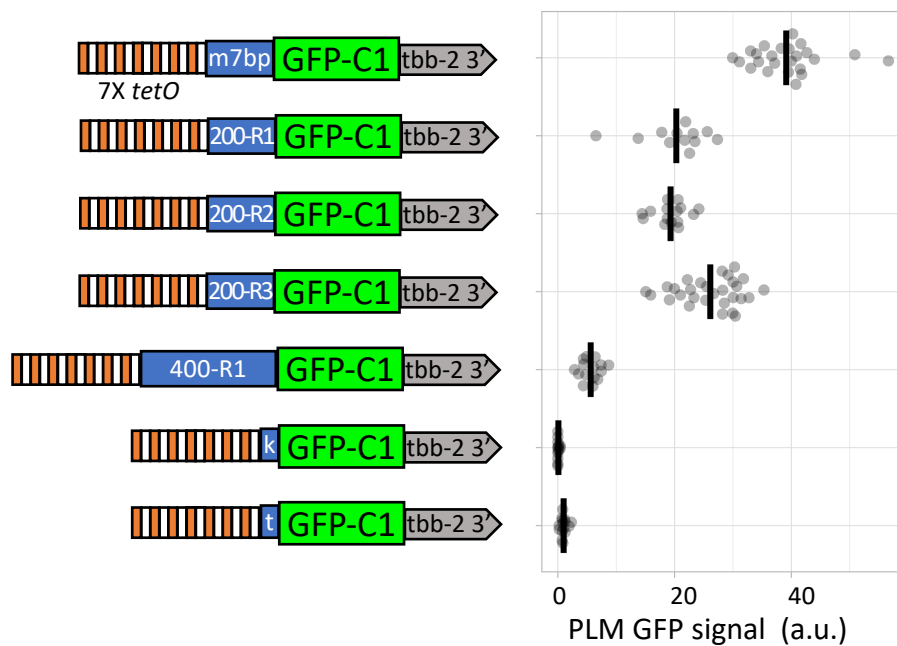

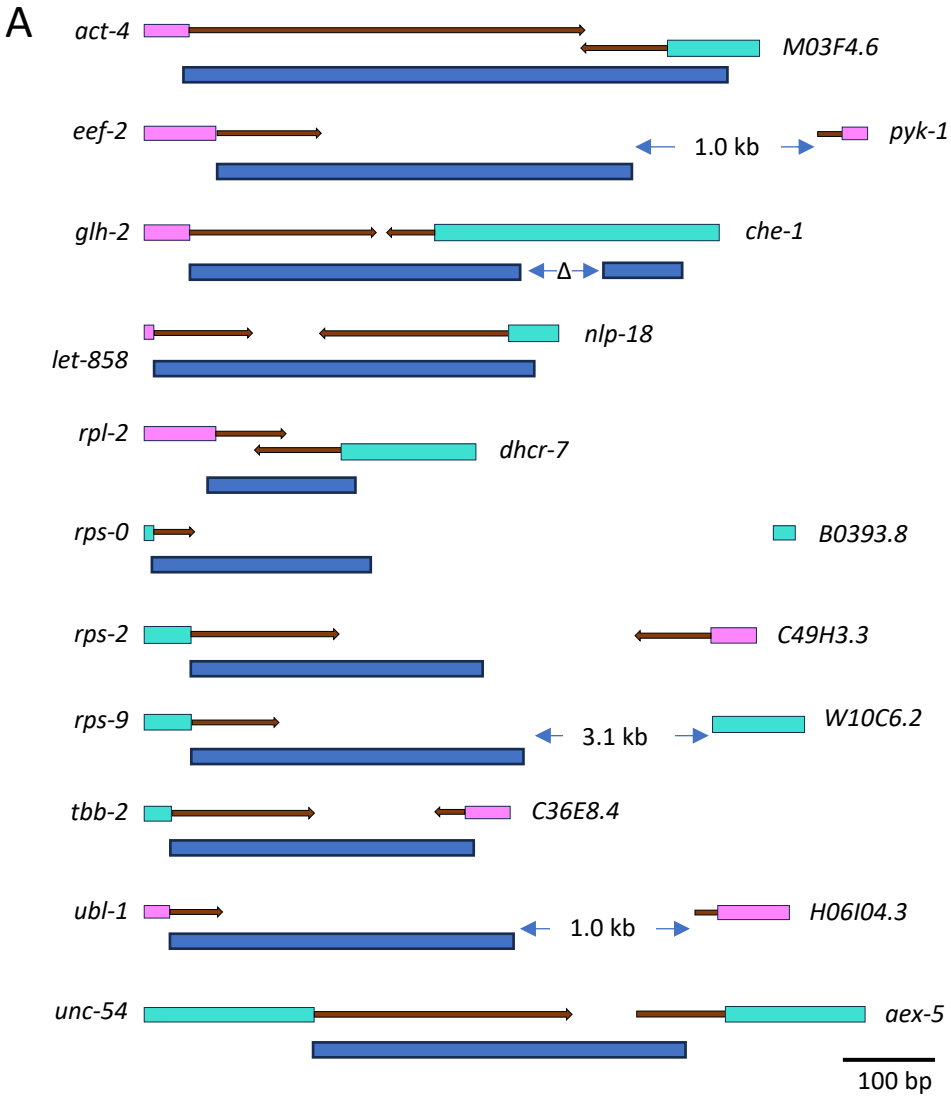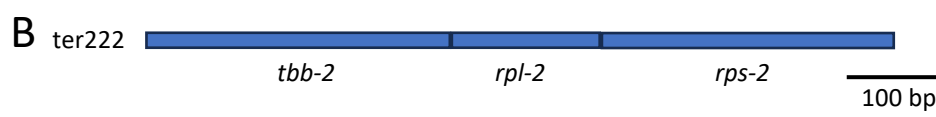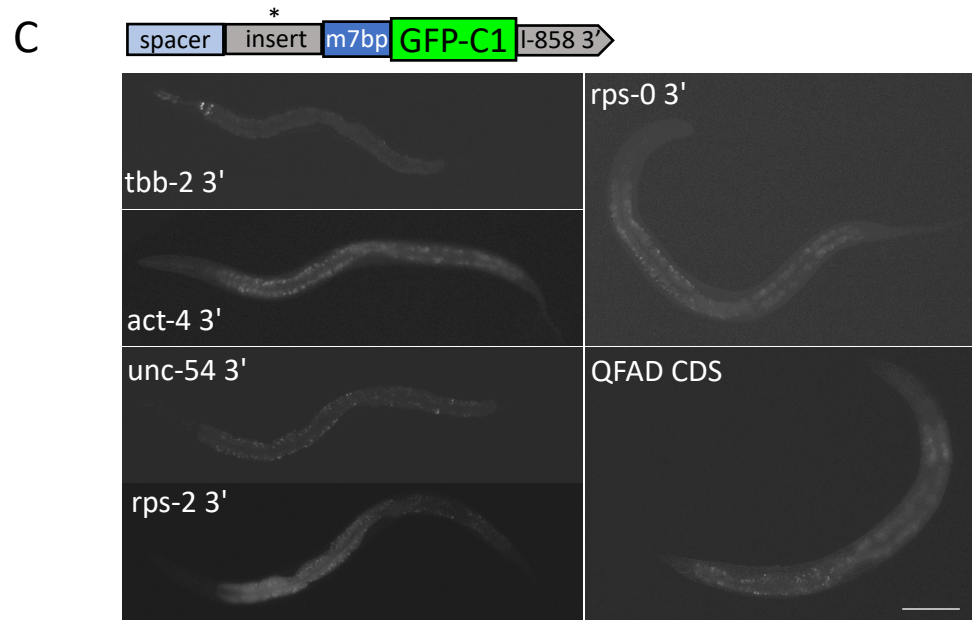

Figure S7

Supplement: Supplementary file 1 [file 1]
